# Supplementary material
Source: PubMed Central journal article supplement (PMC9904122)
Supplement: mmc2.pdf [file mmc2.pdf]

## Supplementary Materials\_averted\_by\_vaccine\_2

| State | Municipality              | Estimated population | D1_averted_cases | D1_averted_deaths | D2_averted_cases | D2_averted_deaths | D3_averted_cases | D3_averted_deaths |
|-------|---------------------------|----------------------|------------------|-------------------|------------------|-------------------|------------------|-------------------|
| RO    | Alta Floresta D'Oeste     | 22.516               | 89               | 31                | 86               | 27                | 8                | 3                 |
| RO    | Ariquemes                 | 111.148              | 439              | 152               | 422              | 133               | 39               | 14                |
| RO    | Cabixi                    | 5.067                | 20               | 7                 | 20               | 7                 | 2                | 1                 |
| RO    | Cacoal                    | 86.416               | 341              | 118               | 328              | 103               | 31               | 11                |
| RO    | Cerejeiras                | 16.088               | 64               | 22                | 61               | 20                | 6                | 3                 |
| RO    | Colorado do Oeste         | 15.213               | 60               | 21                | 58               | 19                | 6                | 2                 |
| RO    | Corumbiara                | 7.052                | 28               | 10                | 27               | 9                 | 3                | 1                 |
| RO    | Costa Marques             | 19.255               | 76               | 27                | 73               | 23                | 7                | 3                 |
| RO    | Espigão D'Oeste           | 33.009               | 131              | 46                | 126              | 40                | 12               | 5                 |
| RO    | Guajará-Mirim             | 46.930               | 186              | 65                | 178              | 56                | 17               | 6                 |
| RO    | Jaru                      | 51.469               | 203              | 71                | 195              | 62                | 19               | 7                 |
| RO    | Ji-Paraná                 | 131.026              | 517              | 179               | 497              | 156               | 46               | 17                |
| RO    | Machadinho D'Oeste        | 41.724               | 165              | 57                | 159              | 50                | 15               | 6                 |
| RO    | Nova Brasilândia D'Oeste  | 20.504               | 81               | 28                | 78               | 25                | 8                | 3                 |
| RO    | Ouro Preto do Oeste       | 35.445               | 140              | 49                | 135              | 43                | 13               | 5                 |
| RO    | Pimenta Bueno             | 37.098               | 147              | 51                | 141              | 45                | 13               | 5                 |
| RO    | Porto Velho               | 548.952              | 2165             | 750               | 2080             | 653               | 193              | 69                |
| RO    | Presidente Médici         | 18.165               | 72               | 25                | 69               | 22                | 7                | 3                 |
| RO    | Rio Crespo                | 3.843                | 16               | 6                 | 15               | 5                 | 2                | 1                 |
| RO    | Rolim de Moura            | 55.748               | 220              | 77                | 212              | 67                | 20               | 8                 |
| RO    | Santa Luzia D'Oeste       | 5.942                | 24               | 9                 | 23               | 8                 | 3                | 1                 |
| RO    | Vilhena                   | 104.517              | 413              | 143               | 396              | 125               | 37               | 14                |
| RO    | São Miguel do Guaporé     | 23.147               | 92               | 32                | 88               | 28                | 9                | 3                 |
| RO    | Nova Mamoré               | 32.184               | 127              | 44                | 122              | 39                | 12               | 5                 |
| RO    | Alvorada D'Oeste          | 13.807               | 55               | 19                | 53               | 17                | 5                | 2                 |
| RO    | Alto Alegre dos Parecis   | 13.268               | 53               | 19                | 51               | 16                | 5                | 2                 |
| RO    | Alto Paraíso              | 22.258               | 88               | 31                | 85               | 27                | 8                | 3                 |
| RO    | Buritis                   | 41.043               | 162              | 57                | 156              | 49                | 15               | 6                 |
| RO    | Novo Horizonte do Oeste   | 8.125                | 33               | 12                | 31               | 10                | 3                | 2                 |
| RO    | Cacaulândia               | 6.307                | 25               | 9                 | 24               | 8                 | 3                | 1                 |
| RO    | Campo Novo de Rondônia    | 14.391               | 57               | 20                | 55               | 18                | 6                | 2                 |
| RO    | Candeias do Jamari        | 28.068               | 111              | 39                | 107              | 34                | 10               | 4                 |
| RO    | Castanheiras              | 2.923                | 12               | 4                 | 12               | 4                 | 2                | 1                 |
| RO    | Chupinguaia               | 11.755               | 47               | 17                | 45               | 14                | 5                | 2                 |
| RO    | Cujubim                   | 27.131               | 107              | 38                | 103              | 33                | 10               | 4                 |
| RO    | Governador Jorge Teixeira | 7.130                | 29               | 10                | 28               | 9                 | 3                | 1                 |
| RO    | Itapuã do Oeste           | 10.819               | 43               | 15                | 41               | 13                | 4                | 2                 |
| RO    | Ministro Andreazza        | 9.461                | 38               | 13                | 36               | 12                | 4                | 2                 |
| RO    | Mirante da Serra          | 10.691               | 43               | 15                | 41               | 13                | 4                | 2                 |
| RO    | Monte Negro               | 16.158               | 64               | 23                | 62               | 20                | 6                | 3                 |
| RO    | Nova União                | 6.822                | 27               | 10                | 26               | 9                 | 3                | 1                 |
| RO    | Parecis                   | 6.319                | 25               | 9                 | 24               | 8                 | 3                | 1                 |
| RO    | Pimenteiras do Oeste      | 2.127                | 9                | 3                 | 9                | 3                 | 1                | 1                 |
| RO    | Primavera de Rondônia     | 2.697                | 11               | 4                 | 11               | 4                 | 1                | 1                 |
| RO    | São Felipe D'Oeste        | 4.962                | 20               | 7                 | 19               | 6                 | 2                | 1                 |
| RO    | São Francisco do Guaporé  | 21.088               | 84               | 29                | 80               | 26                | 8                | 3                 |
| RO    | Seringueiras              | 11.846               | 47               | 17                | 45               | 15                | 5                | 2                 |
| RO    | Teixeirópolis             | 4.160                | 17               | 6                 | 16               | 5                 | 2                | 1                 |
| RO    | Theobroma                 | 10.348               | 41               | 15                | 40               | 13                | 4                | 2                 |
| RO    | Urupá                     | 11.081               | 44               | 16                | 42               | 14                | 4                | 2                 |
| RO    | Vale do Anari             | 11.545               | 46               | 16                | 44               | 14                | 5                | 2                 |
| RO    | Vale do Paraíso           | 6.490                | 26               | 9                 | 25               | 8                 | 3                | 1                 |
| AC    | Acrelândia                | 15.721               | 56               | 20                | 54               | 17                | 5                | 2                 |
| AC    | Assis Brasil              | 7.649                | 27               | 10                | 26               | 9                 | 3                | 1                 |
| AC    | Brasiléia                 | 27.123               | 96               | 33                | 92               | 29                | 9                | 4                 |
| AC    | Bujari                    | 10.572               | 38               | 13                | 36               | 12                | 4                | 2                 |
| AC    | Capixaba                  | 12.280               | 44               | 15                | 42               | 14                | 4                | 2                 |
| AC    | Cruzeiro do Sul           | 89.760               | 316              | 110               | 303              | 96                | 29               | 10                |
| AC    | Epitaciolândia            | 18.979               | 67               | 24                | 65               | 21                | 6                | 3                 |
| AC    | Feijó                     | 34.986               | 123              | 43                | 119              | 38                | 11               | 4                 |
| AC    | Jordão                    | 8.628                | 31               | 11                | 30               | 10                | 3                | 1                 |
| AC    | Mâncio Lima               | 19.643               | 69               | 24                | 67               | 21                | 7                | 3                 |
| AC    | Manoel Urbano             | 9.701                | 35               | 12                | 33               | 11                | 4                | 2                 |
| AC    | Marechal Thaumaturgo      | 19.727               | 70               | 24                | 67               | 21                | 7                | 3                 |

|    |                           |           |      |      |      |      |     |     |
|----|---------------------------|-----------|------|------|------|------|-----|-----|
| AC | Plácido de Castro         | 20.147    | 71   | 25   | 68   | 22   | 7   | 3   |
| AC | Porto Walter              | 12.497    | 44   | 16   | 43   | 14   | 4   | 2   |
| AC | Rio Branco                | 419.452   | 1474 | 511  | 1416 | 445  | 131 | 47  |
| AC | Rodrigues Alves           | 19.767    | 70   | 25   | 67   | 21   | 7   | 3   |
| AC | Santa Rosa do Purus       | 6.893     | 25   | 9    | 24   | 8    | 3   | 1   |
| AC | Senador Guimard           | 23.446    | 83   | 29   | 80   | 25   | 8   | 3   |
| AC | Sena Madureira            | 47.168    | 166  | 58   | 160  | 50   | 15  | 6   |
| AC | Tarauacá                  | 43.730    | 154  | 54   | 148  | 47   | 14  | 5   |
| AC | Xapuri                    | 19.866    | 70   | 25   | 68   | 22   | 7   | 3   |
| AC | Porto Acre                | 19.141    | 68   | 24   | 65   | 21   | 6   | 3   |
| AM | Alvarães                  | 16.396    | 59   | 21   | 57   | 18   | 6   | 2   |
| AM | Amaturá                   | 11.934    | 43   | 15   | 41   | 13   | 4   | 2   |
| AM | Anamá                     | 14.292    | 51   | 18   | 49   | 16   | 5   | 2   |
| AM | Anori                     | 21.937    | 79   | 28   | 76   | 24   | 7   | 3   |
| AM | Apuí                      | 22.739    | 82   | 29   | 78   | 25   | 8   | 3   |
| AM | Atalaia do Norte          | 20.868    | 75   | 26   | 72   | 23   | 7   | 3   |
| AM | Autazes                   | 41.005    | 147  | 51   | 141  | 45   | 13  | 5   |
| AM | Barcelos                  | 27.772    | 100  | 35   | 96   | 30   | 9   | 4   |
| AM | Barreirinha               | 32.919    | 118  | 41   | 113  | 36   | 11  | 4   |
| AM | Benjamin Constant         | 44.873    | 161  | 56   | 154  | 49   | 15  | 6   |
| AM | Beruri                    | 20.503    | 74   | 26   | 71   | 23   | 7   | 3   |
| AM | Boa Vista do Ramos        | 20.040    | 72   | 25   | 69   | 22   | 7   | 3   |
| AM | Boca do Acre              | 34.958    | 125  | 44   | 120  | 38   | 12  | 4   |
| AM | Borba                     | 42.328    | 151  | 53   | 146  | 46   | 14  | 5   |
| AM | Caapiranga                | 13.482    | 49   | 17   | 47   | 15   | 5   | 2   |
| AM | Canutama                  | 15.981    | 57   | 20   | 55   | 18   | 6   | 2   |
| AM | Carauri                   | 28.719    | 103  | 36   | 99   | 31   | 10  | 4   |
| AM | Careiro                   | 38.820    | 139  | 48   | 134  | 42   | 13  | 5   |
| AM | Careiro da Várzea         | 31.459    | 113  | 39   | 108  | 34   | 10  | 4   |
| AM | Coarí                     | 86.713    | 310  | 108  | 298  | 94   | 28  | 10  |
| AM | Codajás                   | 29.691    | 106  | 37   | 102  | 32   | 10  | 4   |
| AM | Eirunepé                  | 36.121    | 129  | 45   | 124  | 39   | 12  | 5   |
| AM | Envira                    | 20.748    | 74   | 26   | 72   | 23   | 7   | 3   |
| AM | Fonte Boa                 | 16.409    | 59   | 21   | 57   | 18   | 6   | 2   |
| AM | Guajará                   | 17.193    | 62   | 22   | 59   | 19   | 6   | 2   |
| AM | Humaitá                   | 57.195    | 204  | 71   | 196  | 62   | 19  | 7   |
| AM | Ipixuna                   | 31.172    | 112  | 39   | 107  | 34   | 10  | 4   |
| AM | Irlanduba                 | 49.718    | 178  | 62   | 171  | 54   | 16  | 6   |
| AM | Itacoatiara               | 104.046   | 372  | 129  | 357  | 112  | 33  | 12  |
| AM | Itamarati                 | 7.777     | 28   | 10   | 27   | 9    | 3   | 1   |
| AM | Itapiranga                | 9.312     | 34   | 12   | 32   | 11   | 3   | 2   |
| AM | Japurá                    | 1.755     | 7    | 3    | 7    | 2    | 1   | 1   |
| AM | Juruá                     | 15.495    | 56   | 20   | 54   | 17   | 5   | 2   |
| AM | Jutaí                     | 13.462    | 49   | 17   | 47   | 15   | 5   | 2   |
| AM | Lábrea                    | 47.685    | 171  | 59   | 164  | 52   | 16  | 6   |
| AM | Manacapuru                | 99.613    | 356  | 123  | 342  | 108  | 32  | 12  |
| AM | Manaquiri                 | 33.981    | 122  | 42   | 117  | 37   | 11  | 4   |
| AM | Manaus                    | 2.255.903 | 8045 | 2786 | 7730 | 2428 | 715 | 257 |
| AM | Manicoré                  | 57.405    | 205  | 71   | 197  | 62   | 19  | 7   |
| AM | Maraã                     | 18.298    | 66   | 23   | 63   | 20   | 6   | 3   |
| AM | Maués                     | 66.159    | 236  | 82   | 227  | 72   | 21  | 8   |
| AM | Nhamundá                  | 21.710    | 78   | 27   | 75   | 24   | 7   | 3   |
| AM | Nova Olinda do Norte      | 38.665    | 138  | 48   | 133  | 42   | 13  | 5   |
| AM | Novo Airão                | 20.395    | 73   | 26   | 70   | 22   | 7   | 3   |
| AM | Novo Aripuanã             | 26.443    | 95   | 33   | 91   | 29   | 9   | 4   |
| AM | Parintins                 | 116.439   | 416  | 144  | 399  | 126  | 37  | 14  |
| AM | Pauini                    | 19.616    | 70   | 25   | 68   | 22   | 7   | 3   |
| AM | Presidente Figueiredo     | 38.095    | 136  | 48   | 131  | 41   | 13  | 5   |
| AM | Rio Preto da Eva          | 34.856    | 125  | 44   | 120  | 38   | 12  | 4   |
| AM | Santa Isabel do Rio Negro | 26.566    | 95   | 33   | 92   | 29   | 9   | 4   |
| AM | Santo Antônio do Içá      | 20.889    | 75   | 26   | 72   | 23   | 7   | 3   |
| AM | São Gabriel da Cachoeira  | 47.031    | 168  | 59   | 162  | 51   | 15  | 6   |
| AM | São Paulo de Olivença     | 40.837    | 146  | 51   | 140  | 44   | 13  | 5   |
| AM | São Sebastião do Uatumã   | 14.678    | 53   | 19   | 51   | 16   | 5   | 2   |
| AM | Silves                    | 9.289     | 34   | 12   | 32   | 10   | 3   | 2   |
| AM | Tabatinga                 | 68.502    | 245  | 85   | 235  | 74   | 22  | 8   |

|    |                          |           |      |      |      |      |     |     |
|----|--------------------------|-----------|------|------|------|------|-----|-----|
| AM | Tapauá                   | 16.876    | 61   | 21   | 58   | 19   | 6   | 2   |
| AM | Tefé                     | 59.250    | 212  | 74   | 204  | 64   | 19  | 7   |
| AM | Tonantins                | 19.038    | 68   | 24   | 66   | 21   | 7   | 3   |
| AM | Uarini                   | 13.839    | 50   | 18   | 48   | 15   | 5   | 2   |
| AM | Urucará                  | 16.007    | 58   | 20   | 55   | 18   | 6   | 2   |
| AM | Urucurituba              | 24.098    | 86   | 30   | 83   | 26   | 8   | 3   |
| RR | Amajari                  | 13.561    | 51   | 18   | 49   | 16   | 5   | 2   |
| RR | Alto Alegre              | 15.249    | 57   | 20   | 55   | 18   | 6   | 2   |
| RR | Boa Vista                | 436.591   | 1631 | 564  | 1566 | 492  | 145 | 52  |
| RR | Bonfim                   | 12.701    | 48   | 17   | 46   | 15   | 5   | 2   |
| RR | Cantá                    | 19.257    | 72   | 25   | 70   | 22   | 7   | 3   |
| RR | Caracará                 | 22.635    | 85   | 30   | 82   | 26   | 8   | 3   |
| RR | Caroebe                  | 10.595    | 40   | 14   | 38   | 12   | 4   | 2   |
| RR | Iracema                  | 12.637    | 48   | 17   | 46   | 15   | 5   | 2   |
| RR | Mucajá                   | 18.482    | 70   | 24   | 67   | 21   | 7   | 3   |
| RR | Normandia                | 11.772    | 44   | 16   | 43   | 14   | 4   | 2   |
| RR | Pacaraima                | 20.108    | 76   | 26   | 73   | 23   | 7   | 3   |
| RR | Rorainópolis             | 31.387    | 118  | 41   | 113  | 36   | 11  | 4   |
| RR | São João da Baliza       | 8.492     | 32   | 11   | 31   | 10   | 3   | 2   |
| RR | São Luiz                 | 8.232     | 31   | 11   | 30   | 10   | 3   | 1   |
| RR | Uiramutã                 | 11.014    | 42   | 15   | 40   | 13   | 4   | 2   |
| PA | Abaetetuba               | 160.439   | 600  | 208  | 577  | 181  | 54  | 20  |
| PA | Abel Figueiredo          | 7.536     | 29   | 10   | 28   | 9    | 3   | 1   |
| PA | Acará                    | 55.744    | 209  | 73   | 201  | 63   | 19  | 7   |
| PA | Afuá                     | 39.910    | 150  | 52   | 144  | 46   | 14  | 5   |
| PA | Água Azul do Norte       | 27.797    | 104  | 36   | 100  | 32   | 10  | 4   |
| PA | Alenquer                 | 57.390    | 215  | 75   | 207  | 65   | 20  | 7   |
| PA | Almeirim                 | 34.044    | 128  | 45   | 123  | 39   | 12  | 5   |
| PA | Altamira                 | 117.320   | 439  | 152  | 422  | 133  | 39  | 14  |
| PA | Anajás                   | 30.091    | 113  | 39   | 109  | 34   | 10  | 4   |
| PA | Ananindeua               | 540.410   | 2020 | 700  | 1941 | 610  | 180 | 65  |
| PA | Anapu                    | 29.312    | 110  | 38   | 106  | 34   | 10  | 4   |
| PA | Augusto Corrêa           | 46.937    | 176  | 61   | 169  | 53   | 16  | 6   |
| PA | Aurora do Pará           | 32.200    | 121  | 42   | 116  | 37   | 11  | 4   |
| PA | Aveiro                   | 16.421    | 62   | 22   | 59   | 19   | 6   | 2   |
| PA | Bagre                    | 31.967    | 120  | 42   | 115  | 37   | 11  | 4   |
| PA | Baião                    | 49.454    | 185  | 64   | 178  | 56   | 17  | 6   |
| PA | Bannach                  | 3.239     | 13   | 5    | 12   | 4    | 2   | 1   |
| PA | Barcarena                | 129.333   | 484  | 168  | 465  | 146  | 43  | 16  |
| PA | Belém                    | 1.506.420 | 5631 | 1950 | 5410 | 1699 | 501 | 180 |
| PA | Belterra                 | 17.944    | 68   | 24   | 65   | 21   | 6   | 3   |
| PA | Benevides                | 64.780    | 243  | 84   | 233  | 74   | 22  | 8   |
| PA | Bom Jesus do Tocantins   | 17.254    | 65   | 23   | 62   | 20   | 6   | 3   |
| PA | Bonito                   | 16.769    | 63   | 22   | 61   | 19   | 6   | 2   |
| PA | Bragança                 | 130.122   | 487  | 169  | 468  | 147  | 44  | 16  |
| PA | Brasil Novo              | 14.883    | 56   | 20   | 54   | 17   | 5   | 2   |
| PA | Brejo Grande do Araguaia | 7.357     | 28   | 10   | 27   | 9    | 3   | 1   |
| PA | Breu Branco              | 68.597    | 257  | 89   | 247  | 78   | 23  | 9   |
| PA | Breves                   | 104.280   | 390  | 135  | 375  | 118  | 35  | 13  |
| PA | Bujaru                   | 29.717    | 112  | 39   | 107  | 34   | 10  | 4   |
| PA | Cachoeira do Piriá       | 35.307    | 132  | 46   | 127  | 40   | 12  | 5   |
| PA | Cachoeira do Arari       | 24.355    | 92   | 32   | 88   | 28   | 9   | 3   |
| PA | Cametá                   | 140.814   | 527  | 183  | 506  | 159  | 47  | 17  |
| PA | Canaã dos Carajás        | 39.103    | 147  | 51   | 141  | 45   | 13  | 5   |
| PA | Capanema                 | 69.828    | 261  | 91   | 251  | 79   | 24  | 9   |
| PA | Capitão Poço             | 54.545    | 204  | 71   | 196  | 62   | 19  | 7   |
| PA | Castanhal                | 205.667   | 769  | 267  | 739  | 232  | 69  | 25  |
| PA | Chaves                   | 24.175    | 91   | 32   | 87   | 28   | 9   | 3   |
| PA | Colares                  | 12.175    | 46   | 16   | 44   | 14   | 5   | 2   |
| PA | Conceição do Araguaia    | 48.115    | 180  | 63   | 173  | 55   | 16  | 6   |
| PA | Concórdia do Pará        | 34.236    | 128  | 45   | 123  | 39   | 12  | 5   |
| PA | Cumarú do Norte          | 14.044    | 53   | 19   | 51   | 16   | 5   | 2   |
| PA | Curionópolis             | 17.764    | 67   | 23   | 64   | 21   | 6   | 3   |
| PA | Curralinho               | 35.530    | 133  | 46   | 128  | 41   | 12  | 5   |
| PA | Curuá                    | 14.776    | 56   | 20   | 54   | 17   | 5   | 2   |
| PA | Curuçá                   | 41.093    | 154  | 54   | 148  | 47   | 14  | 5   |

|    |                           |         |      |     |      |     |    |    |
|----|---------------------------|---------|------|-----|------|-----|----|----|
| PA | Dom Eliseu                | 61.206  | 229  | 80  | 220  | 70  | 21 | 8  |
| PA | Eldorado do Carajás       | 34.069  | 128  | 45  | 123  | 39  | 12 | 5  |
| PA | Faro                      | 6.949   | 26   | 9   | 25   | 8   | 3  | 1  |
| PA | Floresta do Araguaia      | 20.742  | 78   | 27  | 75   | 24  | 7  | 3  |
| PA | Garrafão do Norte         | 26.155  | 98   | 34  | 94   | 30  | 9  | 4  |
| PA | Goianésia do Pará         | 41.678  | 156  | 54  | 150  | 47  | 14 | 5  |
| PA | Gurupá                    | 34.127  | 128  | 45  | 123  | 39  | 12 | 5  |
| PA | Igarapé-Açu               | 39.234  | 147  | 51  | 141  | 45  | 14 | 5  |
| PA | Igarapé-Miri              | 63.367  | 237  | 82  | 228  | 72  | 22 | 8  |
| PA | Inhangapi                 | 12.009  | 45   | 16  | 44   | 14  | 4  | 2  |
| PA | Ipixuna do Pará           | 67.170  | 252  | 87  | 242  | 76  | 23 | 9  |
| PA | Irituia                   | 32.639  | 122  | 43  | 118  | 37  | 11 | 4  |
| PA | Itaituba                  | 101.541 | 380  | 132 | 365  | 115 | 34 | 13 |
| PA | Itupiranga                | 53.439  | 200  | 70  | 192  | 61  | 18 | 7  |
| PA | Jacareacanga              | 6.952   | 26   | 9   | 25   | 8   | 3  | 1  |
| PA | Jacundá                   | 60.517  | 227  | 79  | 218  | 69  | 21 | 8  |
| PA | Juruti                    | 59.961  | 225  | 78  | 216  | 68  | 20 | 8  |
| PA | Limoeiro do Ajuru         | 29.623  | 111  | 39  | 107  | 34  | 10 | 4  |
| PA | Mãe do Rio                | 30.389  | 114  | 40  | 110  | 35  | 11 | 4  |
| PA | Magalhães Barata          | 8.598   | 33   | 12  | 31   | 10  | 3  | 2  |
| PA | Marabá                    | 287.664 | 1076 | 373 | 1033 | 325 | 96 | 35 |
| PA | Maracanã                  | 29.559  | 111  | 39  | 107  | 34  | 10 | 4  |
| PA | Marapanim                 | 28.563  | 107  | 37  | 103  | 33  | 10 | 4  |
| PA | Marituba                  | 135.812 | 508  | 176 | 488  | 154 | 46 | 17 |
| PA | Medicilândia              | 32.347  | 121  | 42  | 117  | 37  | 11 | 4  |
| PA | Melgaço                   | 28.121  | 106  | 37  | 101  | 32  | 10 | 4  |
| PA | Mocajuba                  | 31.917  | 120  | 42  | 115  | 36  | 11 | 4  |
| PA | Moju                      | 84.251  | 315  | 110 | 303  | 96  | 28 | 11 |
| PA | Mojú dos Campos           | 16.282  | 61   | 22  | 59   | 19  | 6  | 2  |
| PA | Monte Alegre              | 58.289  | 218  | 76  | 210  | 66  | 20 | 7  |
| PA | Muaná                     | 41.454  | 155  | 54  | 149  | 47  | 14 | 5  |
| PA | Nova Esperança do Piriá   | 21.519  | 81   | 28  | 78   | 25  | 8  | 3  |
| PA | Nova Ipixuna              | 17.027  | 64   | 23  | 62   | 20  | 6  | 3  |
| PA | Nova Timboteua            | 15.646  | 59   | 21  | 57   | 18  | 6  | 2  |
| PA | Novo Progresso            | 25.769  | 97   | 34  | 93   | 30  | 9  | 4  |
| PA | Novo Repartimento         | 78.488  | 294  | 102 | 282  | 89  | 27 | 10 |
| PA | Óbidos                    | 52.473  | 197  | 68  | 189  | 60  | 18 | 7  |
| PA | Oeiras do Pará            | 33.182  | 125  | 43  | 120  | 38  | 12 | 4  |
| PA | Oriximiná                 | 74.921  | 281  | 97  | 270  | 85  | 25 | 9  |
| PA | Ourém                     | 18.079  | 68   | 24  | 65   | 21  | 7  | 3  |
| PA | Ourilândia do Norte       | 33.831  | 127  | 44  | 122  | 39  | 12 | 5  |
| PA | Pacajá                    | 49.110  | 184  | 64  | 177  | 56  | 17 | 6  |
| PA | Palestina do Pará         | 7.575   | 29   | 10  | 28   | 9   | 3  | 1  |
| PA | Paragominas               | 115.838 | 433  | 150 | 416  | 131 | 39 | 14 |
| PA | Parauapebas               | 218.787 | 818  | 284 | 786  | 247 | 73 | 27 |
| PA | Pau D'Arco                | 5.339   | 20   | 7   | 20   | 7   | 2  | 1  |
| PA | Peixe-Boi                 | 8.084   | 31   | 11  | 30   | 10  | 3  | 1  |
| PA | Piçarra                   | 12.976  | 49   | 17  | 47   | 15  | 5  | 2  |
| PA | Placas                    | 32.325  | 121  | 42  | 117  | 37  | 11 | 4  |
| PA | Ponta de Pedras           | 32.007  | 120  | 42  | 115  | 37  | 11 | 4  |
| PA | Portel                    | 63.831  | 239  | 83  | 230  | 72  | 22 | 8  |
| PA | Porto de Moz              | 42.456  | 159  | 55  | 153  | 48  | 15 | 6  |
| PA | Praíha                    | 29.827  | 112  | 39  | 108  | 34  | 10 | 4  |
| PA | Primavera                 | 10.889  | 41   | 15  | 40   | 13  | 4  | 2  |
| PA | Quatipuru                 | 13.794  | 52   | 18  | 50   | 16  | 5  | 2  |
| PA | Redenção                  | 86.326  | 323  | 112 | 310  | 98  | 29 | 11 |
| PA | Rio Maria                 | 18.208  | 69   | 24  | 66   | 21  | 7  | 3  |
| PA | Rondon do Pará            | 53.242  | 199  | 69  | 192  | 61  | 18 | 7  |
| PA | Rurópolis                 | 52.473  | 197  | 68  | 189  | 60  | 18 | 7  |
| PA | Salinópolis               | 41.164  | 154  | 54  | 148  | 47  | 14 | 5  |
| PA | Salvaterra                | 24.392  | 92   | 32  | 88   | 28  | 9  | 3  |
| PA | Santa Bárbara do Pará     | 21.811  | 82   | 29  | 79   | 25  | 8  | 3  |
| PA | Santa Cruz do Arari       | 10.496  | 40   | 14  | 38   | 12  | 4  | 2  |
| PA | Santa Izabel do Pará      | 72.856  | 273  | 95  | 262  | 83  | 25 | 9  |
| PA | Santa Luzia do Pará       | 19.839  | 75   | 26  | 72   | 23  | 7  | 3  |
| PA | Santa Maria das Barreiras | 22.244  | 84   | 29  | 80   | 26  | 8  | 3  |

|    |                            |         |      |     |      |     |     |    |
|----|----------------------------|---------|------|-----|------|-----|-----|----|
| PA | Santa Maria do Pará        | 25.127  | 94   | 33  | 91   | 29  | 9   | 3  |
| PA | Santana do Araguaia        | 75.995  | 285  | 99  | 273  | 86  | 26  | 10 |
| PA | Santarém                   | 308.339 | 1153 | 400 | 1108 | 348 | 103 | 37 |
| PA | Santarém Novo              | 6.796   | 26   | 9   | 25   | 8   | 3   | 1  |
| PA | Santo Antônio do Tauá      | 32.346  | 121  | 42  | 117  | 37  | 11  | 4  |
| PA | São Caetano de Odivelas    | 18.207  | 69   | 24  | 66   | 21  | 7   | 3  |
| PA | São Domingos do Araguaia   | 25.945  | 97   | 34  | 94   | 30  | 9   | 4  |
| PA | São Domingos do Capim      | 32.285  | 121  | 42  | 116  | 37  | 11  | 4  |
| PA | São Félix do Xingu         | 135.732 | 508  | 176 | 488  | 154 | 46  | 17 |
| PA | São Francisco do Pará      | 15.978  | 60   | 21  | 58   | 19  | 6   | 2  |
| PA | São Geraldo do Araguaia    | 24.566  | 92   | 32  | 89   | 28  | 9   | 3  |
| PA | São João da Ponta          | 6.294   | 24   | 9   | 23   | 8   | 3   | 1  |
| PA | São João de Pirabas        | 23.440  | 88   | 31  | 85   | 27  | 8   | 3  |
| PA | São João do Araguaia       | 14.105  | 53   | 19  | 51   | 16  | 5   | 2  |
| PA | São Miguel do Guamá        | 60.268  | 226  | 78  | 217  | 68  | 21  | 8  |
| PA | São Sebastião da Boa Vista | 27.302  | 103  | 36  | 99   | 31  | 10  | 4  |
| PA | Sapucaia                   | 6.088   | 23   | 8   | 22   | 7   | 3   | 1  |
| PA | Senador José Porfírio      | 11.305  | 43   | 15  | 41   | 13  | 4   | 2  |
| PA | Soure                      | 25.752  | 97   | 34  | 93   | 30  | 9   | 4  |
| PA | Tailândia                  | 111.554 | 417  | 145 | 401  | 126 | 38  | 14 |
| PA | Terra Alta                 | 11.971  | 45   | 16  | 43   | 14  | 4   | 2  |
| PA | Terra Santa                | 19.063  | 72   | 25  | 69   | 22  | 7   | 3  |
| PA | Tomé-Açu                   | 64.604  | 242  | 84  | 232  | 73  | 22  | 8  |
| PA | Tracuateua                 | 31.549  | 118  | 41  | 114  | 36  | 11  | 4  |
| PA | Trairão                    | 19.344  | 73   | 26  | 70   | 22  | 7   | 3  |
| PA | Tucumã                     | 40.661  | 152  | 53  | 147  | 46  | 14  | 5  |
| PA | Tucuruí                    | 116.605 | 436  | 151 | 419  | 132 | 39  | 14 |
| PA | Ulianópolis                | 62.286  | 233  | 81  | 224  | 71  | 21  | 8  |
| PA | Uruará                     | 45.395  | 170  | 59  | 164  | 52  | 16  | 6  |
| PA | Vigia                      | 54.650  | 205  | 71  | 197  | 62  | 19  | 7  |
| PA | Viseu                      | 62.093  | 233  | 81  | 223  | 71  | 21  | 8  |
| PA | Vitória do Xingu           | 15.421  | 58   | 20  | 56   | 18  | 6   | 2  |
| PA | Xinguara                   | 45.416  | 170  | 59  | 164  | 52  | 16  | 6  |
| AP | Serra do Navio             | 5.577   | 20   | 7   | 20   | 7   | 2   | 1  |
| AP | Amapá                      | 9.265   | 34   | 12  | 32   | 11  | 3   | 2  |
| AP | Pedra Branca do Amapari    | 17.625  | 64   | 22  | 61   | 20  | 6   | 3  |
| AP | Calçoene                   | 11.493  | 42   | 15  | 40   | 13  | 4   | 2  |
| AP | Cutias                     | 6.217   | 23   | 8   | 22   | 7   | 2   | 1  |
| AP | Ferreira Gomes             | 8.151   | 30   | 11  | 29   | 9   | 3   | 1  |
| AP | Itaubal                    | 5.730   | 21   | 8   | 20   | 7   | 2   | 1  |
| AP | Laranjal do Jari           | 52.302  | 188  | 65  | 181  | 57  | 17  | 6  |
| AP | Macapá                     | 522.357 | 1873 | 649 | 1800 | 565 | 167 | 60 |
| AP | Mazagão                    | 22.468  | 81   | 28  | 78   | 25  | 8   | 3  |
| AP | Oiapoque                   | 28.534  | 103  | 36  | 99   | 31  | 10  | 4  |
| AP | Porto Grande               | 22.927  | 83   | 29  | 79   | 25  | 8   | 3  |
| AP | Pracuúba                   | 5.370   | 20   | 7   | 19   | 6   | 2   | 1  |
| AP | Santana                    | 124.808 | 448  | 155 | 430  | 135 | 40  | 15 |
| AP | Tartarugalzinho            | 18.217  | 66   | 23  | 63   | 20  | 6   | 3  |
| AP | Vitória do Jari            | 16.572  | 60   | 21  | 58   | 18  | 6   | 2  |
| TO | Abreulândia                | 2.609   | 11   | 4   | 10   | 4   | 1   | 1  |
| TO | Aguiarnópolis              | 7.049   | 28   | 10  | 27   | 9   | 3   | 1  |
| TO | Aliança do Tocantins       | 5.303   | 21   | 8   | 20   | 7   | 2   | 1  |
| TO | Almas                      | 6.905   | 27   | 10  | 26   | 9   | 3   | 1  |
| TO | Alvorada                   | 8.381   | 33   | 12  | 32   | 10  | 3   | 2  |
| TO | Ananás                     | 9.435   | 37   | 13  | 36   | 11  | 4   | 2  |
| TO | Angico                     | 3.475   | 14   | 5   | 13   | 5   | 2   | 1  |
| TO | Aparecida do Rio Negro     | 4.901   | 19   | 7   | 19   | 6   | 2   | 1  |
| TO | Aragominas                 | 5.705   | 23   | 8   | 22   | 7   | 2   | 1  |
| TO | Araguacema                 | 7.223   | 28   | 10  | 27   | 9   | 3   | 1  |
| TO | Araguaçu                   | 8.418   | 33   | 12  | 32   | 10  | 3   | 2  |
| TO | Araguaína                  | 186.245 | 720  | 250 | 691  | 217 | 64  | 23 |
| TO | Araguanã                   | 5.856   | 23   | 8   | 22   | 7   | 3   | 1  |
| TO | Araguatins                 | 36.573  | 142  | 49  | 136  | 43  | 13  | 5  |
| TO | Arapoema                   | 6.590   | 26   | 9   | 25   | 8   | 3   | 1  |
| TO | Arraias                    | 10.502  | 41   | 15  | 39   | 13  | 4   | 2  |
| TO | Augustinópolis             | 18.870  | 73   | 26  | 71   | 22  | 7   | 3  |

|    |                           |        |     |     |     |     |    |    |
|----|---------------------------|--------|-----|-----|-----|-----|----|----|
| TO | Aurora do Tocantins       | 3.809  | 15  | 6   | 15  | 5   | 2  | 1  |
| TO | Axixá do Tocantins        | 9.817  | 38  | 14  | 37  | 12  | 4  | 2  |
| TO | Babaçulândia              | 10.668 | 42  | 15  | 40  | 13  | 4  | 2  |
| TO | Bandeirantes do Tocantins | 3.631  | 15  | 5   | 14  | 5   | 2  | 1  |
| TO | Barra do Ouro             | 4.673  | 19  | 7   | 18  | 6   | 2  | 1  |
| TO | Barrolândia               | 5.669  | 22  | 8   | 22  | 7   | 2  | 1  |
| TO | Bernardo Sayão            | 4.439  | 18  | 6   | 17  | 6   | 2  | 1  |
| TO | Bom Jesus do Tocantins    | 5.120  | 20  | 7   | 19  | 6   | 2  | 1  |
| TO | Brasilândia do Tocantins  | 2.221  | 9   | 3   | 9   | 3   | 1  | 1  |
| TO | Brejinho de Nazaré        | 5.540  | 22  | 8   | 21  | 7   | 2  | 1  |
| TO | Buriti do Tocantins       | 11.644 | 45  | 16  | 44  | 14  | 4  | 2  |
| TO | Cachoeirinha              | 2.293  | 9   | 4   | 9   | 3   | 1  | 1  |
| TO | Campos Lindos             | 10.505 | 41  | 15  | 39  | 13  | 4  | 2  |
| TO | Cariri do Tocantins       | 4.499  | 18  | 7   | 17  | 6   | 2  | 1  |
| TO | Carmolândia               | 2.627  | 11  | 4   | 10  | 4   | 1  | 1  |
| TO | Carrasco Bonito           | 4.165  | 17  | 6   | 16  | 5   | 2  | 1  |
| TO | Caseara                   | 5.514  | 22  | 8   | 21  | 7   | 2  | 1  |
| TO | Centenário                | 2.966  | 12  | 4   | 12  | 4   | 2  | 1  |
| TO | Chapada de Areia          | 1.415  | 6   | 2   | 6   | 2   | 1  | 1  |
| TO | Chapada da Natividade     | 3.330  | 13  | 5   | 13  | 4   | 2  | 1  |
| TO | Colinas do Tocantins      | 36.271 | 141 | 49  | 135 | 43  | 13 | 5  |
| TO | Combinado                 | 4.870  | 19  | 7   | 19  | 6   | 2  | 1  |
| TO | Conceição do Tocantins    | 4.070  | 16  | 6   | 16  | 5   | 2  | 1  |
| TO | Couto Magalhães           | 5.690  | 22  | 8   | 22  | 7   | 2  | 1  |
| TO | Cristalândia              | 7.268  | 29  | 10  | 27  | 9   | 3  | 1  |
| TO | Crixás do Tocantins       | 1.749  | 7   | 3   | 7   | 3   | 1  | 1  |
| TO | Darcinópolis              | 6.250  | 25  | 9   | 24  | 8   | 3  | 1  |
| TO | Dianópolis                | 22.704 | 88  | 31  | 85  | 27  | 8  | 3  |
| TO | Divinópolis do Tocantins  | 6.986  | 27  | 10  | 26  | 9   | 3  | 1  |
| TO | Dois Irmãos do Tocantins  | 7.173  | 28  | 10  | 27  | 9   | 3  | 1  |
| TO | Dueré                     | 4.686  | 19  | 7   | 18  | 6   | 2  | 1  |
| TO | Esperantina               | 11.280 | 44  | 16  | 42  | 14  | 4  | 2  |
| TO | Fátima                    | 3.824  | 15  | 6   | 15  | 5   | 2  | 1  |
| TO | Figueirópolis             | 5.222  | 21  | 7   | 20  | 7   | 2  | 1  |
| TO | Filadélfia                | 8.892  | 35  | 12  | 33  | 11  | 4  | 2  |
| TO | Formoso do Araguaia       | 18.358 | 71  | 25  | 69  | 22  | 7  | 3  |
| TO | Tabocão                   | 2.615  | 11  | 4   | 10  | 4   | 1  | 1  |
| TO | Goianorte                 | 5.136  | 20  | 7   | 20  | 6   | 2  | 1  |
| TO | Goiatins                  | 13.169 | 51  | 18  | 49  | 16  | 5  | 2  |
| TO | Guaraí                    | 26.403 | 102 | 36  | 98  | 31  | 10 | 4  |
| TO | Gurupi                    | 88.428 | 342 | 119 | 329 | 103 | 31 | 11 |
| TO | Ipueiras                  | 2.088  | 9   | 3   | 8   | 3   | 1  | 1  |
| TO | Itacajá                   | 7.471  | 29  | 10  | 28  | 9   | 3  | 1  |
| TO | Itaguatins                | 5.801  | 23  | 8   | 22  | 7   | 2  | 1  |
| TO | Itapiratins               | 3.814  | 15  | 6   | 15  | 5   | 2  | 1  |
| TO | Itaporã do Tocantins      | 2.412  | 10  | 4   | 9   | 3   | 1  | 1  |
| TO | Jáú do Tocantins          | 3.906  | 16  | 6   | 15  | 5   | 2  | 1  |
| TO | Juarina                   | 2.174  | 9   | 3   | 9   | 3   | 1  | 1  |
| TO | Lagoa da Confusão         | 13.989 | 55  | 19  | 52  | 17  | 5  | 2  |
| TO | Lagoa do Tocantins        | 4.470  | 18  | 6   | 17  | 6   | 2  | 1  |
| TO | Lajeado                   | 3.199  | 13  | 5   | 12  | 4   | 2  | 1  |
| TO | Lavandeira                | 1.984  | 8   | 3   | 8   | 3   | 1  | 1  |
| TO | Lizarda                   | 3.727  | 15  | 5   | 14  | 5   | 2  | 1  |
| TO | Luzinópolis               | 3.200  | 13  | 5   | 12  | 4   | 2  | 1  |
| TO | Marianópolis do Tocantins | 5.332  | 21  | 8   | 20  | 7   | 2  | 1  |
| TO | Mateiros                  | 2.773  | 11  | 4   | 11  | 4   | 1  | 1  |
| TO | Maurilândia do Tocantins  | 3.470  | 14  | 5   | 13  | 5   | 2  | 1  |
| TO | Miracema do Tocantins     | 17.628 | 69  | 24  | 66  | 21  | 7  | 3  |
| TO | Miranorte                 | 13.551 | 53  | 19  | 51  | 16  | 5  | 2  |
| TO | Monte do Carmo            | 8.182  | 32  | 11  | 31  | 10  | 3  | 2  |
| TO | Monte Santo do Tocantins  | 2.311  | 9   | 4   | 9   | 3   | 1  | 1  |
| TO | Palmeiras do Tocantins    | 6.830  | 27  | 10  | 26  | 8   | 3  | 1  |
| TO | Muricilândia              | 3.623  | 14  | 5   | 14  | 5   | 2  | 1  |
| TO | Natividade                | 9.256  | 36  | 13  | 35  | 11  | 4  | 2  |
| TO | Nazaré                    | 3.772  | 15  | 6   | 14  | 5   | 2  | 1  |
| TO | Nova Olinda               | 12.014 | 47  | 17  | 45  | 14  | 5  | 2  |

|    |                              |         |      |     |      |     |     |    |
|----|------------------------------|---------|------|-----|------|-----|-----|----|
| TO | Nova Rosalândia              | 4.348   | 17   | 6   | 17   | 6   | 2   | 1  |
| TO | Novo Acordo                  | 4.450   | 18   | 6   | 17   | 6   | 2   | 1  |
| TO | Novo Alegre                  | 2.332   | 10   | 4   | 9    | 3   | 1   | 1  |
| TO | Novo Jardim                  | 2.768   | 11   | 4   | 11   | 4   | 1   | 1  |
| TO | Oliveira de Fátima           | 1.124   | 5    | 2   | 5    | 2   | 1   | 1  |
| TO | Palmeirante                  | 6.234   | 25   | 9   | 24   | 8   | 3   | 1  |
| TO | Palmeirópolis                | 7.694   | 30   | 11  | 29   | 9   | 3   | 1  |
| TO | Paraíso do Tocantins         | 52.521  | 203  | 71  | 195  | 62  | 19  | 7  |
| TO | Paraná                       | 10.426  | 41   | 14  | 39   | 13  | 4   | 2  |
| TO | Pau D'Arco                   | 4.885   | 19   | 7   | 19   | 6   | 2   | 1  |
| TO | Pedro Afonso                 | 13.964  | 54   | 19  | 52   | 17  | 5   | 2  |
| TO | Peixe                        | 11.996  | 47   | 17  | 45   | 14  | 5   | 2  |
| TO | Pequizeiro                   | 5.546   | 22   | 8   | 21   | 7   | 2   | 1  |
| TO | Colméia                      | 8.078   | 32   | 11  | 30   | 10  | 3   | 1  |
| TO | Pindorama do Tocantins       | 4.414   | 18   | 6   | 17   | 6   | 2   | 1  |
| TO | Piraquê                      | 3.038   | 12   | 5   | 12   | 4   | 2   | 1  |
| TO | Pium                         | 7.830   | 31   | 11  | 30   | 10  | 3   | 1  |
| TO | Ponte Alta do Bom Jesus      | 4.586   | 18   | 7   | 18   | 6   | 2   | 1  |
| TO | Ponte Alta do Tocantins      | 8.192   | 32   | 11  | 31   | 10  | 3   | 2  |
| TO | Porto Alegre do Tocantins    | 3.200   | 13   | 5   | 12   | 4   | 2   | 1  |
| TO | Porto Nacional               | 53.618  | 208  | 72  | 199  | 63  | 19  | 7  |
| TO | Praia Norte                  | 8.563   | 34   | 12  | 32   | 10  | 3   | 2  |
| TO | Presidente Kennedy           | 3.668   | 15   | 5   | 14   | 5   | 2   | 1  |
| TO | Pugmil                       | 2.746   | 11   | 4   | 11   | 4   | 1   | 1  |
| TO | Recursolândia                | 4.389   | 17   | 6   | 17   | 6   | 2   | 1  |
| TO | Riachinho                    | 4.723   | 19   | 7   | 18   | 6   | 2   | 1  |
| TO | Rio da Conceição             | 2.211   | 9    | 3   | 9    | 3   | 1   | 1  |
| TO | Rio dos Bois                 | 2.879   | 12   | 4   | 11   | 4   | 1   | 1  |
| TO | Rio Sono                     | 6.498   | 26   | 9   | 25   | 8   | 3   | 1  |
| TO | Sampaio                      | 4.876   | 19   | 7   | 19   | 6   | 2   | 1  |
| TO | Sandolândia                  | 3.371   | 14   | 5   | 13   | 4   | 2   | 1  |
| TO | Santa Fé do Araguaia         | 7.678   | 30   | 11  | 29   | 9   | 3   | 1  |
| TO | Santa Maria do Tocantins     | 3.537   | 14   | 5   | 14   | 5   | 2   | 1  |
| TO | Santa Rita do Tocantins      | 2.407   | 10   | 4   | 9    | 3   | 1   | 1  |
| TO | Santa Rosa do Tocantins      | 4.864   | 19   | 7   | 19   | 6   | 2   | 1  |
| TO | Santa Tereza do Tocantins    | 2.928   | 12   | 4   | 11   | 4   | 2   | 1  |
| TO | Santa Terezinha do Tocantins | 2.530   | 10   | 4   | 10   | 3   | 1   | 1  |
| TO | São Bento do Tocantins       | 5.457   | 22   | 8   | 21   | 7   | 2   | 1  |
| TO | São Félix do Tocantins       | 1.610   | 7    | 3   | 6    | 2   | 1   | 1  |
| TO | São Miguel do Tocantins      | 12.445  | 49   | 17  | 47   | 15  | 5   | 2  |
| TO | São Salvador do Tocantins    | 3.106   | 12   | 5   | 12   | 4   | 2   | 1  |
| TO | São Sebastião do Tocantins   | 4.898   | 19   | 7   | 19   | 6   | 2   | 1  |
| TO | São Valério                  | 3.848   | 15   | 6   | 15   | 5   | 2   | 1  |
| TO | Silvanópolis                 | 5.452   | 22   | 8   | 21   | 7   | 2   | 1  |
| TO | Sítio Novo do Tocantins      | 8.965   | 35   | 12  | 34   | 11  | 4   | 2  |
| TO | Sucupira                     | 2.007   | 8    | 3   | 8    | 3   | 1   | 1  |
| TO | Taguatinga                   | 16.966  | 66   | 23  | 63   | 20  | 6   | 3  |
| TO | Taipas do Tocantins          | 2.183   | 9    | 3   | 9    | 3   | 1   | 1  |
| TO | Talismã                      | 2.831   | 11   | 4   | 11   | 4   | 1   | 1  |
| TO | Palmas                       | 313.349 | 1211 | 419 | 1163 | 365 | 108 | 39 |
| TO | Tocantínia                   | 7.688   | 30   | 11  | 29   | 9   | 3   | 1  |
| TO | Tocantinópolis               | 22.820  | 89   | 31  | 85   | 27  | 8   | 3  |
| TO | Tupirama                     | 1.952   | 8    | 3   | 8    | 3   | 1   | 1  |
| TO | Tupiratins                   | 2.785   | 11   | 4   | 11   | 4   | 1   | 1  |
| TO | Wanderlândia                 | 11.783  | 46   | 16  | 44   | 14  | 5   | 2  |
| TO | Xambioá                      | 11.500  | 45   | 16  | 43   | 14  | 4   | 2  |
| MA | Açailândia                   | 113.783 | 425  | 147 | 408  | 128 | 38  | 14 |
| MA | Afonso Cunha                 | 6.631   | 25   | 9   | 24   | 8   | 3   | 1  |
| MA | Água Doce do Maranhão        | 12.731  | 48   | 17  | 46   | 15  | 5   | 2  |
| MA | Alcântara                    | 22.126  | 83   | 29  | 80   | 25  | 8   | 3  |
| MA | Aldeias Altas                | 26.979  | 101  | 35  | 97   | 31  | 9   | 4  |
| MA | Altamira do Maranhão         | 8.250   | 31   | 11  | 30   | 10  | 3   | 1  |
| MA | Alto Alegre do Maranhão      | 28.066  | 105  | 37  | 101  | 32  | 10  | 4  |
| MA | Alto Alegre do Pindaré       | 31.967  | 120  | 42  | 115  | 36  | 11  | 4  |
| MA | Alto Parnaíba                | 11.233  | 42   | 15  | 41   | 13  | 4   | 2  |
| MA | Amapá do Maranhão            | 7.047   | 27   | 10  | 26   | 8   | 3   | 1  |

|    |                         |         |     |     |     |     |    |    |
|----|-------------------------|---------|-----|-----|-----|-----|----|----|
| MA | Amarante do Maranhão    | 42.017  | 157 | 55  | 151 | 48  | 14 | 5  |
| MA | Anajatuba               | 27.170  | 102 | 36  | 98  | 31  | 9  | 4  |
| MA | Anapurus                | 16.054  | 60  | 21  | 58  | 19  | 6  | 2  |
| MA | Apicum-Açu              | 17.582  | 66  | 23  | 63  | 20  | 6  | 3  |
| MA | Araguanã                | 15.675  | 59  | 21  | 57  | 18  | 6  | 2  |
| MA | Araioses                | 47.095  | 176 | 61  | 169 | 53  | 16 | 6  |
| MA | Arame                   | 32.825  | 123 | 43  | 118 | 37  | 11 | 4  |
| MA | Arari                   | 30.014  | 112 | 39  | 108 | 34  | 10 | 4  |
| MA | Axixá                   | 12.234  | 46  | 16  | 44  | 14  | 5  | 2  |
| MA | Bacabal                 | 105.094 | 392 | 136 | 377 | 119 | 35 | 13 |
| MA | Bacabeira               | 17.446  | 66  | 23  | 63  | 20  | 6  | 3  |
| MA | Bacuri                  | 18.726  | 70  | 25  | 68  | 22  | 7  | 3  |
| MA | Bacurituba              | 5.696   | 22  | 8   | 21  | 7   | 2  | 1  |
| MA | Balsas                  | 96.951  | 362 | 126 | 348 | 110 | 33 | 12 |
| MA | Barão de Grajaú         | 19.026  | 71  | 25  | 69  | 22  | 7  | 3  |
| MA | Barra do Corda          | 88.895  | 332 | 115 | 319 | 100 | 30 | 11 |
| MA | Barreirinhas            | 63.891  | 239 | 83  | 229 | 72  | 22 | 8  |
| MA | Belágua                 | 7.586   | 29  | 10  | 28  | 9   | 3  | 1  |
| MA | Bela Vista do Maranhão  | 11.347  | 43  | 15  | 41  | 13  | 4  | 2  |
| MA | Benedito Leite          | 5.643   | 22  | 8   | 21  | 7   | 2  | 1  |
| MA | Bequimão                | 21.317  | 80  | 28  | 77  | 24  | 8  | 3  |
| MA | Bernardo do Mearim      | 6.102   | 23  | 8   | 22  | 7   | 3  | 1  |
| MA | Boa Vista do Gurupi     | 8.494   | 32  | 11  | 31  | 10  | 3  | 2  |
| MA | Bom Jardim              | 42.010  | 157 | 55  | 151 | 48  | 14 | 5  |
| MA | Bom Jesus das Selvas    | 35.095  | 131 | 46  | 126 | 40  | 12 | 5  |
| MA | Bom Lugar               | 16.578  | 62  | 22  | 60  | 19  | 6  | 2  |
| MA | Brejo                   | 36.900  | 138 | 48  | 133 | 42  | 13 | 5  |
| MA | Brejo de Areia          | 8.841   | 33  | 12  | 32  | 10  | 3  | 2  |
| MA | Buriti                  | 28.916  | 108 | 38  | 104 | 33  | 10 | 4  |
| MA | Buriti Bravo            | 23.993  | 90  | 31  | 86  | 27  | 8  | 3  |
| MA | Buriticupu              | 73.595  | 275 | 95  | 264 | 83  | 25 | 9  |
| MA | Buritirana              | 15.503  | 58  | 21  | 56  | 18  | 6  | 2  |
| MA | Cachoeira Grande        | 9.524   | 36  | 13  | 35  | 11  | 4  | 2  |
| MA | Cajapió                 | 11.255  | 42  | 15  | 41  | 13  | 4  | 2  |
| MA | Cajari                  | 19.521  | 73  | 26  | 70  | 22  | 7  | 3  |
| MA | Campestre do Maranhão   | 14.530  | 55  | 19  | 53  | 17  | 5  | 2  |
| MA | Cândido Mendes          | 20.376  | 76  | 27  | 73  | 23  | 7  | 3  |
| MA | Cantanhede              | 22.236  | 83  | 29  | 80  | 26  | 8  | 3  |
| MA | Capinzal do Norte       | 10.937  | 41  | 15  | 40  | 13  | 4  | 2  |
| MA | Carolina                | 24.151  | 91  | 32  | 87  | 28  | 8  | 3  |
| MA | Carutapera              | 24.095  | 90  | 32  | 87  | 28  | 8  | 3  |
| MA | Caxias                  | 166.159 | 620 | 215 | 596 | 187 | 56 | 20 |
| MA | Cedral                  | 10.711  | 40  | 14  | 39  | 13  | 4  | 2  |
| MA | Central do Maranhão     | 8.806   | 33  | 12  | 32  | 10  | 3  | 2  |
| MA | Centro do Guilherme     | 13.876  | 52  | 18  | 50  | 16  | 5  | 2  |
| MA | Centro Novo do Maranhão | 22.056  | 83  | 29  | 79  | 25  | 8  | 3  |
| MA | Chapadinha              | 80.705  | 301 | 105 | 290 | 91  | 27 | 10 |
| MA | Cidelândia              | 14.855  | 56  | 20  | 54  | 17  | 5  | 2  |
| MA | Codó                    | 123.368 | 460 | 160 | 442 | 139 | 41 | 15 |
| MA | Coelho Neto             | 49.804  | 186 | 65  | 179 | 57  | 17 | 6  |
| MA | Colinas                 | 41.443  | 155 | 54  | 149 | 47  | 14 | 5  |
| MA | Conceição do Lago-Açu   | 16.559  | 62  | 22  | 60  | 19  | 6  | 2  |
| MA | Coroatá                 | 65.788  | 246 | 85  | 236 | 74  | 22 | 8  |
| MA | Cururupu                | 32.559  | 122 | 43  | 117 | 37  | 11 | 4  |
| MA | Davinópolis             | 12.923  | 49  | 17  | 47  | 15  | 5  | 2  |
| MA | Dom Pedro               | 23.393  | 88  | 31  | 84  | 27  | 8  | 3  |
| MA | Duque Bacelar           | 11.451  | 43  | 15  | 42  | 13  | 4  | 2  |
| MA | Esperantinópolis        | 16.971  | 64  | 22  | 61  | 20  | 6  | 3  |
| MA | Estreito                | 43.097  | 161 | 56  | 155 | 49  | 15 | 6  |
| MA | Feira Nova do Maranhão  | 8.506   | 32  | 11  | 31  | 10  | 3  | 2  |
| MA | Fernando Falcão         | 10.559  | 40  | 14  | 38  | 12  | 4  | 2  |
| MA | Formosa da Serra Negra  | 19.425  | 73  | 26  | 70  | 22  | 7  | 3  |
| MA | Fortaleza dos Nogueiras | 12.662  | 48  | 17  | 46  | 15  | 5  | 2  |
| MA | Fortuna                 | 17.812  | 67  | 23  | 64  | 21  | 6  | 3  |
| MA | Godofredo Viana         | 12.104  | 46  | 16  | 44  | 14  | 5  | 2  |
| MA | Gonçalves Dias          | 17.953  | 67  | 24  | 65  | 21  | 6  | 3  |



|    |                           |         |     |     |     |     |    |    |
|----|---------------------------|---------|-----|-----|-----|-----|----|----|
| MA | Governador Archer         | 10.931  | 41  | 15  | 40  | 13  | 4  | 2  |
| MA | Governador Edison Lobão   | 18.740  | 70  | 25  | 68  | 22  | 7  | 3  |
| MA | Governador Eugênio Barros | 14.703  | 55  | 19  | 53  | 17  | 5  | 2  |
| MA | Governador Luiz Rocha     | 7.878   | 30  | 11  | 29  | 9   | 3  | 1  |
| MA | Governador Newton Bello   | 10.121  | 38  | 14  | 37  | 12  | 4  | 2  |
| MA | Governador Nunes Freire   | 25.502  | 96  | 33  | 92  | 29  | 9  | 4  |
| MA | Graça Aranha              | 6.261   | 24  | 9   | 23  | 8   | 3  | 1  |
| MA | Grajaú                    | 70.692  | 264 | 92  | 254 | 80  | 24 | 9  |
| MA | Guimarães                 | 11.966  | 45  | 16  | 43  | 14  | 4  | 2  |
| MA | Humberto de Campos        | 29.143  | 109 | 38  | 105 | 33  | 10 | 4  |
| MA | Icatu                     | 27.423  | 103 | 36  | 99  | 31  | 10 | 4  |
| MA | Igarapé do Meio           | 14.470  | 54  | 19  | 52  | 17  | 5  | 2  |
| MA | Igarapé Grande            | 11.453  | 43  | 15  | 42  | 13  | 4  | 2  |
| MA | Imperatriz                | 259.980 | 970 | 336 | 932 | 293 | 87 | 31 |
| MA | Itaipava do Grajaú        | 16.158  | 61  | 21  | 58  | 19  | 6  | 2  |
| MA | Itapecuru Mirim           | 69.233  | 259 | 90  | 248 | 78  | 23 | 9  |
| MA | Itinga do Maranhão        | 26.134  | 98  | 34  | 94  | 30  | 9  | 4  |
| MA | Jatobá                    | 10.464  | 40  | 14  | 38  | 12  | 4  | 2  |
| MA | Jenipapo dos Vieiras      | 17.123  | 64  | 23  | 62  | 20  | 6  | 3  |
| MA | João Lisboa               | 23.677  | 89  | 31  | 85  | 27  | 8  | 3  |
| MA | Joselândia                | 16.228  | 61  | 21  | 59  | 19  | 6  | 2  |
| MA | Junco do Maranhão         | 4.334   | 17  | 6   | 16  | 5   | 2  | 1  |
| MA | Lago da Pedra             | 50.959  | 190 | 66  | 183 | 58  | 17 | 7  |
| MA | Lago do Junco             | 10.900  | 41  | 15  | 40  | 13  | 4  | 2  |
| MA | Lago Verde                | 16.369  | 62  | 22  | 59  | 19  | 6  | 2  |
| MA | Lagoa do Mato             | 11.280  | 43  | 15  | 41  | 13  | 4  | 2  |
| MA | Lagoa dos Rodrigues       | 8.841   | 33  | 12  | 32  | 10  | 3  | 2  |
| MA | Lagoa Grande do Maranhão  | 11.534  | 43  | 15  | 42  | 13  | 4  | 2  |
| MA | Lajeado Novo              | 7.653   | 29  | 10  | 28  | 9   | 3  | 1  |
| MA | Lima Campos               | 11.943  | 45  | 16  | 43  | 14  | 4  | 2  |
| MA | Loreto                    | 12.271  | 46  | 16  | 44  | 14  | 5  | 2  |
| MA | Luís Domingues            | 7.016   | 27  | 10  | 26  | 8   | 3  | 1  |
| MA | Magalhães de Almeida      | 20.228  | 76  | 27  | 73  | 23  | 7  | 3  |
| MA | Maracaçumé                | 21.773  | 82  | 29  | 78  | 25  | 8  | 3  |
| MA | Marajá do Sena            | 7.757   | 29  | 11  | 28  | 9   | 3  | 1  |
| MA | Maranhãozinho             | 16.754  | 63  | 22  | 60  | 19  | 6  | 2  |
| MA | Mata Roma                 | 17.122  | 64  | 23  | 62  | 20  | 6  | 3  |
| MA | Matinha                   | 23.591  | 88  | 31  | 85  | 27  | 8  | 3  |
| MA | Matões                    | 34.099  | 128 | 45  | 123 | 39  | 12 | 5  |
| MA | Matões do Norte           | 17.316  | 65  | 23  | 63  | 20  | 6  | 3  |
| MA | Milagres do Maranhão      | 8.502   | 32  | 11  | 31  | 10  | 3  | 2  |
| MA | Mirador                   | 21.045  | 79  | 28  | 76  | 24  | 7  | 3  |
| MA | Miranda do Norte          | 29.121  | 109 | 38  | 105 | 33  | 10 | 4  |
| MA | Mirinzal                  | 15.059  | 57  | 20  | 54  | 17  | 5  | 2  |
| MA | Monção                    | 33.888  | 127 | 44  | 122 | 39  | 12 | 5  |
| MA | Montes Altos              | 9.064   | 34  | 12  | 33  | 11  | 4  | 2  |
| MA | Morros                    | 19.708  | 74  | 26  | 71  | 23  | 7  | 3  |
| MA | Nina Rodrigues            | 14.826  | 56  | 20  | 54  | 17  | 5  | 2  |
| MA | Nova Colinas              | 5.469   | 21  | 8   | 20  | 7   | 2  | 1  |
| MA | Nova Iorque               | 4.682   | 18  | 7   | 17  | 6   | 2  | 1  |
| MA | Nova Olinda do Maranhão   | 21.228  | 80  | 28  | 77  | 24  | 8  | 3  |
| MA | Olho d'Água das Cunhãs    | 19.616  | 74  | 26  | 71  | 23  | 7  | 3  |
| MA | Olinda Nova do Maranhão   | 14.968  | 56  | 20  | 54  | 17  | 5  | 2  |
| MA | Paço do Lumiar            | 125.265 | 467 | 162 | 449 | 141 | 42 | 15 |
| MA | Palmeirândia              | 19.840  | 74  | 26  | 72  | 23  | 7  | 3  |
| MA | Paraibano                 | 21.571  | 81  | 28  | 78  | 25  | 8  | 3  |
| MA | Parnarama                 | 35.108  | 131 | 46  | 126 | 40  | 12 | 5  |
| MA | Passagem Franca           | 19.253  | 72  | 25  | 69  | 22  | 7  | 3  |
| MA | Pastos Bons               | 19.693  | 74  | 26  | 71  | 23  | 7  | 3  |
| MA | Paulino Neves             | 16.295  | 61  | 22  | 59  | 19  | 6  | 2  |
| MA | Paulo Ramos               | 21.092  | 79  | 28  | 76  | 24  | 7  | 3  |
| MA | Pedreiras                 | 39.153  | 146 | 51  | 141 | 45  | 13 | 5  |
| MA | Pedro do Rosário          | 25.560  | 96  | 33  | 92  | 29  | 9  | 4  |
| MA | Penalva                   | 38.987  | 146 | 51  | 140 | 44  | 13 | 5  |
| MA | Peri Mirim                | 14.371  | 54  | 19  | 52  | 17  | 5  | 2  |
| MA | Peritoró                  | 23.530  | 88  | 31  | 85  | 27  | 8  | 3  |

|    |                              |           |      |      |      |      |     |     |
|----|------------------------------|-----------|------|------|------|------|-----|-----|
| MA | Pindaré-Mirim                | 33.186    | 124  | 43   | 119  | 38   | 11  | 4   |
| MA | Pinheiro                     | 84.160    | 314  | 109  | 302  | 95   | 28  | 11  |
| MA | Pio XII                      | 21.274    | 80   | 28   | 77   | 24   | 8   | 3   |
| MA | Pirapemas                    | 18.814    | 71   | 25   | 68   | 22   | 7   | 3   |
| MA | Poção de Pedras              | 17.321    | 65   | 23   | 63   | 20   | 6   | 3   |
| MA | Porto Franco                 | 24.294    | 91   | 32   | 88   | 28   | 9   | 3   |
| MA | Porto Rico do Maranhão       | 5.936     | 23   | 8    | 22   | 7    | 2   | 1   |
| MA | Presidente Dutra             | 48.264    | 180  | 63   | 173  | 55   | 16  | 6   |
| MA | Presidente Juscelino         | 12.939    | 49   | 17   | 47   | 15   | 5   | 2   |
| MA | Presidente Médici            | 7.124     | 27   | 10   | 26   | 9    | 3   | 1   |
| MA | Presidente Sarney            | 19.217    | 72   | 25   | 69   | 22   | 7   | 3   |
| MA | Presidente Vargas            | 11.328    | 43   | 15   | 41   | 13   | 4   | 2   |
| MA | Primeira Cruz                | 15.545    | 58   | 21   | 56   | 18   | 6   | 2   |
| MA | Raposa                       | 31.586    | 118  | 41   | 114  | 36   | 11  | 4   |
| MA | Riachão                      | 20.288    | 76   | 27   | 73   | 23   | 7   | 3   |
| MA | Ribamar Fiquene              | 7.859     | 30   | 11   | 29   | 9    | 3   | 1   |
| MA | Rosário                      | 43.243    | 162  | 56   | 155  | 49   | 15  | 6   |
| MA | Sambaíba                     | 5.686     | 22   | 8    | 21   | 7    | 2   | 1   |
| MA | Santa Filomena do Maranhão   | 7.878     | 30   | 11   | 29   | 9    | 3   | 1   |
| MA | Santa Helena                 | 42.829    | 160  | 56   | 154  | 49   | 15  | 6   |
| MA | Santa Inês                   | 89.927    | 336  | 117  | 323  | 102  | 30  | 11  |
| MA | Santa Luzia                  | 73.105    | 273  | 95   | 262  | 83   | 25  | 9   |
| MA | Santa Luzia do Paruá         | 25.487    | 95   | 33   | 92   | 29   | 9   | 4   |
| MA | Santa Quitéria do Maranhão   | 25.884    | 97   | 34   | 93   | 30   | 9   | 4   |
| MA | Santa Rita                   | 38.732    | 145  | 50   | 139  | 44   | 13  | 5   |
| MA | Santana do Maranhão          | 13.704    | 52   | 18   | 50   | 16   | 5   | 2   |
| MA | Santo Amaro do Maranhão      | 16.219    | 61   | 21   | 59   | 19   | 6   | 2   |
| MA | Santo Antônio dos Lopes      | 14.516    | 55   | 19   | 52   | 17   | 5   | 2   |
| MA | São Benedito do Rio Preto    | 18.769    | 70   | 25   | 68   | 22   | 7   | 3   |
| MA | São Bento                    | 45.989    | 172  | 60   | 165  | 52   | 16  | 6   |
| MA | São Bernardo                 | 28.825    | 108  | 38   | 104  | 33   | 10  | 4   |
| MA | São Domingos do Azeitão      | 7.448     | 28   | 10   | 27   | 9    | 3   | 1   |
| MA | São Domingos do Maranhão     | 34.391    | 129  | 45   | 124  | 39   | 12  | 5   |
| MA | São Félix de Balsas          | 4.540     | 17   | 6    | 17   | 6    | 2   | 1   |
| MA | São Francisco do Brejão      | 12.082    | 46   | 16   | 44   | 14   | 5   | 2   |
| MA | São Francisco do Maranhão    | 12.226    | 46   | 16   | 44   | 14   | 5   | 2   |
| MA | São João Batista             | 20.736    | 78   | 27   | 75   | 24   | 7   | 3   |
| MA | São João do Carú             | 15.768    | 59   | 21   | 57   | 18   | 6   | 2   |
| MA | São João do Paraíso          | 11.207    | 42   | 15   | 41   | 13   | 4   | 2   |
| MA | São João do Soter            | 18.746    | 70   | 25   | 68   | 22   | 7   | 3   |
| MA | São João dos Patos           | 26.063    | 98   | 34   | 94   | 30   | 9   | 4   |
| MA | São José de Ribamar          | 180.345   | 673  | 233  | 646  | 203  | 60  | 22  |
| MA | São José dos Basílios        | 7.639     | 29   | 10   | 28   | 9    | 3   | 1   |
| MA | São Luís                     | 1.115.932 | 4160 | 1441 | 3997 | 1255 | 370 | 133 |
| MA | São Luís Gonzaga do Maranhão | 18.600    | 70   | 25   | 67   | 21   | 7   | 3   |
| MA | São Mateus do Maranhão       | 41.750    | 156  | 54   | 150  | 47   | 14  | 5   |
| MA | São Pedro da Água Branca     | 12.779    | 48   | 17   | 46   | 15   | 5   | 2   |
| MA | São Pedro dos Crentes        | 4.700     | 18   | 7    | 17   | 6    | 2   | 1   |
| MA | São Raimundo das Mangabé     | 19.090    | 72   | 25   | 69   | 22   | 7   | 3   |
| MA | São Raimundo do Doca Bezerra | 5.028     | 19   | 7    | 19   | 6    | 2   | 1   |
| MA | São Roberto                  | 6.856     | 26   | 9    | 25   | 8    | 3   | 1   |
| MA | São Vicente Ferrer           | 22.452    | 84   | 29   | 81   | 26   | 8   | 3   |
| MA | Satubinha                    | 14.274    | 54   | 19   | 52   | 17   | 5   | 2   |
| MA | Senador Alexandre Costa      | 11.285    | 43   | 15   | 41   | 13   | 4   | 2   |
| MA | Senador La Rocque            | 13.981    | 53   | 19   | 51   | 16   | 5   | 2   |
| MA | Serrano do Maranhão          | 10.343    | 39   | 14   | 38   | 12   | 4   | 2   |
| MA | Sítio Novo                   | 18.237    | 68   | 24   | 66   | 21   | 7   | 3   |
| MA | Sucupira do Norte            | 10.631    | 40   | 14   | 39   | 12   | 4   | 2   |
| MA | Sucupira do Riachão          | 5.692     | 22   | 8    | 21   | 7    | 2   | 1   |
| MA | Tasso Fragoso                | 8.642     | 33   | 12   | 31   | 10   | 3   | 2   |
| MA | Timbiras                     | 29.241    | 109  | 38   | 105  | 33   | 10  | 4   |
| MA | Timon                        | 171.317   | 639  | 222  | 614  | 193  | 57  | 21  |
| MA | Trizidela do Vale            | 22.223    | 83   | 29   | 80   | 25   | 8   | 3   |
| MA | Tufilândia                   | 5.868     | 22   | 8    | 22   | 7    | 2   | 1   |
| MA | Tuntum                       | 42.242    | 158  | 55   | 152  | 48   | 14  | 6   |
| MA | Turiáçu                      | 35.811    | 134  | 47   | 129  | 41   | 12  | 5   |

|    |                           |        |     |    |     |    |    |   |
|----|---------------------------|--------|-----|----|-----|----|----|---|
| MA | Turilândia                | 26.112 | 98  | 34 | 94  | 30 | 9  | 4 |
| MA | Tutóia                    | 59.927 | 224 | 78 | 215 | 68 | 20 | 8 |
| MA | Urbano Santos             | 33.791 | 126 | 44 | 122 | 38 | 12 | 5 |
| MA | Vargem Grande             | 57.813 | 216 | 75 | 208 | 66 | 20 | 7 |
| MA | Viana                     | 52.852 | 198 | 69 | 190 | 60 | 18 | 7 |
| MA | Vila Nova dos Martírios   | 13.800 | 52  | 18 | 50  | 16 | 5  | 2 |
| MA | Vitória do Mearim         | 32.956 | 123 | 43 | 119 | 38 | 11 | 4 |
| MA | Vitorino Freire           | 31.520 | 118 | 41 | 113 | 36 | 11 | 4 |
| MA | Zé Doca                   | 52.190 | 195 | 68 | 187 | 59 | 18 | 7 |
| PI | Acauã                     | 7.119  | 29  | 10 | 28  | 9  | 3  | 1 |
| PI | Agricolândia              | 5.123  | 21  | 8  | 20  | 7  | 2  | 1 |
| PI | Água Branca               | 17.525 | 70  | 25 | 67  | 21 | 7  | 3 |
| PI | Alagoinha do Piauí        | 7.678  | 31  | 11 | 30  | 10 | 3  | 1 |
| PI | Alegrete do Piauí         | 4.921  | 20  | 7  | 19  | 6  | 2  | 1 |
| PI | Alto Longá                | 14.371 | 57  | 20 | 55  | 18 | 6  | 2 |
| PI | Altos                     | 40.681 | 162 | 56 | 155 | 49 | 15 | 6 |
| PI | Alvorada do Gurguéia      | 5.469  | 22  | 8  | 21  | 7  | 2  | 1 |
| PI | Amarante                  | 17.609 | 70  | 25 | 68  | 22 | 7  | 3 |
| PI | Angical do Piauí          | 6.779  | 27  | 10 | 26  | 9  | 3  | 1 |
| PI | Anísio de Abreu           | 9.994  | 40  | 14 | 39  | 12 | 4  | 2 |
| PI | Antônio Almeida           | 3.175  | 13  | 5  | 13  | 4  | 2  | 1 |
| PI | Aroazes                   | 5.819  | 24  | 8  | 23  | 7  | 3  | 1 |
| PI | Aroeiras do Itaim         | 2.551  | 11  | 4  | 10  | 4  | 1  | 1 |
| PI | Arraial                   | 4.713  | 19  | 7  | 18  | 6  | 2  | 1 |
| PI | Assunção do Piauí         | 7.879  | 32  | 11 | 31  | 10 | 3  | 1 |
| PI | Avelino Lopes             | 11.361 | 46  | 16 | 44  | 14 | 4  | 2 |
| PI | Baixa Grande do Ribeiro   | 11.751 | 47  | 17 | 45  | 15 | 5  | 2 |
| PI | Barra D'Alcântara         | 3.953  | 16  | 6  | 16  | 5  | 2  | 1 |
| PI | Barras                    | 47.298 | 188 | 65 | 181 | 57 | 17 | 6 |
| PI | Barreiras do Piauí        | 3.356  | 14  | 5  | 13  | 5  | 2  | 1 |
| PI | Barro Duro                | 7.022  | 28  | 10 | 27  | 9  | 3  | 1 |
| PI | Batalha                   | 26.951 | 107 | 37 | 103 | 33 | 10 | 4 |
| PI | Bela Vista do Piauí       | 4.044  | 17  | 6  | 16  | 5  | 2  | 1 |
| PI | Belém do Piauí            | 3.607  | 15  | 5  | 14  | 5  | 2  | 1 |
| PI | Benedictinos              | 10.479 | 42  | 15 | 40  | 13 | 4  | 2 |
| PI | Bertolínia                | 5.512  | 22  | 8  | 21  | 7  | 2  | 1 |
| PI | Betânia do Piauí          | 6.214  | 25  | 9  | 24  | 8  | 3  | 1 |
| PI | Boa Hora                  | 6.848  | 28  | 10 | 27  | 9  | 3  | 1 |
| PI | Bocaina                   | 4.509  | 18  | 7  | 18  | 6  | 2  | 1 |
| PI | Bom Jesus                 | 25.584 | 102 | 36 | 98  | 31 | 10 | 4 |
| PI | Bom Princípio do Piauí    | 5.670  | 23  | 8  | 22  | 7  | 2  | 1 |
| PI | Bonfim do Piauí           | 5.700  | 23  | 8  | 22  | 7  | 3  | 1 |
| PI | Boqueirão do Piauí        | 6.443  | 26  | 9  | 25  | 8  | 3  | 1 |
| PI | Brasileira                | 8.364  | 34  | 12 | 32  | 11 | 3  | 2 |
| PI | Brejo do Piauí            | 3.824  | 16  | 6  | 15  | 5  | 2  | 1 |
| PI | Buriti dos Lopes          | 19.832 | 79  | 28 | 76  | 24 | 7  | 3 |
| PI | Buriti dos Montes         | 8.282  | 33  | 12 | 32  | 10 | 3  | 2 |
| PI | Cabeceiras do Piauí       | 10.671 | 43  | 15 | 41  | 13 | 4  | 2 |
| PI | Cajazeiras do Piauí       | 3.586  | 15  | 5  | 14  | 5  | 2  | 1 |
| PI | Cajueiro da Praia         | 7.704  | 31  | 11 | 30  | 10 | 3  | 1 |
| PI | Caldeirão Grande do Piauí | 5.786  | 23  | 8  | 23  | 7  | 3  | 1 |
| PI | Campinas do Piauí         | 5.628  | 23  | 8  | 22  | 7  | 2  | 1 |
| PI | Campo Alegre do Fidalgo   | 5.093  | 21  | 7  | 20  | 7  | 2  | 1 |
| PI | Campo Grande do Piauí     | 5.987  | 24  | 9  | 23  | 8  | 3  | 1 |
| PI | Campo Largo do Piauí      | 7.342  | 30  | 11 | 28  | 9  | 3  | 1 |
| PI | Campo Maior               | 46.950 | 187 | 65 | 179 | 57 | 17 | 6 |
| PI | Canavieira                | 3.938  | 16  | 6  | 15  | 5  | 2  | 1 |
| PI | Canto do Buriti           | 21.326 | 85  | 30 | 82  | 26 | 8  | 3 |
| PI | Capitão de Campos         | 11.471 | 46  | 16 | 44  | 14 | 5  | 2 |
| PI | Capitão Gervásio Oliveira | 4.127  | 17  | 6  | 16  | 5  | 2  | 1 |
| PI | Caracol                   | 11.009 | 44  | 16 | 42  | 14 | 4  | 2 |
| PI | Caraúbas do Piauí         | 5.910  | 24  | 9  | 23  | 8  | 3  | 1 |
| PI | Caridade do Piauí         | 5.102  | 21  | 8  | 20  | 7  | 2  | 1 |
| PI | Castelo do Piauí          | 19.716 | 79  | 28 | 76  | 24 | 7  | 3 |
| PI | Caxingó                   | 5.477  | 22  | 8  | 21  | 7  | 2  | 1 |
| PI | Cocal                     | 27.901 | 111 | 39 | 107 | 34 | 10 | 4 |

|    |                         |        |     |    |     |    |    |   |
|----|-------------------------|--------|-----|----|-----|----|----|---|
| PI | Cocal de Telha          | 4.908  | 20  | 7  | 19  | 6  | 2  | 1 |
| PI | Cocal dos Alves         | 6.180  | 25  | 9  | 24  | 8  | 3  | 1 |
| PI | Coivaras                | 4.044  | 17  | 6  | 16  | 5  | 2  | 1 |
| PI | Colônia do Gurguéia     | 6.545  | 26  | 9  | 25  | 8  | 3  | 1 |
| PI | Colônia do Piauí        | 7.665  | 31  | 11 | 30  | 10 | 3  | 1 |
| PI | Conceição do Canindé    | 4.811  | 20  | 7  | 19  | 6  | 2  | 1 |
| PI | Coronel José Dias       | 4.688  | 19  | 7  | 18  | 6  | 2  | 1 |
| PI | Corrente                | 26.771 | 107 | 37 | 102 | 33 | 10 | 4 |
| PI | Cristalândia do Piauí   | 8.350  | 34  | 12 | 32  | 10 | 3  | 2 |
| PI | Cristino Castro         | 10.464 | 42  | 15 | 40  | 13 | 4  | 2 |
| PI | Curimatá                | 11.461 | 46  | 16 | 44  | 14 | 5  | 2 |
| PI | Currais                 | 4.982  | 20  | 7  | 19  | 6  | 2  | 1 |
| PI | Curralinhos             | 4.475  | 18  | 7  | 18  | 6  | 2  | 1 |
| PI | Curral Novo do Piauí    | 5.390  | 22  | 8  | 21  | 7  | 2  | 1 |
| PI | Demerval Lobão          | 13.862 | 55  | 20 | 53  | 17 | 5  | 2 |
| PI | Dirceu Arcoverde        | 7.046  | 28  | 10 | 27  | 9  | 3  | 1 |
| PI | Dom Expedito Lopes      | 6.940  | 28  | 10 | 27  | 9  | 3  | 1 |
| PI | Domingos Mourão         | 4.352  | 18  | 6  | 17  | 6  | 2  | 1 |
| PI | Dom Inocêncio           | 9.574  | 38  | 14 | 37  | 12 | 4  | 2 |
| PI | Elesbão Veloso          | 14.550 | 58  | 20 | 56  | 18 | 6  | 2 |
| PI | Eliseu Martins          | 4.943  | 20  | 7  | 19  | 6  | 2  | 1 |
| PI | Esperantina             | 39.953 | 159 | 55 | 153 | 48 | 15 | 6 |
| PI | Fartura do Piauí        | 5.330  | 22  | 8  | 21  | 7  | 2  | 1 |
| PI | Flores do Piauí         | 4.461  | 18  | 7  | 17  | 6  | 2  | 1 |
| PI | Floresta do Piauí       | 2.561  | 11  | 4  | 10  | 4  | 1  | 1 |
| PI | Floriano                | 60.111 | 239 | 83 | 229 | 72 | 22 | 8 |
| PI | Francinópolis           | 5.345  | 22  | 8  | 21  | 7  | 2  | 1 |
| PI | Francisco Ayres         | 4.300  | 18  | 6  | 17  | 6  | 2  | 1 |
| PI | Francisco Macedo        | 3.216  | 13  | 5  | 13  | 4  | 2  | 1 |
| PI | Francisco Santos        | 9.423  | 38  | 13 | 36  | 12 | 4  | 2 |
| PI | Fronteiras              | 11.690 | 47  | 17 | 45  | 14 | 5  | 2 |
| PI | Geminiano               | 5.477  | 22  | 8  | 21  | 7  | 2  | 1 |
| PI | Gilbués                 | 10.698 | 43  | 15 | 41  | 13 | 4  | 2 |
| PI | Guadalupe               | 10.496 | 42  | 15 | 40  | 13 | 4  | 2 |
| PI | Guaribas                | 4.573  | 19  | 7  | 18  | 6  | 2  | 1 |
| PI | Hugo Napoleão           | 3.880  | 16  | 6  | 15  | 5  | 2  | 1 |
| PI | Ilha Grande             | 9.487  | 38  | 14 | 37  | 12 | 4  | 2 |
| PI | Inhuma                  | 15.330 | 61  | 22 | 59  | 19 | 6  | 2 |
| PI | Ipiranga do Piauí       | 9.863  | 40  | 14 | 38  | 12 | 4  | 2 |
| PI | Isaías Coelho           | 8.582  | 35  | 12 | 33  | 11 | 4  | 2 |
| PI | Itainópolis             | 11.571 | 46  | 16 | 45  | 14 | 5  | 2 |
| PI | Itaueira                | 11.037 | 44  | 16 | 43  | 14 | 4  | 2 |
| PI | Jacobina do Piauí       | 5.718  | 23  | 8  | 22  | 7  | 3  | 1 |
| PI | Jaicós                  | 19.233 | 77  | 27 | 74  | 23 | 7  | 3 |
| PI | Jardim do Mulato        | 4.522  | 18  | 7  | 18  | 6  | 2  | 1 |
| PI | Jatobá do Piauí         | 4.885  | 20  | 7  | 19  | 6  | 2  | 1 |
| PI | Jerumenha               | 4.443  | 18  | 7  | 17  | 6  | 2  | 1 |
| PI | João Costa              | 3.003  | 12  | 5  | 12  | 4  | 2  | 1 |
| PI | Joaquim Pires           | 14.396 | 58  | 20 | 55  | 18 | 6  | 2 |
| PI | Joca Marques            | 5.488  | 22  | 8  | 21  | 7  | 2  | 1 |
| PI | José de Freitas         | 39.457 | 157 | 55 | 151 | 48 | 14 | 5 |
| PI | Juazeiro do Piauí       | 5.491  | 22  | 8  | 21  | 7  | 2  | 1 |
| PI | Júlio Borges            | 5.653  | 23  | 8  | 22  | 7  | 2  | 1 |
| PI | Jurema                  | 4.790  | 19  | 7  | 19  | 6  | 2  | 1 |
| PI | Lagoinha do Piauí       | 2.870  | 12  | 4  | 11  | 4  | 2  | 1 |
| PI | Lagoa Alegre            | 8.610  | 35  | 12 | 33  | 11 | 4  | 2 |
| PI | Lagoa do Barro do Piauí | 4.658  | 19  | 7  | 18  | 6  | 2  | 1 |
| PI | Lagoa de São Francisco  | 6.795  | 27  | 10 | 26  | 9  | 3  | 1 |
| PI | Lagoa do Piauí          | 4.086  | 17  | 6  | 16  | 5  | 2  | 1 |
| PI | Lagoa do Sítio          | 5.219  | 21  | 8  | 20  | 7  | 2  | 1 |
| PI | Landri Sales            | 5.272  | 21  | 8  | 21  | 7  | 2  | 1 |
| PI | Luís Correia            | 30.558 | 122 | 42 | 117 | 37 | 11 | 4 |
| PI | Luzilândia              | 25.521 | 102 | 36 | 98  | 31 | 9  | 4 |
| PI | Madeiro                 | 8.372  | 34  | 12 | 32  | 11 | 3  | 2 |
| PI | Manoel Emídio           | 5.352  | 22  | 8  | 21  | 7  | 2  | 1 |
| PI | Marcolândia             | 8.590  | 35  | 12 | 33  | 11 | 4  | 2 |

|    |                                 |         |     |     |     |     |    |    |
|----|---------------------------------|---------|-----|-----|-----|-----|----|----|
| PI | Marcos Parente                  | 4.546   | 19  | 7   | 18  | 6   | 2  | 1  |
| PI | Massapê do Piauí                | 6.456   | 26  | 9   | 25  | 8   | 3  | 1  |
| PI | Matias Olímpio                  | 10.979  | 44  | 16  | 42  | 14  | 4  | 2  |
| PI | Miguel Alves                    | 33.901  | 135 | 47  | 130 | 41  | 12 | 5  |
| PI | Miguel Leão                     | 1.239   | 5   | 2   | 5   | 2   | 1  | 1  |
| PI | Milton Brandão                  | 6.603   | 27  | 10  | 26  | 8   | 3  | 1  |
| PI | Monsenhor Gil                   | 10.563  | 42  | 15  | 41  | 13  | 4  | 2  |
| PI | Monsenhor Hipólito              | 7.785   | 31  | 11  | 30  | 10  | 3  | 1  |
| PI | Monte Alegre do Piauí           | 10.618  | 43  | 15  | 41  | 13  | 4  | 2  |
| PI | Morro Cabeça no Tempo           | 4.527   | 18  | 7   | 18  | 6   | 2  | 1  |
| PI | Morro do Chapéu do Piauí        | 6.825   | 28  | 10  | 26  | 9   | 3  | 1  |
| PI | Murici dos Portelas             | 9.258   | 37  | 13  | 36  | 12  | 4  | 2  |
| PI | Nazaré do Piauí                 | 7.307   | 29  | 11  | 28  | 9   | 3  | 1  |
| PI | Nazária                         | 8.632   | 35  | 12  | 33  | 11  | 4  | 2  |
| PI | Nossa Senhora de Nazaré         | 4.911   | 20  | 7   | 19  | 6   | 2  | 1  |
| PI | Nossa Senhora dos Remédios      | 8.751   | 35  | 13  | 34  | 11  | 4  | 2  |
| PI | Novo Oriente do Piauí           | 6.548   | 26  | 9   | 25  | 8   | 3  | 1  |
| PI | Novo Santo Antônio              | 3.014   | 12  | 5   | 12  | 4   | 2  | 1  |
| PI | Oeiras                          | 37.138  | 148 | 51  | 142 | 45  | 14 | 5  |
| PI | Olho D'Água do Piauí            | 2.477   | 10  | 4   | 10  | 3   | 1  | 1  |
| PI | Padre Marcos                    | 6.879   | 28  | 10  | 27  | 9   | 3  | 1  |
| PI | Paes Landim                     | 4.124   | 17  | 6   | 16  | 5   | 2  | 1  |
| PI | Pajeú do Piauí                  | 3.416   | 14  | 5   | 14  | 5   | 2  | 1  |
| PI | Palmeira do Piauí               | 5.029   | 20  | 7   | 20  | 7   | 2  | 1  |
| PI | Palmeirais                      | 14.633  | 59  | 21  | 56  | 18  | 6  | 2  |
| PI | Paquetá                         | 3.931   | 16  | 6   | 15  | 5   | 2  | 1  |
| PI | Parnaíba                        | 10.846  | 43  | 15  | 42  | 13  | 4  | 2  |
| PI | Parnaíba                        | 153.863 | 610 | 212 | 586 | 184 | 55 | 20 |
| PI | Passagem Franca do Piauí        | 4.331   | 18  | 6   | 17  | 6   | 2  | 1  |
| PI | Patos do Piauí                  | 6.420   | 26  | 9   | 25  | 8   | 3  | 1  |
| PI | Pau D'Arco do Piauí             | 4.084   | 17  | 6   | 16  | 5   | 2  | 1  |
| PI | Paulistana                      | 20.583  | 82  | 29  | 79  | 25  | 8  | 3  |
| PI | Pavussu                         | 3.662   | 15  | 6   | 14  | 5   | 2  | 1  |
| PI | Pedro II                        | 38.812  | 154 | 54  | 148 | 47  | 14 | 5  |
| PI | Pedro Laurentino                | 2.551   | 11  | 4   | 10  | 4   | 1  | 1  |
| PI | Nova Santa Rita                 | 4.392   | 18  | 7   | 17  | 6   | 2  | 1  |
| PI | Picos                           | 78.627  | 312 | 108 | 300 | 95  | 28 | 10 |
| PI | Pimenteiras                     | 12.150  | 49  | 17  | 47  | 15  | 5  | 2  |
| PI | Pio IX                          | 18.492  | 74  | 26  | 71  | 23  | 7  | 3  |
| PI | Piracuruca                      | 28.952  | 115 | 40  | 111 | 35  | 11 | 4  |
| PI | Piripiri                        | 63.829  | 254 | 88  | 244 | 77  | 23 | 9  |
| PI | Porto                           | 12.646  | 51  | 18  | 49  | 16  | 5  | 2  |
| PI | Porto Alegre do Piauí           | 2.728   | 11  | 4   | 11  | 4   | 1  | 1  |
| PI | Prata do Piauí                  | 3.149   | 13  | 5   | 12  | 4   | 2  | 1  |
| PI | Queimada Nova                   | 9.041   | 36  | 13  | 35  | 11  | 4  | 2  |
| PI | Redenção do Gurguéia            | 8.814   | 35  | 13  | 34  | 11  | 4  | 2  |
| PI | Regeneração                     | 17.979  | 72  | 25  | 69  | 22  | 7  | 3  |
| PI | Riacho Frio                     | 4.306   | 18  | 6   | 17  | 6   | 2  | 1  |
| PI | Ribeira do Piauí                | 4.499   | 18  | 7   | 18  | 6   | 2  | 1  |
| PI | Ribeiro Gonçalves               | 7.408   | 30  | 11  | 29  | 9   | 3  | 1  |
| PI | Rio Grande do Piauí             | 6.434   | 26  | 9   | 25  | 8   | 3  | 1  |
| PI | Santa Cruz do Piauí             | 6.254   | 25  | 9   | 24  | 8   | 3  | 1  |
| PI | Santa Cruz dos Milagres         | 4.046   | 17  | 6   | 16  | 5   | 2  | 1  |
| PI | Santa Filomena                  | 6.256   | 25  | 9   | 24  | 8   | 3  | 1  |
| PI | Santa Luz                       | 5.903   | 24  | 9   | 23  | 8   | 3  | 1  |
| PI | Santana do Piauí                | 4.650   | 19  | 7   | 18  | 6   | 2  | 1  |
| PI | Santa Rosa do Piauí             | 5.254   | 21  | 8   | 21  | 7   | 2  | 1  |
| PI | Santo Antônio de Lisboa         | 6.466   | 26  | 9   | 25  | 8   | 3  | 1  |
| PI | Santo Antônio dos Milagres      | 2.172   | 9   | 3   | 9   | 3   | 1  | 1  |
| PI | Santo Inácio do Piauí           | 3.809   | 16  | 6   | 15  | 5   | 2  | 1  |
| PI | São Braz do Piauí               | 4.454   | 18  | 7   | 17  | 6   | 2  | 1  |
| PI | São Félix do Piauí              | 2.923   | 12  | 5   | 12  | 4   | 2  | 1  |
| PI | São Francisco de Assis do Piauí | 5.801   | 23  | 8   | 23  | 7   | 3  | 1  |
| PI | São Francisco do Piauí          | 6.417   | 26  | 9   | 25  | 8   | 3  | 1  |
| PI | São Gonçalo do Gurguéia         | 3.071   | 13  | 5   | 12  | 4   | 2  | 1  |
| PI | São Gonçalo do Piauí            | 5.044   | 20  | 7   | 20  | 7   | 2  | 1  |

|    |                            |         |      |      |      |      |     |     |
|----|----------------------------|---------|------|------|------|------|-----|-----|
| PI | São João da Canabrava      | 4.619   | 19   | 7    | 18   | 6    | 2   | 1   |
| PI | São João da Fronteira      | 6.084   | 25   | 9    | 24   | 8    | 3   | 1   |
| PI | São João da Serra          | 6.106   | 25   | 9    | 24   | 8    | 3   | 1   |
| PI | São João da Varjota        | 4.856   | 20   | 7    | 19   | 6    | 2   | 1   |
| PI | São João do Arraial        | 8.085   | 33   | 12   | 31   | 10   | 3   | 2   |
| PI | São João do Piauí          | 20.720  | 83   | 29   | 79   | 25   | 8   | 3   |
| PI | São José do Divino         | 5.361   | 22   | 8    | 21   | 7    | 2   | 1   |
| PI | São José do Peixe          | 3.737   | 15   | 6    | 15   | 5    | 2   | 1   |
| PI | São José do Piauí          | 6.696   | 27   | 10   | 26   | 9    | 3   | 1   |
| PI | São Julião                 | 6.379   | 26   | 9    | 25   | 8    | 3   | 1   |
| PI | São Lourenço do Piauí      | 4.581   | 19   | 7    | 18   | 6    | 2   | 1   |
| PI | São Luis do Piauí          | 2.648   | 11   | 4    | 11   | 4    | 1   | 1   |
| PI | São Miguel da Baixa Grande | 2.456   | 10   | 4    | 10   | 3    | 1   | 1   |
| PI | São Miguel do Fidalgo      | 3.037   | 13   | 5    | 12   | 4    | 2   | 1   |
| PI | São Miguel do Tapuio       | 17.617  | 70   | 25   | 68   | 22   | 7   | 3   |
| PI | São Pedro do Piauí         | 14.356  | 57   | 20   | 55   | 18   | 6   | 2   |
| PI | São Raimundo Nonato        | 35.035  | 139  | 49   | 134  | 42   | 13  | 5   |
| PI | Sebastião Barros           | 3.434   | 14   | 5    | 14   | 5    | 2   | 1   |
| PI | Sebastião Leal             | 4.311   | 18   | 6    | 17   | 6    | 2   | 1   |
| PI | Sigefredo Pacheco          | 10.074  | 40   | 14   | 39   | 13   | 4   | 2   |
| PI | Simões                     | 14.664  | 59   | 21   | 56   | 18   | 6   | 2   |
| PI | Simplicio Mendes           | 12.778  | 51   | 18   | 49   | 16   | 5   | 2   |
| PI | Socorro do Piauí           | 4.557   | 19   | 7    | 18   | 6    | 2   | 1   |
| PI | Sussuapara                 | 6.801   | 27   | 10   | 26   | 9    | 3   | 1   |
| PI | Tamboril do Piauí          | 2.939   | 12   | 5    | 12   | 4    | 2   | 1   |
| PI | Tanque do Piauí            | 2.781   | 12   | 4    | 11   | 4    | 1   | 1   |
| PI | Teresina                   | 871.126 | 3453 | 1196 | 3318 | 1042 | 307 | 110 |
| PI | União                      | 44.649  | 177  | 62   | 171  | 54   | 16  | 6   |
| PI | Uruçuí                     | 21.746  | 87   | 30   | 83   | 27   | 8   | 3   |
| PI | Valença do Piauí           | 20.940  | 84   | 29   | 80   | 26   | 8   | 3   |
| PI | Várzea Branca              | 4.930   | 20   | 7    | 19   | 6    | 2   | 1   |
| PI | Várzea Grande              | 4.382   | 18   | 7    | 17   | 6    | 2   | 1   |
| PI | Vera Mendes                | 3.082   | 13   | 5    | 12   | 4    | 2   | 1   |
| PI | Vila Nova do Piauí         | 2.935   | 12   | 5    | 12   | 4    | 2   | 1   |
| PI | Wall Ferraz                | 4.479   | 18   | 7    | 18   | 6    | 2   | 1   |
| CE | Abaiara                    | 11.965  | 49   | 17   | 47   | 15   | 5   | 2   |
| CE | Acarape                    | 15.140  | 62   | 22   | 59   | 19   | 6   | 2   |
| CE | Acaraú                     | 63.556  | 258  | 90   | 248  | 78   | 23  | 9   |
| CE | Acopiara                   | 54.687  | 222  | 77   | 213  | 67   | 20  | 8   |
| CE | Aiuaba                     | 17.584  | 72   | 25   | 69   | 22   | 7   | 3   |
| CE | Alcântaras                 | 11.846  | 48   | 17   | 47   | 15   | 5   | 2   |
| CE | Altaneira                  | 7.712   | 32   | 11   | 31   | 10   | 3   | 1   |
| CE | Alto Santo                 | 16.077  | 66   | 23   | 63   | 20   | 6   | 3   |
| CE | Amontada                   | 44.195  | 179  | 62   | 172  | 54   | 16  | 6   |
| CE | Antonina do Norte          | 7.402   | 30   | 11   | 29   | 10   | 3   | 1   |
| CE | Apuiarés                   | 14.742  | 60   | 21   | 58   | 19   | 6   | 2   |
| CE | Aquiraz                    | 81.581  | 331  | 115  | 318  | 100  | 30  | 11  |
| CE | Aracati                    | 75.392  | 306  | 106  | 294  | 93   | 28  | 10  |
| CE | Aracoiaba                  | 26.600  | 108  | 38   | 104  | 33   | 10  | 4   |
| CE | Ararendá                   | 10.983  | 45   | 16   | 43   | 14   | 4   | 2   |
| CE | Araripe                    | 21.707  | 88   | 31   | 85   | 27   | 8   | 3   |
| CE | Aratuba                    | 11.759  | 48   | 17   | 46   | 15   | 5   | 2   |
| CE | Arneiroz                   | 7.848   | 32   | 12   | 31   | 10   | 3   | 2   |
| CE | Assaré                     | 23.537  | 96   | 34   | 92   | 29   | 9   | 4   |
| CE | Aurora                     | 24.567  | 100  | 35   | 96   | 31   | 9   | 4   |
| CE | Baixio                     | 6.318   | 26   | 9    | 25   | 8    | 3   | 1   |
| CE | Banabuiú                   | 18.313  | 75   | 26   | 72   | 23   | 7   | 3   |
| CE | Barbalha                   | 61.662  | 250  | 87   | 240  | 76   | 23  | 8   |
| CE | Barreira                   | 22.715  | 92   | 32   | 89   | 28   | 9   | 3   |
| CE | Barro                      | 22.834  | 93   | 33   | 89   | 28   | 9   | 3   |
| CE | Barroquinha                | 15.069  | 62   | 22   | 59   | 19   | 6   | 2   |
| CE | Baturité                   | 36.127  | 147  | 51   | 141  | 45   | 13  | 5   |
| CE | Beberibe                   | 54.315  | 220  | 77   | 212  | 67   | 20  | 8   |
| CE | Bela Cruz                  | 32.851  | 134  | 47   | 128  | 41   | 12  | 5   |
| CE | Boa Viagem                 | 54.680  | 222  | 77   | 213  | 67   | 20  | 8   |
| CE | Brejo Santo                | 50.195  | 204  | 71   | 196  | 62   | 19  | 7   |

|    |                           |           |       |      |       |      |     |     |
|----|---------------------------|-----------|-------|------|-------|------|-----|-----|
| CE | Camocim                   | 64.147    | 260   | 90   | 250   | 79   | 24  | 9   |
| CE | Campos Sales              | 27.513    | 112   | 39   | 108   | 34   | 10  | 4   |
| CE | Canindé                   | 77.484    | 314   | 109  | 302   | 95   | 28  | 11  |
| CE | Capistrano                | 17.830    | 73    | 25   | 70    | 22   | 7   | 3   |
| CE | Caridade                  | 23.011    | 94    | 33   | 90    | 29   | 9   | 3   |
| CE | Cariré                    | 18.470    | 75    | 26   | 72    | 23   | 7   | 3   |
| CE | Caririaçu                 | 27.008    | 110   | 38   | 106   | 33   | 10  | 4   |
| CE | Cariús                    | 18.700    | 76    | 27   | 73    | 23   | 7   | 3   |
| CE | Carnaubal                 | 17.763    | 72    | 25   | 70    | 22   | 7   | 3   |
| CE | Cascavel                  | 72.706    | 295   | 102  | 283   | 89   | 27  | 10  |
| CE | Catarina                  | 21.041    | 86    | 30   | 82    | 26   | 8   | 3   |
| CE | Catunda                   | 10.410    | 43    | 15   | 41    | 13   | 4   | 2   |
| CE | Caucaia                   | 368.918   | 1494  | 518  | 1436  | 451  | 133 | 48  |
| CE | Cedro                     | 25.612    | 104   | 36   | 100   | 32   | 10  | 4   |
| CE | Chaval                    | 13.112    | 54    | 19   | 52    | 17   | 5   | 2   |
| CE | Choró                     | 13.608    | 56    | 20   | 53    | 17   | 5   | 2   |
| CE | Chorozinho                | 20.286    | 83    | 29   | 79    | 25   | 8   | 3   |
| CE | Coreaú                    | 23.340    | 95    | 33   | 91    | 29   | 9   | 4   |
| CE | Crateús                   | 75.241    | 305   | 106  | 293   | 92   | 28  | 10  |
| CE | Crato                     | 133.913   | 543   | 188  | 522   | 164  | 49  | 18  |
| CE | Croatá                    | 18.201    | 74    | 26   | 71    | 23   | 7   | 3   |
| CE | Cruz                      | 25.121    | 102   | 36   | 98    | 31   | 10  | 4   |
| CE | Deputado Irapuan Pinheiro | 9.698     | 40    | 14   | 38    | 12   | 4   | 2   |
| CE | Ereré                     | 7.254     | 30    | 11   | 29    | 9    | 3   | 1   |
| CE | Eusébio                   | 55.035    | 223   | 78   | 215   | 68   | 20  | 8   |
| CE | Farias Brito              | 19.330    | 79    | 28   | 76    | 24   | 7   | 3   |
| CE | Forquilha                 | 24.680    | 100   | 35   | 97    | 31   | 9   | 4   |
| CE | Fortaleza                 | 2.703.391 | 10948 | 3791 | 10518 | 3303 | 973 | 350 |
| CE | Fortim                    | 16.776    | 68    | 24   | 66    | 21   | 7   | 3   |
| CE | Frecheirinha              | 14.195    | 58    | 20   | 56    | 18   | 6   | 2   |
| CE | General Sampaio           | 7.767     | 32    | 11   | 31    | 10   | 3   | 2   |
| CE | Graça                     | 14.415    | 59    | 21   | 57    | 18   | 6   | 2   |
| CE | Granja                    | 55.170    | 224   | 78   | 215   | 68   | 20  | 8   |
| CE | Granjeiro                 | 4.784     | 20    | 7    | 19    | 6    | 2   | 1   |
| CE | Groaíras                  | 11.219    | 46    | 16   | 44    | 14   | 5   | 2   |
| CE | Guaiúba                   | 26.508    | 108   | 38   | 104   | 33   | 10  | 4   |
| CE | Guaraciaba do Norte       | 40.921    | 166   | 58   | 160   | 50   | 15  | 6   |
| CE | Guaramiranga              | 5.073     | 21    | 8    | 20    | 7    | 2   | 1   |
| CE | Hidrolândia               | 20.126    | 82    | 29   | 79    | 25   | 8   | 3   |
| CE | Horizonte                 | 69.688    | 283   | 98   | 272   | 86   | 26  | 9   |
| CE | Ibaretama                 | 13.385    | 55    | 19   | 53    | 17   | 5   | 2   |
| CE | Ibiapina                  | 25.165    | 102   | 36   | 98    | 31   | 10  | 4   |
| CE | Ibicuitinga               | 12.730    | 52    | 18   | 50    | 16   | 5   | 2   |
| CE | Icapuí                    | 20.183    | 82    | 29   | 79    | 25   | 8   | 3   |
| CE | Icó                       | 68.303    | 277   | 96   | 266   | 84   | 25  | 9   |
| CE | Iguatu                    | 103.633   | 420   | 146  | 404   | 127  | 38  | 14  |
| CE | Independência             | 26.196    | 107   | 37   | 102   | 33   | 10  | 4   |
| CE | Ipaporanga                | 11.597    | 47    | 17   | 46    | 15   | 5   | 2   |
| CE | Ipaumirim                 | 12.507    | 51    | 18   | 49    | 16   | 5   | 2   |
| CE | Ipu                       | 42.148    | 171   | 60   | 164   | 52   | 16  | 6   |
| CE | Ipueiras                  | 38.064    | 155   | 54   | 149   | 47   | 14  | 5   |
| CE | Iracema                   | 14.351    | 59    | 21   | 56    | 18   | 6   | 2   |
| CE | Irauçuba                  | 24.450    | 100   | 35   | 96    | 30   | 9   | 4   |
| CE | Itaiçaba                  | 7.904     | 33    | 12   | 31    | 10   | 3   | 2   |
| CE | Itaitinga                 | 38.661    | 157   | 55   | 151   | 48   | 14  | 5   |
| CE | Itapajé                   | 53.448    | 217   | 75   | 208   | 66   | 20  | 7   |
| CE | Itapipoca                 | 131.687   | 534   | 185  | 513   | 161  | 48  | 18  |
| CE | Itapiúna                  | 20.653    | 84    | 29   | 81    | 26   | 8   | 3   |
| CE | Itarema                   | 42.595    | 173   | 60   | 166   | 53   | 16  | 6   |
| CE | Itatira                   | 22.018    | 90    | 31   | 86    | 27   | 8   | 3   |
| CE | Jaguaratama               | 18.133    | 74    | 26   | 71    | 23   | 7   | 3   |
| CE | Jaguaribara               | 11.580    | 47    | 17   | 46    | 15   | 5   | 2   |
| CE | Jaguaribe                 | 34.592    | 141   | 49   | 135   | 43   | 13  | 5   |
| CE | Jaguaruana                | 33.960    | 138   | 48   | 133   | 42   | 13  | 5   |
| CE | Jardim                    | 27.187    | 111   | 39   | 106   | 34   | 10  | 4   |
| CE | Jati                      | 8.150     | 34    | 12   | 32    | 10   | 3   | 2   |

|    |                         |         |      |     |      |     |     |    |
|----|-------------------------|---------|------|-----|------|-----|-----|----|
| CE | Jijoca de Jericoacoara  | 20.351  | 83   | 29  | 80   | 25  | 8   | 3  |
| CE | Juazeiro do Norte       | 278.264 | 1127 | 391 | 1083 | 340 | 101 | 36 |
| CE | Jucás                   | 24.949  | 102  | 35  | 98   | 31  | 9   | 4  |
| CE | Lavras da Mangabeira    | 31.476  | 128  | 45  | 123  | 39  | 12  | 5  |
| CE | Limoeiro do Norte       | 60.232  | 244  | 85  | 235  | 74  | 22  | 8  |
| CE | Madalena                | 20.031  | 82   | 29  | 78   | 25  | 8   | 3  |
| CE | Maracanaú               | 230.986 | 936  | 324 | 899  | 283 | 84  | 30 |
| CE | Maranguape              | 131.677 | 534  | 185 | 513  | 161 | 48  | 18 |
| CE | Marco                   | 27.822  | 113  | 40  | 109  | 34  | 11  | 4  |
| CE | Martinópolis            | 11.407  | 47   | 16  | 45   | 14  | 5   | 2  |
| CE | Massapê                 | 39.341  | 160  | 56  | 154  | 49  | 15  | 6  |
| CE | Mauriti                 | 48.370  | 196  | 68  | 189  | 60  | 18  | 7  |
| CE | Meruoca                 | 15.309  | 62   | 22  | 60   | 19  | 6   | 2  |
| CE | Milagres                | 27.413  | 112  | 39  | 107  | 34  | 10  | 4  |
| CE | Milhã                   | 13.129  | 54   | 19  | 52   | 17  | 5   | 2  |
| CE | Miraima                 | 13.965  | 57   | 20  | 55   | 18  | 6   | 2  |
| CE | Missão Velha            | 35.566  | 145  | 50  | 139  | 44  | 13  | 5  |
| CE | Mombaça                 | 43.917  | 178  | 62  | 171  | 54  | 16  | 6  |
| CE | Monsenhor Tabosa        | 17.264  | 70   | 25  | 68   | 22  | 7   | 3  |
| CE | Morada Nova             | 61.590  | 250  | 87  | 240  | 76  | 23  | 8  |
| CE | Moraújo                 | 8.833   | 36   | 13  | 35   | 11  | 4   | 2  |
| CE | Morrinhos               | 22.830  | 93   | 33  | 89   | 28  | 9   | 3  |
| CE | Mucambo                 | 14.561  | 59   | 21  | 57   | 18  | 6   | 2  |
| CE | Mulungu                 | 11.056  | 45   | 16  | 44   | 14  | 4   | 2  |
| CE | Nova Olinda             | 15.798  | 64   | 23  | 62   | 20  | 6   | 3  |
| CE | Nova Russas             | 32.487  | 132  | 46  | 127  | 40  | 12  | 5  |
| CE | Novo Oriente            | 28.737  | 117  | 41  | 112  | 36  | 11  | 4  |
| CE | Ocara                   | 25.958  | 106  | 37  | 101  | 32  | 10  | 4  |
| CE | Orós                    | 21.342  | 87   | 30  | 84   | 27  | 8   | 3  |
| CE | Pacajus                 | 74.145  | 301  | 104 | 289  | 91  | 27  | 10 |
| CE | Pacatuba                | 85.647  | 347  | 121 | 334  | 105 | 31  | 12 |
| CE | Pacoti                  | 12.313  | 50   | 18  | 48   | 16  | 5   | 2  |
| CE | Pacujá                  | 6.565   | 27   | 10  | 26   | 9   | 3   | 1  |
| CE | Palhano                 | 9.458   | 39   | 14  | 37   | 12  | 4   | 2  |
| CE | Palmácia                | 13.553  | 55   | 20  | 53   | 17  | 5   | 2  |
| CE | Paracuru                | 35.526  | 144  | 50  | 139  | 44  | 13  | 5  |
| CE | Paraipaba               | 33.232  | 135  | 47  | 130  | 41  | 12  | 5  |
| CE | Parambu                 | 31.391  | 128  | 45  | 123  | 39  | 12  | 5  |
| CE | Paramoti                | 12.276  | 50   | 18  | 48   | 15  | 5   | 2  |
| CE | Pedra Branca            | 43.359  | 176  | 61  | 169  | 53  | 16  | 6  |
| CE | Penaforte               | 9.207   | 38   | 13  | 36   | 12  | 4   | 2  |
| CE | Pentecoste              | 38.045  | 155  | 54  | 149  | 47  | 14  | 5  |
| CE | Pereiro                 | 16.356  | 67   | 23  | 64   | 20  | 6   | 3  |
| CE | Pindoretama             | 20.964  | 85   | 30  | 82   | 26  | 8   | 3  |
| CE | Piquet Carneiro         | 17.210  | 70   | 25  | 67   | 22  | 7   | 3  |
| CE | Pires Ferreira          | 11.052  | 45   | 16  | 43   | 14  | 4   | 2  |
| CE | Poranga                 | 12.358  | 51   | 18  | 49   | 16  | 5   | 2  |
| CE | Porteiras               | 14.920  | 61   | 21  | 59   | 19  | 6   | 2  |
| CE | Potengi                 | 11.165  | 46   | 16  | 44   | 14  | 5   | 2  |
| CE | Potiretama              | 6.455   | 27   | 10  | 26   | 8   | 3   | 1  |
| CE | Quiterianópolis         | 21.246  | 87   | 30  | 83   | 26  | 8   | 3  |
| CE | Quixadá                 | 88.899  | 361  | 125 | 346  | 109 | 32  | 12 |
| CE | Quixelô                 | 16.116  | 66   | 23  | 63   | 20  | 6   | 3  |
| CE | Quixeramobim            | 82.455  | 334  | 116 | 321  | 101 | 30  | 11 |
| CE | Quixeré                 | 22.432  | 91   | 32  | 88   | 28  | 9   | 3  |
| CE | Redenção                | 29.238  | 119  | 41  | 114  | 36  | 11  | 4  |
| CE | Reriutaba               | 18.279  | 75   | 26  | 72   | 23  | 7   | 3  |
| CE | Russas                  | 79.550  | 323  | 112 | 310  | 98  | 29  | 11 |
| CE | Saboeiro                | 15.757  | 64   | 23  | 62   | 20  | 6   | 3  |
| CE | Salitre                 | 16.714  | 68   | 24  | 66   | 21  | 7   | 3  |
| CE | Santana do Acaraú       | 32.851  | 134  | 47  | 128  | 41  | 12  | 5  |
| CE | Santana do Cariri       | 17.726  | 72   | 25  | 69   | 22  | 7   | 3  |
| CE | Santa Quitéria          | 43.719  | 178  | 62  | 171  | 54  | 16  | 6  |
| CE | São Benedito            | 48.354  | 196  | 68  | 189  | 60  | 18  | 7  |
| CE | São Gonçalo do Amarante | 49.306  | 200  | 70  | 192  | 61  | 18  | 7  |
| CE | São João do Jaguaribe   | 7.557   | 31   | 11  | 30   | 10  | 3   | 1  |



|    |                         |         |      |     |      |     |     |    |
|----|-------------------------|---------|------|-----|------|-----|-----|----|
| CE | São Luís do Curu        | 13.086  | 53   | 19  | 51   | 16  | 5   | 2  |
| CE | Senador Pompeu          | 25.418  | 103  | 36  | 99   | 32  | 10  | 4  |
| CE | Senador Sá              | 7.758   | 32   | 11  | 31   | 10  | 3   | 2  |
| CE | Sobral                  | 212.437 | 861  | 298 | 827  | 260 | 77  | 28 |
| CE | Solonópole              | 18.389  | 75   | 26  | 72   | 23  | 7   | 3  |
| CE | Tabuleiro do Norte      | 32.079  | 130  | 45  | 125  | 40  | 12  | 5  |
| CE | Tamboril                | 26.199  | 107  | 37  | 102  | 33  | 10  | 4  |
| CE | Tarrafas                | 8.555   | 35   | 12  | 34   | 11  | 4   | 2  |
| CE | Tauá                    | 59.259  | 240  | 84  | 231  | 73  | 22  | 8  |
| CE | Tejuçuoca               | 19.551  | 80   | 28  | 77   | 24  | 8   | 3  |
| CE | Tianguá                 | 77.111  | 313  | 109 | 301  | 95  | 28  | 10 |
| CE | Trairi                  | 56.653  | 230  | 80  | 221  | 70  | 21  | 8  |
| CE | Tururu                  | 16.588  | 68   | 24  | 65   | 21  | 6   | 3  |
| CE | Ubajara                 | 35.295  | 143  | 50  | 138  | 44  | 13  | 5  |
| CE | Umari                   | 7.740   | 32   | 11  | 31   | 10  | 3   | 1  |
| CE | Umirim                  | 19.976  | 81   | 29  | 78   | 25  | 8   | 3  |
| CE | Uruburetama             | 22.223  | 90   | 32  | 87   | 28  | 8   | 3  |
| CE | Uruoca                  | 13.988  | 57   | 20  | 55   | 18  | 6   | 2  |
| CE | Varjota                 | 18.520  | 75   | 26  | 73   | 23  | 7   | 3  |
| CE | Várzea Alegre           | 41.078  | 167  | 58  | 160  | 51  | 15  | 6  |
| CE | Viçosa do Ceará         | 61.916  | 251  | 87  | 241  | 76  | 23  | 8  |
| RN | Acarí                   | 11.106  | 46   | 16  | 44   | 14  | 5   | 2  |
| RN | Açu                     | 58.743  | 241  | 84  | 231  | 73  | 22  | 8  |
| RN | Afonso Bezerra          | 11.024  | 46   | 16  | 44   | 14  | 5   | 2  |
| RN | Água Nova               | 3.293   | 14   | 5   | 13   | 5   | 2   | 1  |
| RN | Alexandria              | 13.529  | 56   | 20  | 54   | 17  | 5   | 2  |
| RN | Almino Afonso           | 4.685   | 20   | 7   | 19   | 6   | 2   | 1  |
| RN | Alto do Rodrigues       | 14.923  | 62   | 22  | 59   | 19  | 6   | 2  |
| RN | Angicos                 | 11.695  | 48   | 17  | 46   | 15  | 5   | 2  |
| RN | Antônio Martins         | 7.162   | 30   | 11  | 29   | 9   | 3   | 1  |
| RN | Apodi                   | 35.904  | 147  | 51  | 142  | 45  | 14  | 5  |
| RN | Areia Branca            | 28.156  | 116  | 40  | 111  | 35  | 11  | 4  |
| RN | Arês                    | 14.526  | 60   | 21  | 58   | 18  | 6   | 2  |
| RN | Campo Grande            | 9.686   | 40   | 14  | 39   | 12  | 4   | 2  |
| RN | Baía Formosa            | 9.373   | 39   | 14  | 37   | 12  | 4   | 2  |
| RN | Baraúna                 | 29.112  | 120  | 42  | 115  | 36  | 11  | 4  |
| RN | Barcelona               | 3.989   | 17   | 6   | 16   | 5   | 2   | 1  |
| RN | Bento Fernandes         | 5.552   | 23   | 8   | 22   | 7   | 3   | 1  |
| RN | Bodó                    | 2.171   | 9    | 4   | 9    | 3   | 1   | 1  |
| RN | Bom Jesus               | 10.323  | 43   | 15  | 41   | 13  | 4   | 2  |
| RN | Brejinho                | 12.873  | 53   | 19  | 51   | 16  | 5   | 2  |
| RN | Caiçara do Norte        | 6.572   | 27   | 10  | 26   | 9   | 3   | 1  |
| RN | Caiçara do Rio do Vento | 3.745   | 16   | 6   | 15   | 5   | 2   | 1  |
| RN | Caicó                   | 68.726  | 282  | 98  | 271  | 85  | 25  | 9  |
| RN | Campo Redondo           | 11.363  | 47   | 17  | 45   | 15  | 5   | 2  |
| RN | Canguaretama            | 34.814  | 143  | 50  | 137  | 43  | 13  | 5  |
| RN | Caraúbas                | 20.588  | 85   | 30  | 81   | 26  | 8   | 3  |
| RN | Carnaúba dos Dantas     | 8.297   | 34   | 12  | 33   | 11  | 4   | 2  |
| RN | Carnaubais              | 10.972  | 45   | 16  | 44   | 14  | 4   | 2  |
| RN | Ceará-Mirim             | 74.268  | 304  | 106 | 292  | 92  | 27  | 10 |
| RN | Cerro Corá              | 11.182  | 46   | 16  | 44   | 14  | 5   | 2  |
| RN | Coronel Ezequiel        | 5.501   | 23   | 8   | 22   | 7   | 2   | 1  |
| RN | Coronel João Pessoa     | 4.918   | 21   | 7   | 20   | 7   | 2   | 1  |
| RN | Cruzeta                 | 7.968   | 33   | 12  | 32   | 10  | 3   | 2  |
| RN | Currais Novos           | 45.022  | 185  | 64  | 177  | 56  | 17  | 6  |
| RN | Doutor Severiano        | 7.068   | 29   | 11  | 28   | 9   | 3   | 1  |
| RN | Parnamirim              | 272.490 | 1115 | 386 | 1072 | 337 | 100 | 36 |
| RN | Encanto                 | 5.697   | 24   | 9   | 23   | 8   | 3   | 1  |
| RN | Equador                 | 6.064   | 25   | 9   | 24   | 8   | 3   | 1  |
| RN | Espírito Santo          | 10.463  | 43   | 15  | 42   | 13  | 4   | 2  |
| RN | Extremoz                | 29.282  | 120  | 42  | 116  | 37  | 11  | 4  |
| RN | Felipe Guerra           | 6.009   | 25   | 9   | 24   | 8   | 3   | 1  |
| RN | Fernando Pedroza        | 3.081   | 13   | 5   | 13   | 4   | 2   | 1  |
| RN | Florânia                | 9.772   | 40   | 14  | 39   | 13  | 4   | 2  |
| RN | Francisco Dantas        | 2.801   | 12   | 4   | 12   | 4   | 2   | 1  |
| RN | Frutuoso Gomes          | 4.015   | 17   | 6   | 16   | 5   | 2   | 1  |

|    |                           |         |      |      |      |      |     |     |
|----|---------------------------|---------|------|------|------|------|-----|-----|
| RN | Galinhas                  | 2.903   | 12   | 5    | 12   | 4    | 2   | 1   |
| RN | Goianinha                 | 27.004  | 111  | 39   | 107  | 34   | 10  | 4   |
| RN | Governador Dix-Sept Rosac | 13.115  | 54   | 19   | 52   | 17   | 5   | 2   |
| RN | Grossos                   | 10.541  | 44   | 15   | 42   | 14   | 4   | 2   |
| RN | Guamaré                   | 16.261  | 67   | 24   | 64   | 21   | 6   | 3   |
| RN | Ielmo Marinho             | 14.033  | 58   | 20   | 56   | 18   | 6   | 2   |
| RN | Ipanguaçu                 | 15.759  | 65   | 23   | 62   | 20   | 6   | 3   |
| RN | Ipueira                   | 2.264   | 10   | 4    | 9    | 3    | 1   | 1   |
| RN | Itajá                     | 7.641   | 32   | 11   | 31   | 10   | 3   | 1   |
| RN | Itaú                      | 5.916   | 25   | 9    | 24   | 8    | 3   | 1   |
| RN | Jaçanã                    | 9.341   | 39   | 14   | 37   | 12   | 4   | 2   |
| RN | Jandaíra                  | 6.907   | 29   | 10   | 28   | 9    | 3   | 1   |
| RN | Janduís                   | 5.228   | 22   | 8    | 21   | 7    | 2   | 1   |
| RN | Januário Cicco            | 10.367  | 43   | 15   | 41   | 13   | 4   | 2   |
| RN | Japi                      | 4.935   | 21   | 7    | 20   | 7    | 2   | 1   |
| RN | Jardim de Angicos         | 2.600   | 11   | 4    | 11   | 4    | 1   | 1   |
| RN | Jardim de Piranhas        | 15.044  | 62   | 22   | 60   | 19   | 6   | 2   |
| RN | Jardim do Seridó          | 12.397  | 51   | 18   | 49   | 16   | 5   | 2   |
| RN | João Câmara               | 35.360  | 145  | 51   | 139  | 44   | 13  | 5   |
| RN | João Dias                 | 2.653   | 11   | 4    | 11   | 4    | 1   | 1   |
| RN | José da Penha             | 5.941   | 25   | 9    | 24   | 8    | 3   | 1   |
| RN | Jucurutu                  | 18.335  | 76   | 26   | 73   | 23   | 7   | 3   |
| RN | Jundiá                    | 3.945   | 17   | 6    | 16   | 5    | 2   | 1   |
| RN | Lagoa d'Anta              | 6.851   | 29   | 10   | 27   | 9    | 3   | 1   |
| RN | Lagoa de Pedras           | 7.624   | 32   | 11   | 30   | 10   | 3   | 1   |
| RN | Lagoa de Velhos           | 2.732   | 12   | 4    | 11   | 4    | 1   | 1   |
| RN | Lagoa Nova                | 15.880  | 65   | 23   | 63   | 20   | 6   | 3   |
| RN | Lagoa Salgada             | 8.348   | 35   | 12   | 33   | 11   | 4   | 2   |
| RN | Lajes                     | 11.410  | 47   | 17   | 45   | 15   | 5   | 2   |
| RN | Lajes Pintadas            | 4.768   | 20   | 7    | 19   | 6    | 2   | 1   |
| RN | Lucrecia                  | 4.053   | 17   | 6    | 16   | 6    | 2   | 1   |
| RN | Luis Gomes                | 10.175  | 42   | 15   | 40   | 13   | 4   | 2   |
| RN | Macaíba                   | 82.828  | 339  | 118  | 326  | 103  | 31  | 11  |
| RN | Macau                     | 32.260  | 132  | 46   | 127  | 40   | 12  | 5   |
| RN | Major Sales               | 4.102   | 17   | 6    | 17   | 6    | 2   | 1   |
| RN | Marcelino Vieira          | 8.325   | 35   | 12   | 33   | 11   | 4   | 2   |
| RN | Martins                   | 8.790   | 36   | 13   | 35   | 11   | 4   | 2   |
| RN | Maxaranguape              | 12.714  | 53   | 19   | 50   | 16   | 5   | 2   |
| RN | Messias Targino           | 4.665   | 20   | 7    | 19   | 6    | 2   | 1   |
| RN | Montanhas                 | 11.166  | 46   | 16   | 44   | 14   | 5   | 2   |
| RN | Monte Alegre              | 22.698  | 93   | 33   | 90   | 29   | 9   | 3   |
| RN | Monte das Gameleiras      | 2.063   | 9    | 3    | 9    | 3    | 1   | 1   |
| RN | Mossoró                   | 303.792 | 1243 | 431  | 1195 | 375  | 111 | 40  |
| RN | Natal                     | 896.708 | 3669 | 1271 | 3525 | 1107 | 326 | 117 |
| RN | Nisia Floresta            | 28.266  | 116  | 41   | 112  | 35   | 11  | 4   |
| RN | Nova Cruz                 | 37.554  | 154  | 54   | 148  | 47   | 14  | 5   |
| RN | Olho d'Água do Borges     | 4.231   | 18   | 6    | 17   | 6    | 2   | 1   |
| RN | Ouro Branco               | 4.813   | 20   | 7    | 19   | 6    | 2   | 1   |
| RN | Paraná                    | 4.298   | 18   | 7    | 17   | 6    | 2   | 1   |
| RN | Paraú                     | 3.732   | 16   | 6    | 15   | 5    | 2   | 1   |
| RN | Parazinho                 | 5.307   | 22   | 8    | 21   | 7    | 2   | 1   |
| RN | Parellhas                 | 21.611  | 89   | 31   | 85   | 27   | 8   | 3   |
| RN | Rio do Fogo               | 10.961  | 45   | 16   | 44   | 14   | 4   | 2   |
| RN | Passa e Fica              | 13.667  | 56   | 20   | 54   | 17   | 5   | 2   |
| RN | Passagem                  | 3.114   | 13   | 5    | 13   | 4    | 2   | 1   |
| RN | Patu                      | 12.861  | 53   | 19   | 51   | 16   | 5   | 2   |
| RN | Santa Maria               | 5.689   | 24   | 9    | 23   | 8    | 3   | 1   |
| RN | Pau dos Ferros            | 30.802  | 127  | 44   | 122  | 39   | 12  | 5   |
| RN | Pedra Grande              | 3.163   | 13   | 5    | 13   | 4    | 2   | 1   |
| RN | Pedra Preta               | 2.419   | 10   | 4    | 10   | 3    | 1   | 1   |
| RN | Pedro Avelino             | 6.591   | 27   | 10   | 26   | 9    | 3   | 1   |
| RN | Pedro Velho               | 14.881  | 61   | 22   | 59   | 19   | 6   | 2   |
| RN | Pendências                | 15.411  | 64   | 22   | 61   | 20   | 6   | 3   |
| RN | Piões                     | 3.900   | 16   | 6    | 16   | 5    | 2   | 1   |
| RN | Poço Branco               | 15.646  | 65   | 23   | 62   | 20   | 6   | 3   |
| RN | Portalegre                | 7.944   | 33   | 12   | 32   | 10   | 3   | 2   |

|    |                          |         |     |     |     |     |    |    |
|----|--------------------------|---------|-----|-----|-----|-----|----|----|
| RN | Porto do Mangue          | 6.605   | 28  | 10  | 26  | 9   | 3  | 1  |
| RN | Serra Caiada             | 10.646  | 44  | 16  | 42  | 14  | 4  | 2  |
| RN | Pureza                   | 9.825   | 41  | 14  | 39  | 13  | 4  | 2  |
| RN | Rafael Fernandes         | 5.158   | 22  | 8   | 21  | 7   | 2  | 1  |
| RN | Rafael Godeiro           | 3.214   | 14  | 5   | 13  | 4   | 2  | 1  |
| RN | Riacho da Cruz           | 3.648   | 15  | 6   | 15  | 5   | 2  | 1  |
| RN | Riacho de Santana        | 4.194   | 18  | 6   | 17  | 6   | 2  | 1  |
| RN | Riachuelo                | 8.310   | 34  | 12  | 33  | 11  | 4  | 2  |
| RN | Rodolfo Fernandes        | 4.457   | 19  | 7   | 18  | 6   | 2  | 1  |
| RN | Tibau                    | 4.173   | 18  | 6   | 17  | 6   | 2  | 1  |
| RN | Ruy Barbosa              | 3.584   | 15  | 6   | 15  | 5   | 2  | 1  |
| RN | Santa Cruz               | 40.295  | 165 | 58  | 159 | 50  | 15 | 6  |
| RN | Santana do Matos         | 11.808  | 49  | 17  | 47  | 15  | 5  | 2  |
| RN | Santana do Seridó        | 2.699   | 12  | 4   | 11  | 4   | 1  | 1  |
| RN | Santo Antônio            | 24.422  | 100 | 35  | 96  | 31  | 9  | 4  |
| RN | São Bento do Norte       | 2.687   | 11  | 4   | 11  | 4   | 1  | 1  |
| RN | São Bento do Trairi      | 4.541   | 19  | 7   | 18  | 6   | 2  | 1  |
| RN | São Fernando             | 3.606   | 15  | 6   | 15  | 5   | 2  | 1  |
| RN | São Francisco do Oeste   | 4.281   | 18  | 7   | 17  | 6   | 2  | 1  |
| RN | São Gonçalo do Amarante  | 104.919 | 430 | 149 | 413 | 130 | 39 | 14 |
| RN | São João do Sabugi       | 6.221   | 26  | 9   | 25  | 8   | 3  | 1  |
| RN | São José de Mipibu       | 44.566  | 183 | 64  | 176 | 56  | 17 | 6  |
| RN | São José do Campestre    | 12.901  | 53  | 19  | 51  | 16  | 5  | 2  |
| RN | São José do Seridó       | 4.696   | 20  | 7   | 19  | 6   | 2  | 1  |
| RN | São Miguel               | 23.789  | 98  | 34  | 94  | 30  | 9  | 4  |
| RN | São Miguel do Gostoso    | 10.441  | 43  | 15  | 42  | 13  | 4  | 2  |
| RN | São Paulo do Potengi     | 17.858  | 74  | 26  | 71  | 23  | 7  | 3  |
| RN | São Pedro                | 5.889   | 25  | 9   | 24  | 8   | 3  | 1  |
| RN | São Rafael               | 8.183   | 34  | 12  | 33  | 11  | 3  | 2  |
| RN | São Tomé                 | 11.051  | 46  | 16  | 44  | 14  | 5  | 2  |
| RN | São Vicente              | 6.476   | 27  | 10  | 26  | 8   | 3  | 1  |
| RN | Senador Elói de Souza    | 6.167   | 26  | 9   | 25  | 8   | 3  | 1  |
| RN | Senador Georgino Avelino | 4.527   | 19  | 7   | 18  | 6   | 2  | 1  |
| RN | Serra de São Bento       | 5.739   | 24  | 9   | 23  | 8   | 3  | 1  |
| RN | Serra do Mel             | 12.225  | 51  | 18  | 49  | 16  | 5  | 2  |
| RN | Serra Negra do Norte     | 8.105   | 34  | 12  | 32  | 11  | 3  | 2  |
| RN | Serrinha                 | 6.128   | 26  | 9   | 25  | 8   | 3  | 1  |
| RN | Serrinha dos Pintos      | 4.832   | 20  | 7   | 19  | 6   | 2  | 1  |
| RN | Severiano Melo           | 1.743   | 8   | 3   | 7   | 3   | 1  | 1  |
| RN | Sítio Novo               | 5.600   | 23  | 8   | 23  | 7   | 3  | 1  |
| RN | Taboleiro Grande         | 2.606   | 11  | 4   | 11  | 4   | 1  | 1  |
| RN | Taipu                    | 12.314  | 51  | 18  | 49  | 16  | 5  | 2  |
| RN | Tangará                  | 16.008  | 66  | 23  | 63  | 20  | 6  | 3  |
| RN | Tenente Ananias          | 10.923  | 45  | 16  | 43  | 14  | 4  | 2  |
| RN | Tenente Laurentino Cruz  | 6.085   | 25  | 9   | 24  | 8   | 3  | 1  |
| RN | Tibau do Sul             | 14.694  | 61  | 21  | 58  | 19  | 6  | 2  |
| RN | Timbaúba dos Batistas    | 2.427   | 10  | 4   | 10  | 3   | 1  | 1  |
| RN | Touros                   | 33.716  | 138 | 48  | 133 | 42  | 13 | 5  |
| RN | Triunfo Potiguar         | 3.195   | 14  | 5   | 13  | 4   | 2  | 1  |
| RN | Umarizal                 | 10.485  | 43  | 15  | 42  | 13  | 4  | 2  |
| RN | Upanema                  | 14.937  | 62  | 22  | 59  | 19  | 6  | 2  |
| RN | Várzea                   | 5.529   | 23  | 8   | 22  | 7   | 3  | 1  |
| RN | Venha-Ver                | 4.232   | 18  | 6   | 17  | 6   | 2  | 1  |
| RN | Vera Cruz                | 12.789  | 53  | 19  | 51  | 16  | 5  | 2  |
| RN | Viçosa                   | 1.731   | 8   | 3   | 7   | 3   | 1  | 1  |
| RN | Vila Flor                | 3.217   | 14  | 5   | 13  | 4   | 2  | 1  |
| PB | Água Branca              | 10.375  | 42  | 15  | 41  | 13  | 4  | 2  |
| PB | Aguiar                   | 5.622   | 23  | 8   | 22  | 7   | 3  | 1  |
| PB | Alagoa Grande            | 28.384  | 115 | 40  | 111 | 35  | 11 | 4  |
| PB | Alagoa Nova              | 20.992  | 85  | 30  | 82  | 26  | 8  | 3  |
| PB | Alagoinha                | 14.629  | 60  | 21  | 57  | 18  | 6  | 2  |
| PB | Alcantil                 | 5.527   | 23  | 8   | 22  | 7   | 2  | 1  |
| PB | Algodão de Jandaíra      | 2.588   | 11  | 4   | 11  | 4   | 1  | 1  |
| PB | Alhandra                 | 19.865  | 81  | 28  | 78  | 25  | 8  | 3  |
| PB | São João do Rio do Peixe | 18.020  | 73  | 26  | 71  | 22  | 7  | 3  |
| PB | Amparo                   | 2.264   | 10  | 4   | 9   | 3   | 1  | 1  |

|    |                        |         |      |     |      |     |     |    |
|----|------------------------|---------|------|-----|------|-----|-----|----|
| PB | Aparecida              | 8.482   | 35   | 12  | 33   | 11  | 4   | 2  |
| PB | Araçagi                | 16.857  | 69   | 24  | 66   | 21  | 7   | 3  |
| PB | Arara                  | 13.613  | 56   | 20  | 53   | 17  | 5   | 2  |
| PB | Araruna                | 20.610  | 84   | 29  | 81   | 26  | 8   | 3  |
| PB | Areia                  | 22.493  | 92   | 32  | 88   | 28  | 9   | 3  |
| PB | Areia de Baraúnas      | 2.105   | 9    | 3   | 9    | 3   | 1   | 1  |
| PB | Areial                 | 7.054   | 29   | 10  | 28   | 9   | 3   | 1  |
| PB | Aroeiras               | 19.081  | 78   | 27  | 75   | 24  | 7   | 3  |
| PB | Assunção               | 4.067   | 17   | 6   | 16   | 5   | 2   | 1  |
| PB | Baía da Traição        | 9.197   | 38   | 13  | 36   | 12  | 4   | 2  |
| PB | Bananeiras             | 21.220  | 86   | 30  | 83   | 26  | 8   | 3  |
| PB | Baraúna                | 5.033   | 21   | 8   | 20   | 7   | 2   | 1  |
| PB | Barra de Santana       | 8.338   | 34   | 12  | 33   | 11  | 3   | 2  |
| PB | Barra de Santa Rosa    | 15.607  | 64   | 22  | 61   | 20  | 6   | 3  |
| PB | Barra de São Miguel    | 6.095   | 25   | 9   | 24   | 8   | 3   | 1  |
| PB | Bayeux                 | 97.519  | 395  | 137 | 380  | 120 | 36  | 13 |
| PB | Belém                  | 17.733  | 72   | 25  | 69   | 22  | 7   | 3  |
| PB | Belém do Brejo do Cruz | 7.356   | 30   | 11  | 29   | 9   | 3   | 1  |
| PB | Bernardino Batista     | 3.571   | 15   | 6   | 14   | 5   | 2   | 1  |
| PB | Boa Ventura            | 5.248   | 22   | 8   | 21   | 7   | 2   | 1  |
| PB | Boa Vista              | 7.218   | 30   | 11  | 29   | 9   | 3   | 1  |
| PB | Bom Jesus              | 2.588   | 11   | 4   | 11   | 4   | 1   | 1  |
| PB | Bom Sucesso            | 4.937   | 20   | 7   | 20   | 7   | 2   | 1  |
| PB | Bonito de Santa Fé     | 12.126  | 50   | 17  | 48   | 15  | 5   | 2  |
| PB | Boqueirão              | 17.934  | 73   | 26  | 70   | 22  | 7   | 3  |
| PB | Igaracy                | 6.092   | 25   | 9   | 24   | 8   | 3   | 1  |
| PB | Borborema              | 5.311   | 22   | 8   | 21   | 7   | 2   | 1  |
| PB | Brejo do Cruz          | 14.287  | 58   | 21  | 56   | 18  | 6   | 2  |
| PB | Brejo dos Santos       | 6.479   | 27   | 10  | 26   | 8   | 3   | 1  |
| PB | Caaporã                | 22.079  | 90   | 31  | 86   | 27  | 8   | 3  |
| PB | Cabaceiras             | 5.710   | 24   | 8   | 23   | 7   | 3   | 1  |
| PB | Cabedelo               | 69.773  | 283  | 98  | 272  | 86  | 26  | 9  |
| PB | Cachoeira dos Índios   | 10.364  | 42   | 15  | 41   | 13  | 4   | 2  |
| PB | Cacimba de Areia       | 3.708   | 16   | 6   | 15   | 5   | 2   | 1  |
| PB | Cacimba de Dentro      | 17.169  | 70   | 25  | 67   | 21  | 7   | 3  |
| PB | Cacimbas               | 7.225   | 30   | 11  | 29   | 9   | 3   | 1  |
| PB | Caiçara                | 7.182   | 30   | 11  | 28   | 9   | 3   | 1  |
| PB | Cajazeiras             | 62.576  | 254  | 88  | 244  | 77  | 23  | 9  |
| PB | Cajazeirinhas          | 3.217   | 14   | 5   | 13   | 4   | 2   | 1  |
| PB | Caldas Brandão         | 6.077   | 25   | 9   | 24   | 8   | 3   | 1  |
| PB | Camalaú                | 6.048   | 25   | 9   | 24   | 8   | 3   | 1  |
| PB | Campina Grande         | 413.830 | 1675 | 580 | 1609 | 506 | 149 | 54 |
| PB | Capim                  | 6.715   | 28   | 10  | 27   | 9   | 3   | 1  |
| PB | Caraúbas               | 4.206   | 18   | 6   | 17   | 6   | 2   | 1  |
| PB | Carrapateira           | 2.714   | 11   | 4   | 11   | 4   | 1   | 1  |
| PB | Casserengue            | 7.530   | 31   | 11  | 30   | 10  | 3   | 1  |
| PB | Catingueira            | 4.938   | 20   | 7   | 20   | 7   | 2   | 1  |
| PB | Catolé do Rocha        | 30.819  | 125  | 44  | 120  | 38  | 12  | 4  |
| PB | Caturité               | 4.898   | 20   | 7   | 20   | 6   | 2   | 1  |
| PB | Conceição              | 19.030  | 77   | 27  | 74   | 24  | 7   | 3  |
| PB | Condado                | 6.662   | 27   | 10  | 26   | 9   | 3   | 1  |
| PB | Conde                  | 25.341  | 103  | 36  | 99   | 31  | 10  | 4  |
| PB | Congo                  | 4.787   | 20   | 7   | 19   | 6   | 2   | 1  |
| PB | Coremas                | 15.438  | 63   | 22  | 61   | 19  | 6   | 2  |
| PB | Coxixola               | 1.948   | 8    | 3   | 8    | 3   | 1   | 1  |
| PB | Cruz do Espírito Santo | 17.599  | 72   | 25  | 69   | 22  | 7   | 3  |
| PB | Cubati                 | 7.866   | 32   | 12  | 31   | 10  | 3   | 2  |
| PB | Cuité                  | 20.331  | 83   | 29  | 80   | 25  | 8   | 3  |
| PB | Cuitegi                | 6.748   | 28   | 10  | 27   | 9   | 3   | 1  |
| PB | Cuité de Mamanguape    | 6.360   | 26   | 9   | 25   | 8   | 3   | 1  |
| PB | Curral de Cima         | 5.209   | 22   | 8   | 21   | 7   | 2   | 1  |
| PB | Curral Velho           | 2.508   | 11   | 4   | 10   | 4   | 1   | 1  |
| PB | Damião                 | 5.409   | 22   | 8   | 22   | 7   | 2   | 1  |
| PB | Desterro               | 8.332   | 34   | 12  | 33   | 11  | 3   | 2  |
| PB | Vista Serrana          | 3.850   | 16   | 6   | 15   | 5   | 2   | 1  |
| PB | Diamante               | 6.506   | 27   | 10  | 26   | 8   | 3   | 1  |

|    |                 |         |      |      |      |      |     |     |
|----|-----------------|---------|------|------|------|------|-----|-----|
| PB | Dona Inês       | 10.375  | 42   | 15   | 41   | 13   | 4   | 2   |
| PB | Duas Estradas   | 3.569   | 15   | 5    | 14   | 5    | 2   | 1   |
| PB | Emas            | 3.556   | 15   | 5    | 14   | 5    | 2   | 1   |
| PB | Esperança       | 33.386  | 136  | 47   | 130  | 41   | 12  | 5   |
| PB | Fagundes        | 11.180  | 46   | 16   | 44   | 14   | 5   | 2   |
| PB | Frei Martinho   | 2.989   | 13   | 5    | 12   | 4    | 2   | 1   |
| PB | Gado Bravo      | 8.292   | 34   | 12   | 33   | 11   | 3   | 2   |
| PB | Guarabira       | 59.389  | 241  | 84   | 231  | 73   | 22  | 8   |
| PB | Gurinhém        | 14.125  | 58   | 20   | 55   | 18   | 6   | 2   |
| PB | Gurjão          | 3.477   | 15   | 5    | 14   | 5    | 2   | 1   |
| PB | Ibiara          | 5.877   | 24   | 9    | 23   | 8    | 3   | 1   |
| PB | Imaculada       | 11.877  | 49   | 17   | 47   | 15   | 5   | 2   |
| PB | Ingá            | 18.184  | 74   | 26   | 71   | 23   | 7   | 3   |
| PB | Itabaiana       | 24.363  | 99   | 35   | 95   | 30   | 9   | 4   |
| PB | Itaporanga      | 24.960  | 101  | 35   | 98   | 31   | 9   | 4   |
| PB | Itapororoca     | 18.978  | 77   | 27   | 74   | 24   | 7   | 3   |
| PB | Itatuba         | 11.069  | 45   | 16   | 44   | 14   | 4   | 2   |
| PB | Jacaraú         | 14.467  | 59   | 21   | 57   | 18   | 6   | 2   |
| PB | Jericó          | 7.751   | 32   | 11   | 31   | 10   | 3   | 1   |
| PB | João Pessoa     | 825.796 | 3342 | 1157 | 3211 | 1009 | 297 | 107 |
| PB | Juarez Távora   | 8.014   | 33   | 12   | 32   | 10   | 3   | 2   |
| PB | Juazeirinho     | 18.422  | 75   | 26   | 72   | 23   | 7   | 3   |
| PB | Junco do Seridó | 7.238   | 30   | 11   | 29   | 9    | 3   | 1   |
| PB | Juripiranga     | 10.830  | 44   | 16   | 43   | 14   | 4   | 2   |
| PB | Juru            | 9.831   | 40   | 14   | 39   | 13   | 4   | 2   |
| PB | Lagoa           | 4.640   | 19   | 7    | 19   | 6    | 2   | 1   |
| PB | Lagoa de Dentro | 7.754   | 32   | 11   | 31   | 10   | 3   | 1   |
| PB | Lagoa Seca      | 27.728  | 113  | 39   | 108  | 34   | 10  | 4   |
| PB | Lastro          | 2.698   | 11   | 4    | 11   | 4    | 1   | 1   |
| PB | Livramento      | 7.274   | 30   | 11   | 29   | 9    | 3   | 1   |
| PB | Logradouro      | 4.406   | 18   | 7    | 18   | 6    | 2   | 1   |
| PB | Lucena          | 13.344  | 54   | 19   | 52   | 17   | 5   | 2   |
| PB | Mãe d'Água      | 3.988   | 17   | 6    | 16   | 5    | 2   | 1   |
| PB | Malta           | 5.745   | 24   | 9    | 23   | 8    | 3   | 1   |
| PB | Mamanguape      | 45.385  | 184  | 64   | 177  | 56   | 17  | 6   |
| PB | Manáira         | 10.988  | 45   | 16   | 43   | 14   | 4   | 2   |
| PB | Marcação        | 8.746   | 36   | 13   | 35   | 11   | 4   | 2   |
| PB | Mari            | 21.895  | 89   | 31   | 86   | 27   | 8   | 3   |
| PB | Marizópolis     | 6.689   | 28   | 10   | 27   | 9    | 3   | 1   |
| PB | Massaranduba    | 14.077  | 57   | 20   | 55   | 18   | 6   | 2   |
| PB | Mataraca        | 8.642   | 35   | 13   | 34   | 11   | 4   | 2   |
| PB | Matinhas        | 4.528   | 19   | 7    | 18   | 6    | 2   | 1   |
| PB | Mato Grosso     | 2.944   | 12   | 5    | 12   | 4    | 2   | 1   |
| PB | Maturéia        | 6.690   | 28   | 10   | 27   | 9    | 3   | 1   |
| PB | Mogeirol        | 13.238  | 54   | 19   | 52   | 17   | 5   | 2   |
| PB | Montadas        | 5.806   | 24   | 9    | 23   | 8    | 3   | 1   |
| PB | Monte Horebe    | 4.867   | 20   | 7    | 19   | 6    | 2   | 1   |
| PB | Monteiro        | 33.638  | 137  | 48   | 131  | 42   | 13  | 5   |
| PB | Mulungu         | 9.962   | 41   | 14   | 39   | 13   | 4   | 2   |
| PB | Natuba          | 10.449  | 43   | 15   | 41   | 13   | 4   | 2   |
| PB | Nazarezinho     | 7.271   | 30   | 11   | 29   | 9    | 3   | 1   |
| PB | Nova Floresta   | 10.614  | 43   | 15   | 42   | 13   | 4   | 2   |
| PB | Nova Olinda     | 5.892   | 24   | 9    | 23   | 8    | 3   | 1   |
| PB | Nova Palmeira   | 5.011   | 21   | 8    | 20   | 7    | 2   | 1   |
| PB | Olho d'Água     | 6.399   | 26   | 9    | 25   | 8    | 3   | 1   |
| PB | Olivedos        | 3.989   | 17   | 6    | 16   | 5    | 2   | 1   |
| PB | Ouro Velho      | 3.052   | 13   | 5    | 12   | 4    | 2   | 1   |
| PB | Parari          | 1.747   | 8    | 3    | 7    | 3    | 1   | 1   |
| PB | Passagem        | 2.453   | 10   | 4    | 10   | 3    | 1   | 1   |
| PB | Patos           | 108.766 | 441  | 153  | 423  | 133  | 40  | 15  |
| PB | Paulista        | 12.411  | 51   | 18   | 49   | 16   | 5   | 2   |
| PB | Pedra Branca    | 3.802   | 16   | 6    | 15   | 5    | 2   | 1   |
| PB | Pedra Lavrada   | 7.954   | 33   | 12   | 31   | 10   | 3   | 2   |
| PB | Pedras de Fogo  | 28.607  | 116  | 41   | 112  | 35   | 11  | 4   |
| PB | Piancó          | 16.147  | 66   | 23   | 63   | 20   | 6   | 3   |
| PB | Picuí           | 18.737  | 76   | 27   | 73   | 23   | 7   | 3   |

|    |                           |         |     |     |     |     |    |    |
|----|---------------------------|---------|-----|-----|-----|-----|----|----|
| PB | Pilar                     | 12.036  | 49  | 17  | 47  | 15  | 5  | 2  |
| PB | Pilões                    | 6.518   | 27  | 10  | 26  | 8   | 3  | 1  |
| PB | Pilõezinhos               | 4.937   | 20  | 7   | 20  | 7   | 2  | 1  |
| PB | Pirpirituba               | 10.590  | 43  | 15  | 42  | 13  | 4  | 2  |
| PB | Pitimbu                   | 19.478  | 79  | 28  | 76  | 24  | 7  | 3  |
| PB | Pocinhos                  | 18.848  | 77  | 27  | 74  | 24  | 7  | 3  |
| PB | Poço Dantas               | 3.877   | 16  | 6   | 16  | 5   | 2  | 1  |
| PB | Poço de José de Moura     | 4.366   | 18  | 7   | 17  | 6   | 2  | 1  |
| PB | Pombal                    | 32.803  | 133 | 46  | 128 | 41  | 12 | 5  |
| PB | Prata                     | 4.265   | 18  | 6   | 17  | 6   | 2  | 1  |
| PB | Princesa Isabel           | 23.749  | 97  | 34  | 93  | 29  | 9  | 4  |
| PB | Puxinanã                  | 13.801  | 56  | 20  | 54  | 17  | 5  | 2  |
| PB | Queimadas                 | 44.388  | 180 | 63  | 173 | 55  | 16 | 6  |
| PB | Quixaba                   | 2.009   | 9   | 3   | 8   | 3   | 1  | 1  |
| PB | Remigio                   | 19.973  | 81  | 28  | 78  | 25  | 8  | 3  |
| PB | Pedro Régis               | 6.139   | 25  | 9   | 24  | 8   | 3  | 1  |
| PB | Riachão                   | 3.650   | 15  | 6   | 15  | 5   | 2  | 1  |
| PB | Riachão do Bacamarte      | 4.562   | 19  | 7   | 18  | 6   | 2  | 1  |
| PB | Riachão do Poço           | 4.571   | 19  | 7   | 18  | 6   | 2  | 1  |
| PB | Riacho de Santo Antônio   | 1.999   | 9   | 3   | 8   | 3   | 1  | 1  |
| PB | Riacho dos Cavalos        | 8.555   | 35  | 12  | 34  | 11  | 4  | 2  |
| PB | Rio Tinto                 | 24.258  | 99  | 34  | 95  | 30  | 9  | 4  |
| PB | Salgadinho                | 3.975   | 17  | 6   | 16  | 5   | 2  | 1  |
| PB | Salgado de São Félix      | 12.123  | 50  | 17  | 48  | 15  | 5  | 2  |
| PB | Santa Cecília             | 6.526   | 27  | 10  | 26  | 8   | 3  | 1  |
| PB | Santa Cruz                | 6.579   | 27  | 10  | 26  | 9   | 3  | 1  |
| PB | Santa Helena              | 5.853   | 24  | 9   | 23  | 8   | 3  | 1  |
| PB | Santa Inês                | 3.591   | 15  | 6   | 14  | 5   | 2  | 1  |
| PB | Santa Luzia               | 15.470  | 63  | 22  | 61  | 19  | 6  | 2  |
| PB | Santana de Mangueira      | 5.098   | 21  | 8   | 20  | 7   | 2  | 1  |
| PB | Santana dos Garrotes      | 6.942   | 29  | 10  | 27  | 9   | 3  | 1  |
| PB | Joca Claudino             | 2.640   | 11  | 4   | 11  | 4   | 1  | 1  |
| PB | Santa Rita                | 138.093 | 559 | 194 | 537 | 169 | 50 | 18 |
| PB | Santa Teresinha           | 4.550   | 19  | 7   | 18  | 6   | 2  | 1  |
| PB | Santo André               | 2.496   | 11  | 4   | 10  | 4   | 1  | 1  |
| PB | São Bento                 | 34.650  | 141 | 49  | 135 | 43  | 13 | 5  |
| PB | São Bentinho              | 4.602   | 19  | 7   | 18  | 6   | 2  | 1  |
| PB | São Domingos do Cariri    | 2.645   | 11  | 4   | 11  | 4   | 1  | 1  |
| PB | São Domingos              | 3.119   | 13  | 5   | 13  | 4   | 2  | 1  |
| PB | São Francisco             | 3.377   | 14  | 5   | 14  | 5   | 2  | 1  |
| PB | São João do Cariri        | 4.170   | 17  | 6   | 17  | 6   | 2  | 1  |
| PB | São João do Tigre         | 4.408   | 18  | 7   | 18  | 6   | 2  | 1  |
| PB | São José da Lagoa Tapada  | 7.622   | 31  | 11  | 30  | 10  | 3  | 1  |
| PB | São José de Caiana        | 6.394   | 26  | 9   | 25  | 8   | 3  | 1  |
| PB | São José de Espinharas    | 4.631   | 19  | 7   | 19  | 6   | 2  | 1  |
| PB | São José dos Ramos        | 6.037   | 25  | 9   | 24  | 8   | 3  | 1  |
| PB | São José de Piranhas      | 20.406  | 83  | 29  | 80  | 25  | 8  | 3  |
| PB | São José de Princesa      | 3.898   | 16  | 6   | 16  | 5   | 2  | 1  |
| PB | São José do Bonfim        | 3.619   | 15  | 6   | 15  | 5   | 2  | 1  |
| PB | São José do Brejo do Cruz | 1.821   | 8   | 3   | 8   | 3   | 1  | 1  |
| PB | São José do Sabugi        | 4.153   | 17  | 6   | 17  | 6   | 2  | 1  |
| PB | São José dos Cordeiros    | 3.607   | 15  | 6   | 15  | 5   | 2  | 1  |
| PB | São Mamede                | 7.682   | 32  | 11  | 30  | 10  | 3  | 1  |
| PB | São Miguel de Taipu       | 7.450   | 31  | 11  | 29  | 10  | 3  | 1  |
| PB | São Sebastião de Lagoa de | 11.793  | 48  | 17  | 46  | 15  | 5  | 2  |
| PB | São Sebastião do Umbuzeir | 3.534   | 15  | 5   | 14  | 5   | 2  | 1  |
| PB | Sapé                      | 52.977  | 215 | 75  | 206 | 65  | 20 | 7  |
| PB | São Vicente do Seridó     | 10.919  | 45  | 16  | 43  | 14  | 4  | 2  |
| PB | Serra Branca              | 13.807  | 56  | 20  | 54  | 17  | 5  | 2  |
| PB | Serra da Raiz             | 3.114   | 13  | 5   | 13  | 4   | 2  | 1  |
| PB | Serra Grande              | 2.921   | 12  | 5   | 12  | 4   | 2  | 1  |
| PB | Serra Redonda             | 7.001   | 29  | 10  | 28  | 9   | 3  | 1  |
| PB | Serraria                  | 6.037   | 25  | 9   | 24  | 8   | 3  | 1  |
| PB | Sertãozinho               | 5.152   | 21  | 8   | 21  | 7   | 2  | 1  |
| PB | Sobrado                   | 7.845   | 32  | 11  | 31  | 10  | 3  | 2  |
| PB | Solânea                   | 26.051  | 106 | 37  | 102 | 32  | 10 | 4  |

|    |                         |         |      |     |      |     |     |    |
|----|-------------------------|---------|------|-----|------|-----|-----|----|
| PB | Soledade                | 15.211  | 62   | 22  | 60   | 19  | 6   | 2  |
| PB | Sossêgo                 | 3.631   | 15   | 6   | 15   | 5   | 2   | 1  |
| PB | Sousa                   | 69.997  | 284  | 99  | 273  | 86  | 26  | 10 |
| PB | Sumé                    | 17.096  | 70   | 24  | 67   | 21  | 7   | 3  |
| PB | Tacima                  | 11.024  | 45   | 16  | 43   | 14  | 4   | 2  |
| PB | Taperoá                 | 15.505  | 63   | 22  | 61   | 19  | 6   | 2  |
| PB | Tavares                 | 14.791  | 60   | 21  | 58   | 19  | 6   | 2  |
| PB | Teixeira                | 15.333  | 63   | 22  | 60   | 19  | 6   | 2  |
| PB | Tenório                 | 3.103   | 13   | 5   | 13   | 4   | 2   | 1  |
| PB | Triunfo                 | 9.473   | 39   | 14  | 37   | 12  | 4   | 2  |
| PB | Uiraúna                 | 15.356  | 63   | 22  | 60   | 19  | 6   | 2  |
| PB | Umbuzeiro               | 9.914   | 41   | 14  | 39   | 13  | 4   | 2  |
| PB | Várzea                  | 2.870   | 12   | 5   | 12   | 4   | 2   | 1  |
| PB | Vieirópolis             | 5.395   | 22   | 8   | 21   | 7   | 2   | 1  |
| PB | Zabelê                  | 2.269   | 10   | 4   | 9    | 3   | 1   | 1  |
| PE | Abreu e Lima            | 100.698 | 404  | 140 | 388  | 122 | 36  | 13 |
| PE | Afogados da Ingazeira   | 37.546  | 151  | 53  | 145  | 46  | 14  | 5  |
| PE | Afrânio                 | 19.981  | 81   | 28  | 77   | 25  | 8   | 3  |
| PE | Agrestina               | 25.240  | 102  | 36  | 98   | 31  | 9   | 4  |
| PE | Água Preta              | 37.386  | 150  | 52  | 144  | 46  | 14  | 5  |
| PE | Águas Belas             | 43.923  | 177  | 61  | 170  | 54  | 16  | 6  |
| PE | Alagoinha               | 14.798  | 60   | 21  | 57   | 18  | 6   | 2  |
| PE | Aliança                 | 38.408  | 154  | 54  | 148  | 47  | 14  | 5  |
| PE | Altinho                 | 22.996  | 93   | 32  | 89   | 28  | 9   | 3  |
| PE | Amaraji                 | 22.910  | 92   | 32  | 89   | 28  | 9   | 3  |
| PE | Angelim                 | 11.301  | 46   | 16  | 44   | 14  | 5   | 2  |
| PE | Araçoiaba               | 20.936  | 84   | 30  | 81   | 26  | 8   | 3  |
| PE | Araripina               | 85.301  | 342  | 119 | 329  | 104 | 31  | 11 |
| PE | Arcoverde               | 75.295  | 302  | 105 | 290  | 92  | 27  | 10 |
| PE | Barra de Guabiraba      | 14.632  | 59   | 21  | 57   | 18  | 6   | 2  |
| PE | Barreiros               | 42.866  | 172  | 60  | 166  | 52  | 16  | 6  |
| PE | Belém de Maria          | 12.169  | 49   | 17  | 47   | 15  | 5   | 2  |
| PE | Belém do São Francisco  | 20.730  | 84   | 29  | 80   | 26  | 8   | 3  |
| PE | Belo Jardim             | 76.930  | 309  | 107 | 297  | 94  | 28  | 10 |
| PE | Betânia                 | 12.811  | 52   | 18  | 50   | 16  | 5   | 2  |
| PE | Bezerros                | 60.960  | 245  | 85  | 235  | 74  | 22  | 8  |
| PE | Bodocó                  | 38.605  | 155  | 54  | 149  | 47  | 14  | 5  |
| PE | Bom Conselho            | 48.975  | 197  | 68  | 189  | 60  | 18  | 7  |
| PE | Bom Jardim              | 40.038  | 161  | 56  | 155  | 49  | 15  | 6  |
| PE | Bonito                  | 38.101  | 153  | 53  | 147  | 47  | 14  | 5  |
| PE | Brejão                  | 8.981   | 36   | 13  | 35   | 11  | 4   | 2  |
| PE | Brejinho                | 7.489   | 31   | 11  | 29   | 10  | 3   | 1  |
| PE | Brejo da Madre de Deus  | 51.696  | 208  | 72  | 200  | 63  | 19  | 7  |
| PE | Buenos Aires            | 13.224  | 53   | 19  | 51   | 16  | 5   | 2  |
| PE | Buique                  | 59.448  | 239  | 83  | 229  | 72  | 22  | 8  |
| PE | Cabo de Santo Agostinho | 210.796 | 845  | 293 | 812  | 255 | 76  | 27 |
| PE | Cabrobó                 | 34.778  | 140  | 49  | 134  | 43  | 13  | 5  |
| PE | Cachoeirinha            | 20.618  | 83   | 29  | 80   | 25  | 8   | 3  |
| PE | Caetés                  | 29.065  | 117  | 41  | 112  | 36  | 11  | 4  |
| PE | Calçado                 | 10.983  | 45   | 16  | 43   | 14  | 4   | 2  |
| PE | Calumbi                 | 5.744   | 24   | 8   | 23   | 7   | 3   | 1  |
| PE | Camragibe               | 159.945 | 641  | 222 | 616  | 194 | 57  | 21 |
| PE | Camocim de São Félix    | 19.032  | 77   | 27  | 74   | 24  | 7   | 3  |
| PE | Camutanga               | 8.592   | 35   | 12  | 34   | 11  | 4   | 2  |
| PE | Canhotinho              | 24.743  | 100  | 35  | 96   | 30  | 9   | 4  |
| PE | Capoeiras               | 20.048  | 81   | 28  | 78   | 25  | 8   | 3  |
| PE | Carnaíba                | 19.666  | 79   | 28  | 76   | 24  | 8   | 3  |
| PE | Carnaubeira da Penha    | 13.117  | 53   | 19  | 51   | 16  | 5   | 2  |
| PE | Carpina                 | 85.131  | 342  | 119 | 328  | 103 | 31  | 11 |
| PE | Caruaru                 | 369.343 | 1481 | 513 | 1423 | 447 | 132 | 48 |
| PE | Casinhas                | 14.395  | 58   | 20  | 56   | 18  | 6   | 2  |
| PE | Catende                 | 43.778  | 176  | 61  | 169  | 53  | 16  | 6  |
| PE | Cedro                   | 11.972  | 48   | 17  | 47   | 15  | 5   | 2  |
| PE | Chã de Alegria          | 13.641  | 55   | 19  | 53   | 17  | 5   | 2  |
| PE | Chã Grande              | 21.929  | 88   | 31  | 85   | 27  | 8   | 3  |
| PE | Condado                 | 26.755  | 108  | 38  | 104  | 33  | 10  | 4  |

|    |                         |         |      |     |      |     |     |    |
|----|-------------------------|---------|------|-----|------|-----|-----|----|
| PE | Correntes               | 18.327  | 74   | 26  | 71   | 23  | 7   | 3  |
| PE | Cortês                  | 12.543  | 51   | 18  | 49   | 16  | 5   | 2  |
| PE | Cumaru                  | 9.494   | 39   | 14  | 37   | 12  | 4   | 2  |
| PE | Cupira                  | 24.237  | 98   | 34  | 94   | 30  | 9   | 4  |
| PE | Custódia                | 37.633  | 151  | 53  | 145  | 46  | 14  | 5  |
| PE | Dormentes               | 19.246  | 78   | 27  | 75   | 24  | 7   | 3  |
| PE | Escada                  | 69.701  | 280  | 97  | 269  | 85  | 25  | 9  |
| PE | Exu                     | 31.709  | 128  | 44  | 123  | 39  | 12  | 5  |
| PE | Feira Nova              | 22.360  | 90   | 32  | 87   | 28  | 8   | 3  |
| PE | Fernando de Noronha     | 3.140   | 13   | 5   | 13   | 4   | 2   | 1  |
| PE | Ferreiros               | 12.216  | 49   | 17  | 48   | 15  | 5   | 2  |
| PE | Flores                  | 22.612  | 91   | 32  | 88   | 28  | 9   | 3  |
| PE | Floresta                | 33.488  | 135  | 47  | 129  | 41  | 12  | 5  |
| PE | Frei Miguelinho         | 15.633  | 63   | 22  | 61   | 19  | 6   | 2  |
| PE | Gameleira               | 31.578  | 127  | 44  | 122  | 39  | 12  | 5  |
| PE | Garanhuns               | 141.347 | 567  | 197 | 545  | 171 | 51  | 19 |
| PE | Glória do Goitá         | 30.847  | 124  | 43  | 119  | 38  | 11  | 4  |
| PE | Goiana                  | 80.345  | 322  | 112 | 310  | 98  | 29  | 11 |
| PE | Granito                 | 7.586   | 31   | 11  | 30   | 10  | 3   | 1  |
| PE | Gravatá                 | 85.309  | 342  | 119 | 329  | 104 | 31  | 11 |
| PE | Iati                    | 19.284  | 78   | 27  | 75   | 24  | 7   | 3  |
| PE | Ibimirim                | 29.585  | 119  | 42  | 114  | 36  | 11  | 4  |
| PE | Ibirajuba               | 7.773   | 32   | 11  | 30   | 10  | 3   | 1  |
| PE | Igarassu                | 119.690 | 480  | 167 | 461  | 145 | 43  | 16 |
| PE | Iguaracy                | 12.265  | 50   | 18  | 48   | 15  | 5   | 2  |
| PE | Inajá                   | 24.034  | 97   | 34  | 93   | 30  | 9   | 4  |
| PE | Ingazeira               | 4.537   | 19   | 7   | 18   | 6   | 2   | 1  |
| PE | Ipojuca                 | 99.101  | 398  | 138 | 382  | 120 | 36  | 13 |
| PE | Ipubi                   | 31.515  | 127  | 44  | 122  | 39  | 12  | 5  |
| PE | Itacuruba               | 5.013   | 21   | 7   | 20   | 7   | 2   | 1  |
| PE | Itaíba                  | 26.268  | 106  | 37  | 102  | 32  | 10  | 4  |
| PE | Ilha de Itamaracá       | 27.076  | 109  | 38  | 105  | 33  | 10  | 4  |
| PE | Itambé                  | 36.495  | 147  | 51  | 141  | 45  | 13  | 5  |
| PE | Itapetim                | 13.492  | 55   | 19  | 52   | 17  | 5   | 2  |
| PE | Itapissuma              | 27.144  | 109  | 38  | 105  | 33  | 10  | 4  |
| PE | Itaquitinga             | 17.056  | 69   | 24  | 66   | 21  | 7   | 3  |
| PE | Jaboatão dos Guararapes | 711.330 | 2851 | 987 | 2739 | 861 | 254 | 91 |
| PE | Jaqueira                | 11.632  | 47   | 17  | 45   | 15  | 5   | 2  |
| PE | Jataúba                 | 17.305  | 70   | 25  | 67   | 21  | 7   | 3  |
| PE | Jatobá                  | 14.904  | 60   | 21  | 58   | 19  | 6   | 2  |
| PE | João Alfredo            | 33.570  | 135  | 47  | 130  | 41  | 12  | 5  |
| PE | Joaquim Nabuco          | 15.999  | 65   | 23  | 62   | 20  | 6   | 3  |
| PE | Jucati                  | 11.545  | 47   | 17  | 45   | 14  | 5   | 2  |
| PE | Jupi                    | 15.007  | 61   | 21  | 58   | 19  | 6   | 2  |
| PE | Jurema                  | 15.483  | 63   | 22  | 60   | 19  | 6   | 2  |
| PE | Lagoa do Carro          | 18.429  | 74   | 26  | 71   | 23  | 7   | 3  |
| PE | Lagoa de Itaenga        | 21.490  | 87   | 30  | 83   | 26  | 8   | 3  |
| PE | Lagoa do Ouro           | 13.300  | 54   | 19  | 52   | 17  | 5   | 2  |
| PE | Lagoa dos Gatos         | 16.345  | 66   | 23  | 63   | 20  | 6   | 3  |
| PE | Lagoa Grande            | 26.090  | 105  | 37  | 101  | 32  | 10  | 4  |
| PE | Lajedo                  | 40.883  | 164  | 57  | 158  | 50  | 15  | 6  |
| PE | Limoeiro                | 56.149  | 226  | 78  | 217  | 68  | 20  | 8  |
| PE | Macaparana              | 25.565  | 103  | 36  | 99   | 31  | 10  | 4  |
| PE | Machados                | 16.549  | 67   | 23  | 64   | 21  | 6   | 3  |
| PE | Manari                  | 22.110  | 89   | 31  | 86   | 27  | 8   | 3  |
| PE | Maraial                 | 11.098  | 45   | 16  | 43   | 14  | 4   | 2  |
| PE | Mirandiba               | 15.548  | 63   | 22  | 60   | 19  | 6   | 2  |
| PE | Moreno                  | 63.792  | 256  | 89  | 246  | 78  | 23  | 9  |
| PE | Nazaré da Mata          | 32.673  | 131  | 46  | 126  | 40  | 12  | 5  |
| PE | Olinda                  | 393.734 | 1578 | 547 | 1516 | 477 | 141 | 51 |
| PE | Orobó                   | 23.985  | 97   | 34  | 93   | 29  | 9   | 4  |
| PE | Orocó                   | 15.309  | 62   | 22  | 59   | 19  | 6   | 2  |
| PE | Ouricuri                | 70.466  | 283  | 98  | 272  | 86  | 26  | 10 |
| PE | Palmares                | 63.745  | 256  | 89  | 246  | 78  | 23  | 9  |
| PE | Palmeirina              | 7.509   | 31   | 11  | 29   | 10  | 3   | 1  |
| PE | Panelas                 | 26.438  | 106  | 37  | 102  | 32  | 10  | 4  |



|    |                           |           |      |      |      |      |     |     |
|----|---------------------------|-----------|------|------|------|------|-----|-----|
| PE | Paranatama                | 11.608    | 47   | 17   | 45   | 15   | 5   | 2   |
| PE | Parnamirim                | 22.198    | 89   | 31   | 86   | 27   | 8   | 3   |
| PE | Passira                   | 28.856    | 116  | 41   | 112  | 35   | 11  | 4   |
| PE | Paudalho                  | 57.346    | 230  | 80   | 221  | 70   | 21  | 8   |
| PE | Paulista                  | 336.919   | 1351 | 468  | 1298 | 408  | 120 | 44  |
| PE | Pedra                     | 22.716    | 92   | 32   | 88   | 28   | 9   | 3   |
| PE | Pesqueira                 | 68.067    | 273  | 95   | 263  | 83   | 25  | 9   |
| PE | Petrolândia               | 37.246    | 150  | 52   | 144  | 46   | 14  | 5   |
| PE | Petrolina                 | 359.372   | 1441 | 499  | 1384 | 435  | 128 | 46  |
| PE | Poção                     | 11.308    | 46   | 16   | 44   | 14   | 5   | 2   |
| PE | Pombos                    | 27.204    | 110  | 38   | 105  | 33   | 10  | 4   |
| PE | Primavera                 | 15.231    | 62   | 22   | 59   | 19   | 6   | 2   |
| PE | Quipapá                   | 26.309    | 106  | 37   | 102  | 32   | 10  | 4   |
| PE | Quixaba                   | 6.796     | 28   | 10   | 27   | 9    | 3   | 1   |
| PE | Recife                    | 1.661.017 | 6657 | 2305 | 6396 | 2009 | 592 | 213 |
| PE | Riacho das Almas          | 20.744    | 84   | 29   | 80   | 26   | 8   | 3   |
| PE | Ribeirão                  | 47.813    | 192  | 67   | 185  | 58   | 18  | 7   |
| PE | Rio Formoso               | 23.719    | 96   | 33   | 92   | 29   | 9   | 4   |
| PE | Sairé                     | 9.600     | 39   | 14   | 37   | 12   | 4   | 2   |
| PE | Salgadinho                | 11.214    | 45   | 16   | 44   | 14   | 4   | 2   |
| PE | Salgueiro                 | 61.561    | 247  | 86   | 238  | 75   | 22  | 8   |
| PE | Saloá                     | 15.880    | 64   | 23   | 62   | 20   | 6   | 3   |
| PE | Sanharó                   | 27.308    | 110  | 38   | 106  | 34   | 10  | 4   |
| PE | Santa Cruz                | 15.713    | 63   | 22   | 61   | 19   | 6   | 3   |
| PE | Santa Cruz da Baixa Verde | 12.708    | 51   | 18   | 49   | 16   | 5   | 2   |
| PE | Santa Cruz do Capibaribe  | 111.812   | 449  | 156  | 431  | 136  | 40  | 15  |
| PE | Santa Filomena            | 14.645    | 59   | 21   | 57   | 18   | 6   | 2   |
| PE | Santa Maria da Boa Vista  | 42.266    | 170  | 59   | 163  | 52   | 16  | 6   |
| PE | Santa Maria do Cambucá    | 14.308    | 58   | 20   | 56   | 18   | 6   | 2   |
| PE | Santa Terezinha           | 11.914    | 48   | 17   | 46   | 15   | 5   | 2   |
| PE | São Benedito do Sul       | 16.239    | 66   | 23   | 63   | 20   | 6   | 3   |
| PE | São Bento do Una          | 60.567    | 243  | 85   | 234  | 74   | 22  | 8   |
| PE | São Caitano               | 37.488    | 151  | 53   | 145  | 46   | 14  | 5   |
| PE | São João                  | 23.002    | 93   | 32   | 89   | 28   | 9   | 3   |
| PE | São Joaquim do Monte      | 21.439    | 86   | 30   | 83   | 26   | 8   | 3   |
| PE | São José da Coroa Grande  | 21.868    | 88   | 31   | 85   | 27   | 8   | 3   |
| PE | São José do Belmonte      | 34.082    | 137  | 48   | 132  | 42   | 13  | 5   |
| PE | São José do Egito         | 34.210    | 138  | 48   | 132  | 42   | 13  | 5   |
| PE | São Lourenço da Mata      | 114.910   | 461  | 160  | 443  | 139  | 41  | 15  |
| PE | São Vicente Férrer        | 18.150    | 73   | 26   | 70   | 22   | 7   | 3   |
| PE | Serra Talhada             | 87.467    | 351  | 122  | 337  | 106  | 32  | 12  |
| PE | Serrita                   | 19.226    | 78   | 27   | 75   | 24   | 7   | 3   |
| PE | Sertânia                  | 36.189    | 146  | 51   | 140  | 44   | 13  | 5   |
| PE | Sirinhaém                 | 46.845    | 188  | 65   | 181  | 57   | 17  | 6   |
| PE | Moreilândia               | 11.269    | 46   | 16   | 44   | 14   | 5   | 2   |
| PE | Solidão                   | 6.034     | 25   | 9    | 24   | 8    | 3   | 1   |
| PE | Surubim                   | 66.192    | 266  | 92   | 255  | 81   | 24  | 9   |
| PE | Tabira                    | 28.860    | 116  | 41   | 112  | 35   | 11  | 4   |
| PE | Tacaimbó                  | 12.843    | 52   | 18   | 50   | 16   | 5   | 2   |
| PE | Tacaratu                  | 26.439    | 106  | 37   | 102  | 32   | 10  | 4   |
| PE | Tamandaré                 | 23.852    | 96   | 34   | 92   | 29   | 9   | 4   |
| PE | Taquaritinga do Norte     | 29.472    | 119  | 41   | 114  | 36   | 11  | 4   |
| PE | Terezinha                 | 7.227     | 29   | 11   | 28   | 9    | 3   | 1   |
| PE | Terra Nova                | 10.314    | 42   | 15   | 40   | 13   | 4   | 2   |
| PE | Timbaúba                  | 52.587    | 211  | 73   | 203  | 64   | 19  | 7   |
| PE | Toritama                  | 47.088    | 189  | 66   | 182  | 57   | 17  | 7   |
| PE | Tracunhaém                | 13.856    | 56   | 20   | 54   | 17   | 5   | 2   |
| PE | Trindade                  | 31.103    | 125  | 44   | 120  | 38   | 12  | 4   |
| PE | Triunfo                   | 15.232    | 62   | 22   | 59   | 19   | 6   | 2   |
| PE | Tupanatinga               | 27.793    | 112  | 39   | 108  | 34   | 10  | 4   |
| PE | Tuparetama                | 8.266     | 34   | 12   | 32   | 10   | 3   | 2   |
| PE | Venturosa                 | 18.835    | 76   | 27   | 73   | 23   | 7   | 3   |
| PE | Verdejante                | 9.572     | 39   | 14   | 37   | 12   | 4   | 2   |
| PE | Vertente do Lério         | 7.526     | 31   | 11   | 29   | 10   | 3   | 1   |
| PE | Vertentes                 | 21.172    | 85   | 30   | 82   | 26   | 8   | 3   |
| PE | Vicência                  | 32.897    | 132  | 46   | 127  | 40   | 12  | 5   |

|    |                        |           |      |      |      |      |     |     |
|----|------------------------|-----------|------|------|------|------|-----|-----|
| PE | Vitória de Santo Antão | 140.389   | 563  | 195  | 541  | 170  | 50  | 18  |
| PE | Xexéu                  | 14.789    | 60   | 21   | 57   | 18   | 6   | 2   |
| AL | Água Branca            | 20.263    | 79   | 28   | 76   | 24   | 7   | 3   |
| AL | Anadia                 | 17.507    | 68   | 24   | 66   | 21   | 7   | 3   |
| AL | Arapiraca              | 234.309   | 907  | 314  | 871  | 274  | 81  | 29  |
| AL | Atalaia                | 47.540    | 184  | 64   | 177  | 56   | 17  | 6   |
| AL | Barra de Santo Antônio | 16.201    | 63   | 22   | 61   | 19   | 6   | 2   |
| AL | Barra de São Miguel    | 8.434     | 33   | 12   | 32   | 10   | 3   | 2   |
| AL | Batalha                | 18.440    | 72   | 25   | 69   | 22   | 7   | 3   |
| AL | Belém                  | 4.226     | 17   | 6    | 16   | 5    | 2   | 1   |
| AL | Belo Monte             | 6.717     | 26   | 9    | 25   | 8    | 3   | 1   |
| AL | Boca da Mata           | 27.429    | 107  | 37   | 102  | 32   | 10  | 4   |
| AL | Branquinha             | 10.426    | 41   | 14   | 39   | 13   | 4   | 2   |
| AL | Cacimbinhas            | 10.920    | 43   | 15   | 41   | 13   | 4   | 2   |
| AL | Cajueiro               | 21.397    | 83   | 29   | 80   | 25   | 8   | 3   |
| AL | Campestre              | 6.972     | 27   | 10   | 26   | 9    | 3   | 1   |
| AL | Campo Alegre           | 57.997    | 225  | 78   | 216  | 68   | 20  | 8   |
| AL | Campo Grande           | 9.576     | 38   | 13   | 36   | 12   | 4   | 2   |
| AL | Canapi                 | 17.715    | 69   | 24   | 66   | 21   | 7   | 3   |
| AL | Capela                 | 16.907    | 66   | 23   | 63   | 20   | 6   | 3   |
| AL | Carneiros              | 9.568     | 37   | 13   | 36   | 12   | 4   | 2   |
| AL | Chã Preta              | 7.311     | 29   | 10   | 28   | 9    | 3   | 1   |
| AL | Coité do Nóia          | 10.594    | 41   | 15   | 40   | 13   | 4   | 2   |
| AL | Colônia Leopoldina     | 21.935    | 85   | 30   | 82   | 26   | 8   | 3   |
| AL | Coqueiro Seco          | 5.882     | 23   | 8    | 22   | 7    | 3   | 1   |
| AL | Coruripe               | 57.647    | 223  | 78   | 215  | 68   | 20  | 8   |
| AL | Craibas                | 24.396    | 95   | 33   | 91   | 29   | 9   | 4   |
| AL | Delmiro Gouveia        | 52.501    | 204  | 71   | 196  | 62   | 19  | 7   |
| AL | Dois Riachos           | 11.059    | 43   | 15   | 42   | 13   | 4   | 2   |
| AL | Estrela de Alagoas     | 18.304    | 71   | 25   | 69   | 22   | 7   | 3   |
| AL | Feira Grande           | 22.192    | 86   | 30   | 83   | 26   | 8   | 3   |
| AL | Feliz Deserto          | 4.803     | 19   | 7    | 18   | 6    | 2   | 1   |
| AL | Flexeiras              | 12.823    | 50   | 18   | 48   | 15   | 5   | 2   |
| AL | Girau do Ponciano      | 41.549    | 161  | 56   | 155  | 49   | 15  | 6   |
| AL | Ibateguara             | 15.637    | 61   | 21   | 59   | 19   | 6   | 2   |
| AL | Igaci                  | 25.596    | 99   | 35   | 96   | 30   | 9   | 4   |
| AL | Igreja Nova            | 24.670    | 96   | 34   | 92   | 29   | 9   | 4   |
| AL | Inhapi                 | 18.398    | 72   | 25   | 69   | 22   | 7   | 3   |
| AL | Jacaré dos Homens      | 5.185     | 21   | 7    | 20   | 7    | 2   | 1   |
| AL | Jacuípe                | 6.992     | 28   | 10   | 26   | 9    | 3   | 1   |
| AL | Japaratinga            | 8.444     | 33   | 12   | 32   | 10   | 3   | 2   |
| AL | Jaramataia             | 5.751     | 23   | 8    | 22   | 7    | 2   | 1   |
| AL | Jequiá da Praia        | 11.495    | 45   | 16   | 43   | 14   | 4   | 2   |
| AL | Joaquim Gomes          | 24.167    | 94   | 33   | 90   | 29   | 9   | 3   |
| AL | Jundiá                 | 4.119     | 16   | 6    | 16   | 5    | 2   | 1   |
| AL | Junqueiro              | 24.716    | 96   | 34   | 92   | 29   | 9   | 4   |
| AL | Lagoa da Canoa         | 17.692    | 69   | 24   | 66   | 21   | 7   | 3   |
| AL | Limoeiro de Anadia     | 28.904    | 112  | 39   | 108  | 34   | 10  | 4   |
| AL | Maceió                 | 1.031.597 | 3989 | 1381 | 3833 | 1204 | 355 | 128 |
| AL | Major Isidoro          | 19.923    | 78   | 27   | 75   | 24   | 7   | 3   |
| AL | Maragogi               | 33.351    | 129  | 45   | 124  | 39   | 12  | 5   |
| AL | Maravilha              | 8.850     | 35   | 12   | 33   | 11   | 4   | 2   |
| AL | Marechal Deodoro       | 52.848    | 205  | 71   | 197  | 62   | 19  | 7   |
| AL | Maribondo              | 13.123    | 51   | 18   | 49   | 16   | 5   | 2   |
| AL | Mar Vermelho           | 3.474     | 14   | 5    | 13   | 5    | 2   | 1   |
| AL | Mata Grande            | 25.200    | 98   | 34   | 94   | 30   | 9   | 4   |
| AL | Matriz de Camaragibe   | 24.627    | 96   | 33   | 92   | 29   | 9   | 4   |
| AL | Messias                | 18.201    | 71   | 25   | 68   | 22   | 7   | 3   |
| AL | Minador do Negrão      | 5.315     | 21   | 8    | 20   | 7    | 2   | 1   |
| AL | Monteirópolis          | 7.171     | 28   | 10   | 27   | 9    | 3   | 1   |
| AL | Murici                 | 28.428    | 110  | 39   | 106  | 34   | 10  | 4   |
| AL | Novo Lino              | 12.837    | 50   | 18   | 48   | 15   | 5   | 2   |
| AL | Olho d'Água das Flores | 21.690    | 84   | 30   | 81   | 26   | 8   | 3   |
| AL | Olho d'Água do Casado  | 9.507     | 37   | 13   | 36   | 12   | 4   | 2   |
| AL | Olho d'Água Grande     | 5.133     | 20   | 7    | 20   | 6    | 2   | 1   |
| AL | Olivença               | 11.681    | 46   | 16   | 44   | 14   | 5   | 2   |

|    |                          |         |      |     |      |     |     |    |
|----|--------------------------|---------|------|-----|------|-----|-----|----|
| AL | Ouro Branco              | 11.573  | 45   | 16  | 43   | 14  | 4   | 2  |
| AL | Palestina                | 5.061   | 20   | 7   | 19   | 6   | 2   | 1  |
| AL | Palmeira dos Índios      | 73.452  | 285  | 99  | 273  | 86  | 26  | 10 |
| AL | Pão de Açúcar            | 24.307  | 94   | 33  | 91   | 29  | 9   | 3  |
| AL | Pariconha                | 10.546  | 41   | 15  | 40   | 13  | 4   | 2  |
| AL | Paripueira               | 13.484  | 53   | 19  | 51   | 16  | 5   | 2  |
| AL | Passo de Camaragibe      | 15.270  | 60   | 21  | 57   | 18  | 6   | 2  |
| AL | Paulo Jacinto            | 7.556   | 30   | 11  | 29   | 9   | 3   | 1  |
| AL | Penedo                   | 64.005  | 248  | 86  | 238  | 75  | 22  | 8  |
| AL | Piaçabuçu                | 17.868  | 70   | 24  | 67   | 21  | 7   | 3  |
| AL | Pilar                    | 35.310  | 137  | 48  | 132  | 42  | 13  | 5  |
| AL | Pindoba                  | 2.903   | 12   | 4   | 11   | 4   | 1   | 1  |
| AL | Piranhas                 | 25.324  | 98   | 34  | 95   | 30  | 9   | 4  |
| AL | Poço das Trincheiras     | 14.447  | 56   | 20  | 54   | 17  | 5   | 2  |
| AL | Porto Calvo              | 27.331  | 106  | 37  | 102  | 32  | 10  | 4  |
| AL | Porto de Pedras          | 7.618   | 30   | 11  | 29   | 9   | 3   | 1  |
| AL | Porto Real do Colégio    | 20.158  | 78   | 27  | 75   | 24  | 7   | 3  |
| AL | Quebrangulo              | 11.202  | 44   | 15  | 42   | 14  | 4   | 2  |
| AL | Rio Largo                | 75.662  | 293  | 102 | 282  | 89  | 26  | 10 |
| AL | Roteiro                  | 6.634   | 26   | 9   | 25   | 8   | 3   | 1  |
| AL | Santa Luzia do Norte     | 7.344   | 29   | 10  | 28   | 9   | 3   | 1  |
| AL | Santana do Ipanema       | 47.910  | 186  | 65  | 178  | 56  | 17  | 6  |
| AL | Santana do Mundaú        | 10.637  | 42   | 15  | 40   | 13  | 4   | 2  |
| AL | São Brás                 | 6.977   | 27   | 10  | 26   | 9   | 3   | 1  |
| AL | São José da Laje         | 24.064  | 94   | 33  | 90   | 29  | 9   | 3  |
| AL | São José da Tapera       | 32.462  | 126  | 44  | 121  | 38  | 12  | 5  |
| AL | São Luís do Quitunde     | 34.825  | 135  | 47  | 130  | 41  | 12  | 5  |
| AL | São Miguel dos Campos    | 62.328  | 242  | 84  | 232  | 73  | 22  | 8  |
| AL | São Miguel dos Milagres  | 8.073   | 32   | 11  | 30   | 10  | 3   | 1  |
| AL | São Sebastião            | 34.424  | 134  | 47  | 128  | 41  | 12  | 5  |
| AL | Satuba                   | 14.042  | 55   | 19  | 53   | 17  | 5   | 2  |
| AL | Senador Rui Palmeira     | 13.893  | 54   | 19  | 52   | 17  | 5   | 2  |
| AL | Tanque d'Arca            | 6.115   | 24   | 9   | 23   | 8   | 3   | 1  |
| AL | Taquarana                | 20.162  | 78   | 27  | 75   | 24  | 7   | 3  |
| AL | Teotônio Vilela          | 44.570  | 173  | 60  | 166  | 52  | 16  | 6  |
| AL | Traipu                   | 27.934  | 109  | 38  | 104  | 33  | 10  | 4  |
| AL | União dos Palmares       | 65.963  | 256  | 89  | 246  | 77  | 23  | 9  |
| AL | Viçosa                   | 25.655  | 100  | 35  | 96   | 30  | 9   | 4  |
| SE | Amparo do São Francisco  | 2.386   | 10   | 4   | 10   | 3   | 1   | 1  |
| SE | Aquidabã                 | 21.796  | 87   | 31  | 84   | 27  | 8   | 3  |
| SE | Aracaju                  | 672.614 | 2684 | 929 | 2578 | 810 | 239 | 86 |
| SE | Araúá                    | 9.840   | 40   | 14  | 38   | 12  | 4   | 2  |
| SE | Areia Branca             | 18.825  | 76   | 26  | 73   | 23  | 7   | 3  |
| SE | Barra dos Coqueiros      | 31.439  | 126  | 44  | 121  | 38  | 12  | 4  |
| SE | Boquim                   | 26.980  | 108  | 38  | 104  | 33  | 10  | 4  |
| SE | Brejo Grande             | 8.396   | 34   | 12  | 33   | 11  | 3   | 2  |
| SE | Campo do Brito           | 18.325  | 74   | 26  | 71   | 23  | 7   | 3  |
| SE | Canhoba                  | 4.003   | 16   | 6   | 16   | 5   | 2   | 1  |
| SE | Canindé de São Francisco | 30.894  | 124  | 43  | 119  | 38  | 11  | 4  |
| SE | Capela                   | 34.808  | 139  | 49  | 134  | 42  | 13  | 5  |
| SE | Carira                   | 22.393  | 90   | 31  | 86   | 27  | 8   | 3  |
| SE | Carmópolis               | 17.232  | 69   | 24  | 67   | 21  | 7   | 3  |
| SE | Cedro de São João        | 5.929   | 24   | 9   | 23   | 8   | 3   | 1  |
| SE | Cristinápolis            | 18.181  | 73   | 26  | 70   | 22  | 7   | 3  |
| SE | Cumbe                    | 4.008   | 16   | 6   | 16   | 5   | 2   | 1  |
| SE | Divina Pastora           | 5.290   | 22   | 8   | 21   | 7   | 2   | 1  |
| SE | Estância                 | 69.919  | 279  | 97  | 268  | 85  | 25  | 9  |
| SE | Feira Nova               | 5.617   | 23   | 8   | 22   | 7   | 2   | 1  |
| SE | Frei Paulo               | 15.688  | 63   | 22  | 61   | 19  | 6   | 2  |
| SE | Gararu                   | 11.599  | 47   | 17  | 45   | 14  | 5   | 2  |
| SE | General Maynard          | 3.421   | 14   | 5   | 14   | 5   | 2   | 1  |
| SE | Gracho Cardoso           | 5.831   | 24   | 9   | 23   | 8   | 3   | 1  |
| SE | Ilha das Flores          | 8.522   | 34   | 12  | 33   | 11  | 4   | 2  |
| SE | Indiaroba                | 18.337  | 74   | 26  | 71   | 23  | 7   | 3  |
| SE | Itabaiana                | 96.839  | 387  | 134 | 372  | 117 | 35  | 13 |
| SE | Itabaianinha             | 42.399  | 170  | 59  | 163  | 52  | 16  | 6  |

|    |                          |         |     |     |     |     |    |    |
|----|--------------------------|---------|-----|-----|-----|-----|----|----|
| SE | Itabi                    | 4.869   | 20  | 7   | 19  | 6   | 2  | 1  |
| SE | Itaporanga d'Ajuda       | 35.054  | 140 | 49  | 135 | 43  | 13 | 5  |
| SE | Japarutuba               | 19.067  | 77  | 27  | 74  | 23  | 7  | 3  |
| SE | Japoatã                  | 13.422  | 54  | 19  | 52  | 17  | 5  | 2  |
| SE | Lagarto                  | 106.015 | 423 | 147 | 407 | 128 | 38 | 14 |
| SE | Laranjeiras              | 30.327  | 121 | 42  | 117 | 37  | 11 | 4  |
| SE | Macambira                | 7.002   | 28  | 10  | 27  | 9   | 3  | 1  |
| SE | Malhada dos Bois         | 3.715   | 15  | 6   | 15  | 5   | 2  | 1  |
| SE | Malhador                 | 12.689  | 51  | 18  | 49  | 16  | 5  | 2  |
| SE | Maruim                   | 17.328  | 70  | 24  | 67  | 21  | 7  | 3  |
| SE | Moita Bonita             | 11.361  | 46  | 16  | 44  | 14  | 5  | 2  |
| SE | Monte Alegre de Sergipe  | 15.315  | 62  | 22  | 59  | 19  | 6  | 2  |
| SE | Muribeca                 | 7.653   | 31  | 11  | 30  | 10  | 3  | 1  |
| SE | Neópolis                 | 18.688  | 75  | 26  | 72  | 23  | 7  | 3  |
| SE | Nossa Senhora Aparecida  | 8.822   | 36  | 13  | 34  | 11  | 4  | 2  |
| SE | Nossa Senhora da Glória  | 37.715  | 151 | 53  | 145 | 46  | 14 | 5  |
| SE | Nossa Senhora das Dores  | 26.957  | 108 | 38  | 104 | 33  | 10 | 4  |
| SE | Nossa Senhora de Lourdes | 6.509   | 26  | 9   | 25  | 8   | 3  | 1  |
| SE | Nossa Senhora do Socorro | 187.733 | 749 | 260 | 720 | 226 | 67 | 24 |
| SE | Pacatuba                 | 14.650  | 59  | 21  | 57  | 18  | 6  | 2  |
| SE | Pedra Mole               | 3.309   | 14  | 5   | 13  | 4   | 2  | 1  |
| SE | Pedrinhas                | 9.727   | 39  | 14  | 38  | 12  | 4  | 2  |
| SE | Pinhão                   | 6.678   | 27  | 10  | 26  | 9   | 3  | 1  |
| SE | Pirambu                  | 9.436   | 38  | 14  | 37  | 12  | 4  | 2  |
| SE | Poço Redondo             | 35.461  | 142 | 49  | 136 | 43  | 13 | 5  |
| SE | Poço Verde               | 24.003  | 96  | 34  | 92  | 29  | 9  | 4  |
| SE | Porto da Folha           | 28.788  | 115 | 40  | 111 | 35  | 11 | 4  |
| SE | Propriá                  | 29.756  | 119 | 42  | 115 | 36  | 11 | 4  |
| SE | Riachão do Dantas        | 19.813  | 80  | 28  | 76  | 24  | 8  | 3  |
| SE | Riachuelo                | 10.354  | 42  | 15  | 40  | 13  | 4  | 2  |
| SE | Ribeirópolis             | 18.891  | 76  | 27  | 73  | 23  | 7  | 3  |
| SE | Rosário do Catete        | 11.158  | 45  | 16  | 43  | 14  | 4  | 2  |
| SE | Salgado                  | 20.051  | 80  | 28  | 77  | 25  | 8  | 3  |
| SE | Santa Luzia do Itanhhy   | 14.205  | 57  | 20  | 55  | 18  | 6  | 2  |
| SE | Santana do São Francisco | 7.906   | 32  | 11  | 31  | 10  | 3  | 2  |
| SE | Santa Rosa de Lima       | 3.933   | 16  | 6   | 16  | 5   | 2  | 1  |
| SE | Santo Amaro das Brotas   | 12.200  | 49  | 17  | 47  | 15  | 5  | 2  |
| SE | São Cristóvão            | 92.090  | 368 | 128 | 353 | 111 | 33 | 12 |
| SE | São Domingos             | 11.276  | 45  | 16  | 44  | 14  | 4  | 2  |
| SE | São Francisco            | 3.837   | 16  | 6   | 15  | 5   | 2  | 1  |
| SE | São Miguel do Aleixo     | 3.964   | 16  | 6   | 16  | 5   | 2  | 1  |
| SE | Simão Dias               | 40.724  | 163 | 57  | 157 | 50  | 15 | 6  |
| SE | Siriri                   | 9.046   | 37  | 13  | 35  | 11  | 4  | 2  |
| SE | Telha                    | 3.271   | 14  | 5   | 13  | 4   | 2  | 1  |
| SE | Tobias Barreto           | 52.861  | 211 | 73  | 203 | 64  | 19 | 7  |
| SE | Tomar do Geru            | 13.534  | 54  | 19  | 52  | 17  | 5  | 2  |
| SE | Umbaúba                  | 25.800  | 103 | 36  | 99  | 32  | 10 | 4  |
| BA | Abaira                   | 8.681   | 36  | 13  | 34  | 11  | 4  | 2  |
| BA | Abaré                    | 20.594  | 84  | 29  | 81  | 26  | 8  | 3  |
| BA | Acajutiba                | 15.214  | 62  | 22  | 60  | 19  | 6  | 2  |
| BA | Adustina                 | 17.209  | 70  | 25  | 68  | 22  | 7  | 3  |
| BA | Água Fria                | 17.096  | 70  | 25  | 67  | 21  | 7  | 3  |
| BA | Érico Cardoso            | 10.513  | 43  | 15  | 41  | 13  | 4  | 2  |
| BA | Aiquara                  | 4.387   | 18  | 7   | 18  | 6   | 2  | 1  |
| BA | Alagoinhas               | 153.023 | 621 | 215 | 597 | 188 | 56 | 20 |
| BA | Alcobaça                 | 22.509  | 92  | 32  | 88  | 28  | 9  | 3  |
| BA | Almadina                 | 5.273   | 22  | 8   | 21  | 7   | 2  | 1  |
| BA | Amargosa                 | 37.631  | 153 | 53  | 147 | 47  | 14 | 5  |
| BA | Amélia Rodrigues         | 24.997  | 102 | 36  | 98  | 31  | 10 | 4  |
| BA | América Dourada          | 16.086  | 66  | 23  | 63  | 20  | 6  | 3  |
| BA | Anagé                    | 21.229  | 87  | 30  | 83  | 26  | 8  | 3  |
| BA | Andaraí                  | 13.122  | 54  | 19  | 52  | 17  | 5  | 2  |
| BA | Andorinha                | 14.416  | 59  | 21  | 57  | 18  | 6  | 2  |
| BA | Angical                  | 13.902  | 57  | 20  | 55  | 18  | 6  | 2  |
| BA | Anguera                  | 11.369  | 47  | 16  | 45  | 14  | 5  | 2  |
| BA | Antas                    | 19.659  | 80  | 28  | 77  | 25  | 8  | 3  |

|    |                         |         |      |     |      |     |     |    |
|----|-------------------------|---------|------|-----|------|-----|-----|----|
| BA | Antônio Cardoso         | 11.670  | 48   | 17  | 46   | 15  | 5   | 2  |
| BA | Antônio Gonçalves       | 11.955  | 49   | 17  | 47   | 15  | 5   | 2  |
| BA | Aporá                   | 17.840  | 73   | 26  | 70   | 22  | 7   | 3  |
| BA | Apuarema                | 7.274   | 30   | 11  | 29   | 9   | 3   | 1  |
| BA | Aracatu                 | 12.960  | 53   | 19  | 51   | 16  | 5   | 2  |
| BA | Araçás                  | 12.237  | 50   | 18  | 48   | 15  | 5   | 2  |
| BA | Araci                   | 54.903  | 223  | 78  | 214  | 68  | 20  | 8  |
| BA | Aramari                 | 11.519  | 47   | 17  | 45   | 15  | 5   | 2  |
| BA | Arataca                 | 10.904  | 45   | 16  | 43   | 14  | 4   | 2  |
| BA | Aratuípe                | 8.848   | 36   | 13  | 35   | 11  | 4   | 2  |
| BA | Aurelino Leal           | 11.079  | 45   | 16  | 44   | 14  | 4   | 2  |
| BA | Baianópolis             | 13.979  | 57   | 20  | 55   | 18  | 6   | 2  |
| BA | Baixa Grande            | 20.431  | 83   | 29  | 80   | 26  | 8   | 3  |
| BA | Banzaê                  | 13.251  | 54   | 19  | 52   | 17  | 5   | 2  |
| BA | Barra                   | 54.225  | 220  | 77  | 212  | 67  | 20  | 8  |
| BA | Barra da Estiva         | 20.198  | 82   | 29  | 79   | 25  | 8   | 3  |
| BA | Barra do Choça          | 30.831  | 126  | 44  | 121  | 38  | 12  | 4  |
| BA | Barra do Mendes         | 13.128  | 54   | 19  | 52   | 17  | 5   | 2  |
| BA | Barra do Rocha          | 5.515   | 23   | 8   | 22   | 7   | 2   | 1  |
| BA | Barreiras               | 158.432 | 643  | 223 | 618  | 194 | 58  | 21 |
| BA | Barro Alto              | 15.171  | 62   | 22  | 60   | 19  | 6   | 2  |
| BA | Barrocas                | 16.225  | 66   | 23  | 64   | 20  | 6   | 3  |
| BA | Barro Preto             | 5.312   | 22   | 8   | 21   | 7   | 2   | 1  |
| BA | Belmonte                | 23.540  | 96   | 34  | 92   | 29  | 9   | 4  |
| BA | Belo Campo              | 17.013  | 70   | 24  | 67   | 21  | 7   | 3  |
| BA | Biritinga               | 15.989  | 65   | 23  | 63   | 20  | 6   | 3  |
| BA | Boa Nova                | 12.039  | 49   | 17  | 47   | 15  | 5   | 2  |
| BA | Boa Vista do Tupim      | 18.491  | 76   | 26  | 73   | 23  | 7   | 3  |
| BA | Bom Jesus da Lapa       | 70.151  | 285  | 99  | 274  | 86  | 26  | 10 |
| BA | Bom Jesus da Serra      | 9.768   | 40   | 14  | 39   | 12  | 4   | 2  |
| BA | Boninal                 | 14.518  | 59   | 21  | 57   | 18  | 6   | 2  |
| BA | Bonito                  | 16.999  | 69   | 24  | 67   | 21  | 7   | 3  |
| BA | Boquira                 | 21.486  | 88   | 31  | 84   | 27  | 8   | 3  |
| BA | Botuporã                | 10.050  | 41   | 15  | 40   | 13  | 4   | 2  |
| BA | Brejões                 | 14.155  | 58   | 20  | 56   | 18  | 6   | 2  |
| BA | Brejoândia              | 10.675  | 44   | 15  | 42   | 14  | 4   | 2  |
| BA | Brotas de Macaúbas      | 10.705  | 44   | 16  | 42   | 14  | 4   | 2  |
| BA | Brumado                 | 67.468  | 274  | 95  | 263  | 83  | 25  | 9  |
| BA | Buerarema               | 18.269  | 75   | 26  | 72   | 23  | 7   | 3  |
| BA | Buritirama              | 21.374  | 87   | 31  | 84   | 27  | 8   | 3  |
| BA | Caatiba                 | 6.232   | 26   | 9   | 25   | 8   | 3   | 1  |
| BA | Cabaceiras do Paraguaçu | 19.010  | 78   | 27  | 75   | 24  | 7   | 3  |
| BA | Cachoeira               | 33.659  | 137  | 48  | 132  | 42  | 13  | 5  |
| BA | Caculé                  | 23.407  | 95   | 33  | 92   | 29  | 9   | 4  |
| BA | Caém                    | 8.912   | 37   | 13  | 35   | 11  | 4   | 2  |
| BA | Caetanos                | 14.671  | 60   | 21  | 58   | 18  | 6   | 2  |
| BA | Caetité                 | 51.184  | 208  | 72  | 200  | 63  | 19  | 7  |
| BA | Cafarnaum               | 18.585  | 76   | 27  | 73   | 23  | 7   | 3  |
| BA | Cairu                   | 18.666  | 76   | 27  | 73   | 23  | 7   | 3  |
| BA | Caldeirão Grande        | 13.452  | 55   | 19  | 53   | 17  | 5   | 2  |
| BA | Camacan                 | 32.023  | 130  | 45  | 125  | 40  | 12  | 5  |
| BA | Camaçari                | 309.208 | 1255 | 435 | 1206 | 379 | 112 | 40 |
| BA | Camamu                  | 35.444  | 144  | 50  | 139  | 44  | 13  | 5  |
| BA | Campo Alegre de Lourdes | 28.839  | 117  | 41  | 113  | 36  | 11  | 4  |
| BA | Campo Formoso           | 71.754  | 292  | 101 | 280  | 88  | 26  | 10 |
| BA | Canápolis               | 9.694   | 40   | 14  | 38   | 12  | 4   | 2  |
| BA | Canarana                | 26.468  | 108  | 38  | 104  | 33  | 10  | 4  |
| BA | Canavieiras             | 30.722  | 125  | 44  | 120  | 38  | 12  | 4  |
| BA | Candeal                 | 8.109   | 33   | 12  | 32   | 10  | 3   | 2  |
| BA | Candeias                | 87.820  | 357  | 124 | 343  | 108 | 32  | 12 |
| BA | Candiba                 | 14.415  | 59   | 21  | 57   | 18  | 6   | 2  |
| BA | Cândido Sales           | 24.921  | 102  | 36  | 98   | 31  | 9   | 4  |
| BA | Cansanção               | 34.929  | 142  | 50  | 137  | 43  | 13  | 5  |
| BA | Canudos                 | 16.832  | 69   | 24  | 66   | 21  | 7   | 3  |
| BA | Capela do Alto Alegre   | 11.597  | 48   | 17  | 46   | 15  | 5   | 2  |
| BA | Capim Grosso            | 31.055  | 126  | 44  | 122  | 39  | 12  | 5  |

|    |                       |         |      |     |      |     |     |    |
|----|-----------------------|---------|------|-----|------|-----|-----|----|
| BA | Caraibas              | 8.659   | 36   | 13  | 34   | 11  | 4   | 2  |
| BA | Caravelas             | 22.166  | 90   | 32  | 87   | 28  | 8   | 3  |
| BA | Cardeal da Silva      | 9.395   | 39   | 14  | 37   | 12  | 4   | 2  |
| BA | Carinhanha            | 29.118  | 119  | 41  | 114  | 36  | 11  | 4  |
| BA | Casa Nova             | 73.092  | 297  | 103 | 285  | 90  | 27  | 10 |
| BA | Castro Alves          | 26.369  | 107  | 38  | 103  | 33  | 10  | 4  |
| BA | Catolândia            | 3.619   | 15   | 6   | 15   | 5   | 2   | 1  |
| BA | Catu                  | 55.222  | 224  | 78  | 216  | 68  | 20  | 8  |
| BA | Caturama              | 9.303   | 38   | 14  | 37   | 12  | 4   | 2  |
| BA | Central               | 17.293  | 71   | 25  | 68   | 22  | 7   | 3  |
| BA | Chorrochó             | 11.221  | 46   | 16  | 44   | 14  | 5   | 2  |
| BA | Cícero Dantas         | 32.636  | 133  | 46  | 128  | 40  | 12  | 5  |
| BA | Cipó                  | 17.402  | 71   | 25  | 68   | 22  | 7   | 3  |
| BA | Coaraci               | 16.128  | 66   | 23  | 63   | 20  | 6   | 3  |
| BA | Cocos                 | 18.835  | 77   | 27  | 74   | 24  | 7   | 3  |
| BA | Conceição da Feira    | 22.933  | 94   | 33  | 90   | 29  | 9   | 3  |
| BA | Conceição do Almeida  | 17.087  | 70   | 24  | 67   | 21  | 7   | 3  |
| BA | Conceição do Coité    | 67.394  | 274  | 95  | 263  | 83  | 25  | 9  |
| BA | Conceição do Jacuípe  | 33.631  | 137  | 48  | 132  | 42  | 13  | 5  |
| BA | Conde                 | 26.223  | 107  | 37  | 103  | 33  | 10  | 4  |
| BA | Condeúba              | 17.113  | 70   | 25  | 67   | 21  | 7   | 3  |
| BA | Contendas do Sincorá  | 4.025   | 17   | 6   | 16   | 5   | 2   | 1  |
| BA | Coração de Maria      | 22.391  | 91   | 32  | 88   | 28  | 9   | 3  |
| BA | Cordeiros             | 8.667   | 36   | 13  | 34   | 11  | 4   | 2  |
| BA | Coribe                | 14.108  | 58   | 20  | 55   | 18  | 6   | 2  |
| BA | Coronel João Sá       | 15.549  | 64   | 22  | 61   | 20  | 6   | 3  |
| BA | Correntina            | 32.243  | 131  | 46  | 126  | 40  | 12  | 5  |
| BA | Cotegipe              | 13.756  | 56   | 20  | 54   | 17  | 5   | 2  |
| BA | Cravolândia           | 5.352   | 22   | 8   | 21   | 7   | 2   | 1  |
| BA | Crisópolis            | 21.219  | 87   | 30  | 83   | 26  | 8   | 3  |
| BA | Cristópolis           | 13.981  | 57   | 20  | 55   | 18  | 6   | 2  |
| BA | Cruz das Almas        | 63.923  | 260  | 90  | 250  | 79  | 24  | 9  |
| BA | Curaçá                | 35.065  | 143  | 50  | 137  | 43  | 13  | 5  |
| BA | Dário Meira           | 10.347  | 42   | 15  | 41   | 13  | 4   | 2  |
| BA | Dias d'Ávila          | 83.705  | 340  | 118 | 327  | 103 | 31  | 11 |
| BA | Dom Basílio           | 12.281  | 50   | 18  | 48   | 16  | 5   | 2  |
| BA | Dom Macedo Costa      | 4.072   | 17   | 6   | 16   | 5   | 2   | 1  |
| BA | Elísio Medrado        | 8.129   | 33   | 12  | 32   | 10  | 3   | 2  |
| BA | Encruzilhada          | 15.914  | 65   | 23  | 63   | 20  | 6   | 3  |
| BA | Entre Rios            | 42.014  | 171  | 60  | 164  | 52  | 16  | 6  |
| BA | Esplanada             | 37.902  | 154  | 54  | 148  | 47  | 14  | 5  |
| BA | Euclides da Cunha     | 61.112  | 248  | 86  | 239  | 75  | 23  | 8  |
| BA | Eunápolis             | 115.360 | 468  | 163 | 450  | 142 | 42  | 15 |
| BA | Fátima                | 17.801  | 73   | 26  | 70   | 22  | 7   | 3  |
| BA | Feira da Mata         | 5.656   | 23   | 8   | 23   | 7   | 3   | 1  |
| BA | Feira de Santana      | 624.107 | 2532 | 877 | 2433 | 764 | 225 | 81 |
| BA | Filadélfia            | 16.314  | 67   | 23  | 64   | 20  | 6   | 3  |
| BA | Firmino Alves         | 5.641   | 23   | 8   | 22   | 7   | 3   | 1  |
| BA | Floresta Azul         | 10.525  | 43   | 15  | 42   | 13  | 4   | 2  |
| BA | Formosa do Rio Preto  | 26.111  | 106  | 37  | 102  | 32  | 10  | 4  |
| BA | Gandu                 | 32.778  | 133  | 47  | 128  | 41  | 12  | 5  |
| BA | Gavião                | 4.417   | 18   | 7   | 18   | 6   | 2   | 1  |
| BA | Gentio do Ouro        | 11.284  | 46   | 16  | 44   | 14  | 5   | 2  |
| BA | Glória                | 15.247  | 62   | 22  | 60   | 19  | 6   | 2  |
| BA | Gongogi               | 6.852   | 28   | 10  | 27   | 9   | 3   | 1  |
| BA | Governador Mangabeira | 20.800  | 85   | 30  | 82   | 26  | 8   | 3  |
| BA | Guajeru               | 6.371   | 26   | 9   | 25   | 8   | 3   | 1  |
| BA | Guanambi              | 85.353  | 347  | 120 | 333  | 105 | 31  | 12 |
| BA | Guaratinga            | 20.565  | 84   | 29  | 81   | 26  | 8   | 3  |
| BA | Heliópolis            | 12.946  | 53   | 19  | 51   | 16  | 5   | 2  |
| BA | Iaçú                  | 23.950  | 98   | 34  | 94   | 30  | 9   | 4  |
| BA | Ibiassucê             | 8.849   | 36   | 13  | 35   | 11  | 4   | 2  |
| BA | Ibicarai              | 21.083  | 86   | 30  | 83   | 26  | 8   | 3  |
| BA | Ibicoara              | 19.990  | 82   | 29  | 78   | 25  | 8   | 3  |
| BA | Ibicuí                | 16.262  | 66   | 23  | 64   | 20  | 6   | 3  |
| BA | Ibipeba               | 18.421  | 75   | 26  | 72   | 23  | 7   | 3  |

|    |                   |         |     |     |     |     |    |    |
|----|-------------------|---------|-----|-----|-----|-----|----|----|
| BA | Ibipitanga        | 14.989  | 61  | 22  | 59  | 19  | 6  | 2  |
| BA | Ibiquera          | 4.047   | 17  | 6   | 16  | 5   | 2  | 1  |
| BA | Ibirapitanga      | 23.433  | 96  | 33  | 92  | 29  | 9  | 4  |
| BA | Ibirapuã          | 8.740   | 36  | 13  | 35  | 11  | 4  | 2  |
| BA | Ibirataia         | 14.476  | 59  | 21  | 57  | 18  | 6  | 2  |
| BA | Ibitiara          | 16.463  | 67  | 24  | 65  | 21  | 6  | 3  |
| BA | Ibititá           | 17.048  | 70  | 24  | 67  | 21  | 7  | 3  |
| BA | Ibotirama         | 27.076  | 110 | 39  | 106 | 34  | 10 | 4  |
| BA | Ichu              | 6.232   | 26  | 9   | 25  | 8   | 3  | 1  |
| BA | Igaporã           | 15.661  | 64  | 22  | 62  | 20  | 6  | 3  |
| BA | Igrapiúna         | 12.963  | 53  | 19  | 51  | 16  | 5  | 2  |
| BA | Iguai             | 27.006  | 110 | 38  | 106 | 34  | 10 | 4  |
| BA | Ilhéus            | 157.639 | 640 | 222 | 615 | 193 | 57 | 21 |
| BA | Inhambupe         | 40.720  | 166 | 58  | 159 | 50  | 15 | 6  |
| BA | Ipecaetá          | 14.229  | 58  | 20  | 56  | 18  | 6  | 2  |
| BA | Ipiaú             | 45.969  | 187 | 65  | 180 | 57  | 17 | 6  |
| BA | Ipirá             | 59.281  | 241 | 84  | 232 | 73  | 22 | 8  |
| BA | Ipupiara          | 9.954   | 41  | 14  | 39  | 13  | 4  | 2  |
| BA | Irajuba           | 7.295   | 30  | 11  | 29  | 9   | 3  | 1  |
| BA | Iramaia           | 7.874   | 32  | 12  | 31  | 10  | 3  | 2  |
| BA | Iraquara          | 25.728  | 105 | 37  | 101 | 32  | 10 | 4  |
| BA | Irará             | 29.305  | 119 | 42  | 115 | 36  | 11 | 4  |
| BA | Irecê             | 74.050  | 301 | 104 | 289 | 91  | 27 | 10 |
| BA | Itabela           | 30.901  | 126 | 44  | 121 | 38  | 12 | 4  |
| BA | Itaberaba         | 64.795  | 263 | 92  | 253 | 80  | 24 | 9  |
| BA | Itabuna           | 214.123 | 869 | 301 | 835 | 263 | 78 | 28 |
| BA | Itacaré           | 29.051  | 118 | 41  | 114 | 36  | 11 | 4  |
| BA | Itaeté            | 16.164  | 66  | 23  | 63  | 20  | 6  | 3  |
| BA | Itagi             | 12.140  | 50  | 18  | 48  | 15  | 5  | 2  |
| BA | Itagibá           | 14.331  | 59  | 21  | 56  | 18  | 6  | 2  |
| BA | Itagimirim        | 6.784   | 28  | 10  | 27  | 9   | 3  | 1  |
| BA | Itaguaçu da Bahia | 14.650  | 60  | 21  | 58  | 18  | 6  | 2  |
| BA | Itaju do Colônia  | 6.515   | 27  | 10  | 26  | 8   | 3  | 1  |
| BA | Itajuípe          | 20.309  | 83  | 29  | 80  | 25  | 8  | 3  |
| BA | Itamaraju         | 64.423  | 262 | 91  | 252 | 79  | 24 | 9  |
| BA | Itamarí           | 7.971   | 33  | 12  | 32  | 10  | 3  | 2  |
| BA | Itambé            | 22.474  | 92  | 32  | 88  | 28  | 9  | 3  |
| BA | Itanagra          | 6.433   | 27  | 10  | 26  | 8   | 3  | 1  |
| BA | Itanhém           | 19.231  | 79  | 28  | 75  | 24  | 7  | 3  |
| BA | Itaparica         | 22.440  | 92  | 32  | 88  | 28  | 9  | 3  |
| BA | Itapé             | 8.300   | 34  | 12  | 33  | 11  | 3  | 2  |
| BA | Itapebi           | 10.173  | 42  | 15  | 40  | 13  | 4  | 2  |
| BA | Itapetinga        | 77.408  | 314 | 109 | 302 | 95  | 28 | 11 |
| BA | Itapicuru         | 36.173  | 147 | 51  | 141 | 45  | 14 | 5  |
| BA | Itapitanga        | 10.284  | 42  | 15  | 41  | 13  | 4  | 2  |
| BA | Itaquara          | 8.375   | 34  | 12  | 33  | 11  | 4  | 2  |
| BA | Itarantim         | 19.937  | 81  | 29  | 78  | 25  | 8  | 3  |
| BA | Itatim            | 14.588  | 60  | 21  | 57  | 18  | 6  | 2  |
| BA | Itiruçu           | 12.482  | 51  | 18  | 49  | 16  | 5  | 2  |
| BA | Itiúba            | 36.140  | 147 | 51  | 141 | 45  | 14 | 5  |
| BA | Itororó           | 20.394  | 83  | 29  | 80  | 25  | 8  | 3  |
| BA | Ituaçu            | 19.095  | 78  | 27  | 75  | 24  | 7  | 3  |
| BA | Ituberá           | 28.870  | 118 | 41  | 113 | 36  | 11 | 4  |
| BA | Iuiu              | 11.038  | 45  | 16  | 44  | 14  | 4  | 2  |
| BA | Jaborandi         | 8.176   | 34  | 12  | 32  | 11  | 3  | 2  |
| BA | Jacaraci          | 14.855  | 61  | 21  | 58  | 19  | 6  | 2  |
| BA | Jacobina          | 80.749  | 328 | 114 | 315 | 99  | 30 | 11 |
| BA | Jaguaquara        | 54.913  | 223 | 78  | 215 | 68  | 20 | 8  |
| BA | Jaguarari         | 33.915  | 138 | 48  | 133 | 42  | 13 | 5  |
| BA | Jaguaripe         | 19.162  | 78  | 27  | 75  | 24  | 7  | 3  |
| BA | Jandaíra          | 10.742  | 44  | 16  | 42  | 14  | 4  | 2  |
| BA | Jequié            | 156.277 | 634 | 220 | 610 | 192 | 57 | 21 |
| BA | Jeremoabo         | 40.832  | 166 | 58  | 160 | 50  | 15 | 6  |
| BA | Jiquiriçá         | 14.576  | 60  | 21  | 57  | 18  | 6  | 2  |
| BA | Jitaúna           | 10.470  | 43  | 15  | 41  | 13  | 4  | 2  |
| BA | João Dourado      | 25.606  | 104 | 36  | 100 | 32  | 10 | 4  |

|    |                             |         |     |     |     |     |    |    |
|----|-----------------------------|---------|-----|-----|-----|-----|----|----|
| BA | Juazeiro                    | 219.544 | 891 | 309 | 856 | 269 | 80 | 29 |
| BA | Jucuruçu                    | 8.856   | 36  | 13  | 35  | 11  | 4  | 2  |
| BA | Jussara                     | 15.241  | 62  | 22  | 60  | 19  | 6  | 2  |
| BA | Jussari                     | 5.706   | 24  | 9   | 23  | 7   | 3  | 1  |
| BA | Jussiapé                    | 5.777   | 24  | 9   | 23  | 8   | 3  | 1  |
| BA | Lafaiete Coutinho           | 3.663   | 15  | 6   | 15  | 5   | 2  | 1  |
| BA | Lagoa Real                  | 15.870  | 65  | 23  | 62  | 20  | 6  | 3  |
| BA | Laje                        | 24.214  | 99  | 35  | 95  | 30  | 9  | 4  |
| BA | Lajedão                     | 3.993   | 17  | 6   | 16  | 5   | 2  | 1  |
| BA | Lajedinho                   | 3.735   | 16  | 6   | 15  | 5   | 2  | 1  |
| BA | Lajedo do Tabocal           | 8.591   | 35  | 13  | 34  | 11  | 4  | 2  |
| BA | Lamarão                     | 8.078   | 33  | 12  | 32  | 10  | 3  | 2  |
| BA | Lapão                       | 27.323  | 111 | 39  | 107 | 34  | 10 | 4  |
| BA | Lauro de Freitas            | 204.669 | 831 | 288 | 798 | 251 | 74 | 27 |
| BA | Lençóis                     | 11.586  | 47  | 17  | 46  | 15  | 5  | 2  |
| BA | Licínio de Almeida          | 12.357  | 51  | 18  | 49  | 16  | 5  | 2  |
| BA | Livramento de Nossa Senhora | 46.372  | 189 | 66  | 181 | 57  | 17 | 6  |
| BA | Luis Eduardo Magalhães      | 92.671  | 376 | 131 | 362 | 114 | 34 | 12 |
| BA | Macajuba                    | 11.318  | 46  | 16  | 45  | 14  | 5  | 2  |
| BA | Macarani                    | 19.056  | 78  | 27  | 75  | 24  | 7  | 3  |
| BA | Macaúbas                    | 50.481  | 205 | 71  | 197 | 62  | 19 | 7  |
| BA | Macururé                    | 7.752   | 32  | 11  | 31  | 10  | 3  | 2  |
| BA | Madre de Deus               | 21.754  | 89  | 31  | 85  | 27  | 8  | 3  |
| BA | Maetinga                    | 2.386   | 10  | 4   | 10  | 3   | 1  | 1  |
| BA | Maiquinique                 | 10.294  | 42  | 15  | 41  | 13  | 4  | 2  |
| BA | Mairí                       | 18.535  | 76  | 27  | 73  | 23  | 7  | 3  |
| BA | Malhada                     | 16.875  | 69  | 24  | 66  | 21  | 7  | 3  |
| BA | Malhada de Pedras           | 8.326   | 34  | 12  | 33  | 11  | 4  | 2  |
| BA | Manoel Vitorino             | 12.944  | 53  | 19  | 51  | 16  | 5  | 2  |
| BA | Mansidão                    | 13.822  | 57  | 20  | 54  | 17  | 5  | 2  |
| BA | Maracás                     | 19.973  | 82  | 29  | 78  | 25  | 8  | 3  |
| BA | Maragogipe                  | 44.902  | 183 | 64  | 175 | 55  | 17 | 6  |
| BA | Marauá                      | 20.664  | 84  | 30  | 81  | 26  | 8  | 3  |
| BA | Marcionílio Souza           | 10.357  | 43  | 15  | 41  | 13  | 4  | 2  |
| BA | Mascote                     | 13.619  | 56  | 20  | 54  | 17  | 5  | 2  |
| BA | Mata de São João            | 47.643  | 194 | 67  | 186 | 59  | 18 | 7  |
| BA | Matina                      | 12.359  | 51  | 18  | 49  | 16  | 5  | 2  |
| BA | Medeiros Neto               | 22.741  | 93  | 32  | 89  | 28  | 9  | 3  |
| BA | Miguel Calmon               | 25.771  | 105 | 37  | 101 | 32  | 10 | 4  |
| BA | Milagres                    | 10.838  | 44  | 16  | 43  | 14  | 4  | 2  |
| BA | Mirangaba                   | 18.603  | 76  | 27  | 73  | 23  | 7  | 3  |
| BA | Mirante                     | 8.264   | 34  | 12  | 33  | 11  | 3  | 2  |
| BA | Monte Santo                 | 49.145  | 200 | 70  | 192 | 61  | 18 | 7  |
| BA | Morpará                     | 8.476   | 35  | 12  | 34  | 11  | 4  | 2  |
| BA | Morro do Chapéu             | 35.466  | 144 | 50  | 139 | 44  | 13 | 5  |
| BA | Mortugaba                   | 12.063  | 49  | 17  | 48  | 15  | 5  | 2  |
| BA | Mucugê                      | 8.725   | 36  | 13  | 35  | 11  | 4  | 2  |
| BA | Mucuri                      | 42.729  | 174 | 61  | 167 | 53  | 16 | 6  |
| BA | Mulungu do Morro            | 10.469  | 43  | 15  | 41  | 13  | 4  | 2  |
| BA | Mundo Novo                  | 27.153  | 111 | 39  | 106 | 34  | 10 | 4  |
| BA | Muniz Ferreira              | 7.464   | 31  | 11  | 30  | 10  | 3  | 1  |
| BA | Muquém do São Francisco     | 11.479  | 47  | 17  | 45  | 15  | 5  | 2  |
| BA | Muritiba                    | 29.420  | 120 | 42  | 115 | 37  | 11 | 4  |
| BA | Mutuípe                     | 22.340  | 91  | 32  | 88  | 28  | 9  | 3  |
| BA | Nazaré                      | 28.661  | 117 | 41  | 112 | 36  | 11 | 4  |
| BA | Nilo Peçanha                | 14.156  | 58  | 20  | 56  | 18  | 6  | 2  |
| BA | Nordestina                  | 13.197  | 54  | 19  | 52  | 17  | 5  | 2  |
| BA | Nova Canaã                  | 16.482  | 67  | 24  | 65  | 21  | 6  | 3  |
| BA | Nova Fátima                 | 7.830   | 32  | 11  | 31  | 10  | 3  | 2  |
| BA | Nova Ibiá                   | 6.518   | 27  | 10  | 26  | 8   | 3  | 1  |
| BA | Nova Itarana                | 8.328   | 34  | 12  | 33  | 11  | 4  | 2  |
| BA | Nova Redenção               | 9.126   | 38  | 13  | 36  | 12  | 4  | 2  |
| BA | Nova Soure                  | 27.047  | 110 | 38  | 106 | 34  | 10 | 4  |
| BA | Nova Viçosa                 | 44.170  | 180 | 63  | 173 | 55  | 16 | 6  |
| BA | Novo Horizonte              | 12.653  | 52  | 18  | 50  | 16  | 5  | 2  |
| BA | Novo Triunfo                | 15.445  | 63  | 22  | 61  | 19  | 6  | 2  |



|    |                           |           |       |      |       |      |      |     |
|----|---------------------------|-----------|-------|------|-------|------|------|-----|
| BA | Olindina                  | 28.373    | 116   | 40   | 111   | 35   | 11   | 4   |
| BA | Oliveira dos Brejinhos    | 21.797    | 89    | 31   | 85    | 27   | 8    | 3   |
| BA | Ouriçangas                | 8.575     | 35    | 13   | 34    | 11   | 4    | 2   |
| BA | Ourolândia                | 17.567    | 72    | 25   | 69    | 22   | 7    | 3   |
| BA | Palmas de Monte Alto      | 21.840    | 89    | 31   | 86    | 27   | 8    | 3   |
| BA | Palmeiras                 | 9.123     | 38    | 13   | 36    | 12   | 4    | 2   |
| BA | Paramirim                 | 21.777    | 89    | 31   | 85    | 27   | 8    | 3   |
| BA | Paratinga                 | 32.274    | 131   | 46   | 126   | 40   | 12   | 5   |
| BA | Paripiranga               | 29.124    | 119   | 41   | 114   | 36   | 11   | 4   |
| BA | Pau Brasil                | 9.550     | 39    | 14   | 38    | 12   | 4    | 2   |
| BA | Paulo Afonso              | 119.213   | 484   | 168  | 465   | 146  | 43   | 16  |
| BA | Pé de Serra               | 13.535    | 55    | 20   | 53    | 17   | 5    | 2   |
| BA | Pedrao                    | 7.438     | 31    | 11   | 29    | 10   | 3    | 1   |
| BA | Pedro Alexandre           | 16.698    | 68    | 24   | 66    | 21   | 7    | 3   |
| BA | Piatã                     | 16.854    | 69    | 24   | 66    | 21   | 7    | 3   |
| BA | Pilão Arcado              | 35.295    | 144   | 50   | 138   | 44   | 13   | 5   |
| BA | Pindaí                    | 16.308    | 67    | 23   | 64    | 20   | 6    | 3   |
| BA | Pindobaçu                 | 20.048    | 82    | 29   | 79    | 25   | 8    | 3   |
| BA | Pintadas                  | 10.353    | 42    | 15   | 41    | 13   | 4    | 2   |
| BA | Pirai do Norte            | 10.050    | 41    | 15   | 40    | 13   | 4    | 2   |
| BA | Piripá                    | 10.253    | 42    | 15   | 40    | 13   | 4    | 2   |
| BA | Piritiba                  | 25.162    | 103   | 36   | 99    | 31   | 10   | 4   |
| BA | Planaltino                | 9.415     | 39    | 14   | 37    | 12   | 4    | 2   |
| BA | Planalto                  | 26.581    | 108   | 38   | 104   | 33   | 10   | 4   |
| BA | Poções                    | 46.885    | 191   | 66   | 183   | 58   | 17   | 7   |
| BA | Pojuca                    | 40.401    | 164   | 57   | 158   | 50   | 15   | 6   |
| BA | Ponto Novo                | 14.729    | 60    | 21   | 58    | 19   | 6    | 2   |
| BA | Porto Seguro              | 152.529   | 619   | 215  | 595   | 187  | 55   | 20  |
| BA | Potiraguá                 | 6.623     | 27    | 10   | 26    | 9    | 3    | 1   |
| BA | Prado                     | 28.214    | 115   | 40   | 110   | 35   | 11   | 4   |
| BA | Presidente Dutra          | 15.180    | 62    | 22   | 60    | 19   | 6    | 2   |
| BA | Presidente Jânio Quadros  | 12.028    | 49    | 17   | 47    | 15   | 5    | 2   |
| BA | Presidente Tancredo Neves | 28.272    | 115   | 40   | 111   | 35   | 11   | 4   |
| BA | Queimadas                 | 25.428    | 104   | 36   | 100   | 32   | 10   | 4   |
| BA | Quijingue                 | 27.672    | 113   | 39   | 108   | 34   | 10   | 4   |
| BA | Quixabeira                | 8.939     | 37    | 13   | 35    | 11   | 4    | 2   |
| BA | Rafael Jambeiro           | 22.643    | 92    | 32   | 89    | 28   | 9    | 3   |
| BA | Remanso                   | 41.324    | 168   | 59   | 162   | 51   | 15   | 6   |
| BA | Retirolândia              | 14.588    | 60    | 21   | 57    | 18   | 6    | 2   |
| BA | Riachão das Neves         | 22.330    | 91    | 32   | 88    | 28   | 9    | 3   |
| BA | Riachão do Jacuípe        | 33.498    | 136   | 48   | 131   | 41   | 13   | 5   |
| BA | Riacho de Santana         | 35.757    | 146   | 51   | 140   | 44   | 13   | 5   |
| BA | Ribeira do Amparo         | 14.631    | 60    | 21   | 58    | 18   | 6    | 2   |
| BA | Ribeira do Pombal         | 54.097    | 220   | 76   | 211   | 67   | 20   | 7   |
| BA | Ribeirão do Largo         | 4.896     | 20    | 7    | 20    | 6    | 2    | 1   |
| BA | Rio de Contas             | 12.878    | 53    | 19   | 51    | 16   | 5    | 2   |
| BA | Rio do Antônio            | 15.521    | 63    | 22   | 61    | 19   | 6    | 3   |
| BA | Rio do Pires              | 11.672    | 48    | 17   | 46    | 15   | 5    | 2   |
| BA | Rio Real                  | 41.209    | 168   | 58   | 161   | 51   | 15   | 6   |
| BA | Rodelas                   | 9.548     | 39    | 14   | 38    | 12   | 4    | 2   |
| BA | Ruy Barbosa               | 30.900    | 126   | 44   | 121   | 38   | 12   | 4   |
| BA | Salinas da Margarida      | 16.047    | 66    | 23   | 63    | 20   | 6    | 3   |
| BA | Salvador                  | 2.900.319 | 11765 | 4074 | 11303 | 3550 | 1046 | 376 |
| BA | Santa Bárbara             | 20.971    | 86    | 30   | 82    | 26   | 8    | 3   |
| BA | Santa Brígida             | 13.917    | 57    | 20   | 55    | 18   | 6    | 2   |
| BA | Santa Cruz Cabralia       | 28.058    | 114   | 40   | 110   | 35   | 11   | 4   |
| BA | Santa Cruz da Vitória     | 6.241     | 26    | 9    | 25    | 8    | 3    | 1   |
| BA | Santa Inês                | 10.583    | 43    | 15   | 42    | 13   | 4    | 2   |
| BA | Santaluz                  | 37.704    | 153   | 53   | 147   | 47   | 14   | 5   |
| BA | Santa Luzia               | 12.308    | 50    | 18   | 48    | 16   | 5    | 2   |
| BA | Santa Maria da Vitória    | 39.707    | 162   | 56   | 155   | 49   | 15   | 6   |
| BA | Santana                   | 26.792    | 109   | 38   | 105   | 33   | 10   | 4   |
| BA | Santanópolis              | 8.987     | 37    | 13   | 36    | 11   | 4    | 2   |
| BA | Santa Rita de Cássia      | 28.613    | 117   | 41   | 112   | 36   | 11   | 4   |
| BA | Santa Terezinha           | 10.520    | 43    | 15   | 41    | 13   | 4    | 2   |
| BA | Santo Amaro               | 60.190    | 245   | 85   | 235   | 74   | 22   | 8   |

|    |                        |         |      |     |      |     |     |    |
|----|------------------------|---------|------|-----|------|-----|-----|----|
| BA | Santo Antônio de Jesus | 103.204 | 419  | 145 | 403  | 127 | 38  | 14 |
| BA | Santo Estêvão          | 53.666  | 218  | 76  | 210  | 66  | 20  | 7  |
| BA | São Desidério          | 34.764  | 142  | 49  | 136  | 43  | 13  | 5  |
| BA | São Domingos           | 9.085   | 37   | 13  | 36   | 12  | 4   | 2  |
| BA | São Félix              | 14.784  | 60   | 21  | 58   | 19  | 6   | 2  |
| BA | São Félix do Coribe    | 15.543  | 64   | 22  | 61   | 20  | 6   | 3  |
| BA | São Felipe             | 21.083  | 86   | 30  | 83   | 26  | 8   | 3  |
| BA | São Francisco do Conde | 40.664  | 165  | 58  | 159  | 50  | 15  | 6  |
| BA | São Gabriel            | 18.785  | 77   | 27  | 74   | 23  | 7   | 3  |
| BA | São Gonçalo dos Campos | 38.315  | 156  | 54  | 150  | 47  | 14  | 5  |
| BA | São José da Vitória    | 5.562   | 23   | 8   | 22   | 7   | 3   | 1  |
| BA | São José do Jacuípe    | 10.546  | 43   | 15  | 42   | 13  | 4   | 2  |
| BA | São Miguel das Matas   | 11.733  | 48   | 17  | 46   | 15  | 5   | 2  |
| BA | São Sebastião do Passé | 44.554  | 181  | 63  | 174  | 55  | 17  | 6  |
| BA | Sapeaçu                | 17.421  | 71   | 25  | 68   | 22  | 7   | 3  |
| BA | Sátiro Dias            | 17.330  | 71   | 25  | 68   | 22  | 7   | 3  |
| BA | Saubara                | 12.163  | 50   | 18  | 48   | 15  | 5   | 2  |
| BA | Saúde                  | 12.971  | 53   | 19  | 51   | 16  | 5   | 2  |
| BA | Seabra                 | 44.370  | 180  | 63  | 173  | 55  | 16  | 6  |
| BA | Sebastião Laranjeiras  | 11.586  | 47   | 17  | 46   | 15  | 5   | 2  |
| BA | Senhor do Bonfim       | 79.813  | 324  | 113 | 312  | 98  | 29  | 11 |
| BA | Serra do Ramalho       | 31.362  | 128  | 45  | 123  | 39  | 12  | 5  |
| BA | Sento Sé               | 41.279  | 168  | 58  | 161  | 51  | 15  | 6  |
| BA | Serra Dourada          | 17.261  | 71   | 25  | 68   | 22  | 7   | 3  |
| BA | Serra Preta            | 14.531  | 59   | 21  | 57   | 18  | 6   | 2  |
| BA | Serrinha               | 81.693  | 332  | 115 | 319  | 100 | 30  | 11 |
| BA | Serrolândia            | 13.490  | 55   | 19  | 53   | 17  | 5   | 2  |
| BA | Simões Filho           | 137.117 | 557  | 193 | 535  | 168 | 50  | 18 |
| BA | Sítio do Mato          | 13.104  | 54   | 19  | 52   | 17  | 5   | 2  |
| BA | Sítio do Quinto        | 9.431   | 39   | 14  | 37   | 12  | 4   | 2  |
| BA | Sobradinho             | 23.274  | 95   | 33  | 91   | 29  | 9   | 4  |
| BA | Souto Soares           | 17.118  | 70   | 25  | 67   | 21  | 7   | 3  |
| BA | Tabocas do Brejo Velho | 12.515  | 51   | 18  | 49   | 16  | 5   | 2  |
| BA | Tanhaçu                | 20.383  | 83   | 29  | 80   | 25  | 8   | 3  |
| BA | Tanque Novo            | 17.518  | 72   | 25  | 69   | 22  | 7   | 3  |
| BA | Tanquinho              | 7.936   | 33   | 12  | 31   | 10  | 3   | 2  |
| BA | Taperoá                | 21.421  | 87   | 31  | 84   | 27  | 8   | 3  |
| BA | Tapiramutá             | 16.939  | 69   | 24  | 67   | 21  | 7   | 3  |
| BA | Teixeira de Freitas    | 164.290 | 667  | 231 | 641  | 202 | 60  | 22 |
| BA | Teodoro Sampaio        | 7.296   | 30   | 11  | 29   | 9   | 3   | 1  |
| BA | Teofilândia            | 22.590  | 92   | 32  | 89   | 28  | 9   | 3  |
| BA | Teolândia              | 15.097  | 62   | 22  | 59   | 19  | 6   | 2  |
| BA | Terra Nova             | 13.018  | 53   | 19  | 51   | 16  | 5   | 2  |
| BA | Tremedal               | 15.996  | 65   | 23  | 63   | 20  | 6   | 3  |
| BA | Tucano                 | 50.903  | 207  | 72  | 199  | 63  | 19  | 7  |
| BA | Uauá                   | 23.991  | 98   | 34  | 94   | 30  | 9   | 4  |
| BA | Ubaira                 | 19.860  | 81   | 28  | 78   | 25  | 8   | 3  |
| BA | Ubatuba                | 18.647  | 76   | 27  | 73   | 23  | 7   | 3  |
| BA | Ubatã                  | 27.481  | 112  | 39  | 108  | 34  | 10  | 4  |
| BA | Uibaí                  | 13.894  | 57   | 20  | 55   | 18  | 6   | 2  |
| BA | Umburanas              | 19.573  | 80   | 28  | 77   | 24  | 8   | 3  |
| BA | Una                    | 18.108  | 74   | 26  | 71   | 23  | 7   | 3  |
| BA | Urandi                 | 16.672  | 68   | 24  | 65   | 21  | 7   | 3  |
| BA | Uruçuca                | 20.312  | 83   | 29  | 80   | 25  | 8   | 3  |
| BA | Utinga                 | 19.330  | 79   | 28  | 76   | 24  | 7   | 3  |
| BA | Valença                | 97.873  | 398  | 138 | 382  | 120 | 36  | 13 |
| BA | Valente                | 29.111  | 119  | 41  | 114  | 36  | 11  | 4  |
| BA | Várzea da Roça         | 14.135  | 58   | 20  | 56   | 18  | 6   | 2  |
| BA | Várzea do Poço         | 9.247   | 38   | 13  | 37   | 12  | 4   | 2  |
| BA | Várzea Nova            | 12.556  | 51   | 18  | 49   | 16  | 5   | 2  |
| BA | Varzedo                | 8.734   | 36   | 13  | 35   | 11  | 4   | 2  |
| BA | Vera Cruz              | 44.185  | 180  | 63  | 173  | 55  | 16  | 6  |
| BA | Vereda                 | 6.105   | 25   | 9   | 24   | 8   | 3   | 1  |
| BA | Vitória da Conquista   | 343.643 | 1394 | 483 | 1340 | 421 | 124 | 45 |
| BA | Wagner                 | 9.342   | 38   | 14  | 37   | 12  | 4   | 2  |
| BA | Wanderley              | 12.125  | 50   | 18  | 48   | 15  | 5   | 2  |

|    |                        |         |     |     |     |     |    |    |
|----|------------------------|---------|-----|-----|-----|-----|----|----|
| BA | Wenceslau Guimarães    | 20.862  | 85  | 30  | 82  | 26  | 8  | 3  |
| BA | Xique-Xique            | 46.562  | 189 | 66  | 182 | 57  | 17 | 7  |
| MG | Abadia dos Dourados    | 7.022   | 30  | 11  | 29  | 10  | 3  | 1  |
| MG | Abaeté                 | 23.263  | 99  | 35  | 96  | 30  | 9  | 4  |
| MG | Abre Campo             | 13.434  | 58  | 20  | 55  | 18  | 6  | 2  |
| MG | Acaiaca                | 3.995   | 17  | 6   | 17  | 6   | 2  | 1  |
| MG | Açucena                | 9.270   | 40  | 14  | 38  | 12  | 4  | 2  |
| MG | Água Boa               | 13.319  | 57  | 20  | 55  | 18  | 6  | 2  |
| MG | Água Comprida          | 1.986   | 9   | 3   | 9   | 3   | 1  | 1  |
| MG | Aguanil                | 4.557   | 20  | 7   | 19  | 6   | 2  | 1  |
| MG | Águas Formosas         | 19.285  | 82  | 29  | 79  | 25  | 8  | 3  |
| MG | Águas Vermelhas        | 13.656  | 59  | 21  | 56  | 18  | 6  | 2  |
| MG | Aimorés                | 25.116  | 107 | 37  | 103 | 33  | 10 | 4  |
| MG | Aiuruoca               | 5.949   | 26  | 9   | 25  | 8   | 3  | 1  |
| MG | Alagoa                 | 2.657   | 12  | 4   | 11  | 4   | 2  | 1  |
| MG | Albertina              | 3.015   | 13  | 5   | 13  | 4   | 2  | 1  |
| MG | Além Paraíba           | 35.438  | 151 | 53  | 145 | 46  | 14 | 5  |
| MG | Alfenas                | 80.973  | 345 | 120 | 331 | 104 | 31 | 11 |
| MG | Alfredo Vasconcelos    | 7.052   | 30  | 11  | 29  | 10  | 3  | 1  |
| MG | Almenara               | 42.380  | 181 | 63  | 174 | 55  | 17 | 6  |
| MG | Alpercata              | 7.448   | 32  | 11  | 31  | 10  | 3  | 2  |
| MG | Alpinópolis            | 20.059  | 86  | 30  | 82  | 26  | 8  | 3  |
| MG | Alterosa               | 14.566  | 62  | 22  | 60  | 19  | 6  | 2  |
| MG | Alto Caparaó           | 5.938   | 26  | 9   | 25  | 8   | 3  | 1  |
| MG | Alto Rio Doce          | 10.723  | 46  | 16  | 44  | 14  | 5  | 2  |
| MG | Alvarenga              | 3.783   | 17  | 6   | 16  | 5   | 2  | 1  |
| MG | Alvinópolis            | 15.135  | 65  | 23  | 62  | 20  | 6  | 3  |
| MG | Alvorada de Minas      | 3.605   | 16  | 6   | 15  | 5   | 2  | 1  |
| MG | Amparo do Serra        | 4.643   | 20  | 7   | 19  | 6   | 2  | 1  |
| MG | Andradas               | 41.704  | 178 | 62  | 171 | 54  | 16 | 6  |
| MG | Cachoeira de Pajeú     | 9.470   | 41  | 14  | 39  | 13  | 4  | 2  |
| MG | Andrelândia            | 12.189  | 52  | 18  | 50  | 16  | 5  | 2  |
| MG | Angelândia             | 8.594   | 37  | 13  | 36  | 12  | 4  | 2  |
| MG | Antônio Carlos         | 11.471  | 49  | 17  | 47  | 15  | 5  | 2  |
| MG | Antônio Dias           | 9.233   | 40  | 14  | 38  | 12  | 4  | 2  |
| MG | Antônio Prado de Minas | 1.577   | 7   | 3   | 7   | 3   | 1  | 1  |
| MG | Araçai                 | 2.360   | 11  | 4   | 10  | 4   | 1  | 1  |
| MG | Aracitaba              | 2.056   | 9   | 4   | 9   | 3   | 1  | 1  |
| MG | Araçuaí                | 36.715  | 157 | 55  | 150 | 48  | 14 | 5  |
| MG | Araguari               | 118.361 | 504 | 175 | 484 | 152 | 45 | 17 |
| MG | Arantina               | 2.779   | 12  | 5   | 12  | 4   | 2  | 1  |
| MG | Araponga               | 8.467   | 36  | 13  | 35  | 11  | 4  | 2  |
| MG | Araporã                | 6.992   | 30  | 11  | 29  | 9   | 3  | 1  |
| MG | Arapuá                 | 2.836   | 13  | 5   | 12  | 4   | 2  | 1  |
| MG | Araújos                | 9.523   | 41  | 15  | 39  | 13  | 4  | 2  |
| MG | Araxá                  | 108.403 | 461 | 160 | 443 | 140 | 41 | 15 |
| MG | Arceburgo              | 10.990  | 47  | 17  | 45  | 15  | 5  | 2  |
| MG | Arcos                  | 40.658  | 173 | 60  | 167 | 53  | 16 | 6  |
| MG | Areado                 | 15.288  | 65  | 23  | 63  | 20  | 6  | 3  |
| MG | Argirita               | 2.681   | 12  | 4   | 11  | 4   | 2  | 1  |
| MG | Aricanduva             | 5.305   | 23  | 8   | 22  | 7   | 3  | 1  |
| MG | Arinos                 | 17.850  | 76  | 27  | 73  | 23  | 7  | 3  |
| MG | Astolfo Dutra          | 14.358  | 62  | 22  | 59  | 19  | 6  | 2  |
| MG | Ataléia                | 12.496  | 54  | 19  | 52  | 17  | 5  | 2  |
| MG | Augusto de Lima        | 4.833   | 21  | 8   | 20  | 7   | 2  | 1  |
| MG | Baependi               | 19.249  | 82  | 29  | 79  | 25  | 8  | 3  |
| MG | Baldim                 | 7.780   | 34  | 12  | 32  | 10  | 3  | 2  |
| MG | Bambuí                 | 23.964  | 102 | 36  | 98  | 31  | 10 | 4  |
| MG | Bandeira               | 4.738   | 21  | 7   | 20  | 7   | 2  | 1  |
| MG | Bandeira do Sul        | 5.808   | 25  | 9   | 24  | 8   | 3  | 1  |
| MG | Barão de Cocais        | 33.232  | 142 | 49  | 136 | 43  | 13 | 5  |
| MG | Barão de Monte Alto    | 5.311   | 23  | 8   | 22  | 7   | 3  | 1  |
| MG | Barbacena              | 139.061 | 592 | 205 | 568 | 179 | 53 | 19 |
| MG | Barra Longa            | 4.905   | 21  | 8   | 21  | 7   | 2  | 1  |
| MG | Barroso                | 20.981  | 90  | 31  | 86  | 27  | 8  | 3  |
| MG | Bela Vista de Minas    | 10.269  | 44  | 16  | 42  | 14  | 4  | 2  |

|    |                       |           |       |      |       |      |     |     |
|----|-----------------------|-----------|-------|------|-------|------|-----|-----|
| MG | Belmiro Braga         | 3.422     | 15    | 6    | 14    | 5    | 2   | 1   |
| MG | Belo Horizonte        | 2.530.701 | 10759 | 3725 | 10337 | 3246 | 956 | 344 |
| MG | Belo Oriente          | 27.277    | 116   | 41   | 112   | 35   | 11  | 4   |
| MG | Belo Vale             | 7.723     | 33    | 12   | 32    | 10   | 3   | 2   |
| MG | Berilo                | 11.813    | 51    | 18   | 49    | 16   | 5   | 2   |
| MG | Bertópolis            | 4.609     | 20    | 7    | 19    | 6    | 2   | 1   |
| MG | Berizal               | 4.792     | 21    | 8    | 20    | 7    | 2   | 1   |
| MG | Betim                 | 450.024   | 1914  | 663  | 1839  | 578  | 170 | 62  |
| MG | Bias Fortes           | 3.282     | 14    | 5    | 14    | 5    | 2   | 1   |
| MG | Bicas                 | 14.612    | 63    | 22   | 60    | 19   | 6   | 2   |
| MG | Biquinhas             | 2.482     | 11    | 4    | 11    | 4    | 1   | 1   |
| MG | Boa Esperança         | 40.308    | 172   | 60   | 165   | 52   | 16  | 6   |
| MG | Bocaina de Minas      | 5.088     | 22    | 8    | 21    | 7    | 2   | 1   |
| MG | Bocaiúva              | 50.521    | 215   | 75   | 207   | 65   | 20  | 7   |
| MG | Bom Despacho          | 51.436    | 219   | 76   | 211   | 66   | 20  | 7   |
| MG | Bom Jardim de Minas   | 6.444     | 28    | 10   | 27    | 9    | 3   | 1   |
| MG | Bom Jesus da Penha    | 4.270     | 19    | 7    | 18    | 6    | 2   | 1   |
| MG | Bom Jesus do Amparo   | 6.182     | 27    | 10   | 26    | 8    | 3   | 1   |
| MG | Bom Jesus do Galho    | 14.792    | 63    | 22   | 61    | 19   | 6   | 3   |
| MG | Bom Repouso           | 10.527    | 45    | 16   | 43    | 14   | 4   | 2   |
| MG | Bom Sucesso           | 17.612    | 75    | 26   | 72    | 23   | 7   | 3   |
| MG | Bonfim                | 6.852     | 30    | 11   | 28    | 9    | 3   | 1   |
| MG | Bonfinópolis de Minas | 5.397     | 23    | 8    | 23    | 7    | 3   | 1   |
| MG | Bonito de Minas       | 11.502    | 49    | 17   | 47    | 15   | 5   | 2   |
| MG | Borda da Mata         | 19.809    | 85    | 30   | 81    | 26   | 8   | 3   |
| MG | Botelhos              | 14.927    | 64    | 22   | 61    | 20   | 6   | 3   |
| MG | Botumirim             | 6.259     | 27    | 10   | 26    | 9    | 3   | 1   |
| MG | Brasilândia de Minas  | 16.950    | 73    | 25   | 70    | 22   | 7   | 3   |
| MG | Brasília de Minas     | 32.460    | 138   | 48   | 133   | 42   | 13  | 5   |
| MG | Brás Pires            | 4.255     | 19    | 7    | 18    | 6    | 2   | 1   |
| MG | Braúnas               | 4.737     | 21    | 7    | 20    | 7    | 2   | 1   |
| MG | Brazópolis            | 14.364    | 62    | 22   | 59    | 19   | 6   | 2   |
| MG | Brumadinho            | 41.208    | 176   | 61   | 169   | 53   | 16  | 6   |
| MG | Bueno Brandão         | 10.982    | 47    | 17   | 45    | 15   | 5   | 2   |
| MG | Buenópolis            | 10.342    | 44    | 16   | 43    | 14   | 4   | 2   |
| MG | Bugre                 | 3.984     | 17    | 6    | 17    | 6    | 2   | 1   |
| MG | Buritiz               | 25.179    | 108   | 38   | 103   | 33   | 10  | 4   |
| MG | Buritizzeiro          | 28.184    | 120   | 42   | 116   | 37   | 11  | 4   |
| MG | Cabeceira Grande      | 7.025     | 30    | 11   | 29    | 10   | 3   | 1   |
| MG | Cabo Verde            | 14.074    | 60    | 21   | 58    | 19   | 6   | 2   |
| MG | Cachoeira da Prata    | 3.580     | 16    | 6    | 15    | 5    | 2   | 1   |
| MG | Cachoeira de Minas    | 11.609    | 50    | 18   | 48    | 15   | 5   | 2   |
| MG | Cachoeira Dourada     | 2.720     | 12    | 5    | 12    | 4    | 2   | 1   |
| MG | Caetanópolis          | 11.869    | 51    | 18   | 49    | 16   | 5   | 2   |
| MG | Caeté                 | 45.364    | 193   | 67   | 186   | 59   | 18  | 7   |
| MG | Caiana                | 5.584     | 24    | 9    | 23    | 8    | 3   | 1   |
| MG | Cajuri                | 3.961     | 17    | 6    | 17    | 6    | 2   | 1   |
| MG | Caldas                | 14.600    | 63    | 22   | 60    | 19   | 6   | 2   |
| MG | Camacho               | 2.839     | 13    | 5    | 12    | 4    | 2   | 1   |
| MG | Camanducaia           | 21.831    | 93    | 33   | 90    | 28   | 9   | 3   |
| MG | Cambuí                | 30.068    | 128   | 45   | 123   | 39   | 12  | 5   |
| MG | Cambuquira            | 12.810    | 55    | 19   | 53    | 17   | 5   | 2   |
| MG | Campanário            | 3.739     | 16    | 6    | 16    | 5    | 2   | 1   |
| MG | Campanha              | 16.855    | 72    | 25   | 69    | 22   | 7   | 3   |
| MG | Campestre             | 21.052    | 90    | 31   | 86    | 28   | 8   | 3   |
| MG | Campina Verde         | 19.759    | 84    | 30   | 81    | 26   | 8   | 3   |
| MG | Campo Azul            | 3.830     | 17    | 6    | 16    | 5    | 2   | 1   |
| MG | Campo Belo            | 54.338    | 231   | 80   | 222   | 70   | 21  | 8   |
| MG | Campo do Meio         | 11.648    | 50    | 18   | 48    | 15   | 5   | 2   |
| MG | Campo Florido         | 8.383     | 36    | 13   | 35    | 11   | 4   | 2   |
| MG | Campos Altos          | 15.661    | 67    | 24   | 64    | 21   | 6   | 3   |
| MG | Campos Gerais         | 28.908    | 123   | 43   | 119   | 38   | 11  | 4   |
| MG | Canaã                 | 4.533     | 20    | 7    | 19    | 6    | 2   | 1   |
| MG | Canápolis             | 12.251    | 53    | 19   | 51    | 16   | 5   | 2   |
| MG | Cana Verde            | 5.585     | 24    | 9    | 23    | 8    | 3   | 1   |
| MG | Candeias              | 14.890    | 64    | 22   | 61    | 20   | 6   | 3   |

|    |                             |        |     |     |     |     |    |    |
|----|-----------------------------|--------|-----|-----|-----|-----|----|----|
| MG | Cantagalo                   | 4.575  | 20  | 7   | 19  | 6   | 2  | 1  |
| MG | Caparaó                     | 5.464  | 24  | 9   | 23  | 8   | 3  | 1  |
| MG | Capela Nova                 | 4.616  | 20  | 7   | 19  | 6   | 2  | 1  |
| MG | Capelinha                   | 38.321 | 163 | 57  | 157 | 50  | 15 | 6  |
| MG | Capetinga                   | 6.860  | 30  | 11  | 29  | 9   | 3  | 1  |
| MG | Capim Branco                | 9.896  | 43  | 15  | 41  | 13  | 4  | 2  |
| MG | Capinópolis                 | 16.294 | 70  | 24  | 67  | 21  | 7  | 3  |
| MG | Capitão Andrade             | 5.559  | 24  | 9   | 23  | 8   | 3  | 1  |
| MG | Capitão Enéas               | 15.388 | 66  | 23  | 63  | 20  | 6  | 3  |
| MG | Capitólio                   | 8.693  | 37  | 13  | 36  | 12  | 4  | 2  |
| MG | Caputira                    | 9.318  | 40  | 14  | 39  | 12  | 4  | 2  |
| MG | Carai                       | 23.872 | 102 | 36  | 98  | 31  | 10 | 4  |
| MG | Caranaíba                   | 3.150  | 14  | 5   | 13  | 5   | 2  | 1  |
| MG | Carandaí                    | 25.831 | 110 | 39  | 106 | 34  | 10 | 4  |
| MG | Carangola                   | 33.022 | 141 | 49  | 135 | 43  | 13 | 5  |
| MG | Caratinga                   | 93.124 | 396 | 138 | 381 | 120 | 36 | 13 |
| MG | Carbonita                   | 9.423  | 41  | 14  | 39  | 13  | 4  | 2  |
| MG | Careaçu                     | 6.826  | 30  | 11  | 28  | 9   | 3  | 1  |
| MG | Carlos Chagas               | 18.516 | 79  | 28  | 76  | 24  | 7  | 3  |
| MG | Carmésia                    | 2.660  | 12  | 4   | 11  | 4   | 2  | 1  |
| MG | Carmo da Cachoeira          | 12.193 | 52  | 18  | 50  | 16  | 5  | 2  |
| MG | Carmo da Mata               | 11.546 | 50  | 17  | 48  | 15  | 5  | 2  |
| MG | Carmo de Minas              | 15.031 | 64  | 23  | 62  | 20  | 6  | 3  |
| MG | Carmo do Cajuru             | 22.900 | 98  | 34  | 94  | 30  | 9  | 4  |
| MG | Carmo do Paranaíba          | 30.339 | 129 | 45  | 124 | 39  | 12 | 5  |
| MG | Carmo do Rio Claro          | 21.310 | 91  | 32  | 88  | 28  | 9  | 3  |
| MG | Carmópolis de Minas         | 19.756 | 84  | 30  | 81  | 26  | 8  | 3  |
| MG | Carneirinho                 | 10.103 | 43  | 15  | 42  | 13  | 4  | 2  |
| MG | Carrancas                   | 4.052  | 18  | 6   | 17  | 6   | 2  | 1  |
| MG | Carvalhópolis               | 3.614  | 16  | 6   | 15  | 5   | 2  | 1  |
| MG | Carvalhos                   | 4.445  | 19  | 7   | 19  | 6   | 2  | 1  |
| MG | Casa Grande                 | 2.251  | 10  | 4   | 10  | 3   | 1  | 1  |
| MG | Cascalho Rico               | 3.108  | 14  | 5   | 13  | 4   | 2  | 1  |
| MG | Cássia                      | 17.741 | 76  | 27  | 73  | 23  | 7  | 3  |
| MG | Conceição da Barra de Minas | 3.939  | 17  | 6   | 17  | 6   | 2  | 1  |
| MG | Cataguases                  | 75.942 | 323 | 112 | 311 | 98  | 29 | 11 |
| MG | Catas Altas                 | 5.465  | 24  | 9   | 23  | 8   | 3  | 1  |
| MG | Catas Altas da Noruega      | 3.665  | 16  | 6   | 15  | 5   | 2  | 1  |
| MG | Catuji                      | 6.206  | 27  | 10  | 26  | 8   | 3  | 1  |
| MG | Catuti                      | 4.944  | 22  | 8   | 21  | 7   | 2  | 1  |
| MG | Caxambu                     | 21.566 | 92  | 32  | 89  | 28  | 9  | 3  |
| MG | Cedro do Abaeté             | 1.150  | 5   | 2   | 5   | 2   | 1  | 1  |
| MG | Central de Minas            | 7.059  | 31  | 11  | 29  | 10  | 3  | 1  |
| MG | Centralina                  | 10.343 | 44  | 16  | 43  | 14  | 4  | 2  |
| MG | Chácara                     | 3.216  | 14  | 5   | 14  | 5   | 2  | 1  |
| MG | Chalé                       | 5.695  | 25  | 9   | 24  | 8   | 3  | 1  |
| MG | Chapada do Norte            | 15.334 | 66  | 23  | 63  | 20  | 6  | 3  |
| MG | Chapada Gaúcha              | 14.217 | 61  | 21  | 59  | 19  | 6  | 2  |
| MG | Chiador                     | 2.657  | 12  | 4   | 11  | 4   | 2  | 1  |
| MG | Cipotânea                   | 6.811  | 29  | 11  | 28  | 9   | 3  | 1  |
| MG | Claraval                    | 4.873  | 21  | 8   | 20  | 7   | 2  | 1  |
| MG | Claro dos Poções            | 7.478  | 32  | 12  | 31  | 10  | 3  | 2  |
| MG | Cláudio                     | 29.093 | 124 | 43  | 119 | 38  | 11 | 4  |
| MG | Coimbra                     | 7.631  | 33  | 12  | 32  | 10  | 3  | 2  |
| MG | Coluna                      | 8.810  | 38  | 13  | 36  | 12  | 4  | 2  |
| MG | Comendador Gomes            | 3.128  | 14  | 5   | 13  | 5   | 2  | 1  |
| MG | Comercinho                  | 6.624  | 29  | 10  | 28  | 9   | 3  | 1  |
| MG | Conceição da Aparecida      | 10.351 | 45  | 16  | 43  | 14  | 4  | 2  |
| MG | Conceição das Pedras        | 2.814  | 12  | 5   | 12  | 4   | 2  | 1  |
| MG | Conceição das Alagoas       | 28.782 | 123 | 43  | 118 | 37  | 11 | 4  |
| MG | Conceição de Ipanema        | 4.581  | 20  | 7   | 19  | 6   | 2  | 1  |
| MG | Conceição do Mato Dentro    | 17.438 | 75  | 26  | 72  | 23  | 7  | 3  |
| MG | Conceição do Pará           | 5.558  | 24  | 9   | 23  | 8   | 3  | 1  |
| MG | Conceição do Rio Verde      | 13.729 | 59  | 21  | 57  | 18  | 6  | 2  |
| MG | Conceição dos Ouros         | 11.852 | 51  | 18  | 49  | 16  | 5  | 2  |
| MG | Cônego Marinho              | 7.730  | 33  | 12  | 32  | 10  | 3  | 2  |

|    |                           |         |      |     |      |     |     |    |
|----|---------------------------|---------|------|-----|------|-----|-----|----|
| MG | Confins                   | 6.867   | 30   | 11  | 29   | 9   | 3   | 1  |
| MG | Congonhal                 | 12.209  | 52   | 18  | 50   | 16  | 5   | 2  |
| MG | Congonhas                 | 55.836  | 238  | 83  | 229  | 72  | 22  | 8  |
| MG | Congonhas do Norte        | 5.047   | 22   | 8   | 21   | 7   | 2   | 1  |
| MG | Conquista                 | 6.997   | 30   | 11  | 29   | 9   | 3   | 1  |
| MG | Conselheiro Lafaiete      | 130.584 | 556  | 193 | 534  | 168 | 50  | 18 |
| MG | Conselheiro Pena          | 22.975  | 98   | 34  | 94   | 30  | 9   | 4  |
| MG | Consolação                | 1.786   | 8    | 3   | 8    | 3   | 1   | 1  |
| MG | Contagem                  | 673.849 | 2865 | 992 | 2753 | 865 | 255 | 92 |
| MG | Coqueiral                 | 9.099   | 39   | 14  | 38   | 12  | 4   | 2  |
| MG | Coração de Jesus          | 26.620  | 114  | 40  | 109  | 35  | 11  | 4  |
| MG | Cordisburgo               | 8.903   | 38   | 14  | 37   | 12  | 4   | 2  |
| MG | Cordislândia              | 3.546   | 16   | 6   | 15   | 5   | 2   | 1  |
| MG | Corinto                   | 23.607  | 101  | 35  | 97   | 31  | 9   | 4  |
| MG | Coroaci                   | 9.897   | 43   | 15  | 41   | 13  | 4   | 2  |
| MG | Coromandel                | 27.958  | 119  | 42  | 115  | 36  | 11  | 4  |
| MG | Coronel Fabriciano        | 110.709 | 471  | 163 | 453  | 142 | 42  | 16 |
| MG | Coronel Murta             | 9.209   | 40   | 14  | 38   | 12  | 4   | 2  |
| MG | Coronel Pacheco           | 3.095   | 14   | 5   | 13   | 4   | 2   | 1  |
| MG | Coronel Xavier Chaves     | 3.448   | 15   | 6   | 15   | 5   | 2   | 1  |
| MG | Córrego Danta             | 3.168   | 14   | 5   | 13   | 5   | 2   | 1  |
| MG | Córrego do Bom Jesus      | 3.685   | 16   | 6   | 16   | 5   | 2   | 1  |
| MG | Córrego Fundo             | 6.425   | 28   | 10  | 27   | 9   | 3   | 1  |
| MG | Córrego Novo              | 2.688   | 12   | 4   | 11   | 4   | 2   | 1  |
| MG | Couto de Magalhães de Mir | 4.436   | 19   | 7   | 19   | 6   | 2   | 1  |
| MG | Crisólita                 | 6.814   | 29   | 11  | 28   | 9   | 3   | 1  |
| MG | Cristais                  | 13.060  | 56   | 20  | 54   | 17  | 5   | 2  |
| MG | Cristália                 | 5.992   | 26   | 9   | 25   | 8   | 3   | 1  |
| MG | Cristiano Ottoni          | 5.161   | 22   | 8   | 22   | 7   | 2   | 1  |
| MG | Cristina                  | 10.211  | 44   | 16  | 42   | 14  | 4   | 2  |
| MG | Crucilândia               | 5.072   | 22   | 8   | 21   | 7   | 2   | 1  |
| MG | Cruzeiro da Fortaleza     | 3.651   | 16   | 6   | 15   | 5   | 2   | 1  |
| MG | Cruzília                  | 15.529  | 67   | 23  | 64   | 20  | 6   | 3  |
| MG | Cuparaque                 | 5.026   | 22   | 8   | 21   | 7   | 2   | 1  |
| MG | Curral de Dentro          | 7.867   | 34   | 12  | 33   | 11  | 3   | 2  |
| MG | Curvelo                   | 81.085  | 345  | 120 | 332  | 104 | 31  | 11 |
| MG | Datas                     | 5.431   | 24   | 8   | 23   | 7   | 3   | 1  |
| MG | Delfim Moreira            | 8.007   | 35   | 12  | 33   | 11  | 4   | 2  |
| MG | Delfinópolis              | 7.146   | 31   | 11  | 30   | 10  | 3   | 1  |
| MG | Delta                     | 10.994  | 47   | 17  | 45   | 15  | 5   | 2  |
| MG | Descoberto                | 5.044   | 22   | 8   | 21   | 7   | 2   | 1  |
| MG | Desterro de Entre Rios    | 7.266   | 31   | 11  | 30   | 10  | 3   | 1  |
| MG | Desterro do Melo          | 2.867   | 13   | 5   | 12   | 4   | 2   | 1  |
| MG | Diamantina                | 47.924  | 204  | 71  | 196  | 62  | 19  | 7  |
| MG | Diogo de Vasconcelos      | 3.779   | 17   | 6   | 16   | 5   | 2   | 1  |
| MG | Dionísio                  | 7.493   | 32   | 12  | 31   | 10  | 3   | 2  |
| MG | Divinésia                 | 3.430   | 15   | 6   | 15   | 5   | 2   | 1  |
| MG | Divino                    | 20.020  | 86   | 30  | 82   | 26  | 8   | 3  |
| MG | Divino das Laranjeiras    | 4.969   | 22   | 8   | 21   | 7   | 2   | 1  |
| MG | Divinolândia de Minas     | 7.655   | 33   | 12  | 32   | 10  | 3   | 2  |
| MG | Divinópolis               | 242.505 | 1031 | 357 | 991  | 312 | 92  | 33 |
| MG | Divisa Alegre             | 6.946   | 30   | 11  | 29   | 9   | 3   | 1  |
| MG | Divisa Nova               | 6.039   | 26   | 9   | 25   | 8   | 3   | 1  |
| MG | Divisópolis               | 11.396  | 49   | 17  | 47   | 15  | 5   | 2  |
| MG | Dom Bosco                 | 3.635   | 16   | 6   | 15   | 5   | 2   | 1  |
| MG | Dom Cavati                | 5.025   | 22   | 8   | 21   | 7   | 2   | 1  |
| MG | Dom Joaquim               | 4.436   | 19   | 7   | 19   | 6   | 2   | 1  |
| MG | Dom Silvério              | 5.227   | 23   | 8   | 22   | 7   | 2   | 1  |
| MG | Dom Viçoso                | 2.992   | 13   | 5   | 13   | 4   | 2   | 1  |
| MG | Dona Euzébia              | 6.664   | 29   | 10  | 28   | 9   | 3   | 1  |
| MG | Dores de Campos           | 10.291  | 44   | 16  | 43   | 14  | 4   | 2  |
| MG | Dores de Guanhães         | 5.139   | 22   | 8   | 21   | 7   | 2   | 1  |
| MG | Dores do Indaiá           | 13.373  | 57   | 20  | 55   | 18  | 6   | 2  |
| MG | Dores do Turvo            | 4.202   | 18   | 7   | 18   | 6   | 2   | 1  |
| MG | Doresópolis               | 1.539   | 7    | 3   | 7    | 2   | 1   | 1  |
| MG | Douradoquara              | 1.915   | 9    | 3   | 8    | 3   | 1   | 1  |

|    |                           |         |      |     |      |     |     |    |
|----|---------------------------|---------|------|-----|------|-----|-----|----|
| MG | Durandé                   | 7.898   | 34   | 12  | 33   | 11  | 3   | 2  |
| MG | Elói Mendes               | 28.556  | 122  | 43  | 117  | 37  | 11  | 4  |
| MG | Engenheiro Caldas         | 11.268  | 48   | 17  | 47   | 15  | 5   | 2  |
| MG | Engenheiro Navarro        | 7.240   | 31   | 11  | 30   | 10  | 3   | 1  |
| MG | Entre Folhas              | 5.383   | 23   | 8   | 22   | 7   | 3   | 1  |
| MG | Entre Rios de Minas       | 15.458  | 66   | 23  | 64   | 20  | 6   | 3  |
| MG | Ervália                   | 19.019  | 81   | 28  | 78   | 25  | 8   | 3  |
| MG | Esmeraldas                | 72.512  | 309  | 107 | 297  | 94  | 28  | 10 |
| MG | Espera Feliz              | 25.287  | 108  | 38  | 104  | 33  | 10  | 4  |
| MG | Espinosa                  | 31.603  | 135  | 47  | 130  | 41  | 12  | 5  |
| MG | Espírito Santo do Dourado | 4.728   | 21   | 7   | 20   | 7   | 2   | 1  |
| MG | Estiva                    | 11.416  | 49   | 17  | 47   | 15  | 5   | 2  |
| MG | Estrela Dalva             | 2.308   | 10   | 4   | 10   | 3   | 1   | 1  |
| MG | Estrela do Indaiá         | 3.483   | 15   | 6   | 15   | 5   | 2   | 1  |
| MG | Estrela do Sul            | 8.057   | 35   | 12  | 33   | 11  | 4   | 2  |
| MG | Eugenópolis               | 11.383  | 49   | 17  | 47   | 15  | 5   | 2  |
| MG | Ewbank da Câmara          | 3.932   | 17   | 6   | 17   | 6   | 2   | 1  |
| MG | Extrema                   | 37.649  | 161  | 56  | 154  | 49  | 15  | 6  |
| MG | Fama                      | 2.374   | 11   | 4   | 10   | 4   | 1   | 1  |
| MG | Faria Lemos               | 3.202   | 14   | 5   | 14   | 5   | 2   | 1  |
| MG | Felício dos Santos        | 4.656   | 20   | 7   | 20   | 6   | 2   | 1  |
| MG | São Gonçalo do Rio Preto  | 3.178   | 14   | 5   | 13   | 5   | 2   | 1  |
| MG | Felisburgo                | 7.548   | 33   | 12  | 31   | 10  | 3   | 2  |
| MG | Felixlândia               | 15.528  | 67   | 23  | 64   | 20  | 6   | 3  |
| MG | Fernandes Tourinho        | 3.500   | 15   | 6   | 15   | 5   | 2   | 1  |
| MG | Ferros                    | 9.576   | 41   | 15  | 40   | 13  | 4   | 2  |
| MG | Fervedouro                | 11.100  | 48   | 17  | 46   | 15  | 5   | 2  |
| MG | Florestal                 | 7.602   | 33   | 12  | 32   | 10  | 3   | 2  |
| MG | Formiga                   | 67.956  | 289  | 101 | 278  | 88  | 26  | 10 |
| MG | Formoso                   | 9.810   | 42   | 15  | 41   | 13  | 4   | 2  |
| MG | Fortaleza de Minas        | 4.460   | 19   | 7   | 19   | 6   | 2   | 1  |
| MG | Fortuna de Minas          | 2.986   | 13   | 5   | 13   | 4   | 2   | 1  |
| MG | Francisco Badaró          | 10.311  | 44   | 16  | 43   | 14  | 4   | 2  |
| MG | Francisco Dumont          | 5.268   | 23   | 8   | 22   | 7   | 2   | 1  |
| MG | Francisco Sá              | 26.459  | 113  | 39  | 109  | 34  | 10  | 4  |
| MG | Franciscópolis            | 5.287   | 23   | 8   | 22   | 7   | 2   | 1  |
| MG | Frei Gaspar               | 5.858   | 25   | 9   | 24   | 8   | 3   | 1  |
| MG | Frei Inocência            | 9.716   | 42   | 15  | 40   | 13  | 4   | 2  |
| MG | Frei Lagonegro            | 3.496   | 15   | 6   | 15   | 5   | 2   | 1  |
| MG | Fronteira                 | 18.866  | 81   | 28  | 78   | 25  | 8   | 3  |
| MG | Fronteira dos Vales       | 4.542   | 20   | 7   | 19   | 6   | 2   | 1  |
| MG | Fruta de Leite            | 5.232   | 23   | 8   | 22   | 7   | 2   | 1  |
| MG | Frutal                    | 60.508  | 258  | 90  | 248  | 78  | 23  | 9  |
| MG | Funiândia                 | 4.434   | 19   | 7   | 19   | 6   | 2   | 1  |
| MG | Galliléia                 | 6.764   | 29   | 10  | 28   | 9   | 3   | 1  |
| MG | Gameleiras                | 5.084   | 22   | 8   | 21   | 7   | 2   | 1  |
| MG | Glaucilândia              | 3.177   | 14   | 5   | 13   | 5   | 2   | 1  |
| MG | Goiabeira                 | 3.402   | 15   | 6   | 14   | 5   | 2   | 1  |
| MG | Goianá                    | 4.014   | 18   | 6   | 17   | 6   | 2   | 1  |
| MG | Gonçalves                 | 4.360   | 19   | 7   | 18   | 6   | 2   | 1  |
| MG | Gonzaga                   | 6.184   | 27   | 10  | 26   | 8   | 3   | 1  |
| MG | Gouveia                   | 11.811  | 51   | 18  | 49   | 16  | 5   | 2  |
| MG | Governador Valadares      | 282.164 | 1200 | 416 | 1153 | 362 | 107 | 39 |
| MG | Grão Mogol                | 15.943  | 68   | 24  | 66   | 21  | 7   | 3  |
| MG | Grupiara                  | 1.386   | 6    | 3   | 6    | 2   | 1   | 1  |
| MG | Guanhães                  | 34.818  | 149  | 52  | 143  | 45  | 14  | 5  |
| MG | Guapé                     | 14.269  | 61   | 22  | 59   | 19  | 6   | 2  |
| MG | Guaraciaba                | 10.307  | 44   | 16  | 43   | 14  | 4   | 2  |
| MG | Guaraciama                | 5.005   | 22   | 8   | 21   | 7   | 2   | 1  |
| MG | Guaranésia                | 19.014  | 81   | 28  | 78   | 25  | 8   | 3  |
| MG | Guarani                   | 8.926   | 38   | 14  | 37   | 12  | 4   | 2  |
| MG | Guarará                   | 3.755   | 16   | 6   | 16   | 5   | 2   | 1  |
| MG | Guarda-Mor                | 6.558   | 28   | 10  | 27   | 9   | 3   | 1  |
| MG | Guaxupé                   | 52.234  | 223  | 77  | 214  | 67  | 20  | 8  |
| MG | Guidoval                  | 7.026   | 30   | 11  | 29   | 10  | 3   | 1  |
| MG | Guimarânia                | 8.168   | 35   | 13  | 34   | 11  | 4   | 2  |

|    |                       |         |      |     |      |     |     |    |
|----|-----------------------|---------|------|-----|------|-----|-----|----|
| MG | Guiricema             | 8.296   | 36   | 13  | 34   | 11  | 4   | 2  |
| MG | Gurinhata             | 5.516   | 24   | 9   | 23   | 8   | 3   | 1  |
| MG | Heliodora             | 6.623   | 29   | 10  | 28   | 9   | 3   | 1  |
| MG | Iapu                  | 11.085  | 48   | 17  | 46   | 15  | 5   | 2  |
| MG | Ibertioga             | 4.999   | 22   | 8   | 21   | 7   | 2   | 1  |
| MG | Ibia                  | 25.511  | 109  | 38  | 105  | 33  | 10  | 4  |
| MG | Ibiai                 | 8.478   | 37   | 13  | 35   | 11  | 4   | 2  |
| MG | Ibiracatu             | 5.340   | 23   | 8   | 22   | 7   | 3   | 1  |
| MG | Ibiraci               | 14.128  | 61   | 21  | 58   | 19  | 6   | 2  |
| MG | Ibitit                | 184.030 | 783  | 271 | 752  | 237 | 70  | 25 |
| MG | Ibitiura de Minas     | 3.497   | 15   | 6   | 15   | 5   | 2   | 1  |
| MG | Ibituruna             | 3.003   | 13   | 5   | 13   | 4   | 2   | 1  |
| MG | Icarai de Minas       | 12.200  | 52   | 18  | 50   | 16  | 5   | 2  |
| MG | Igarape               | 44.561  | 190  | 66  | 183  | 58  | 17  | 7  |
| MG | Igaratinga            | 11.146  | 48   | 17  | 46   | 15  | 5   | 2  |
| MG | Iguatama              | 7.901   | 34   | 12  | 33   | 11  | 3   | 2  |
| MG | Ijaci                 | 6.667   | 29   | 10  | 28   | 9   | 3   | 1  |
| MG | Ilicinea              | 12.511  | 54   | 19  | 52   | 17  | 5   | 2  |
| MG | Imbe de Minas         | 6.976   | 30   | 11  | 29   | 9   | 3   | 1  |
| MG | Inconfidentes         | 7.387   | 32   | 11  | 31   | 10  | 3   | 2  |
| MG | Indaiabira            | 7.328   | 32   | 11  | 30   | 10  | 3   | 1  |
| MG | Indianopolis          | 7.009   | 30   | 11  | 29   | 9   | 3   | 1  |
| MG | Ingai                 | 2.785   | 12   | 5   | 12   | 4   | 2   | 1  |
| MG | Inhapim               | 24.020  | 103  | 36  | 99   | 31  | 10  | 4  |
| MG | Inhauma               | 6.352   | 28   | 10  | 26   | 9   | 3   | 1  |
| MG | Inimutaba             | 7.605   | 33   | 12  | 32   | 10  | 3   | 2  |
| MG | Ipaba                 | 18.926  | 81   | 28  | 78   | 25  | 8   | 3  |
| MG | Ipanema               | 20.133  | 86   | 30  | 83   | 26  | 8   | 3  |
| MG | Ipatinga              | 267.333 | 1137 | 394 | 1092 | 343 | 101 | 37 |
| MG | Ipiaçu                | 4.229   | 18   | 7   | 18   | 6   | 2   | 1  |
| MG | Ipuina                | 10.156  | 44   | 15  | 42   | 14  | 4   | 2  |
| MG | Irai de Minas         | 7.067   | 31   | 11  | 29   | 10  | 3   | 1  |
| MG | Itabira               | 121.717 | 518  | 180 | 498  | 157 | 46  | 17 |
| MG | Itabirinha            | 11.637  | 50   | 18  | 48   | 15  | 5   | 2  |
| MG | Itabirito             | 52.996  | 226  | 79  | 217  | 68  | 21  | 8  |
| MG | Itacambira            | 5.447   | 24   | 9   | 23   | 7   | 3   | 1  |
| MG | Itacarambi            | 18.175  | 78   | 27  | 75   | 24  | 7   | 3  |
| MG | Itaguara              | 13.510  | 58   | 20  | 56   | 18  | 6   | 2  |
| MG | Itaipé                | 12.910  | 55   | 20  | 53   | 17  | 5   | 2  |
| MG | Itajuba               | 97.782  | 416  | 144 | 400  | 126 | 37  | 14 |
| MG | Itamarandiba          | 35.130  | 150  | 52  | 144  | 46  | 14  | 5  |
| MG | Itamarati de Minas    | 4.395   | 19   | 7   | 18   | 6   | 2   | 1  |
| MG | Itambacuri            | 23.207  | 99   | 35  | 95   | 30  | 9   | 4  |
| MG | Itambé do Mato Dentro | 2.032   | 9    | 3   | 9    | 3   | 1   | 1  |
| MG | Itamogi               | 10.122  | 44   | 15  | 42   | 13  | 4   | 2  |
| MG | Itamonte              | 15.844  | 68   | 24  | 65   | 21  | 6   | 3  |
| MG | Itanhandu             | 15.511  | 66   | 23  | 64   | 20  | 6   | 3  |
| MG | Itanhomi              | 12.259  | 53   | 19  | 51   | 16  | 5   | 2  |
| MG | Itaobim               | 20.997  | 90   | 31  | 86   | 27  | 8   | 3  |
| MG | Itapagipe             | 15.511  | 66   | 23  | 64   | 20  | 6   | 3  |
| MG | Itapeçerica           | 21.760  | 93   | 33  | 89   | 28  | 9   | 3  |
| MG | Itapeva               | 9.976   | 43   | 15  | 41   | 13  | 4   | 2  |
| MG | Itatiaiuçu            | 11.354  | 49   | 17  | 47   | 15  | 5   | 2  |
| MG | Itaú de Minas         | 16.286  | 70   | 24  | 67   | 21  | 7   | 3  |
| MG | Itauna                | 94.455  | 402  | 140 | 386  | 122 | 36  | 13 |
| MG | Itaverava             | 5.321   | 23   | 8   | 22   | 7   | 3   | 1  |
| MG | Itinga                | 15.053  | 64   | 23  | 62   | 20  | 6   | 3  |
| MG | Itueta                | 6.074   | 26   | 9   | 25   | 8   | 3   | 1  |
| MG | Ituiutaba             | 105.818 | 450  | 156 | 433  | 136 | 40  | 15 |
| MG | Itumirim              | 5.978   | 26   | 9   | 25   | 8   | 3   | 1  |
| MG | Iturama               | 40.101  | 171  | 60  | 164  | 52  | 16  | 6  |
| MG | Itutinga              | 3.749   | 16   | 6   | 16   | 5   | 2   | 1  |
| MG | Jaboticatubas         | 20.683  | 88   | 31  | 85   | 27  | 8   | 3  |
| MG | Jacinto               | 12.320  | 53   | 19  | 51   | 16  | 5   | 2  |
| MG | Jacuí                 | 7.695   | 33   | 12  | 32   | 10  | 3   | 2  |
| MG | Jacutinga             | 26.538  | 113  | 40  | 109  | 35  | 11  | 4  |



|    |                         |         |      |     |      |     |     |    |
|----|-------------------------|---------|------|-----|------|-----|-----|----|
| MG | Jaguaraçu               | 3.151   | 14   | 5   | 13   | 5   | 2   | 1  |
| MG | Jaíba                   | 39.850  | 170  | 59  | 163  | 52  | 16  | 6  |
| MG | Jampruca                | 5.453   | 24   | 9   | 23   | 7   | 3   | 1  |
| MG | Janaúba                 | 72.374  | 308  | 107 | 296  | 93  | 28  | 10 |
| MG | Januária                | 67.958  | 289  | 101 | 278  | 88  | 26  | 10 |
| MG | Japaraíba               | 4.418   | 19   | 7   | 19   | 6   | 2   | 1  |
| MG | Japonvar                | 7.991   | 34   | 12  | 33   | 11  | 4   | 2  |
| MG | Jeceaba                 | 4.795   | 21   | 8   | 20   | 7   | 2   | 1  |
| MG | Jenipapo de Minas       | 7.781   | 34   | 12  | 32   | 10  | 3   | 2  |
| MG | Jequeri                 | 12.246  | 53   | 19  | 51   | 16  | 5   | 2  |
| MG | Jequitai                | 7.407   | 32   | 11  | 31   | 10  | 3   | 2  |
| MG | Jequitibá               | 5.203   | 23   | 8   | 22   | 7   | 2   | 1  |
| MG | Jequitinhonha           | 25.555  | 109  | 38  | 105  | 33  | 10  | 4  |
| MG | Jesuânia                | 4.774   | 21   | 8   | 20   | 7   | 2   | 1  |
| MG | Joáima                  | 15.476  | 66   | 23  | 64   | 20  | 6   | 3  |
| MG | Joanésia                | 4.382   | 19   | 7   | 18   | 6   | 2   | 1  |
| MG | João Monlevade          | 80.903  | 344  | 120 | 331  | 104 | 31  | 11 |
| MG | João Pinheiro           | 47.990  | 205  | 71  | 197  | 62  | 19  | 7  |
| MG | Joaquim Felício         | 4.757   | 21   | 8   | 20   | 7   | 2   | 1  |
| MG | Jordânia                | 10.872  | 47   | 17  | 45   | 14  | 5   | 2  |
| MG | José Gonçalves de Minas | 4.474   | 20   | 7   | 19   | 6   | 2   | 1  |
| MG | José Raydan             | 5.104   | 22   | 8   | 21   | 7   | 2   | 1  |
| MG | Josenópolis             | 4.911   | 21   | 8   | 21   | 7   | 2   | 1  |
| MG | Nova União              | 5.739   | 25   | 9   | 24   | 8   | 3   | 1  |
| MG | Juatuba                 | 27.823  | 119  | 41  | 114  | 36  | 11  | 4  |
| MG | Juiz de Fora            | 577.532 | 2456 | 851 | 2359 | 741 | 219 | 79 |
| MG | Juramento               | 4.359   | 19   | 7   | 18   | 6   | 2   | 1  |
| MG | Juruiaia                | 10.795  | 46   | 16  | 45   | 14  | 5   | 2  |
| MG | Juvenília               | 5.706   | 25   | 9   | 24   | 8   | 3   | 1  |
| MG | Ladainha                | 18.272  | 78   | 27  | 75   | 24  | 7   | 3  |
| MG | Lagamar                 | 7.588   | 33   | 12  | 31   | 10  | 3   | 2  |
| MG | Lagoa da Prata          | 53.236  | 227  | 79  | 218  | 69  | 21  | 8  |
| MG | Lagoa dos Patos         | 4.062   | 18   | 6   | 17   | 6   | 2   | 1  |
| MG | Lagoa Dourada           | 13.115  | 56   | 20  | 54   | 17  | 5   | 2  |
| MG | Lagoa Formosa           | 18.168  | 78   | 27  | 75   | 24  | 7   | 3  |
| MG | Lagoa Grande            | 9.681   | 42   | 15  | 40   | 13  | 4   | 2  |
| MG | Lagoa Santa             | 66.744  | 284  | 99  | 273  | 86  | 26  | 10 |
| MG | Lajinha                 | 19.914  | 85   | 30  | 82   | 26  | 8   | 3  |
| MG | Lambari                 | 20.995  | 90   | 31  | 86   | 27  | 8   | 3  |
| MG | Lamim                   | 3.366   | 15   | 5   | 14   | 5   | 2   | 1  |
| MG | Laranjal                | 6.856   | 30   | 11  | 29   | 9   | 3   | 1  |
| MG | Lassance                | 6.494   | 28   | 10  | 27   | 9   | 3   | 1  |
| MG | Lavras                  | 105.756 | 450  | 156 | 432  | 136 | 40  | 15 |
| MG | Leandro Ferreira        | 3.222   | 14   | 5   | 14   | 5   | 2   | 1  |
| MG | Leme do Prado           | 4.923   | 21   | 8   | 21   | 7   | 2   | 1  |
| MG | Leopoldina              | 52.690  | 224  | 78  | 216  | 68  | 20  | 8  |
| MG | Liberdade               | 4.994   | 22   | 8   | 21   | 7   | 2   | 1  |
| MG | Lima Duarte             | 16.749  | 72   | 25  | 69   | 22  | 7   | 3  |
| MG | Limeira do Oeste        | 7.640   | 33   | 12  | 32   | 10  | 3   | 2  |
| MG | Lontra                  | 9.766   | 42   | 15  | 40   | 13  | 4   | 2  |
| MG | Luisburgo               | 6.249   | 27   | 10  | 26   | 9   | 3   | 1  |
| MG | Luislândia              | 6.735   | 29   | 10  | 28   | 9   | 3   | 1  |
| MG | Luminárias              | 5.431   | 24   | 8   | 23   | 7   | 3   | 1  |
| MG | Luz                     | 18.297  | 78   | 27  | 75   | 24  | 7   | 3  |
| MG | Machacalis              | 7.112   | 31   | 11  | 30   | 10  | 3   | 1  |
| MG | Machado                 | 42.682  | 182  | 63  | 175  | 55  | 17  | 6  |
| MG | Madre de Deus de Minas  | 5.119   | 22   | 8   | 21   | 7   | 2   | 1  |
| MG | Malacacheta             | 18.556  | 79   | 28  | 76   | 24  | 8   | 3  |
| MG | Mamonas                 | 6.565   | 28   | 10  | 27   | 9   | 3   | 1  |
| MG | Manga                   | 18.051  | 77   | 27  | 74   | 24  | 7   | 3  |
| MG | Manhuaçu                | 92.074  | 392  | 136 | 377  | 119 | 35  | 13 |
| MG | Manhumirim              | 22.894  | 98   | 34  | 94   | 30  | 9   | 4  |
| MG | Mantena                 | 27.651  | 118  | 41  | 113  | 36  | 11  | 4  |
| MG | Maravilhas              | 8.113   | 35   | 12  | 34   | 11  | 4   | 2  |
| MG | Mar de Espanha          | 12.985  | 56   | 20  | 54   | 17  | 5   | 2  |
| MG | Maria da Fé             | 14.019  | 60   | 21  | 58   | 18  | 6   | 2  |

|    |                       |         |      |     |      |     |     |    |
|----|-----------------------|---------|------|-----|------|-----|-----|----|
| MG | Mariana               | 61.830  | 263  | 92  | 253  | 80  | 24  | 9  |
| MG | Marilac               | 4.079   | 18   | 7   | 17   | 6   | 2   | 1  |
| MG | Mário Campos          | 15.814  | 68   | 24  | 65   | 21  | 6   | 3  |
| MG | Maripá de Minas       | 3.000   | 13   | 5   | 13   | 4   | 2   | 1  |
| MG | Marliéria             | 4.030   | 18   | 6   | 17   | 6   | 2   | 1  |
| MG | Marmelópolis          | 2.701   | 12   | 4   | 12   | 4   | 2   | 1  |
| MG | Martinho Campos       | 13.497  | 58   | 20  | 56   | 18  | 6   | 2  |
| MG | Martins Soares        | 8.640   | 37   | 13  | 36   | 12  | 4   | 2  |
| MG | Mata Verde            | 8.700   | 37   | 13  | 36   | 12  | 4   | 2  |
| MG | Materlândia           | 4.415   | 19   | 7   | 19   | 6   | 2   | 1  |
| MG | Mateus Leme           | 31.631  | 135  | 47  | 130  | 41  | 12  | 5  |
| MG | Matias Barbosa        | 14.626  | 63   | 22  | 60   | 19  | 6   | 2  |
| MG | Matias Cardoso        | 11.360  | 49   | 17  | 47   | 15  | 5   | 2  |
| MG | Matipó                | 19.098  | 82   | 29  | 79   | 25  | 8   | 3  |
| MG | Mato Verde            | 12.367  | 53   | 19  | 51   | 16  | 5   | 2  |
| MG | Matozinhos            | 38.469  | 164  | 57  | 158  | 50  | 15  | 6  |
| MG | Matutina              | 3.733   | 16   | 6   | 16   | 5   | 2   | 1  |
| MG | Medeiros              | 3.861   | 17   | 6   | 16   | 5   | 2   | 1  |
| MG | Medina                | 20.701  | 89   | 31  | 85   | 27  | 8   | 3  |
| MG | Mendes Pimentel       | 6.446   | 28   | 10  | 27   | 9   | 3   | 1  |
| MG | Mercês                | 10.775  | 46   | 16  | 45   | 14  | 5   | 2  |
| MG | Mesquita              | 5.489   | 24   | 9   | 23   | 8   | 3   | 1  |
| MG | Minas Novas           | 31.509  | 134  | 47  | 129  | 41  | 12  | 5  |
| MG | Minduri               | 3.891   | 17   | 6   | 16   | 5   | 2   | 1  |
| MG | Mirabela              | 13.651  | 59   | 21  | 56   | 18  | 6   | 2  |
| MG | Miradouro             | 10.818  | 46   | 16  | 45   | 14  | 5   | 2  |
| MG | Mirai                 | 15.205  | 65   | 23  | 63   | 20  | 6   | 3  |
| MG | Miravânia             | 4.939   | 21   | 8   | 21   | 7   | 2   | 1  |
| MG | Moeda                 | 4.948   | 22   | 8   | 21   | 7   | 2   | 1  |
| MG | Moema                 | 7.589   | 33   | 12  | 31   | 10  | 3   | 2  |
| MG | Monjolos              | 2.184   | 10   | 4   | 9    | 3   | 1   | 1  |
| MG | Monsenhor Paulo       | 8.764   | 38   | 13  | 36   | 12  | 4   | 2  |
| MG | Montalvânia           | 14.621  | 63   | 22  | 60   | 19  | 6   | 2  |
| MG | Monte Alegre de Minas | 21.349  | 91   | 32  | 88   | 28  | 9   | 3  |
| MG | Monte Azul            | 20.544  | 88   | 31  | 84   | 27  | 8   | 3  |
| MG | Monte Belo            | 13.139  | 56   | 20  | 54   | 17  | 5   | 2  |
| MG | Monte Carmelo         | 48.049  | 205  | 71  | 197  | 62  | 19  | 7  |
| MG | Monte Formoso         | 4.939   | 21   | 8   | 21   | 7   | 2   | 1  |
| MG | Monte Santo de Minas  | 21.504  | 92   | 32  | 88   | 28  | 9   | 3  |
| MG | Montes Claros         | 417.478 | 1775 | 615 | 1706 | 536 | 158 | 57 |
| MG | Monte São             | 24.247  | 104  | 36  | 100  | 32  | 10  | 4  |
| MG | Montezuma             | 8.379   | 36   | 13  | 35   | 11  | 4   | 2  |
| MG | Morada Nova de Minas  | 8.955   | 39   | 14  | 37   | 12  | 4   | 2  |
| MG | Morro da Garça        | 2.413   | 11   | 4   | 10   | 4   | 1   | 1  |
| MG | Morro do Pilar        | 3.126   | 14   | 5   | 13   | 5   | 2   | 1  |
| MG | Munhoz                | 5.960   | 26   | 9   | 25   | 8   | 3   | 1  |
| MG | Muriaé                | 109.997 | 468  | 162 | 450  | 142 | 42  | 15 |
| MG | Mutum                 | 26.945  | 115  | 40  | 111  | 35  | 11  | 4  |
| MG | Muzambinho            | 20.522  | 88   | 31  | 84   | 27  | 8   | 3  |
| MG | Nacip Raydan          | 3.221   | 14   | 5   | 14   | 5   | 2   | 1  |
| MG | Nanuque               | 40.583  | 173  | 60  | 166  | 53  | 16  | 6  |
| MG | Naque                 | 7.104   | 31   | 11  | 30   | 10  | 3   | 1  |
| MG | Natalândia            | 3.306   | 15   | 5   | 14   | 5   | 2   | 1  |
| MG | Natércia              | 4.727   | 21   | 7   | 20   | 7   | 2   | 1  |
| MG | Nazareno              | 8.710   | 38   | 13  | 36   | 12  | 4   | 2  |
| MG | Nepomuceno            | 26.882  | 115  | 40  | 110  | 35  | 11  | 4  |
| MG | Ninheira              | 10.355  | 45   | 16  | 43   | 14  | 4   | 2  |
| MG | Nova Belém            | 3.067   | 14   | 5   | 13   | 4   | 2   | 1  |
| MG | Nova Era              | 17.524  | 75   | 26  | 72   | 23  | 7   | 3  |
| MG | Nova Lima             | 97.378  | 414  | 144 | 398  | 125 | 37  | 14 |
| MG | Nova Módica           | 3.548   | 16   | 6   | 15   | 5   | 2   | 1  |
| MG | Nova Ponte            | 16.046  | 69   | 24  | 66   | 21  | 7   | 3  |
| MG | Nova Porteirinha      | 7.493   | 32   | 12  | 31   | 10  | 3   | 2  |
| MG | Nova Resende          | 16.937  | 73   | 25  | 70   | 22  | 7   | 3  |
| MG | Nova Serrana          | 108.241 | 461  | 160 | 443  | 139 | 41  | 15 |
| MG | Novo Cruzeiro         | 31.339  | 134  | 47  | 128  | 41  | 12  | 5  |

|    |                         |         |     |     |     |     |    |    |
|----|-------------------------|---------|-----|-----|-----|-----|----|----|
| MG | Novo Oriente de Minas   | 10.800  | 46  | 16  | 45  | 14  | 5  | 2  |
| MG | Novorizonte             | 5.348   | 23  | 8   | 22  | 7   | 3  | 1  |
| MG | Olaria                  | 1.694   | 8   | 3   | 7   | 3   | 1  | 1  |
| MG | Olhos-d'Água            | 6.243   | 27  | 10  | 26  | 9   | 3  | 1  |
| MG | Olímpio Noronha         | 2.829   | 13  | 5   | 12  | 4   | 2  | 1  |
| MG | Oliveira                | 41.987  | 179 | 62  | 172 | 54  | 16 | 6  |
| MG | Oliveira Fortes         | 2.128   | 10  | 4   | 9   | 3   | 1  | 1  |
| MG | Onça de Pitangui        | 3.155   | 14  | 5   | 13  | 5   | 2  | 1  |
| MG | Oratórios               | 4.671   | 20  | 7   | 20  | 6   | 2  | 1  |
| MG | Orizânia                | 8.138   | 35  | 12  | 34  | 11  | 4  | 2  |
| MG | Ouro Branco             | 40.220  | 171 | 60  | 165 | 52  | 16 | 6  |
| MG | Ouro Fino               | 33.938  | 145 | 50  | 139 | 44  | 13 | 5  |
| MG | Ouro Preto              | 74.824  | 319 | 111 | 306 | 96  | 29 | 11 |
| MG | Ouro Verde de Minas     | 5.895   | 26  | 9   | 25  | 8   | 3  | 1  |
| MG | Padre Carvalho          | 6.466   | 28  | 10  | 27  | 9   | 3  | 1  |
| MG | Padre Paraíso           | 20.346  | 87  | 30  | 84  | 27  | 8  | 3  |
| MG | Paineiras               | 4.440   | 19  | 7   | 19  | 6   | 2  | 1  |
| MG | Pains                   | 8.308   | 36  | 13  | 34  | 11  | 4  | 2  |
| MG | Pai Pedro               | 6.098   | 26  | 9   | 25  | 8   | 3  | 1  |
| MG | Paiva                   | 1.517   | 7   | 3   | 7   | 2   | 1  | 1  |
| MG | Palma                   | 6.606   | 29  | 10  | 27  | 9   | 3  | 1  |
| MG | Palmópolis              | 5.196   | 23  | 8   | 22  | 7   | 2  | 1  |
| MG | Papagaios               | 15.922  | 68  | 24  | 66  | 21  | 7  | 3  |
| MG | Paracatu                | 94.539  | 402 | 140 | 387 | 122 | 36 | 13 |
| MG | Pará de Minas           | 95.616  | 407 | 141 | 391 | 123 | 37 | 13 |
| MG | Paraguaçu               | 21.693  | 93  | 32  | 89  | 28  | 9  | 3  |
| MG | Paraisópolis            | 21.353  | 91  | 32  | 88  | 28  | 9  | 3  |
| MG | Paraopeba               | 24.854  | 106 | 37  | 102 | 32  | 10 | 4  |
| MG | Passabém                | 1.619   | 7   | 3   | 7   | 3   | 1  | 1  |
| MG | Passa Quatro            | 16.439  | 70  | 25  | 68  | 22  | 7  | 3  |
| MG | Passa Tempo             | 8.031   | 35  | 12  | 33  | 11  | 4  | 2  |
| MG | Passa Vinte             | 2.024   | 9   | 3   | 9   | 3   | 1  | 1  |
| MG | Passos                  | 115.970 | 494 | 171 | 474 | 149 | 44 | 16 |
| MG | Patis                   | 6.031   | 26  | 9   | 25  | 8   | 3  | 1  |
| MG | Patos de Minas          | 154.641 | 658 | 228 | 632 | 199 | 59 | 21 |
| MG | Patrocínio              | 92.116  | 392 | 136 | 377 | 119 | 35 | 13 |
| MG | Patrocínio do Muriaé    | 5.744   | 25  | 9   | 24  | 8   | 3  | 1  |
| MG | Paula Cândido           | 9.597   | 41  | 15  | 40  | 13  | 4  | 2  |
| MG | Paulistas               | 4.794   | 21  | 8   | 20  | 7   | 2  | 1  |
| MG | Pavão                   | 8.390   | 36  | 13  | 35  | 11  | 4  | 2  |
| MG | Peçanha                 | 17.534  | 75  | 26  | 72  | 23  | 7  | 3  |
| MG | Pedra Azul              | 24.333  | 104 | 36  | 100 | 32  | 10 | 4  |
| MG | Pedra Bonita            | 7.157   | 31  | 11  | 30  | 10  | 3  | 1  |
| MG | Pedra do Anta           | 2.960   | 13  | 5   | 13  | 4   | 2  | 1  |
| MG | Pedra do Indaiá         | 3.977   | 17  | 6   | 17  | 6   | 2  | 1  |
| MG | Pedra Dourada           | 2.559   | 11  | 4   | 11  | 4   | 1  | 1  |
| MG | Pedralva                | 11.098  | 48  | 17  | 46  | 15  | 5  | 2  |
| MG | Pedras de Maria da Cruz | 12.313  | 53  | 19  | 51  | 16  | 5  | 2  |
| MG | Pedrinópolis            | 3.651   | 16  | 6   | 15  | 5   | 2  | 1  |
| MG | Pedro Leopoldo          | 65.149  | 277 | 96  | 267 | 84  | 25 | 9  |
| MG | Pedro Teixeira          | 1.804   | 8   | 3   | 8   | 3   | 1  | 1  |
| MG | Pequerí                 | 3.340   | 15  | 5   | 14  | 5   | 2  | 1  |
| MG | Pequi                   | 4.457   | 19  | 7   | 19  | 6   | 2  | 1  |
| MG | Perdigão                | 11.994  | 51  | 18  | 49  | 16  | 5  | 2  |
| MG | Perdizes                | 16.469  | 71  | 25  | 68  | 22  | 7  | 3  |
| MG | Perdões                 | 21.577  | 92  | 32  | 89  | 28  | 9  | 3  |
| MG | Periquito               | 6.738   | 29  | 10  | 28  | 9   | 3  | 1  |
| MG | Pescador                | 4.261   | 19  | 7   | 18  | 6   | 2  | 1  |
| MG | Piau                    | 2.719   | 12  | 5   | 12  | 4   | 2  | 1  |
| MG | Piedade de Caratinga    | 8.832   | 38  | 13  | 37  | 12  | 4  | 2  |
| MG | Piedade de Ponte Nova   | 4.141   | 18  | 7   | 17  | 6   | 2  | 1  |
| MG | Piedade do Rio Grande   | 4.436   | 19  | 7   | 19  | 6   | 2  | 1  |
| MG | Piedade dos Gerais      | 5.034   | 22  | 8   | 21  | 7   | 2  | 1  |
| MG | Pimenta                 | 8.715   | 38  | 13  | 36  | 12  | 4  | 2  |
| MG | Pingo-d'Água            | 5.029   | 22  | 8   | 21  | 7   | 2  | 1  |
| MG | Pintópolis              | 7.540   | 33  | 12  | 31  | 10  | 3  | 2  |

|    |                       |         |      |     |      |     |     |    |
|----|-----------------------|---------|------|-----|------|-----|-----|----|
| MG | Piracema              | 6.386   | 28   | 10  | 27   | 9   | 3   | 1  |
| MG | Pirajuba              | 6.491   | 28   | 10  | 27   | 9   | 3   | 1  |
| MG | Piranga               | 17.641  | 75   | 26  | 73   | 23  | 7   | 3  |
| MG | Piranguçu             | 5.504   | 24   | 9   | 23   | 8   | 3   | 1  |
| MG | Piranguinho           | 8.683   | 37   | 13  | 36   | 12  | 4   | 2  |
| MG | Pirapetinga           | 10.791  | 46   | 16  | 45   | 14  | 5   | 2  |
| MG | Pirapora              | 56.845  | 242  | 84  | 233  | 73  | 22  | 8  |
| MG | Piraúba               | 10.732  | 46   | 16  | 44   | 14  | 5   | 2  |
| MG | Pitangui              | 28.433  | 121  | 42  | 117  | 37  | 11  | 4  |
| MG | Piumhi                | 35.137  | 150  | 52  | 144  | 46  | 14  | 5  |
| MG | Planura               | 12.445  | 53   | 19  | 51   | 16  | 5   | 2  |
| MG | Poço Fundo            | 16.900  | 72   | 25  | 70   | 22  | 7   | 3  |
| MG | Poços de Caldas       | 169.838 | 723  | 250 | 694  | 218 | 65  | 24 |
| MG | Pocrane               | 8.288   | 36   | 13  | 34   | 11  | 4   | 2  |
| MG | Pompéu                | 32.248  | 138  | 48  | 132  | 42  | 13  | 5  |
| MG | Ponte Nova            | 60.003  | 256  | 89  | 246  | 77  | 23  | 9  |
| MG | Ponto Chique          | 4.305   | 19   | 7   | 18   | 6   | 2   | 1  |
| MG | Ponto dos Volantes    | 12.235  | 53   | 19  | 50   | 16  | 5   | 2  |
| MG | Porteirinha           | 37.823  | 161  | 56  | 155  | 49  | 15  | 6  |
| MG | Porto Firme           | 11.414  | 49   | 17  | 47   | 15  | 5   | 2  |
| MG | Poté                  | 16.675  | 71   | 25  | 69   | 22  | 7   | 3  |
| MG | Pouso Alegre          | 154.293 | 656  | 228 | 631  | 198 | 59  | 21 |
| MG | Pouso Alto            | 5.862   | 25   | 9   | 24   | 8   | 3   | 1  |
| MG | Prados                | 9.128   | 39   | 14  | 38   | 12  | 4   | 2  |
| MG | Prata                 | 28.173  | 120  | 42  | 116  | 37  | 11  | 4  |
| MG | Pratápolis            | 8.530   | 37   | 13  | 35   | 11  | 4   | 2  |
| MG | Pratinha              | 3.658   | 16   | 6   | 15   | 5   | 2   | 1  |
| MG | Presidente Bernardes  | 5.315   | 23   | 8   | 22   | 7   | 3   | 1  |
| MG | Presidente Juscelino  | 3.572   | 16   | 6   | 15   | 5   | 2   | 1  |
| MG | Presidente Kubitschek | 3.000   | 13   | 5   | 13   | 4   | 2   | 1  |
| MG | Presidente Olegário   | 19.680  | 84   | 29  | 81   | 26  | 8   | 3  |
| MG | Alto Jequitibá        | 8.286   | 36   | 13  | 34   | 11  | 4   | 2  |
| MG | Prudente de Morais    | 10.931  | 47   | 17  | 45   | 15  | 5   | 2  |
| MG | Quartel Geral         | 3.603   | 16   | 6   | 15   | 5   | 2   | 1  |
| MG | Queluzito             | 1.948   | 9    | 3   | 8    | 3   | 1   | 1  |
| MG | Raposos               | 16.501  | 71   | 25  | 68   | 22  | 7   | 3  |
| MG | Raul Soares           | 23.663  | 101  | 35  | 97   | 31  | 9   | 4  |
| MG | Recreio               | 10.522  | 45   | 16  | 43   | 14  | 4   | 2  |
| MG | Reduto                | 7.247   | 31   | 11  | 30   | 10  | 3   | 1  |
| MG | Resende Costa         | 11.578  | 50   | 18  | 48   | 15  | 5   | 2  |
| MG | Resplendor            | 17.396  | 74   | 26  | 72   | 23  | 7   | 3  |
| MG | Ressaquinha           | 4.826   | 21   | 8   | 20   | 7   | 2   | 1  |
| MG | Riachinho             | 8.132   | 35   | 12  | 34   | 11  | 4   | 2  |
| MG | Riacho dos Machados   | 9.471   | 41   | 14  | 39   | 13  | 4   | 2  |
| MG | Ribeirão das Neves    | 341.415 | 1452 | 503 | 1395 | 438 | 129 | 47 |
| MG | Ribeirão Vermelho     | 4.061   | 18   | 6   | 17   | 6   | 2   | 1  |
| MG | Rio Acima             | 10.524  | 45   | 16  | 43   | 14  | 4   | 2  |
| MG | Rio Casca             | 13.384  | 57   | 20  | 55   | 18  | 6   | 2  |
| MG | Rio Doce              | 2.630   | 12   | 4   | 11   | 4   | 1   | 1  |
| MG | Rio do Prado          | 5.117   | 22   | 8   | 21   | 7   | 2   | 1  |
| MG | Rio Espera            | 5.332   | 23   | 8   | 22   | 7   | 3   | 1  |
| MG | Rio Manso             | 5.924   | 26   | 9   | 25   | 8   | 3   | 1  |
| MG | Rio Novo              | 8.964   | 39   | 14  | 37   | 12  | 4   | 2  |
| MG | Rio Paranaíba         | 12.356  | 53   | 19  | 51   | 16  | 5   | 2  |
| MG | Rio Pardo de Minas    | 31.171  | 133  | 46  | 128  | 40  | 12  | 5  |
| MG | Rio Piracicaba        | 14.325  | 61   | 22  | 59   | 19  | 6   | 2  |
| MG | Rio Pomba             | 18.007  | 77   | 27  | 74   | 24  | 7   | 3  |
| MG | Rio Preto             | 5.493   | 24   | 9   | 23   | 8   | 3   | 1  |
| MG | Rio Vermelho          | 12.635  | 54   | 19  | 52   | 17  | 5   | 2  |
| MG | Ritápolis             | 4.521   | 20   | 7   | 19   | 6   | 2   | 1  |
| MG | Rochedo de Minas      | 2.335   | 10   | 4   | 10   | 3   | 1   | 1  |
| MG | Rodeiro               | 8.333   | 36   | 13  | 35   | 11  | 4   | 2  |
| MG | Romaria               | 3.507   | 15   | 6   | 15   | 5   | 2   | 1  |
| MG | Rosário da Limeira    | 4.648   | 20   | 7   | 19   | 6   | 2   | 1  |
| MG | Rubelita              | 5.609   | 24   | 9   | 23   | 8   | 3   | 1  |
| MG | Rubim                 | 10.269  | 44   | 16  | 42   | 14  | 4   | 2  |

|    |                              |         |     |     |     |     |    |    |
|----|------------------------------|---------|-----|-----|-----|-----|----|----|
| MG | Sabará                       | 137.877 | 587 | 203 | 564 | 177 | 53 | 19 |
| MG | Sabinópolis                  | 15.364  | 66  | 23  | 63  | 20  | 6  | 3  |
| MG | Sacramento                   | 26.556  | 113 | 40  | 109 | 35  | 11 | 4  |
| MG | Salinas                      | 41.864  | 178 | 62  | 171 | 54  | 16 | 6  |
| MG | Salto da Divisa              | 7.014   | 30  | 11  | 29  | 9   | 3  | 1  |
| MG | Santa Bárbara                | 31.873  | 136 | 47  | 131 | 41  | 13 | 5  |
| MG | Santa Bárbara do Leste       | 8.212   | 35  | 13  | 34  | 11  | 4  | 2  |
| MG | Santa Bárbara do Monte Verde | 3.212   | 14  | 5   | 14  | 5   | 2  | 1  |
| MG | Santa Bárbara do Tugúrio     | 4.385   | 19  | 7   | 18  | 6   | 2  | 1  |
| MG | Santa Cruz de Minas          | 8.723   | 38  | 13  | 36  | 12  | 4  | 2  |
| MG | Santa Cruz de Salinas        | 4.074   | 18  | 6   | 17  | 6   | 2  | 1  |
| MG | Santa Cruz do Escalvado      | 4.693   | 20  | 7   | 20  | 7   | 2  | 1  |
| MG | Santa Efigênia de Minas      | 4.354   | 19  | 7   | 18  | 6   | 2  | 1  |
| MG | Santa Fé de Minas            | 3.806   | 17  | 6   | 16  | 5   | 2  | 1  |
| MG | Santa Helena de Minas        | 6.406   | 28  | 10  | 27  | 9   | 3  | 1  |
| MG | Santa Juliana                | 14.497  | 62  | 22  | 60  | 19  | 6  | 2  |
| MG | Santa Luzia                  | 221.705 | 943 | 327 | 906 | 285 | 84 | 31 |
| MG | Santa Margarida              | 16.393  | 70  | 25  | 67  | 22  | 7  | 3  |
| MG | Santa Maria de Itabira       | 10.867  | 47  | 16  | 45  | 14  | 5  | 2  |
| MG | Santa Maria do Salto         | 5.203   | 23  | 8   | 22  | 7   | 2  | 1  |
| MG | Santa Maria do Suaçuí        | 14.607  | 63  | 22  | 60  | 19  | 6  | 2  |
| MG | Santana da Vargem            | 7.047   | 30  | 11  | 29  | 10  | 3  | 1  |
| MG | Santana de Cataguases        | 3.909   | 17  | 6   | 16  | 6   | 2  | 1  |
| MG | Santana de Pirapama          | 7.538   | 33  | 12  | 31  | 10  | 3  | 2  |
| MG | Santana do Deserto           | 3.985   | 17  | 6   | 17  | 6   | 2  | 1  |
| MG | Santana do Garambéu          | 2.494   | 11  | 4   | 11  | 4   | 1  | 1  |
| MG | Santana do Jacaré            | 4.847   | 21  | 8   | 20  | 7   | 2  | 1  |
| MG | Santana do Manhuaçu          | 8.660   | 37  | 13  | 36  | 12  | 4  | 2  |
| MG | Santana do Paraíso           | 36.048  | 154 | 54  | 148 | 47  | 14 | 5  |
| MG | Santana do Riacho            | 4.334   | 19  | 7   | 18  | 6   | 2  | 1  |
| MG | Santana dos Montes           | 3.753   | 16  | 6   | 16  | 5   | 2  | 1  |
| MG | Santa Rita de Caldas         | 8.900   | 38  | 14  | 37  | 12  | 4  | 2  |
| MG | Santa Rita de Jacutinga      | 4.843   | 21  | 8   | 20  | 7   | 2  | 1  |
| MG | Santa Rita de Minas          | 7.322   | 32  | 11  | 30  | 10  | 3  | 1  |
| MG | Santa Rita de Ibitipoca      | 3.380   | 15  | 5   | 14  | 5   | 2  | 1  |
| MG | Santa Rita do Itueto         | 5.426   | 24  | 8   | 23  | 7   | 3  | 1  |
| MG | Santa Rita do Sapucaí        | 44.226  | 189 | 66  | 181 | 57  | 17 | 6  |
| MG | Santa Rosa da Serra          | 3.364   | 15  | 5   | 14  | 5   | 2  | 1  |
| MG | Santa Vitória                | 19.997  | 86  | 30  | 82  | 26  | 8  | 3  |
| MG | Santo Antônio do Amparo      | 18.697  | 80  | 28  | 77  | 24  | 8  | 3  |
| MG | Santo Antônio do Aventureiro | 3.602   | 16  | 6   | 15  | 5   | 2  | 1  |
| MG | Santo Antônio do Gramma      | 3.861   | 17  | 6   | 16  | 5   | 2  | 1  |
| MG | Santo Antônio do Itambé      | 3.763   | 16  | 6   | 16  | 5   | 2  | 1  |
| MG | Santo Antônio do Jacinto     | 11.570  | 50  | 18  | 48  | 15  | 5  | 2  |
| MG | Santo Antônio do Monte       | 28.603  | 122 | 43  | 117 | 37  | 11 | 4  |
| MG | Santo Antônio do Retiro      | 7.316   | 32  | 11  | 30  | 10  | 3  | 1  |
| MG | Santo Antônio do Rio Abaixo  | 1.756   | 8   | 3   | 8   | 3   | 1  | 1  |
| MG | Santo Hipólito               | 3.044   | 13  | 5   | 13  | 4   | 2  | 1  |
| MG | Santos Dumont                | 46.357  | 198 | 69  | 190 | 60  | 18 | 7  |
| MG | São Bento Abade              | 5.411   | 24  | 8   | 23  | 7   | 3  | 1  |
| MG | São Brás do Suaçuí           | 3.770   | 17  | 6   | 16  | 5   | 2  | 1  |
| MG | São Domingos das Dores       | 5.672   | 25  | 9   | 24  | 8   | 3  | 1  |
| MG | São Domingos do Prata        | 17.296  | 74  | 26  | 71  | 23  | 7  | 3  |
| MG | São Félix de Minas           | 3.354   | 15  | 5   | 14  | 5   | 2  | 1  |
| MG | São Francisco                | 56.625  | 241 | 84  | 232 | 73  | 22 | 8  |
| MG | São Francisco de Paula       | 6.512   | 28  | 10  | 27  | 9   | 3  | 1  |
| MG | São Francisco de Sales       | 6.309   | 27  | 10  | 26  | 9   | 3  | 1  |
| MG | São Francisco do Glória      | 4.758   | 21  | 8   | 20  | 7   | 2  | 1  |
| MG | São Geraldo                  | 12.751  | 55  | 19  | 53  | 17  | 5  | 2  |
| MG | São Geraldo da Piedade       | 3.860   | 17  | 6   | 16  | 5   | 2  | 1  |
| MG | São Geraldo do Baixo         | 4.104   | 18  | 7   | 17  | 6   | 2  | 1  |
| MG | São Gonçalo do Abaeté        | 8.527   | 37  | 13  | 35  | 11  | 4  | 2  |
| MG | São Gonçalo do Pará          | 12.776  | 55  | 19  | 53  | 17  | 5  | 2  |
| MG | São Gonçalo do Rio Abaixo    | 11.114  | 48  | 17  | 46  | 15  | 5  | 2  |
| MG | São Gonçalo do Sapucaí       | 25.670  | 110 | 38  | 105 | 33  | 10 | 4  |
| MG | São Gotardo                  | 36.084  | 154 | 54  | 148 | 47  | 14 | 5  |

|    |                             |         |      |     |     |     |    |    |
|----|-----------------------------|---------|------|-----|-----|-----|----|----|
| MG | São João Batista do Glória  | 7.541   | 33   | 12  | 31  | 10  | 3  | 2  |
| MG | São João da Lagoa           | 4.949   | 22   | 8   | 21  | 7   | 2  | 1  |
| MG | São João da Mata            | 2.743   | 12   | 5   | 12  | 4   | 2  | 1  |
| MG | São João da Ponte           | 25.033  | 107  | 37  | 103 | 33  | 10 | 4  |
| MG | São João das Missões        | 13.232  | 57   | 20  | 55  | 17  | 5  | 2  |
| MG | São João del Rei            | 90.897  | 387  | 134 | 372 | 117 | 35 | 13 |
| MG | São João do Manhuaçu        | 11.785  | 51   | 18  | 49  | 16  | 5  | 2  |
| MG | São João do Manteninha      | 5.975   | 26   | 9   | 25  | 8   | 3  | 1  |
| MG | São João do Oriente         | 7.393   | 32   | 11  | 31  | 10  | 3  | 2  |
| MG | São João do Pacuí           | 4.476   | 20   | 7   | 19  | 6   | 2  | 1  |
| MG | São João do Paraíso         | 23.797  | 102  | 36  | 98  | 31  | 9  | 4  |
| MG | São João Evangelista        | 15.761  | 68   | 24  | 65  | 21  | 6  | 3  |
| MG | São João Nepomuceno         | 26.530  | 113  | 40  | 109 | 35  | 11 | 4  |
| MG | São Joaquim de Bicas        | 32.696  | 139  | 49  | 134 | 42  | 13 | 5  |
| MG | São José da Barra           | 7.532   | 33   | 12  | 31  | 10  | 3  | 2  |
| MG | São José da Lapa            | 24.490  | 105  | 37  | 101 | 32  | 10 | 4  |
| MG | São José da Safira          | 4.291   | 19   | 7   | 18  | 6   | 2  | 1  |
| MG | São José da Varginha        | 5.151   | 22   | 8   | 22  | 7   | 2  | 1  |
| MG | São José do Alegre          | 4.222   | 18   | 7   | 18  | 6   | 2  | 1  |
| MG | São José do Divino          | 3.851   | 17   | 6   | 16  | 5   | 2  | 1  |
| MG | São José do Goiabal         | 5.356   | 23   | 8   | 22  | 7   | 3  | 1  |
| MG | São José do Jacuri          | 6.409   | 28   | 10  | 27  | 9   | 3  | 1  |
| MG | São José do Mantimento      | 2.821   | 12   | 5   | 12  | 4   | 2  | 1  |
| MG | São Lourenço                | 46.539  | 198  | 69  | 191 | 60  | 18 | 7  |
| MG | São Miguel do Anta          | 6.949   | 30   | 11  | 29  | 9   | 3  | 1  |
| MG | São Pedro da União          | 4.563   | 20   | 7   | 19  | 6   | 2  | 1  |
| MG | São Pedro dos Ferros        | 7.634   | 33   | 12  | 32  | 10  | 3  | 2  |
| MG | São Pedro do Suaçuí         | 5.160   | 22   | 8   | 22  | 7   | 2  | 1  |
| MG | São Romão                   | 12.713  | 55   | 19  | 52  | 17  | 5  | 2  |
| MG | São Roque de Minas          | 7.100   | 31   | 11  | 29  | 10  | 3  | 1  |
| MG | São Sebastião da Bela Vista | 5.598   | 24   | 9   | 23  | 8   | 3  | 1  |
| MG | São Sebastião da Vargem A   | 3.039   | 13   | 5   | 13  | 4   | 2  | 1  |
| MG | São Sebastião do Anta       | 6.697   | 29   | 10  | 28  | 9   | 3  | 1  |
| MG | São Sebastião do Maranhão   | 9.884   | 43   | 15  | 41  | 13  | 4  | 2  |
| MG | São Sebastião do Oeste      | 6.948   | 30   | 11  | 29  | 9   | 3  | 1  |
| MG | São Sebastião do Paraíso    | 71.915  | 306  | 106 | 294 | 93  | 28 | 10 |
| MG | São Sebastião do Rio Preto  | 1.478   | 7    | 3   | 7   | 2   | 1  | 1  |
| MG | São Sebastião do Rio Verde  | 2.259   | 10   | 4   | 10  | 3   | 1  | 1  |
| MG | São Tiago                   | 10.979  | 47   | 17  | 45  | 15  | 5  | 2  |
| MG | São Tomás de Aquino         | 6.980   | 30   | 11  | 29  | 9   | 3  | 1  |
| MG | São Tomé das Letras         | 7.151   | 31   | 11  | 30  | 10  | 3  | 1  |
| MG | São Vicente de Minas        | 7.876   | 34   | 12  | 33  | 11  | 3  | 2  |
| MG | Sapucaí-Mirim               | 7.045   | 30   | 11  | 29  | 10  | 3  | 1  |
| MG | Sardoá                      | 6.421   | 28   | 10  | 27  | 9   | 3  | 1  |
| MG | Sarzedo                     | 34.050  | 145  | 51  | 140 | 44  | 13 | 5  |
| MG | Setubinha                   | 12.493  | 54   | 19  | 52  | 17  | 5  | 2  |
| MG | Sem-Peixe                   | 2.579   | 11   | 4   | 11  | 4   | 1  | 1  |
| MG | Senador Amaral              | 5.365   | 23   | 8   | 22  | 7   | 3  | 1  |
| MG | Senador Cortes              | 2.001   | 9    | 3   | 9   | 3   | 1  | 1  |
| MG | Senador Firmino             | 7.902   | 34   | 12  | 33  | 11  | 3  | 2  |
| MG | Senador José Bento          | 1.422   | 7    | 3   | 6   | 2   | 1  | 1  |
| MG | Senador Modestino Gonçalves | 4.056   | 18   | 6   | 17  | 6   | 2  | 1  |
| MG | Senhora de Oliveira         | 5.786   | 25   | 9   | 24  | 8   | 3  | 1  |
| MG | Senhora do Porto            | 3.516   | 15   | 6   | 15  | 5   | 2  | 1  |
| MG | Senhora dos Remédios        | 10.474  | 45   | 16  | 43  | 14  | 4  | 2  |
| MG | Sericita                    | 7.340   | 32   | 11  | 30  | 10  | 3  | 1  |
| MG | Seritinga                   | 1.857   | 8    | 3   | 8   | 3   | 1  | 1  |
| MG | Serra Azul de Minas         | 4.292   | 19   | 7   | 18  | 6   | 2  | 1  |
| MG | Serra da Saudade            | 771     | 4    | 2   | 4   | 1   | 1  | 1  |
| MG | Serra dos Aimorés           | 8.725   | 38   | 13  | 36  | 12  | 4  | 2  |
| MG | Serra do Salitre            | 11.750  | 50   | 18  | 48  | 16  | 5  | 2  |
| MG | Serrania                    | 7.667   | 33   | 12  | 32  | 10  | 3  | 2  |
| MG | Serranópolis de Minas       | 4.836   | 21   | 8   | 20  | 7   | 2  | 1  |
| MG | Serranos                    | 1.949   | 9    | 3   | 8   | 3   | 1  | 1  |
| MG | Serro                       | 20.915  | 89   | 31  | 86  | 27  | 8  | 3  |
| MG | Sete Lagoas                 | 243.950 | 1038 | 360 | 997 | 313 | 93 | 34 |

|    |                           |         |      |      |      |     |     |    |
|----|---------------------------|---------|------|------|------|-----|-----|----|
| MG | Silveirânia               | 2.267   | 10   | 4    | 10   | 3   | 1   | 1  |
| MG | Silvianópolis             | 6.258   | 27   | 10   | 26   | 9   | 3   | 1  |
| MG | Simão Pereira             | 2.621   | 12   | 4    | 11   | 4   | 1   | 1  |
| MG | Simonésia                 | 19.834  | 85   | 30   | 82   | 26  | 8   | 3  |
| MG | Sobralia                  | 5.476   | 24   | 9    | 23   | 8   | 3   | 1  |
| MG | Soledade de Minas         | 6.226   | 27   | 10   | 26   | 8   | 3   | 1  |
| MG | Tabuleiro                 | 3.669   | 16   | 6    | 15   | 5   | 2   | 1  |
| MG | Taiobeiras                | 34.653  | 148  | 52   | 142  | 45  | 14  | 5  |
| MG | Taparuba                  | 3.093   | 14   | 5    | 13   | 4   | 2   | 1  |
| MG | Tapira                    | 4.890   | 21   | 8    | 20   | 7   | 2   | 1  |
| MG | Tapiraí                   | 1.869   | 8    | 3    | 8    | 3   | 1   | 1  |
| MG | Taquaraçu de Minas        | 4.120   | 18   | 7    | 17   | 6   | 2   | 1  |
| MG | Tarumirim                 | 14.280  | 61   | 22   | 59   | 19  | 6   | 2  |
| MG | Teixeiras                 | 11.680  | 50   | 18   | 48   | 15  | 5   | 2  |
| MG | Teófilo Otoni             | 141.269 | 601  | 208  | 577  | 182 | 54  | 20 |
| MG | Timóteo                   | 91.268  | 388  | 135  | 373  | 118 | 35  | 13 |
| MG | Tiradentes                | 8.160   | 35   | 13   | 34   | 11  | 4   | 2  |
| MG | Tiros                     | 6.369   | 28   | 10   | 27   | 9   | 3   | 1  |
| MG | Tocantins                 | 16.769  | 72   | 25   | 69   | 22  | 7   | 3  |
| MG | Tocos do Moji             | 4.117   | 18   | 7    | 17   | 6   | 2   | 1  |
| MG | Toledo                    | 6.336   | 27   | 10   | 26   | 9   | 3   | 1  |
| MG | Tombos                    | 7.683   | 33   | 12   | 32   | 10  | 3   | 2  |
| MG | Três Corações             | 80.561  | 343  | 119  | 330  | 104 | 31  | 11 |
| MG | Três Marias               | 33.062  | 141  | 49   | 136  | 43  | 13  | 5  |
| MG | Três Pontas               | 57.127  | 243  | 85   | 234  | 74  | 22  | 8  |
| MG | Tumiritinga               | 6.797   | 29   | 11   | 28   | 9   | 3   | 1  |
| MG | Tupaciguara               | 25.466  | 109  | 38   | 105  | 33  | 10  | 4  |
| MG | Turmalina                 | 20.280  | 87   | 30   | 83   | 27  | 8   | 3  |
| MG | Turvolândia               | 5.099   | 22   | 8    | 21   | 7   | 2   | 1  |
| MG | Ubá                       | 117.995 | 502  | 174  | 482  | 152 | 45  | 16 |
| MG | Ubaí                      | 12.661  | 54   | 19   | 52   | 17  | 5   | 2  |
| MG | Ubaporanga                | 12.514  | 54   | 19   | 52   | 17  | 5   | 2  |
| MG | Uberaba                   | 340.277 | 1447 | 501  | 1390 | 437 | 129 | 47 |
| MG | Uberlândia                | 706.597 | 3004 | 1041 | 2886 | 907 | 267 | 96 |
| MG | Umburatiba                | 2.582   | 11   | 4    | 11   | 4   | 1   | 1  |
| MG | Unai                      | 85.461  | 364  | 126  | 350  | 110 | 33  | 12 |
| MG | União de Minas            | 4.265   | 19   | 7    | 18   | 6   | 2   | 1  |
| MG | Uruana de Minas           | 3.256   | 14   | 5    | 14   | 5   | 2   | 1  |
| MG | Urucânia                  | 10.333  | 44   | 16   | 43   | 14  | 4   | 2  |
| MG | Urucuia                   | 17.470  | 75   | 26   | 72   | 23  | 7   | 3  |
| MG | Vargem Alegre             | 6.460   | 28   | 10   | 27   | 9   | 3   | 1  |
| MG | Vargem Bonita             | 2.143   | 10   | 4    | 9    | 3   | 1   | 1  |
| MG | Vargem Grande do Rio Pard | 5.045   | 22   | 8    | 21   | 7   | 2   | 1  |
| MG | Varginha                  | 137.608 | 585  | 203  | 563  | 177 | 52  | 19 |
| MG | Varjão de Minas           | 7.235   | 31   | 11   | 30   | 10  | 3   | 1  |
| MG | Várzea da Palma           | 40.101  | 171  | 60   | 164  | 52  | 16  | 6  |
| MG | Varzelândia               | 19.290  | 83   | 29   | 79   | 25  | 8   | 3  |
| MG | Vazante                   | 20.692  | 88   | 31   | 85   | 27  | 8   | 3  |
| MG | Verdelândia               | 9.527   | 41   | 15   | 39   | 13  | 4   | 2  |
| MG | Veredinha                 | 5.733   | 25   | 9    | 24   | 8   | 3   | 1  |
| MG | Veríssimo                 | 4.090   | 18   | 7    | 17   | 6   | 2   | 1  |
| MG | Vermelho Novo             | 4.852   | 21   | 8    | 20   | 7   | 2   | 1  |
| MG | Vespasiano                | 131.849 | 561  | 195  | 539  | 170 | 50  | 18 |
| MG | Viçosa                    | 79.910  | 340  | 118  | 327  | 103 | 31  | 11 |
| MG | Vieiras                   | 3.570   | 16   | 6    | 15   | 5   | 2   | 1  |
| MG | Mathias Lobato            | 3.157   | 14   | 5    | 13   | 5   | 2   | 1  |
| MG | Virgem da Lapa            | 13.729  | 59   | 21   | 57   | 18  | 6   | 2  |
| MG | Virgínia                  | 8.652   | 37   | 13   | 36   | 12  | 4   | 2  |
| MG | Virginópolis              | 10.459  | 45   | 16   | 43   | 14  | 4   | 2  |
| MG | Virgolândia               | 5.303   | 23   | 8    | 22   | 7   | 3   | 1  |
| MG | Visconde do Rio Branco    | 43.351  | 185  | 64   | 178  | 56  | 17  | 6  |
| MG | Volta Grande              | 5.270   | 23   | 8    | 22   | 7   | 2   | 1  |
| MG | Wenceslau Braz            | 2.543   | 11   | 4    | 11   | 4   | 1   | 1  |
| ES | Afonso Cláudio            | 30.326  | 126  | 44   | 121  | 38  | 12  | 4  |
| ES | Águia Branca              | 9.621   | 40   | 14   | 39   | 12  | 4   | 2  |
| ES | Água Doce do Norte        | 10.801  | 45   | 16   | 43   | 14  | 4   | 2  |

|    |                         |         |      |     |      |     |     |    |
|----|-------------------------|---------|------|-----|------|-----|-----|----|
| ES | Alegre                  | 29.869  | 124  | 43  | 119  | 38  | 11  | 4  |
| ES | Alfredo Chaves          | 14.670  | 61   | 21  | 59   | 19  | 6   | 2  |
| ES | Alto Rio Novo           | 7.911   | 33   | 12  | 32   | 10  | 3   | 2  |
| ES | Anchieta                | 30.285  | 125  | 44  | 120  | 38  | 12  | 4  |
| ES | Apiacá                  | 7.542   | 32   | 11  | 30   | 10  | 3   | 1  |
| ES | Aracruz                 | 104.942 | 433  | 150 | 416  | 131 | 39  | 14 |
| ES | Atílio Vivácqua         | 12.270  | 51   | 18  | 49   | 16  | 5   | 2  |
| ES | Baixo Guandu            | 31.263  | 129  | 45  | 124  | 39  | 12  | 5  |
| ES | Barra de São Francisco  | 45.301  | 187  | 65  | 180  | 57  | 17  | 6  |
| ES | Boa Esperança           | 15.146  | 63   | 22  | 60   | 19  | 6   | 2  |
| ES | Bom Jesus do Norte      | 9.988   | 42   | 15  | 40   | 13  | 4   | 2  |
| ES | Brejetuba               | 12.450  | 52   | 18  | 50   | 16  | 5   | 2  |
| ES | Cachoeiro de Itapemirim | 212.172 | 875  | 303 | 841  | 264 | 78  | 28 |
| ES | Cariacica               | 386.495 | 1594 | 552 | 1532 | 481 | 142 | 51 |
| ES | Castelo                 | 37.956  | 157  | 55  | 151  | 48  | 14  | 5  |
| ES | Colatina                | 124.283 | 513  | 178 | 493  | 155 | 46  | 17 |
| ES | Conceição da Barra      | 31.479  | 130  | 45  | 125  | 40  | 12  | 5  |
| ES | Conceição do Castelo    | 12.887  | 54   | 19  | 52   | 17  | 5   | 2  |
| ES | Divino de São Lourenço  | 4.236   | 18   | 7   | 17   | 6   | 2   | 1  |
| ES | Domingos Martins        | 34.120  | 141  | 49  | 136  | 43  | 13  | 5  |
| ES | Dores do Rio Preto      | 6.793   | 29   | 10  | 27   | 9   | 3   | 1  |
| ES | Ecoporanga              | 22.748  | 94   | 33  | 91   | 29  | 9   | 3  |
| ES | Fundão                  | 22.379  | 93   | 32  | 89   | 28  | 9   | 3  |
| ES | Governador Lindenberg   | 13.047  | 54   | 19  | 52   | 17  | 5   | 2  |
| ES | Guaçuí                  | 31.372  | 130  | 45  | 125  | 40  | 12  | 5  |
| ES | Guarapari               | 128.504 | 530  | 184 | 510  | 160 | 48  | 17 |
| ES | Ibatiba                 | 26.762  | 111  | 39  | 107  | 34  | 10  | 4  |
| ES | Ibiraçu                 | 12.701  | 53   | 19  | 51   | 16  | 5   | 2  |
| ES | Ibitirama               | 8.830   | 37   | 13  | 35   | 11  | 4   | 2  |
| ES | Iconha                  | 14.083  | 59   | 21  | 56   | 18  | 6   | 2  |
| ES | Irupi                   | 13.672  | 57   | 20  | 55   | 18  | 6   | 2  |
| ES | Itaguaçu                | 13.982  | 58   | 20  | 56   | 18  | 6   | 2  |
| ES | Itapemirim              | 34.957  | 145  | 50  | 139  | 44  | 13  | 5  |
| ES | Itarana                 | 10.433  | 44   | 15  | 42   | 13  | 4   | 2  |
| ES | Lúna                    | 29.417  | 122  | 42  | 117  | 37  | 11  | 4  |
| ES | Jaguaré                 | 31.589  | 131  | 46  | 126  | 40  | 12  | 5  |
| ES | Jerônimo Monteiro       | 12.336  | 51   | 18  | 49   | 16  | 5   | 2  |
| ES | João Neiva              | 16.774  | 70   | 24  | 67   | 21  | 7   | 3  |
| ES | Laranja da Terra        | 10.919  | 46   | 16  | 44   | 14  | 4   | 2  |
| ES | Linhares                | 179.755 | 742  | 257 | 713  | 224 | 66  | 24 |
| ES | Mantenópolis            | 15.653  | 65   | 23  | 63   | 20  | 6   | 3  |
| ES | Marataízes              | 39.259  | 162  | 57  | 156  | 49  | 15  | 6  |
| ES | Marechal Floriano       | 17.141  | 71   | 25  | 68   | 22  | 7   | 3  |
| ES | Mariândia               | 13.091  | 54   | 19  | 52   | 17  | 5   | 2  |
| ES | Mimoso do Sul           | 26.079  | 108  | 38  | 104  | 33  | 10  | 4  |
| ES | Montanha                | 18.954  | 79   | 28  | 76   | 24  | 7   | 3  |
| ES | Mucurici                | 5.468   | 23   | 8   | 22   | 7   | 3   | 1  |
| ES | Muniz Freire            | 17.176  | 71   | 25  | 69   | 22  | 7   | 3  |
| ES | Muqui                   | 15.602  | 65   | 23  | 62   | 20  | 6   | 3  |
| ES | Nova Venécia            | 50.751  | 210  | 73  | 202  | 64  | 19  | 7  |
| ES | Pancas                  | 23.426  | 97   | 34  | 93   | 30  | 9   | 4  |
| ES | Pedro Canário           | 26.575  | 110  | 38  | 106  | 34  | 10  | 4  |
| ES | Pinheiros               | 27.601  | 114  | 40  | 110  | 35  | 11  | 4  |
| ES | Piúma                   | 22.388  | 93   | 32  | 89   | 28  | 9   | 3  |
| ES | Ponto Belo              | 8.016   | 34   | 12  | 32   | 10  | 3   | 2  |
| ES | Presidente Kennedy      | 11.741  | 49   | 17  | 47   | 15  | 5   | 2  |
| ES | Rio Bananal             | 19.398  | 80   | 28  | 77   | 25  | 8   | 3  |
| ES | Rio Novo do Sul         | 11.630  | 48   | 17  | 47   | 15  | 5   | 2  |
| ES | Santa Leopoldina        | 12.171  | 51   | 18  | 49   | 16  | 5   | 2  |
| ES | Santa Maria de Jetibá   | 41.588  | 172  | 60  | 165  | 52  | 16  | 6  |
| ES | Santa Teresa            | 23.853  | 99   | 35  | 95   | 30  | 9   | 4  |
| ES | São Domingos do Norte   | 8.735   | 37   | 13  | 35   | 11  | 4   | 2  |
| ES | São Gabriel da Palha    | 39.085  | 162  | 56  | 155  | 49  | 15  | 6  |
| ES | São José do Calçado     | 10.536  | 44   | 16  | 42   | 14  | 4   | 2  |
| ES | São Mateus              | 134.629 | 556  | 193 | 534  | 168 | 50  | 18 |
| ES | São Roque do Canaã      | 12.602  | 52   | 18  | 50   | 16  | 5   | 2  |



|    |                             |         |      |      |      |      |     |     |
|----|-----------------------------|---------|------|------|------|------|-----|-----|
| ES | Serra                       | 536.765 | 2214 | 767  | 2127 | 668  | 197 | 71  |
| ES | Sooretama                   | 31.278  | 129  | 45   | 124  | 39   | 12  | 5   |
| ES | Vargem Alta                 | 21.778  | 90   | 32   | 87   | 28   | 8   | 3   |
| ES | Venda Nova do Imigrante     | 26.204  | 109  | 38   | 104  | 33   | 10  | 4   |
| ES | Viana                       | 80.735  | 333  | 116  | 320  | 101  | 30  | 11  |
| ES | Vila Pavão                  | 9.280   | 39   | 14   | 37   | 12   | 4   | 2   |
| ES | Vila Valério                | 14.065  | 58   | 21   | 56   | 18   | 6   | 2   |
| ES | Vila Velha                  | 508.655 | 2098 | 727  | 2015 | 633  | 187 | 67  |
| ES | Vitória                     | 369.534 | 1524 | 528  | 1464 | 460  | 136 | 49  |
| RJ | Angra dos Reis              | 210.171 | 896  | 311  | 861  | 271  | 80  | 29  |
| RJ | Aperibé                     | 12.036  | 52   | 18   | 50   | 16   | 5   | 2   |
| RJ | Araruama                    | 136.109 | 581  | 201  | 558  | 176  | 52  | 19  |
| RJ | Areal                       | 12.763  | 55   | 19   | 53   | 17   | 5   | 2   |
| RJ | Armação dos Búzios          | 35.060  | 150  | 52   | 144  | 46   | 14  | 5   |
| RJ | Arraial do Cabo             | 30.827  | 132  | 46   | 127  | 40   | 12  | 5   |
| RJ | Barra do Pirai              | 101.139 | 432  | 150  | 415  | 131  | 39  | 14  |
| RJ | Barra Mansa                 | 185.237 | 790  | 274  | 759  | 239  | 71  | 26  |
| RJ | Belford Roxo                | 515.239 | 2197 | 761  | 2111 | 663  | 196 | 71  |
| RJ | Bom Jardim                  | 27.779  | 119  | 41   | 114  | 36   | 11  | 4   |
| RJ | Bom Jesus do Itabapoana     | 37.306  | 160  | 56   | 153  | 48   | 15  | 6   |
| RJ | Cabo Frio                   | 234.077 | 998  | 346  | 959  | 302  | 89  | 32  |
| RJ | Cachoeiras de Macacu        | 59.652  | 255  | 89   | 245  | 77   | 23  | 9   |
| RJ | Cambuci                     | 15.521  | 67   | 23   | 64   | 20   | 6   | 3   |
| RJ | Carapebus                   | 16.859  | 72   | 25   | 70   | 22   | 7   | 3   |
| RJ | Comendador Levy Gasparina   | 8.590   | 37   | 13   | 36   | 12   | 4   | 2   |
| RJ | Campos dos Goytacazes       | 514.643 | 2194 | 760  | 2108 | 662  | 195 | 70  |
| RJ | Cantagalo                   | 20.163  | 86   | 30   | 83   | 26   | 8   | 3   |
| RJ | Cardoso Moreira             | 12.818  | 55   | 19   | 53   | 17   | 5   | 2   |
| RJ | Carmo                       | 19.161  | 82   | 29   | 79   | 25   | 8   | 3   |
| RJ | Casimiro de Abreu           | 45.864  | 196  | 68   | 188  | 59   | 18  | 7   |
| RJ | Conceição de Macabu         | 23.561  | 101  | 35   | 97   | 31   | 9   | 4   |
| RJ | Cordeiro                    | 22.152  | 95   | 33   | 91   | 29   | 9   | 4   |
| RJ | Duas Barras                 | 11.563  | 50   | 18   | 48   | 15   | 5   | 2   |
| RJ | Duque de Caxias             | 929.449 | 3962 | 1372 | 3807 | 1196 | 353 | 127 |
| RJ | Engenheiro Paulo de Frontin | 14.138  | 61   | 21   | 58   | 19   | 6   | 2   |
| RJ | Guapimirim                  | 62.225  | 266  | 92   | 255  | 81   | 24  | 9   |
| RJ | Iguaba Grande               | 29.344  | 126  | 44   | 121  | 38   | 12  | 4   |
| RJ | Itaboraí                    | 244.416 | 1042 | 361  | 1001 | 315  | 93  | 34  |
| RJ | Itaguaí                     | 136.547 | 583  | 202  | 560  | 176  | 52  | 19  |
| RJ | Italva                      | 15.387  | 66   | 23   | 64   | 20   | 6   | 3   |
| RJ | Itaocara                    | 23.211  | 99   | 35   | 96   | 30   | 9   | 4   |
| RJ | Itaperuna                   | 104.354 | 445  | 155  | 428  | 135  | 40  | 15  |
| RJ | Itatiaia                    | 32.312  | 138  | 48   | 133  | 42   | 13  | 5   |
| RJ | Japeri                      | 106.296 | 454  | 157  | 436  | 137  | 41  | 15  |
| RJ | Laje do Muriaé              | 7.298   | 32   | 11   | 30   | 10   | 3   | 1   |
| RJ | Macaé                       | 266.136 | 1135 | 393  | 1090 | 343  | 101 | 37  |
| RJ | Macuco                      | 5.646   | 25   | 9    | 24   | 8    | 3   | 1   |
| RJ | Magé                        | 247.741 | 1057 | 366  | 1015 | 319  | 94  | 34  |
| RJ | Mangaratiba                 | 45.941  | 196  | 68   | 189  | 60   | 18  | 7   |
| RJ | Maricá                      | 167.668 | 715  | 248  | 687  | 216  | 64  | 23  |
| RJ | Mendes                      | 18.681  | 80   | 28   | 77   | 25   | 8   | 3   |
| RJ | Mesquita                    | 177.016 | 755  | 262  | 725  | 228  | 68  | 25  |
| RJ | Miguel Pereira              | 25.622  | 110  | 38   | 105  | 33   | 10  | 4   |
| RJ | Miracema                    | 27.134  | 116  | 41   | 112  | 35   | 11  | 4   |
| RJ | Natividade                  | 15.305  | 66   | 23   | 63   | 20   | 6   | 3   |
| RJ | Nilópolis                   | 162.893 | 695  | 241  | 668  | 210  | 62  | 23  |
| RJ | Niterói                     | 516.981 | 2204 | 764  | 2118 | 665  | 196 | 71  |
| RJ | Nova Friburgo               | 191.664 | 817  | 283  | 785  | 247  | 73  | 27  |
| RJ | Nova Iguaçu                 | 825.388 | 3519 | 1219 | 3381 | 1062 | 313 | 113 |
| RJ | Paracambi                   | 53.093  | 227  | 79   | 218  | 69   | 21  | 8   |
| RJ | Paraíba do Sul              | 44.741  | 191  | 67   | 184  | 58   | 17  | 7   |
| RJ | Paraty                      | 44.175  | 189  | 66   | 181  | 57   | 17  | 7   |
| RJ | Paty do Alferes             | 27.942  | 120  | 42   | 115  | 36   | 11  | 4   |
| RJ | Petrópolis                  | 307.144 | 1310 | 454  | 1258 | 396  | 117 | 42  |
| RJ | Pinheiral                   | 25.563  | 109  | 38   | 105  | 33   | 10  | 4   |
| RJ | Pirai                       | 29.802  | 128  | 44   | 123  | 39   | 12  | 5   |

|    |                               |           |       |       |       |      |      |     |
|----|-------------------------------|-----------|-------|-------|-------|------|------|-----|
| RJ | Porciúncula                   | 19.068    | 82    | 29    | 79    | 25   | 8    | 3   |
| RJ | Porto Real                    | 20.254    | 87    | 30    | 83    | 27   | 8    | 3   |
| RJ | Quatis                        | 14.562    | 63    | 22    | 60    | 19   | 6    | 2   |
| RJ | Queimados                     | 152.311   | 650   | 225   | 624   | 196  | 58   | 21  |
| RJ | Quissamã                      | 25.535    | 109   | 38    | 105   | 33   | 10   | 4   |
| RJ | Resende                       | 133.244   | 568   | 197   | 546   | 172  | 51   | 19  |
| RJ | Rio Bonito                    | 60.930    | 260   | 90    | 250   | 79   | 24   | 9   |
| RJ | Rio Claro                     | 18.677    | 80    | 28    | 77    | 25   | 8    | 3   |
| RJ | Rio das Flores                | 9.401     | 41    | 14    | 39    | 13   | 4    | 2   |
| RJ | Rio das Ostras                | 159.529   | 681   | 236   | 654   | 206  | 61   | 22  |
| RJ | Rio de Janeiro                | 6.775.561 | 28882 | 10000 | 27749 | 8714 | 2567 | 922 |
| RJ | Santa Maria Madalena          | 10.380    | 45    | 16    | 43    | 14   | 4    | 2   |
| RJ | Santo Antônio de Pádua        | 42.705    | 183   | 64    | 175   | 55   | 17   | 6   |
| RJ | São Francisco de Itabapoara   | 42.214    | 180   | 63    | 173   | 55   | 16   | 6   |
| RJ | São Fidélis                   | 38.749    | 166   | 58    | 159   | 50   | 15   | 6   |
| RJ | São Gonçalo                   | 1.098.357 | 4682  | 1622  | 4499  | 1413 | 416  | 150 |
| RJ | São João da Barra             | 36.731    | 157   | 55    | 151   | 48   | 14   | 5   |
| RJ | São João de Meriti            | 473.385   | 2018  | 699   | 1939  | 609  | 180  | 65  |
| RJ | São José de Ubá               | 7.240     | 31    | 11    | 30    | 10   | 3    | 1   |
| RJ | São José do Vale do Rio Preto | 22.032    | 94    | 33    | 91    | 29   | 9    | 3   |
| RJ | São Pedro da Aldeia           | 107.556   | 459   | 159   | 441   | 139  | 41   | 15  |
| RJ | São Sebastião do Alto         | 9.416     | 41    | 14    | 39    | 13   | 4    | 2   |
| RJ | Sapucaia                      | 18.270    | 78    | 27    | 75    | 24   | 7    | 3   |
| RJ | Saquarema                     | 91.938    | 392   | 136   | 377   | 119  | 35   | 13  |
| RJ | Seropédica                    | 83.841    | 358   | 124   | 344   | 108  | 32   | 12  |
| RJ | Silva Jardim                  | 21.775    | 93    | 33    | 90    | 29   | 9    | 3   |
| RJ | Sumidouro                     | 15.709    | 67    | 24    | 65    | 21   | 6    | 3   |
| RJ | Tanguá                        | 34.898    | 149   | 52    | 143   | 45   | 14   | 5   |
| RJ | Teresópolis                   | 185.820   | 793   | 275   | 762   | 239  | 71   | 26  |
| RJ | Trajano de Moraes             | 10.653    | 46    | 16    | 44    | 14   | 5    | 2   |
| RJ | Três Rios                     | 82.468    | 352   | 122   | 338   | 107  | 32   | 12  |
| RJ | Valença                       | 77.202    | 330   | 114   | 317   | 100  | 30   | 11  |
| RJ | Varre-Sai                     | 11.208    | 48    | 17    | 46    | 15   | 5    | 2   |
| RJ | Vassouras                     | 37.262    | 159   | 55    | 153   | 48   | 15   | 6   |
| RJ | Volta Redonda                 | 274.925   | 1172  | 406   | 1126  | 354  | 105  | 38  |
| SP | Adamantina                    | 35.153    | 149   | 52    | 143   | 45   | 14   | 5   |
| SP | Adolfo                        | 3.545     | 15    | 6     | 15    | 5    | 2    | 1   |
| SP | Aguai                         | 36.981    | 157   | 55    | 150   | 48   | 14   | 5   |
| SP | Águas da Prata                | 8.262     | 35    | 13    | 34    | 11   | 4    | 2   |
| SP | Águas de Lindóia              | 18.908    | 80    | 28    | 77    | 25   | 8    | 3   |
| SP | Águas de Santa Bárbara        | 6.142     | 26    | 9     | 25    | 8    | 3    | 1   |
| SP | Águas de São Pedro            | 3.588     | 16    | 6     | 15    | 5    | 2    | 1   |
| SP | Agudos                        | 37.582    | 159   | 55    | 153   | 48   | 15   | 6   |
| SP | Alambari                      | 6.231     | 27    | 10    | 26    | 8    | 3    | 1   |
| SP | Alfredo Marcondes             | 4.201     | 18    | 7     | 18    | 6    | 2    | 1   |
| SP | Altair                        | 4.211     | 18    | 7     | 18    | 6    | 2    | 1   |
| SP | Altinópolis                   | 16.221    | 69    | 24    | 66    | 21   | 7    | 3   |
| SP | Alto Alegre                   | 4.078     | 18    | 6     | 17    | 6    | 2    | 1   |
| SP | Alumínio                      | 18.903    | 80    | 28    | 77    | 25   | 8    | 3   |
| SP | Álvares Florence              | 3.616     | 16    | 6     | 15    | 5    | 2    | 1   |
| SP | Álvares Machado               | 25.078    | 106   | 37    | 102   | 32   | 10   | 4   |
| SP | Álvaro de Carvalho            | 5.320     | 23    | 8     | 22    | 7    | 2    | 1   |
| SP | Alvinlândia                   | 3.251     | 14    | 5     | 14    | 5    | 2    | 1   |
| SP | Americana                     | 244.370   | 1031  | 357   | 991   | 312  | 92   | 33  |
| SP | Américo Brasiliense           | 41.545    | 176   | 61    | 169   | 53   | 16   | 6   |
| SP | Américo de Campos             | 5.993     | 26    | 9     | 25    | 8    | 3    | 1   |
| SP | Amparo                        | 73.145    | 309   | 107   | 297   | 94   | 28   | 10  |
| SP | Analândia                     | 5.115     | 22    | 8     | 21    | 7    | 2    | 1   |
| SP | Andradina                     | 57.245    | 242   | 84    | 233   | 73   | 22   | 8   |
| SP | Angatuba                      | 25.724    | 109   | 38    | 105   | 33   | 10   | 4   |
| SP | Anhembi                       | 6.911     | 30    | 11    | 29    | 9    | 3    | 1   |
| SP | Anhumas                       | 4.172     | 18    | 7     | 17    | 6    | 2    | 1   |
| SP | Aparecida                     | 36.211    | 153   | 53    | 147   | 47   | 14   | 5   |
| SP | Aparecida d'Oeste             | 4.122     | 18    | 7     | 17    | 6    | 2    | 1   |
| SP | Apiáí                         | 24.081    | 102   | 36    | 98    | 31   | 10   | 4   |
| SP | Araçariguama                  | 23.343    | 99    | 35    | 95    | 30   | 9    | 4   |

|    |                        |         |      |     |      |     |     |    |
|----|------------------------|---------|------|-----|------|-----|-----|----|
| SP | Araçatuba              | 199.210 | 841  | 291 | 808  | 254 | 75  | 27 |
| SP | Araçoiaba da Serra     | 35.389  | 150  | 52  | 144  | 46  | 14  | 5  |
| SP | Aramina                | 5.689   | 25   | 9   | 24   | 8   | 3   | 1  |
| SP | Arandu                 | 6.373   | 27   | 10  | 26   | 9   | 3   | 1  |
| SP | Arapeí                 | 2.452   | 11   | 4   | 10   | 4   | 1   | 1  |
| SP | Araraquara             | 240.542 | 1015 | 352 | 975  | 307 | 91  | 33 |
| SP | Araras                 | 136.739 | 577  | 200 | 555  | 175 | 52  | 19 |
| SP | Arco-Íris              | 1.755   | 8    | 3   | 8    | 3   | 1   | 1  |
| SP | Arealva                | 8.665   | 37   | 13  | 36   | 12  | 4   | 2  |
| SP | Areias                 | 3.906   | 17   | 6   | 16   | 5   | 2   | 1  |
| SP | Areiópolis             | 11.186  | 48   | 17  | 46   | 15  | 5   | 2  |
| SP | Ariranha               | 9.851   | 42   | 15  | 40   | 13  | 4   | 2  |
| SP | Artur Nogueira         | 56.247  | 238  | 83  | 228  | 72  | 22  | 8  |
| SP | Arujá                  | 92.453  | 391  | 136 | 375  | 118 | 35  | 13 |
| SP | Aspásia                | 1.815   | 8    | 3   | 8    | 3   | 1   | 1  |
| SP | Assis                  | 105.768 | 447  | 155 | 429  | 135 | 40  | 15 |
| SP | Atibaia                | 145.378 | 614  | 213 | 590  | 186 | 55  | 20 |
| SP | Auriflâma              | 15.316  | 65   | 23  | 63   | 20  | 6   | 3  |
| SP | Avai                   | 5.467   | 24   | 8   | 23   | 7   | 3   | 1  |
| SP | Avanhandava            | 14.063  | 60   | 21  | 57   | 18  | 6   | 2  |
| SP | Avaré                  | 91.792  | 388  | 135 | 373  | 117 | 35  | 13 |
| SP | Bady Bassitt           | 18.013  | 76   | 27  | 74   | 23  | 7   | 3  |
| SP | Balbinos               | 6.127   | 26   | 9   | 25   | 8   | 3   | 1  |
| SP | Bálsamo                | 9.209   | 39   | 14  | 38   | 12  | 4   | 2  |
| SP | Bananal                | 11.039  | 47   | 17  | 45   | 15  | 5   | 2  |
| SP | Barão de Antonina      | 3.525   | 15   | 6   | 15   | 5   | 2   | 1  |
| SP | Barbosa                | 7.532   | 32   | 12  | 31   | 10  | 3   | 2  |
| SP | Bariri                 | 35.844  | 152  | 53  | 146  | 46  | 14  | 5  |
| SP | Barra Bonita           | 36.125  | 153  | 53  | 147  | 46  | 14  | 5  |
| SP | Barra do Chapéu        | 5.794   | 25   | 9   | 24   | 8   | 3   | 1  |
| SP | Barra do Turvo         | 7.606   | 33   | 12  | 31   | 10  | 3   | 2  |
| SP | Barretos               | 123.546 | 522  | 181 | 501  | 158 | 47  | 17 |
| SP | Barrinha               | 33.537  | 142  | 49  | 136  | 43  | 13  | 5  |
| SP | Barueri                | 279.704 | 1180 | 409 | 1134 | 357 | 105 | 38 |
| SP | Bastos                 | 20.952  | 89   | 31  | 85   | 27  | 8   | 3  |
| SP | Batatais               | 63.438  | 268  | 93  | 258  | 81  | 24  | 9  |
| SP | Bauru                  | 381.706 | 1611 | 558 | 1548 | 486 | 144 | 52 |
| SP | Bebedouro              | 77.612  | 328  | 114 | 315  | 99  | 30  | 11 |
| SP | Bento de Abreu         | 3.028   | 13   | 5   | 13   | 4   | 2   | 1  |
| SP | Bernardino de Campos   | 11.168  | 48   | 17  | 46   | 15  | 5   | 2  |
| SP | Bertioga               | 66.154  | 280  | 97  | 269  | 85  | 25  | 9  |
| SP | Bilac                  | 8.197   | 35   | 12  | 34   | 11  | 4   | 2  |
| SP | Birigui                | 126.094 | 532  | 185 | 512  | 161 | 48  | 17 |
| SP | Biritiba Mirim         | 33.265  | 141  | 49  | 135  | 43  | 13  | 5  |
| SP | Boa Esperança do Sul   | 15.111  | 64   | 23  | 62   | 20  | 6   | 3  |
| SP | Bocaina                | 12.571  | 54   | 19  | 51   | 17  | 5   | 2  |
| SP | Bofete                 | 12.107  | 52   | 18  | 50   | 16  | 5   | 2  |
| SP | Boituva                | 63.310  | 268  | 93  | 257  | 81  | 24  | 9  |
| SP | Bom Jesus dos Perdões  | 26.506  | 112  | 39  | 108  | 34  | 10  | 4  |
| SP | Bom Sucesso de Itararé | 4.013   | 17   | 6   | 17   | 6   | 2   | 1  |
| SP | Borá                   | 839     | 4    | 2   | 4    | 2   | 1   | 1  |
| SP | Boracéia               | 4.913   | 21   | 8   | 20   | 7   | 2   | 1  |
| SP | Borborema              | 16.278  | 69   | 24  | 66   | 21  | 7   | 3  |
| SP | Borebi                 | 2.713   | 12   | 4   | 11   | 4   | 2   | 1  |
| SP | Botucatu               | 149.718 | 632  | 219 | 607  | 191 | 57  | 21 |
| SP | Bragança Paulista      | 172.346 | 728  | 252 | 699  | 220 | 65  | 24 |
| SP | Braúna                 | 5.795   | 25   | 9   | 24   | 8   | 3   | 1  |
| SP | Brejo Alegre           | 2.911   | 13   | 5   | 12   | 4   | 2   | 1  |
| SP | Brodowski              | 25.605  | 109  | 38  | 104  | 33  | 10  | 4  |
| SP | Brotas                 | 24.862  | 105  | 37  | 101  | 32  | 10  | 4  |
| SP | Buri                   | 20.050  | 85   | 30  | 82   | 26  | 8   | 3  |
| SP | Buritama               | 17.414  | 74   | 26  | 71   | 23  | 7   | 3  |
| SP | Buritizal              | 4.547   | 20   | 7   | 19   | 6   | 2   | 1  |
| SP | Cabrália Paulista      | 4.222   | 18   | 7   | 18   | 6   | 2   | 1  |
| SP | Cabreúva               | 51.130  | 216  | 75  | 208  | 66  | 20  | 7  |
| SP | Caçapava               | 95.752  | 404  | 140 | 389  | 122 | 36  | 13 |

|    |                         |           |      |      |      |      |     |     |
|----|-------------------------|-----------|------|------|------|------|-----|-----|
| SP | Cachoeira Paulista      | 33.827    | 143  | 50   | 138  | 44   | 13  | 5   |
| SP | Caconde                 | 19.031    | 81   | 28   | 78   | 25   | 8   | 3   |
| SP | Cafelândia              | 17.917    | 76   | 27   | 73   | 23   | 7   | 3   |
| SP | Caiabu                  | 4.195     | 18   | 7    | 18   | 6    | 2   | 1   |
| SP | Caieiras                | 104.044   | 439  | 152  | 422  | 133  | 39  | 14  |
| SP | Caiuá                   | 6.017     | 26   | 9    | 25   | 8    | 3   | 1   |
| SP | Cajamar                 | 79.034    | 334  | 116  | 321  | 101  | 30  | 11  |
| SP | Cajati                  | 28.441    | 120  | 42   | 116  | 37   | 11  | 4   |
| SP | Cajobi                  | 10.649    | 45   | 16   | 44   | 14   | 4   | 2   |
| SP | Cajuru                  | 26.613    | 113  | 39   | 108  | 34   | 10  | 4   |
| SP | Campina do Monte Alegre | 6.088     | 26   | 9    | 25   | 8    | 3   | 1   |
| SP | Campinas                | 1.223.237 | 5161 | 1787 | 4958 | 1557 | 459 | 165 |
| SP | Campo Limpo Paulista    | 86.407    | 365  | 127  | 351  | 110  | 33  | 12  |
| SP | Campos do Jordão        | 52.713    | 223  | 77   | 214  | 68   | 20  | 8   |
| SP | Campos Novos Paulista   | 5.028     | 22   | 8    | 21   | 7    | 2   | 1   |
| SP | Cananéia                | 12.542    | 53   | 19   | 51   | 16   | 5   | 2   |
| SP | Canas                   | 5.268     | 23   | 8    | 22   | 7    | 2   | 1   |
| SP | Cândido Mota            | 31.410    | 133  | 46   | 128  | 40   | 12  | 5   |
| SP | Cândido Rodrigues       | 2.805     | 12   | 5    | 12   | 4    | 2   | 1   |
| SP | Canitar                 | 5.365     | 23   | 8    | 22   | 7    | 3   | 1   |
| SP | Capão Bonito            | 47.098    | 199  | 69   | 191  | 60   | 18  | 7   |
| SP | Capela do Alto          | 21.257    | 90   | 32   | 87   | 28   | 8   | 3   |
| SP | Capivari                | 56.973    | 241  | 84   | 231  | 73   | 22  | 8   |
| SP | Caraguatatuba           | 125.194   | 529  | 183  | 508  | 160  | 47  | 17  |
| SP | Carapicuíba             | 405.375   | 1711 | 593  | 1644 | 516  | 152 | 55  |
| SP | Cardoso                 | 12.371    | 53   | 19   | 51   | 16   | 5   | 2   |
| SP | Casa Branca             | 30.655    | 130  | 45   | 125  | 40   | 12  | 5   |
| SP | Cássia dos Coqueiros    | 2.488     | 11   | 4    | 11   | 4    | 1   | 1   |
| SP | Castilho                | 21.521    | 91   | 32   | 88   | 28   | 9   | 3   |
| SP | Catanduva               | 123.114   | 520  | 180  | 500  | 157  | 47  | 17  |
| SP | Catiguá                 | 7.905     | 34   | 12   | 33   | 11   | 3   | 2   |
| SP | Cedral                  | 9.452     | 40   | 14   | 39   | 13   | 4   | 2   |
| SP | Cerqueira César         | 20.391    | 87   | 30   | 83   | 26   | 8   | 3   |
| SP | Cerquilha               | 50.631    | 214  | 74   | 206  | 65   | 19  | 7   |
| SP | Cesário Lange           | 18.595    | 79   | 28   | 76   | 24   | 7   | 3   |
| SP | Charqueada              | 17.539    | 74   | 26   | 72   | 23   | 7   | 3   |
| SP | Clementina              | 8.894     | 38   | 13   | 37   | 12   | 4   | 2   |
| SP | Colina                  | 18.601    | 79   | 28   | 76   | 24   | 7   | 3   |
| SP | Colômbia                | 6.223     | 27   | 10   | 26   | 8    | 3   | 1   |
| SP | Conchal                 | 28.491    | 121  | 42   | 116  | 37   | 11  | 4   |
| SP | Conchas                 | 18.138    | 77   | 27   | 74   | 24   | 7   | 3   |
| SP | Cordeirópolis           | 25.116    | 106  | 37   | 102  | 32   | 10  | 4   |
| SP | Coroados                | 6.197     | 27   | 10   | 26   | 8    | 3   | 1   |
| SP | Coronel Macedo          | 4.591     | 20   | 7    | 19   | 6    | 2   | 1   |
| SP | Corumbataí              | 4.072     | 18   | 6    | 17   | 6    | 2   | 1   |
| SP | Cosmópolis              | 74.662    | 315  | 110  | 303  | 96   | 28  | 11  |
| SP | Cosmorama               | 7.289     | 31   | 11   | 30   | 10   | 3   | 1   |
| SP | Cotia                   | 257.882   | 1088 | 377  | 1046 | 329  | 97  | 35  |
| SP | Cravinhos               | 35.858    | 152  | 53   | 146  | 46   | 14  | 5   |
| SP | Cristais Paulista       | 8.803     | 38   | 13   | 36   | 12   | 4   | 2   |
| SP | Cruzália                | 2.021     | 9    | 3    | 9    | 3    | 1   | 1   |
| SP | Cruzeiro                | 82.895    | 350  | 122  | 336  | 106  | 32  | 12  |
| SP | Cubatão                 | 132.521   | 560  | 194  | 538  | 169  | 50  | 18  |
| SP | Cunha                   | 21.373    | 91   | 32   | 87   | 28   | 9   | 3   |
| SP | Descalvado              | 34.097    | 144  | 50   | 139  | 44   | 13  | 5   |
| SP | Diadema                 | 429.550   | 1813 | 628  | 1742 | 547  | 162 | 58  |
| SP | Dirce Reis              | 1.805     | 8    | 3    | 8    | 3    | 1   | 1   |
| SP | Divinolândia            | 11.027    | 47   | 17   | 45   | 15   | 5   | 2   |
| SP | Dobrada                 | 9.088     | 39   | 14   | 37   | 12   | 4   | 2   |
| SP | Dois Córregos           | 27.704    | 117  | 41   | 113  | 36   | 11  | 4   |
| SP | Dolcinópolis            | 2.108     | 9    | 4    | 9    | 3    | 1   | 1   |
| SP | Dourado                 | 8.883     | 38   | 13   | 37   | 12   | 4   | 2   |
| SP | Dracena                 | 47.287    | 200  | 70   | 192  | 61   | 18  | 7   |
| SP | Duartina                | 12.421    | 53   | 19   | 51   | 16   | 5   | 2   |
| SP | Dumont                  | 10.174    | 43   | 15   | 42   | 13   | 4   | 2   |
| SP | Echaporã                | 6.026     | 26   | 9    | 25   | 8    | 3   | 1   |

|    |                            |           |      |      |      |      |     |     |
|----|----------------------------|-----------|------|------|------|------|-----|-----|
| SP | Eldorado                   | 15.592    | 66   | 23   | 64   | 20   | 6   | 3   |
| SP | Elias Fausto               | 18.095    | 77   | 27   | 74   | 24   | 7   | 3   |
| SP | Elisiário                  | 3.742     | 16   | 6    | 16   | 5    | 2   | 1   |
| SP | Embaúba                    | 2.446     | 11   | 4    | 10   | 4    | 1   | 1   |
| SP | Embu das Artes             | 279.264   | 1179 | 408  | 1132 | 356  | 105 | 38  |
| SP | Embu-Guaçu                 | 70.402    | 298  | 103  | 286  | 90   | 27  | 10  |
| SP | Emilianópolis              | 3.238     | 14   | 5    | 14   | 5    | 2   | 1   |
| SP | Engenheiro Coelho          | 21.712    | 92   | 32   | 89   | 28   | 9   | 3   |
| SP | Espírito Santo do Pinhal   | 44.607    | 189  | 66   | 181  | 57   | 17  | 7   |
| SP | Espírito Santo do Turvo    | 4.926     | 21   | 8    | 20   | 7    | 2   | 1   |
| SP | Estrela d'Oeste            | 8.420     | 36   | 13   | 35   | 11   | 4   | 2   |
| SP | Estrela do Norte           | 2.774     | 12   | 5    | 12   | 4    | 2   | 1   |
| SP | Euclides da Cunha Paulista | 9.280     | 40   | 14   | 38   | 12   | 4   | 2   |
| SP | Fartura                    | 16.102    | 68   | 24   | 66   | 21   | 7   | 3   |
| SP | Fernandópolis              | 69.680    | 294  | 102  | 283  | 89   | 27  | 10  |
| SP | Fernando Prestes           | 5.805     | 25   | 9    | 24   | 8    | 3   | 1   |
| SP | Fernão                     | 1.739     | 8    | 3    | 8    | 3    | 1   | 1   |
| SP | Ferraz de Vasconcelos      | 198.661   | 839  | 291  | 806  | 253  | 75  | 27  |
| SP | Flora Rica                 | 1.397     | 6    | 3    | 6    | 2    | 1   | 1   |
| SP | Floreal                    | 2.884     | 13   | 5    | 12   | 4    | 2   | 1   |
| SP | Flórida Paulista           | 14.936    | 64   | 22   | 61   | 20   | 6   | 3   |
| SP | Florínea                   | 2.631     | 12   | 4    | 11   | 4    | 1   | 1   |
| SP | Franca                     | 358.539   | 1513 | 524  | 1454 | 457  | 135 | 49  |
| SP | Francisco Morato           | 179.372   | 757  | 263  | 728  | 229  | 68  | 25  |
| SP | Franco da Rocha            | 158.438   | 669  | 232  | 643  | 202  | 60  | 22  |
| SP | Gabriel Monteiro           | 2.776     | 12   | 5    | 12   | 4    | 2   | 1   |
| SP | Gália                      | 6.419     | 28   | 10   | 27   | 9    | 3   | 1   |
| SP | Garça                      | 44.429    | 188  | 65   | 181  | 57   | 17  | 6   |
| SP | Gastão Vidigal             | 4.911     | 21   | 8    | 20   | 7    | 2   | 1   |
| SP | Gavião Peixoto             | 4.841     | 21   | 8    | 20   | 7    | 2   | 1   |
| SP | General Salgado            | 10.855    | 46   | 16   | 44   | 14   | 5   | 2   |
| SP | Getulina                   | 11.485    | 49   | 17   | 47   | 15   | 5   | 2   |
| SP | Glicério                   | 4.842     | 21   | 8    | 20   | 7    | 2   | 1   |
| SP | Guaicara                   | 12.416    | 53   | 19   | 51   | 16   | 5   | 2   |
| SP | Guaimbê                    | 5.806     | 25   | 9    | 24   | 8    | 3   | 1   |
| SP | Guaira                     | 41.283    | 175  | 61   | 168  | 53   | 16  | 6   |
| SP | Guapiaçu                   | 22.087    | 94   | 33   | 90   | 29   | 9   | 3   |
| SP | Guapira                    | 16.896    | 72   | 25   | 69   | 22   | 7   | 3   |
| SP | Guará                      | 21.394    | 91   | 32   | 87   | 28   | 9   | 3   |
| SP | Guaraçai                   | 8.258     | 35   | 13   | 34   | 11   | 4   | 2   |
| SP | Guaraci                    | 11.382    | 49   | 17   | 47   | 15   | 5   | 2   |
| SP | Guarani d'Oeste            | 1.996     | 9    | 3    | 9    | 3    | 1   | 1   |
| SP | Guarantã                   | 6.685     | 29   | 10   | 28   | 9    | 3   | 1   |
| SP | Guararapes                 | 33.257    | 141  | 49   | 135  | 43   | 13  | 5   |
| SP | Guararema                  | 30.465    | 129  | 45   | 124  | 39   | 12  | 5   |
| SP | Guaratinguetá              | 123.192   | 520  | 180  | 500  | 157  | 47  | 17  |
| SP | Guareí                     | 19.244    | 82   | 29   | 78   | 25   | 8   | 3   |
| SP | Guariba                    | 40.857    | 173  | 60   | 166  | 53   | 16  | 6   |
| SP | Guarujá                    | 324.977   | 1371 | 475  | 1318 | 414  | 122 | 44  |
| SP | Guarulhos                  | 1.404.694 | 5926 | 2052 | 5694 | 1788 | 527 | 189 |
| SP | Guataparã                  | 7.760     | 33   | 12   | 32   | 10   | 3   | 2   |
| SP | Guzolândia                 | 5.346     | 23   | 8    | 22   | 7    | 3   | 1   |
| SP | Herculândia                | 9.649     | 41   | 15   | 40   | 13   | 4   | 2   |
| SP | Holambra                   | 15.605    | 66   | 23   | 64   | 20   | 6   | 3   |
| SP | Hortolândia                | 237.570   | 1003 | 348  | 963  | 303  | 90  | 32  |
| SP | Iacanga                    | 12.002    | 51   | 18   | 49   | 16   | 5   | 2   |
| SP | Iacri                      | 6.269     | 27   | 10   | 26   | 8    | 3   | 1   |
| SP | Iaras                      | 9.786     | 42   | 15   | 40   | 13   | 4   | 2   |
| SP | Ibaté                      | 35.830    | 152  | 53   | 146  | 46   | 14  | 5   |
| SP | Ibirá                      | 12.639    | 54   | 19   | 52   | 17   | 5   | 2   |
| SP | Ibirarema                  | 7.926     | 34   | 12   | 33   | 11   | 3   | 2   |
| SP | Ibitinga                   | 61.150    | 258  | 90   | 248  | 78   | 23  | 9   |
| SP | Ibiúna                     | 80.062    | 338  | 117  | 325  | 102  | 31  | 11  |
| SP | Ícém                       | 8.363     | 36   | 13   | 34   | 11   | 4   | 2   |
| SP | Iepê                       | 8.228     | 35   | 13   | 34   | 11   | 4   | 2   |
| SP | Igarapu do Tietê           | 24.821    | 105  | 37   | 101  | 32   | 10  | 4   |

|    |                     |         |      |     |      |     |     |    |
|----|---------------------|---------|------|-----|------|-----|-----|----|
| SP | Igarapava           | 30.791  | 130  | 45  | 125  | 40  | 12  | 5  |
| SP | Igaratá             | 9.631   | 41   | 15  | 40   | 13  | 4   | 2  |
| SP | Iguape              | 31.117  | 132  | 46  | 127  | 40  | 12  | 5  |
| SP | Ilhabela            | 36.194  | 153  | 53  | 147  | 47  | 14  | 5  |
| SP | Ilha Comprida       | 11.552  | 49   | 17  | 47   | 15  | 5   | 2  |
| SP | Ilha Solteira       | 26.886  | 114  | 40  | 109  | 35  | 11  | 4  |
| SP | Indaiatuba          | 260.690 | 1100 | 381 | 1057 | 332 | 98  | 36 |
| SP | Indiana             | 4.873   | 21   | 8   | 20   | 7   | 2   | 1  |
| SP | Indiaporã           | 3.876   | 17   | 6   | 16   | 5   | 2   | 1  |
| SP | Inúbia Paulista     | 4.045   | 18   | 6   | 17   | 6   | 2   | 1  |
| SP | Ipaussu             | 15.165  | 64   | 23  | 62   | 20  | 6   | 3  |
| SP | Iperó               | 38.771  | 164  | 57  | 158  | 50  | 15  | 6  |
| SP | Ipeúna              | 7.824   | 34   | 12  | 32   | 10  | 3   | 2  |
| SP | Ipiguá              | 5.557   | 24   | 9   | 23   | 8   | 3   | 1  |
| SP | Iporanga            | 4.180   | 18   | 7   | 17   | 6   | 2   | 1  |
| SP | Ipuã                | 16.794  | 71   | 25  | 69   | 22  | 7   | 3  |
| SP | Iracemápolis        | 24.982  | 106  | 37  | 102  | 32  | 10  | 4  |
| SP | Irapuã              | 8.101   | 35   | 12  | 33   | 11  | 4   | 2  |
| SP | Irapuru             | 8.356   | 36   | 13  | 34   | 11  | 4   | 2  |
| SP | Itaberá             | 17.405  | 74   | 26  | 71   | 23  | 7   | 3  |
| SP | Itaí                | 27.632  | 117  | 41  | 112  | 36  | 11  | 4  |
| SP | Itajobi             | 15.331  | 65   | 23  | 63   | 20  | 6   | 3  |
| SP | Itaju               | 3.937   | 17   | 6   | 16   | 6   | 2   | 1  |
| SP | Itanhaém            | 104.351 | 441  | 153 | 423  | 133 | 40  | 15 |
| SP | Itaoca              | 3.332   | 15   | 5   | 14   | 5   | 2   | 1  |
| SP | Itapeceira da Serra | 179.574 | 758  | 263 | 728  | 229 | 68  | 25 |
| SP | Itapetininga        | 167.106 | 705  | 245 | 678  | 213 | 63  | 23 |
| SP | Itapeva             | 95.241  | 402  | 140 | 387  | 122 | 36  | 13 |
| SP | Itapevi             | 244.131 | 1030 | 357 | 990  | 311 | 92  | 33 |
| SP | Itapira             | 75.683  | 320  | 111 | 307  | 97  | 29  | 11 |
| SP | Itapirapuã Paulista | 4.294   | 19   | 7   | 18   | 6   | 2   | 1  |
| SP | Itápolis            | 43.536  | 184  | 64  | 177  | 56  | 17  | 6  |
| SP | Itaporanga          | 15.197  | 65   | 23  | 62   | 20  | 6   | 3  |
| SP | Itapuí              | 14.297  | 61   | 21  | 58   | 19  | 6   | 2  |
| SP | Itapura             | 4.994   | 22   | 8   | 21   | 7   | 2   | 1  |
| SP | Itaquaquecetuba     | 379.082 | 1600 | 554 | 1537 | 483 | 143 | 52 |
| SP | Itararé             | 50.778  | 215  | 75  | 206  | 65  | 20  | 7  |
| SP | Itariri             | 17.754  | 75   | 26  | 72   | 23  | 7   | 3  |
| SP | Itatiba             | 124.254 | 525  | 182 | 504  | 159 | 47  | 17 |
| SP | Itatinga            | 21.139  | 90   | 31  | 86   | 27  | 8   | 3  |
| SP | Itirapina           | 18.610  | 79   | 28  | 76   | 24  | 7   | 3  |
| SP | Itirapuã            | 6.587   | 28   | 10  | 27   | 9   | 3   | 1  |
| SP | Itobi               | 7.862   | 34   | 12  | 32   | 11  | 3   | 2  |
| SP | Itu                 | 177.150 | 748  | 259 | 719  | 226 | 67  | 24 |
| SP | Itupeva             | 64.330  | 272  | 94  | 261  | 82  | 25  | 9  |
| SP | Ituverava           | 42.259  | 179  | 62  | 172  | 54  | 16  | 6  |
| SP | Jaborandi           | 6.963   | 30   | 11  | 29   | 9   | 3   | 1  |
| SP | Jaboticabal         | 78.029  | 330  | 114 | 317  | 100 | 30  | 11 |
| SP | Jacaré              | 237.119 | 1001 | 347 | 962  | 302 | 89  | 32 |
| SP | Jaci                | 7.322   | 31   | 11  | 30   | 10  | 3   | 1  |
| SP | Jacupiranga         | 17.911  | 76   | 27  | 73   | 23  | 7   | 3  |
| SP | Jaguariúna          | 59.921  | 253  | 88  | 243  | 77  | 23  | 9  |
| SP | Jales               | 49.291  | 208  | 72  | 200  | 63  | 19  | 7  |
| SP | Jambeiro            | 6.828   | 29   | 10  | 28   | 9   | 3   | 1  |
| SP | Jandira             | 127.734 | 539  | 187 | 518  | 163 | 48  | 18 |
| SP | Jardinópolis        | 45.544  | 193  | 67  | 185  | 58  | 18  | 7  |
| SP | Jarinu              | 31.173  | 132  | 46  | 127  | 40  | 12  | 5  |
| SP | Jaú                 | 153.463 | 648  | 225 | 623  | 196 | 58  | 21 |
| SP | Jeriquara           | 3.143   | 14   | 5   | 13   | 5   | 2   | 1  |
| SP | Joanópolis          | 13.453  | 57   | 20  | 55   | 18  | 6   | 2  |
| SP | João Ramalho        | 4.577   | 20   | 7   | 19   | 6   | 2   | 1  |
| SP | José Bonifácio      | 37.707  | 160  | 56  | 153  | 48  | 15  | 6  |
| SP | Júlio Mesquita      | 4.824   | 21   | 8   | 20   | 7   | 2   | 1  |
| SP | Jumirim             | 3.467   | 15   | 6   | 15   | 5   | 2   | 1  |
| SP | Jundiá              | 426.935 | 1802 | 624 | 1731 | 544 | 161 | 58 |
| SP | Junqueirópolis      | 20.978  | 89   | 31  | 86   | 27  | 8   | 3  |

|    |                         |         |      |     |      |     |     |    |
|----|-------------------------|---------|------|-----|------|-----|-----|----|
| SP | Juquiá                  | 18.627  | 79   | 28  | 76   | 24  | 7   | 3  |
| SP | Juquitiba               | 31.844  | 135  | 47  | 130  | 41  | 12  | 5  |
| SP | Lagoinha                | 4.882   | 21   | 8   | 20   | 7   | 2   | 1  |
| SP | Laranjal Paulista       | 29.047  | 123  | 43  | 118  | 37  | 11  | 4  |
| SP | Lavinia                 | 12.581  | 54   | 19  | 51   | 17  | 5   | 2  |
| SP | Lavrinhas               | 7.361   | 32   | 11  | 30   | 10  | 3   | 1  |
| SP | Leme                    | 105.273 | 445  | 154 | 427  | 134 | 40  | 15 |
| SP | Lençóis Paulista        | 69.533  | 294  | 102 | 282  | 89  | 27  | 10 |
| SP | Limeira                 | 310.783 | 1312 | 454 | 1260 | 396 | 117 | 42 |
| SP | Lindóia                 | 8.201   | 35   | 12  | 34   | 11  | 4   | 2  |
| SP | Lins                    | 78.978  | 334  | 116 | 321  | 101 | 30  | 11 |
| SP | Lorena                  | 89.532  | 378  | 131 | 363  | 114 | 34  | 13 |
| SP | Lourdes                 | 2.311   | 10   | 4   | 10   | 3   | 1   | 1  |
| SP | Louveira                | 51.007  | 216  | 75  | 207  | 65  | 20  | 7  |
| SP | Lucélia                 | 22.022  | 93   | 33  | 90   | 29  | 9   | 3  |
| SP | Lucianópolis            | 2.412   | 11   | 4   | 10   | 4   | 1   | 1  |
| SP | Luís Antônio            | 15.628  | 66   | 23  | 64   | 20  | 6   | 3  |
| SP | Luiziânia               | 5.918   | 25   | 9   | 24   | 8   | 3   | 1  |
| SP | Lupércio                | 4.608   | 20   | 7   | 19   | 6   | 2   | 1  |
| SP | Lutécia                 | 2.623   | 12   | 4   | 11   | 4   | 1   | 1  |
| SP | Macatuba                | 17.263  | 73   | 26  | 70   | 22  | 7   | 3  |
| SP | Macaubal                | 8.174   | 35   | 12  | 34   | 11  | 4   | 2  |
| SP | Macedônia               | 3.686   | 16   | 6   | 15   | 5   | 2   | 1  |
| SP | Magda                   | 3.086   | 14   | 5   | 13   | 4   | 2   | 1  |
| SP | Mairinque               | 47.723  | 202  | 70  | 194  | 61  | 18  | 7  |
| SP | Mairiporã               | 103.645 | 438  | 152 | 421  | 132 | 39  | 14 |
| SP | Manduri                 | 9.972   | 43   | 15  | 41   | 13  | 4   | 2  |
| SP | Marabá Paulista         | 6.039   | 26   | 9   | 25   | 8   | 3   | 1  |
| SP | Maracá                  | 14.069  | 60   | 21  | 58   | 18  | 6   | 2  |
| SP | Marapoama               | 3.097   | 14   | 5   | 13   | 4   | 2   | 1  |
| SP | Mariápolis              | 4.098   | 18   | 6   | 17   | 6   | 2   | 1  |
| SP | Marília                 | 242.249 | 1022 | 354 | 982  | 309 | 91  | 33 |
| SP | Marinópolis             | 2.101   | 9    | 4   | 9    | 3   | 1   | 1  |
| SP | Martinópolis            | 26.791  | 114  | 40  | 109  | 35  | 11  | 4  |
| SP | Matão                   | 84.069  | 355  | 123 | 341  | 108 | 32  | 12 |
| SP | Mauá                    | 481.725 | 2033 | 704 | 1953 | 614 | 181 | 65 |
| SP | Mendonça                | 5.638   | 24   | 9   | 23   | 8   | 3   | 1  |
| SP | Meridiano               | 3.813   | 17   | 6   | 16   | 5   | 2   | 1  |
| SP | Mesópolis               | 1.903   | 9    | 3   | 8    | 3   | 1   | 1  |
| SP | Miguelópolis            | 22.480  | 95   | 33  | 92   | 29  | 9   | 4  |
| SP | Mineiros do Tietê       | 13.023  | 55   | 20  | 53   | 17  | 5   | 2  |
| SP | Miracatu                | 19.511  | 83   | 29  | 80   | 25  | 8   | 3  |
| SP | Mira Estrela            | 3.125   | 14   | 5   | 13   | 4   | 2   | 1  |
| SP | Mirandópolis            | 29.844  | 126  | 44  | 121  | 38  | 12  | 5  |
| SP | Mirante do Paranapanema | 18.415  | 78   | 27  | 75   | 24  | 7   | 3  |
| SP | Mirassol                | 60.768  | 257  | 89  | 247  | 78  | 23  | 9  |
| SP | Mirassolândia           | 4.966   | 21   | 8   | 21   | 7   | 2   | 1  |
| SP | Mococa                  | 69.072  | 292  | 101 | 280  | 88  | 26  | 10 |
| SP | Mogi das Cruzes         | 455.587 | 1922 | 666 | 1847 | 580 | 171 | 62 |
| SP | Mogi Guaçu              | 154.146 | 651  | 226 | 625  | 197 | 58  | 21 |
| SP | Mogi Mirim              | 94.098  | 397  | 138 | 382  | 120 | 36  | 13 |
| SP | Mombuca                 | 3.523   | 15   | 6   | 15   | 5   | 2   | 1  |
| SP | Monções                 | 2.274   | 10   | 4   | 10   | 3   | 1   | 1  |
| SP | Mongaguá                | 58.567  | 248  | 86  | 238  | 75  | 22  | 8  |
| SP | Monte Alegre do Sul     | 8.181   | 35   | 12  | 34   | 11  | 4   | 2  |
| SP | Monte Alto              | 51.039  | 216  | 75  | 207  | 65  | 20  | 7  |
| SP | Monte Aprazível         | 25.651  | 109  | 38  | 104  | 33  | 10  | 4  |
| SP | Monte Azul Paulista     | 18.928  | 80   | 28  | 77   | 25  | 8   | 3  |
| SP | Monte Castelo           | 4.166   | 18   | 7   | 17   | 6   | 2   | 1  |
| SP | Monteiro Lobato         | 4.739   | 20   | 7   | 20   | 7   | 2   | 1  |
| SP | Monte Mor               | 61.707  | 261  | 91  | 251  | 79  | 24  | 9  |
| SP | Morro Agudo             | 33.598  | 142  | 50  | 137  | 43  | 13  | 5  |
| SP | Morungaba               | 13.936  | 59   | 21  | 57   | 18  | 6   | 2  |
| SP | Motuca                  | 4.831   | 21   | 8   | 20   | 7   | 2   | 1  |
| SP | Murutinga do Sul        | 4.525   | 20   | 7   | 19   | 6   | 2   | 1  |
| SP | Nantes                  | 3.215   | 14   | 5   | 14   | 5   | 2   | 1  |

|    |                     |         |      |      |      |     |     |    |
|----|---------------------|---------|------|------|------|-----|-----|----|
| SP | Narandiba           | 4.950   | 21   | 8    | 21   | 7   | 2   | 1  |
| SP | Natividade da Serra | 6.624   | 28   | 10   | 27   | 9   | 3   | 1  |
| SP | Nazaré Paulista     | 18.866  | 80   | 28   | 77   | 25  | 8   | 3  |
| SP | Neves Paulista      | 8.917   | 38   | 14   | 37   | 12  | 4   | 2  |
| SP | Nhandeara           | 11.575  | 49   | 17   | 47   | 15  | 5   | 2  |
| SP | Nipoã               | 5.381   | 23   | 8    | 22   | 7   | 3   | 1  |
| SP | Nova Aliança        | 7.161   | 31   | 11   | 30   | 10  | 3   | 1  |
| SP | Nova Campina        | 9.962   | 43   | 15   | 41   | 13  | 4   | 2  |
| SP | Nova Canaã Paulista | 1.824   | 8    | 3    | 8    | 3   | 1   | 1  |
| SP | Nova Castilho       | 1.290   | 6    | 2    | 6    | 2   | 1   | 1  |
| SP | Nova Europa         | 11.519  | 49   | 17   | 47   | 15  | 5   | 2  |
| SP | Nova Granada        | 21.871  | 93   | 32   | 89   | 28  | 9   | 3  |
| SP | Nova Guataporanga   | 2.333   | 10   | 4    | 10   | 3   | 1   | 1  |
| SP | Nova Independência  | 4.135   | 18   | 7    | 17   | 6   | 2   | 1  |
| SP | Novais              | 6.057   | 26   | 9    | 25   | 8   | 3   | 1  |
| SP | Nova Luzitânia      | 4.217   | 18   | 7    | 18   | 6   | 2   | 1  |
| SP | Nova Odessa         | 61.716  | 261  | 91   | 251  | 79  | 24  | 9  |
| SP | Novo Horizonte      | 41.765  | 177  | 62   | 170  | 54  | 16  | 6  |
| SP | Nuporanga           | 7.522   | 32   | 11   | 31   | 10  | 3   | 2  |
| SP | Ocaçu               | 4.294   | 19   | 7    | 18   | 6   | 2   | 1  |
| SP | Óleo                | 2.447   | 11   | 4    | 10   | 4   | 1   | 1  |
| SP | Olimpia             | 55.477  | 235  | 82   | 225  | 71  | 21  | 8  |
| SP | Onda Verde          | 4.462   | 19   | 7    | 19   | 6   | 2   | 1  |
| SP | Oriente             | 6.569   | 28   | 10   | 27   | 9   | 3   | 1  |
| SP | Orindiúva           | 7.318   | 31   | 11   | 30   | 10  | 3   | 1  |
| SP | Orlândia            | 44.682  | 189  | 66   | 182  | 57  | 17  | 7  |
| SP | Osasco              | 701.428 | 2960 | 1025 | 2844 | 893 | 263 | 95 |
| SP | Oscar Bressane      | 2.603   | 11   | 4    | 11   | 4   | 1   | 1  |
| SP | Osvaldo Cruz        | 33.118  | 140  | 49   | 135  | 43  | 13  | 5  |
| SP | Ourinhos            | 115.139 | 486  | 169  | 467  | 147 | 44  | 16 |
| SP | Ouroeste            | 10.712  | 46   | 16   | 44   | 14  | 5   | 2  |
| SP | Ouro Verde          | 8.676   | 37   | 13   | 36   | 12  | 4   | 2  |
| SP | Pacaembu            | 14.326  | 61   | 21   | 59   | 19  | 6   | 2  |
| SP | Palestina           | 13.285  | 57   | 20   | 54   | 17  | 5   | 2  |
| SP | Palmares Paulista   | 13.691  | 58   | 20   | 56   | 18  | 6   | 2  |
| SP | Palmeira d'Oeste    | 9.173   | 39   | 14   | 38   | 12  | 4   | 2  |
| SP | Palmital            | 22.322  | 95   | 33   | 91   | 29  | 9   | 4  |
| SP | Panorama            | 15.944  | 68   | 24   | 65   | 21  | 6   | 3  |
| SP | Paraguaçu Paulista  | 46.180  | 195  | 68   | 188  | 59  | 18  | 7  |
| SP | Paraibuna           | 18.302  | 78   | 27   | 75   | 24  | 7   | 3  |
| SP | Paraíso             | 6.536   | 28   | 10   | 27   | 9   | 3   | 1  |
| SP | Paranapanema        | 20.588  | 87   | 31   | 84   | 27  | 8   | 3  |
| SP | Paranapuã           | 4.112   | 18   | 7    | 17   | 6   | 2   | 1  |
| SP | Parapuã             | 10.934  | 47   | 16   | 45   | 14  | 5   | 2  |
| SP | Pardinho            | 6.579   | 28   | 10   | 27   | 9   | 3   | 1  |
| SP | Paríquera-Açu       | 19.797  | 84   | 29   | 81   | 26  | 8   | 3  |
| SP | Parisi              | 2.177   | 10   | 4    | 9    | 3   | 1   | 1  |
| SP | Patrocínio Paulista | 14.941  | 64   | 22   | 61   | 20  | 6   | 3  |
| SP | Paulicéia           | 7.540   | 32   | 12   | 31   | 10  | 3   | 2  |
| SP | Paulínia            | 114.508 | 484  | 168  | 465  | 146 | 43  | 16 |
| SP | Paulistânia         | 1.835   | 8    | 3    | 8    | 3   | 1   | 1  |
| SP | Paulo de Faria      | 8.973   | 38   | 14   | 37   | 12  | 4   | 2  |
| SP | Pederneiras         | 47.523  | 201  | 70   | 193  | 61  | 18  | 7  |
| SP | Pedra Bela          | 6.127   | 26   | 9    | 25   | 8   | 3   | 1  |
| SP | Pedranópolis        | 2.468   | 11   | 4    | 11   | 4   | 1   | 1  |
| SP | Pedregulho          | 16.876  | 72   | 25   | 69   | 22  | 7   | 3  |
| SP | Pedreira            | 48.992  | 207  | 72   | 199  | 63  | 19  | 7  |
| SP | Pedrinhas Paulista  | 3.109   | 14   | 5    | 13   | 4   | 2   | 1  |
| SP | Pedro de Toledo     | 11.507  | 49   | 17   | 47   | 15  | 5   | 2  |
| SP | Penápolis           | 64.098  | 271  | 94   | 260  | 82  | 25  | 9  |
| SP | Pereira Barreto     | 25.685  | 109  | 38   | 105  | 33  | 10  | 4  |
| SP | Pereiras            | 8.875   | 38   | 13   | 36   | 12  | 4   | 2  |
| SP | Peruibe             | 69.697  | 295  | 102  | 283  | 89  | 27  | 10 |
| SP | Piacatu             | 6.093   | 26   | 9    | 25   | 8   | 3   | 1  |
| SP | Piedade             | 55.731  | 236  | 82   | 226  | 71  | 21  | 8  |
| SP | Pilar do Sul        | 29.612  | 125  | 44   | 121  | 38  | 12  | 4  |



|    |                       |         |      |      |      |     |     |    |
|----|-----------------------|---------|------|------|------|-----|-----|----|
| SP | Pindamonhangaba       | 171.885 | 726  | 252  | 697  | 219 | 65  | 24 |
| SP | Pindorama             | 17.378  | 74   | 26   | 71   | 23  | 7   | 3  |
| SP | Pinhalzinho           | 15.564  | 66   | 23   | 64   | 20  | 6   | 3  |
| SP | Piquerobi             | 3.706   | 16   | 6    | 16   | 5   | 2   | 1  |
| SP | Piquete               | 13.495  | 57   | 20   | 55   | 18  | 6   | 2  |
| SP | Piracaia              | 27.617  | 117  | 41   | 112  | 36  | 11  | 4  |
| SP | Piracicaba            | 410.275 | 1731 | 600  | 1663 | 523 | 154 | 56 |
| SP | Piraju                | 29.930  | 127  | 44   | 122  | 39  | 12  | 5  |
| SP | Pirajuí               | 25.939  | 110  | 38   | 106  | 34  | 10  | 4  |
| SP | Pirangi               | 11.524  | 49   | 17   | 47   | 15  | 5   | 2  |
| SP | Pirapora do Bom Jesus | 19.453  | 83   | 29   | 79   | 25  | 8   | 3  |
| SP | Pirapozinho           | 27.974  | 119  | 41   | 114  | 36  | 11  | 4  |
| SP | Pirassununga          | 77.330  | 327  | 113  | 314  | 99  | 29  | 11 |
| SP | Piratinga             | 13.890  | 59   | 21   | 57   | 18  | 6   | 2  |
| SP | Pitangueiras          | 40.430  | 171  | 60   | 164  | 52  | 16  | 6  |
| SP | Planalto              | 5.370   | 23   | 8    | 22   | 7   | 3   | 1  |
| SP | Platina               | 3.606   | 16   | 6    | 15   | 5   | 2   | 1  |
| SP | Poá                   | 119.221 | 503  | 175  | 484  | 152 | 45  | 17 |
| SP | Poloni                | 6.166   | 27   | 10   | 25   | 8   | 3   | 1  |
| SP | Pompéia               | 22.326  | 95   | 33   | 91   | 29  | 9   | 4  |
| SP | Pongai                | 3.385   | 15   | 5    | 14   | 5   | 2   | 1  |
| SP | Pontal                | 51.717  | 219  | 76   | 210  | 66  | 20  | 7  |
| SP | Pontalinda            | 4.719   | 20   | 7    | 20   | 7   | 2   | 1  |
| SP | Pontes Gestal         | 2.576   | 11   | 4    | 11   | 4   | 1   | 1  |
| SP | Populina              | 4.136   | 18   | 7    | 17   | 6   | 2   | 1  |
| SP | Porangaba             | 10.205  | 44   | 15   | 42   | 13  | 4   | 2  |
| SP | Porto Feliz           | 53.698  | 227  | 79   | 218  | 69  | 21  | 8  |
| SP | Porto Ferreira        | 56.848  | 240  | 84   | 231  | 73  | 22  | 8  |
| SP | Potim                 | 25.603  | 109  | 38   | 104  | 33  | 10  | 4  |
| SP | Potirendaba           | 17.668  | 75   | 26   | 72   | 23  | 7   | 3  |
| SP | Pracinha              | 4.327   | 19   | 7    | 18   | 6   | 2   | 1  |
| SP | Pradópolis            | 22.239  | 94   | 33   | 91   | 29  | 9   | 3  |
| SP | Praia Grande          | 336.454 | 1420 | 492  | 1364 | 429 | 127 | 46 |
| SP | Pratânia              | 5.371   | 23   | 8    | 22   | 7   | 3   | 1  |
| SP | Presidente Alves      | 4.067   | 18   | 6    | 17   | 6   | 2   | 1  |
| SP | Presidente Bernardes  | 12.943  | 55   | 19   | 53   | 17  | 5   | 2  |
| SP | Presidente Epitácio   | 44.572  | 189  | 66   | 181  | 57  | 17  | 6  |
| SP | Presidente Prudente   | 231.953 | 979  | 339  | 941  | 296 | 87  | 32 |
| SP | Presidente Venceslau  | 39.648  | 168  | 58   | 161  | 51  | 15  | 6  |
| SP | Promissão             | 41.211  | 174  | 61   | 168  | 53  | 16  | 6  |
| SP | Quadra                | 3.902   | 17   | 6    | 16   | 5   | 2   | 1  |
| SP | Quatá                 | 14.309  | 61   | 21   | 58   | 19  | 6   | 2  |
| SP | Queiroz               | 3.513   | 15   | 6    | 15   | 5   | 2   | 1  |
| SP | Queluz                | 13.788  | 59   | 21   | 56   | 18  | 6   | 2  |
| SP | Quintana              | 6.736   | 29   | 10   | 28   | 9   | 3   | 1  |
| SP | Rafard                | 9.126   | 39   | 14   | 37   | 12  | 4   | 2  |
| SP | Rancharia             | 29.743  | 126  | 44   | 121  | 38  | 12  | 5  |
| SP | Redenção da Serra     | 3.827   | 17   | 6    | 16   | 5   | 2   | 1  |
| SP | Regente Feijó         | 20.523  | 87   | 30   | 84   | 27  | 8   | 3  |
| SP | Reginópolis           | 10.047  | 43   | 15   | 41   | 13  | 4   | 2  |
| SP | Registro              | 56.463  | 239  | 83   | 229  | 72  | 22  | 8  |
| SP | Restinga              | 7.762   | 33   | 12   | 32   | 10  | 3   | 2  |
| SP | Ribeira               | 3.320   | 15   | 5    | 14   | 5   | 2   | 1  |
| SP | Ribeirão Bonito       | 13.376  | 57   | 20   | 55   | 18  | 6   | 2  |
| SP | Ribeirão Branco       | 15.984  | 68   | 24   | 65   | 21  | 6   | 3  |
| SP | Ribeirão Corrente     | 4.786   | 21   | 7    | 20   | 7   | 2   | 1  |
| SP | Ribeirão do Sul       | 4.537   | 20   | 7    | 19   | 6   | 2   | 1  |
| SP | Ribeirão dos Índios   | 2.222   | 10   | 4    | 10   | 3   | 1   | 1  |
| SP | Ribeirão Grande       | 7.686   | 33   | 12   | 32   | 10  | 3   | 2  |
| SP | Ribeirão Pires        | 125.238 | 529  | 183  | 508  | 160 | 47  | 17 |
| SP | Ribeirão Preto        | 720.116 | 3038 | 1052 | 2919 | 917 | 270 | 97 |
| SP | Riversul              | 5.364   | 23   | 8    | 22   | 7   | 3   | 1  |
| SP | Rifaina               | 3.651   | 16   | 6    | 15   | 5   | 2   | 1  |
| SP | Rincão                | 10.824  | 46   | 16   | 44   | 14  | 5   | 2  |
| SP | Rinópolis             | 9.940   | 42   | 15   | 41   | 13  | 4   | 2  |
| SP | Rio Claro             | 209.548 | 885  | 307  | 850  | 267 | 79  | 29 |

|    |                            |         |      |      |      |      |     |     |
|----|----------------------------|---------|------|------|------|------|-----|-----|
| SP | Rio das Pedras             | 36.233  | 153  | 53   | 147  | 47   | 14  | 5   |
| SP | Rio Grande da Serra        | 52.009  | 220  | 76   | 211  | 67   | 20  | 7   |
| SP | Riolândia                  | 12.856  | 55   | 19   | 53   | 17   | 5   | 2   |
| SP | Rosana                     | 15.929  | 68   | 24   | 65   | 21   | 6   | 3   |
| SP | Roseira                    | 10.888  | 46   | 16   | 45   | 14   | 5   | 2   |
| SP | Rubiácea                   | 3.195   | 14   | 5    | 13   | 5    | 2   | 1   |
| SP | Rubinéia                   | 3.191   | 14   | 5    | 13   | 5    | 2   | 1   |
| SP | Sabino                     | 5.638   | 24   | 9    | 23   | 8    | 3   | 1   |
| SP | Sagres                     | 2.427   | 11   | 4    | 10   | 4    | 1   | 1   |
| SP | Sales                      | 6.481   | 28   | 10   | 27   | 9    | 3   | 1   |
| SP | Sales Oliveira             | 12.103  | 52   | 18   | 50   | 16   | 5   | 2   |
| SP | Salesópolis                | 17.363  | 74   | 26   | 71   | 23   | 7   | 3   |
| SP | Salmourão                  | 5.372   | 23   | 8    | 22   | 7    | 3   | 1   |
| SP | Saltinho                   | 8.498   | 36   | 13   | 35   | 11   | 4   | 2   |
| SP | Salto                      | 120.779 | 510  | 177  | 490  | 154  | 46  | 17  |
| SP | Salto de Pirapora          | 46.285  | 196  | 68   | 188  | 59   | 18  | 7   |
| SP | Salto Grande               | 9.396   | 40   | 14   | 39   | 12   | 4   | 2   |
| SP | Sandovalina                | 4.405   | 19   | 7    | 18   | 6    | 2   | 1   |
| SP | Santa Adélia               | 15.639  | 66   | 23   | 64   | 20   | 6   | 3   |
| SP | Santa Albertina            | 6.036   | 26   | 9    | 25   | 8    | 3   | 1   |
| SP | Santa Bárbara d'Oeste      | 195.278 | 824  | 286  | 792  | 249  | 74  | 27  |
| SP | Santa Branca               | 14.925  | 63   | 22   | 61   | 19   | 6   | 3   |
| SP | Santa Clara d'Oeste        | 2.111   | 9    | 4    | 9    | 3    | 1   | 1   |
| SP | Santa Cruz da Conceição    | 4.584   | 20   | 7    | 19   | 6    | 2   | 1   |
| SP | Santa Cruz da Esperança    | 2.166   | 10   | 4    | 9    | 3    | 1   | 1   |
| SP | Santa Cruz das Palmeiras   | 35.102  | 149  | 52   | 143  | 45   | 14  | 5   |
| SP | Santa Cruz do Rio Pardo    | 48.207  | 204  | 71   | 196  | 62   | 19  | 7   |
| SP | Santa Ernestina            | 5.577   | 24   | 9    | 23   | 8    | 3   | 1   |
| SP | Santa Fé do Sul            | 32.796  | 139  | 48   | 133  | 42   | 13  | 5   |
| SP | Santa Gertrudes            | 27.850  | 118  | 41   | 113  | 36   | 11  | 4   |
| SP | Santa Isabel               | 58.529  | 247  | 86   | 238  | 75   | 22  | 8   |
| SP | Santa Lúcia                | 8.889   | 38   | 13   | 37   | 12   | 4   | 2   |
| SP | Santa Maria da Serra       | 6.298   | 27   | 10   | 26   | 9    | 3   | 1   |
| SP | Santa Mercedes             | 2.947   | 13   | 5    | 12   | 4    | 2   | 1   |
| SP | Santana da Ponte Pensa     | 1.448   | 7    | 3    | 6    | 2    | 1   | 1   |
| SP | Santana de Parnaíba        | 145.073 | 613  | 212  | 589  | 185  | 55  | 20  |
| SP | Santa Rita d'Oeste         | 2.476   | 11   | 4    | 11   | 4    | 1   | 1   |
| SP | Santa Rita do Passa Quatro | 27.641  | 117  | 41   | 113  | 36   | 11  | 4   |
| SP | Santa Rosa de Viterbo      | 26.960  | 114  | 40   | 110  | 35   | 11  | 4   |
| SP | Santa Salete               | 1.558   | 7    | 3    | 7    | 2    | 1   | 1   |
| SP | Santo Anastácio            | 20.855  | 88   | 31   | 85   | 27   | 8   | 3   |
| SP | Santo André                | 723.889 | 3054 | 1058 | 2935 | 922  | 272 | 98  |
| SP | Santo Antônio da Alegria   | 7.024   | 30   | 11   | 29   | 9    | 3   | 1   |
| SP | Santo Antônio de Posse     | 23.742  | 101  | 35   | 97   | 31   | 9   | 4   |
| SP | Santo Antônio do Aracanguá | 8.541   | 37   | 13   | 35   | 11   | 4   | 2   |
| SP | Santo Antônio do Jardim    | 5.926   | 25   | 9    | 25   | 8    | 3   | 1   |
| SP | Santo Antônio do Pinhal    | 6.843   | 29   | 10   | 28   | 9    | 3   | 1   |
| SP | Santo Expedito             | 3.159   | 14   | 5    | 13   | 5    | 2   | 1   |
| SP | Santópolis do Aguapeí      | 4.856   | 21   | 8    | 20   | 7    | 2   | 1   |
| SP | Santos                     | 433.991 | 1831 | 634  | 1760 | 553  | 163 | 59  |
| SP | São Bento do Sapucaí       | 10.907  | 47   | 16   | 45   | 14   | 5   | 2   |
| SP | São Bernardo do Campo      | 849.874 | 3586 | 1242 | 3445 | 1082 | 319 | 115 |
| SP | São Caetano do Sul         | 162.763 | 687  | 238  | 660  | 208  | 62  | 22  |
| SP | São Carlos                 | 256.915 | 1084 | 376  | 1042 | 327  | 97  | 35  |
| SP | São Francisco              | 2.813   | 12   | 5    | 12   | 4    | 2   | 1   |
| SP | São João da Boa Vista      | 92.315  | 390  | 135  | 375  | 118  | 35  | 13  |
| SP | São João das Duas Pontes   | 2.555   | 11   | 4    | 11   | 4    | 1   | 1   |
| SP | São João de Iracema        | 1.942   | 9    | 3    | 8    | 3    | 1   | 1   |
| SP | São João do Pau d'Alho     | 2.095   | 9    | 4    | 9    | 3    | 1   | 1   |
| SP | São Joaquim da Barra       | 52.737  | 223  | 78   | 214  | 68   | 20  | 8   |
| SP | São José da Bela Vista     | 8.991   | 38   | 14   | 37   | 12   | 4   | 2   |
| SP | São José do Barreiro       | 4.141   | 18   | 7    | 17   | 6    | 2   | 1   |
| SP | São José do Rio Pardo      | 55.298  | 234  | 81   | 225  | 71   | 21  | 8   |
| SP | São José do Rio Preto      | 469.173 | 1980 | 686  | 1902 | 598  | 176 | 64  |
| SP | São José dos Campos        | 737.310 | 3111 | 1077 | 2989 | 939  | 277 | 100 |
| SP | São Lourenço da Serra      | 16.127  | 69   | 24   | 66   | 21   | 7   | 3   |

|    |                         |            |       |       |       |       |      |      |
|----|-------------------------|------------|-------|-------|-------|-------|------|------|
| SP | São Luiz do Paraitinga  | 10.693     | 46    | 16    | 44    | 14    | 5    | 2    |
| SP | São Manuel              | 41.287     | 175   | 61    | 168   | 53    | 16   | 6    |
| SP | São Miguel Arcanjo      | 33.071     | 140   | 49    | 135   | 43    | 13   | 5    |
| SP | São Paulo               | 12.396.372 | 52297 | 18108 | 50245 | 15778 | 4647 | 1668 |
| SP | São Pedro               | 36.298     | 154   | 54    | 148   | 47    | 14   | 5    |
| SP | São Pedro do Turvo      | 7.724      | 33    | 12    | 32    | 10    | 3    | 2    |
| SP | São Roque               | 93.076     | 393   | 136   | 378   | 119   | 35   | 13   |
| SP | São Sebastião           | 91.637     | 387   | 134   | 372   | 117   | 35   | 13   |
| SP | São Sebastião da Gramma | 12.137     | 52    | 18    | 50    | 16    | 5    | 2    |
| SP | São Simão               | 15.446     | 66    | 23    | 63    | 20    | 6    | 3    |
| SP | São Vicente             | 370.839    | 1565  | 542   | 1504  | 472   | 139  | 50   |
| SP | Sarapuá                 | 10.493     | 45    | 16    | 43    | 14    | 4    | 2    |
| SP | Sarutaiá                | 3.623      | 16    | 6     | 15    | 5     | 2    | 1    |
| SP | Sebastianópolis do Sul  | 3.595      | 16    | 6     | 15    | 5     | 2    | 1    |
| SP | Serra Azul              | 15.292     | 65    | 23    | 62    | 20    | 6    | 3    |
| SP | Serrana                 | 46.166     | 195   | 68    | 188   | 59    | 18   | 7    |
| SP | Serra Negra             | 29.669     | 126   | 44    | 121   | 38    | 12   | 4    |
| SP | Sertãozinho             | 128.432    | 542   | 188   | 521   | 164   | 49   | 18   |
| SP | Sete Barras             | 12.731     | 54    | 19    | 52    | 17    | 5    | 2    |
| SP | Severínia               | 17.820     | 76    | 27    | 73    | 23    | 7    | 3    |
| SP | Silveiras               | 6.375      | 27    | 10    | 26    | 9     | 3    | 1    |
| SP | Socorro                 | 41.690     | 176   | 61    | 169   | 54    | 16   | 6    |
| SP | Sorocaba                | 695.328    | 2934  | 1016  | 2819  | 885   | 261  | 94   |
| SP | Sud Mennucci            | 7.738      | 33    | 12    | 32    | 10    | 3    | 2    |
| SP | Sumaré                  | 289.875    | 1223  | 424   | 1175  | 369   | 109  | 39   |
| SP | Suzano                  | 303.397    | 1280  | 444   | 1230  | 387   | 114  | 41   |
| SP | Suzanópolis             | 4.063      | 18    | 6     | 17    | 6     | 2    | 1    |
| SP | Tabapuã                 | 12.561     | 53    | 19    | 51    | 16    | 5    | 2    |
| SP | Tabatinga               | 16.787     | 71    | 25    | 69    | 22    | 7    | 3    |
| SP | Taboão da Serra         | 297.528    | 1256  | 435   | 1206  | 379   | 112  | 41   |
| SP | Taciba                  | 6.371      | 27    | 10    | 26    | 9     | 3    | 1    |
| SP | Taguaí                  | 14.415     | 61    | 22    | 59    | 19    | 6    | 2    |
| SP | Taiacu                  | 6.346      | 27    | 10    | 26    | 9     | 3    | 1    |
| SP | Taiúva                  | 5.562      | 24    | 9     | 23    | 8     | 3    | 1    |
| SP | Tambaú                  | 23.255     | 99    | 34    | 95    | 30    | 9    | 4    |
| SP | Tanabi                  | 26.231     | 111   | 39    | 107   | 34    | 10   | 4    |
| SP | Tapiraí                 | 7.725      | 33    | 12    | 32    | 10    | 3    | 2    |
| SP | Tapiratiba              | 12.940     | 55    | 19    | 53    | 17    | 5    | 2    |
| SP | Taquaral                | 2.815      | 12    | 5     | 12    | 4     | 2    | 1    |
| SP | Taquaritinga            | 57.547     | 243   | 85    | 234   | 74    | 22   | 8    |
| SP | Taquarituba             | 23.292     | 99    | 35    | 95    | 30    | 9    | 4    |
| SP | Taquarivai              | 5.968      | 26    | 9     | 25    | 8     | 3    | 1    |
| SP | Tarabai                 | 7.609      | 33    | 12    | 31    | 10    | 3    | 2    |
| SP | Tarumã                  | 15.361     | 65    | 23    | 63    | 20    | 6    | 3    |
| SP | Tatuí                   | 124.134    | 524   | 182   | 504   | 158   | 47   | 17   |
| SP | Taubaté                 | 320.820    | 1354  | 469   | 1301  | 409   | 121  | 44   |
| SP | Tejupá                  | 4.452      | 19    | 7     | 19    | 6     | 2    | 1    |
| SP | Teodoro Sampaio         | 23.395     | 99    | 35    | 95    | 30    | 9    | 4    |
| SP | Terra Roxa              | 9.502      | 41    | 14    | 39    | 13    | 4    | 2    |
| SP | Tietê                   | 42.946     | 182   | 63    | 175   | 55    | 17   | 6    |
| SP | Timburi                 | 2.647      | 12    | 4     | 11    | 4     | 1    | 1    |
| SP | Torre de Pedra          | 2.432      | 11    | 4     | 10    | 4     | 1    | 1    |
| SP | Torrinha                | 10.100     | 43    | 15    | 41    | 13    | 4    | 2    |
| SP | Trabiju                 | 1.752      | 8     | 3     | 8     | 3     | 1    | 1    |
| SP | Tremembé                | 48.228     | 204   | 71    | 196   | 62    | 19   | 7    |
| SP | Três Fronteiras         | 5.856      | 25    | 9     | 24    | 8     | 3    | 1    |
| SP | Tuiuti                  | 7.058      | 30    | 11    | 29    | 9     | 3    | 1    |
| SP | Tupã                    | 65.615     | 277   | 96    | 266   | 84    | 25   | 9    |
| SP | Tupi Paulista           | 15.670     | 67    | 23    | 64    | 20    | 6    | 3    |
| SP | Turiúba                 | 2.024      | 9     | 3     | 9     | 3     | 1    | 1    |
| SP | Turmalina               | 1.667      | 8     | 3     | 7     | 3     | 1    | 1    |
| SP | Ubarana                 | 6.488      | 28    | 10    | 27    | 9     | 3    | 1    |
| SP | Ubatuba                 | 92.819     | 392   | 136   | 377   | 119   | 35   | 13   |
| SP | Ubirajara               | 4.828      | 21    | 8     | 20    | 7     | 2    | 1    |
| SP | Uchoa                   | 10.191     | 43    | 15    | 42    | 13    | 4    | 2    |
| SP | União Paulista          | 1.886      | 8     | 3     | 8     | 3     | 1    | 1    |

|    |                          |         |     |     |     |     |    |    |
|----|--------------------------|---------|-----|-----|-----|-----|----|----|
| SP | Urânia                   | 9.125   | 39  | 14  | 37  | 12  | 4  | 2  |
| SP | Uru                      | 1.142   | 5   | 2   | 5   | 2   | 1  | 1  |
| SP | Urupês                   | 13.965  | 59  | 21  | 57  | 18  | 6  | 2  |
| SP | Valentim Gentil          | 13.732  | 58  | 21  | 56  | 18  | 6  | 2  |
| SP | Valinhos                 | 133.169 | 562 | 195 | 540 | 170 | 50 | 18 |
| SP | Valparaíso               | 27.154  | 115 | 40  | 111 | 35  | 11 | 4  |
| SP | Vargem                   | 10.842  | 46  | 16  | 44  | 14  | 5  | 2  |
| SP | Vargem Grande do Sul     | 43.368  | 183 | 64  | 176 | 56  | 17 | 6  |
| SP | Vargem Grande Paulista   | 54.315  | 230 | 80  | 221 | 70  | 21 | 8  |
| SP | Várzea Paulista          | 124.269 | 525 | 182 | 504 | 159 | 47 | 17 |
| SP | Vera Cruz                | 10.804  | 46  | 16  | 44  | 14  | 5  | 2  |
| SP | Vinhedo                  | 81.516  | 344 | 120 | 331 | 104 | 31 | 11 |
| SP | Viradouro                | 19.133  | 81  | 28  | 78  | 25  | 8  | 3  |
| SP | Vista Alegre do Alto     | 9.163   | 39  | 14  | 38  | 12  | 4  | 2  |
| SP | Vitória Brasil           | 1.852   | 8   | 3   | 8   | 3   | 1  | 1  |
| SP | Votorantim               | 124.468 | 526 | 182 | 505 | 159 | 47 | 17 |
| SP | Votuporanga              | 96.106  | 406 | 141 | 390 | 123 | 37 | 13 |
| SP | Zacarias                 | 2.784   | 12  | 5   | 12  | 4   | 2  | 1  |
| SP | Chavantes                | 12.418  | 53  | 19  | 51  | 16  | 5  | 2  |
| SP | Estiva Gerbi             | 11.507  | 49  | 17  | 47  | 15  | 5  | 2  |
| PR | Abatiá                   | 7.360   | 31  | 11  | 30  | 10  | 3  | 1  |
| PR | Adrianópolis             | 5.797   | 24  | 9   | 23  | 8   | 3  | 1  |
| PR | Agudos do Sul            | 9.567   | 40  | 14  | 38  | 12  | 4  | 2  |
| PR | Almirante Tamandaré      | 121.420 | 501 | 174 | 482 | 152 | 45 | 16 |
| PR | Altamira do Paraná       | 1.429   | 6   | 3   | 6   | 2   | 1  | 1  |
| PR | Altônia                  | 22.293  | 92  | 32  | 89  | 28  | 9  | 3  |
| PR | Alto Paraná              | 14.945  | 62  | 22  | 60  | 19  | 6  | 2  |
| PR | Alto Piquiri             | 9.722   | 41  | 14  | 39  | 13  | 4  | 2  |
| PR | Alvorada do Sul          | 11.598  | 48  | 17  | 46  | 15  | 5  | 2  |
| PR | Amaporã                  | 6.405   | 27  | 10  | 26  | 8   | 3  | 1  |
| PR | Ampére                   | 19.466  | 81  | 28  | 78  | 25  | 8  | 3  |
| PR | Anahy                    | 2.774   | 12  | 4   | 11  | 4   | 2  | 1  |
| PR | Andirá                   | 19.823  | 82  | 29  | 79  | 25  | 8  | 3  |
| PR | Ângulo                   | 2.931   | 13  | 5   | 12  | 4   | 2  | 1  |
| PR | Antonina                 | 18.919  | 79  | 28  | 75  | 24  | 7  | 3  |
| PR | Antônio Olinto           | 7.421   | 31  | 11  | 30  | 10  | 3  | 1  |
| PR | Apucarana                | 137.438 | 567 | 197 | 545 | 172 | 51 | 19 |
| PR | Arapongas                | 126.545 | 523 | 181 | 502 | 158 | 47 | 17 |
| PR | Arapoti                  | 28.480  | 118 | 41  | 113 | 36  | 11 | 4  |
| PR | Arapuã                   | 2.951   | 13  | 5   | 12  | 4   | 2  | 1  |
| PR | Araruna                  | 14.029  | 58  | 21  | 56  | 18  | 6  | 2  |
| PR | Araucária                | 148.522 | 613 | 213 | 589 | 185 | 55 | 20 |
| PR | Ariranha do Ivaí         | 2.026   | 9   | 3   | 9   | 3   | 1  | 1  |
| PR | Assaí                    | 14.792  | 62  | 22  | 59  | 19  | 6  | 2  |
| PR | Assis Chateaubriand      | 33.306  | 138 | 48  | 133 | 42  | 13 | 5  |
| PR | Astorga                  | 26.304  | 109 | 38  | 105 | 33  | 10 | 4  |
| PR | Atalaia                  | 3.871   | 16  | 6   | 16  | 5   | 2  | 1  |
| PR | Balsa Nova               | 13.238  | 55  | 19  | 53  | 17  | 5  | 2  |
| PR | Bandeirantes             | 31.061  | 129 | 45  | 124 | 39  | 12 | 5  |
| PR | Barbosa Ferraz           | 11.287  | 47  | 17  | 45  | 15  | 5  | 2  |
| PR | Barracão                 | 10.347  | 43  | 15  | 42  | 13  | 4  | 2  |
| PR | Barra do Jacaré          | 2.781   | 12  | 4   | 12  | 4   | 2  | 1  |
| PR | Bela Vista da Caroba     | 3.404   | 15  | 5   | 14  | 5   | 2  | 1  |
| PR | Bela Vista do Paraíso    | 15.400  | 64  | 22  | 62  | 20  | 6  | 3  |
| PR | Bituruna                 | 16.411  | 68  | 24  | 66  | 21  | 7  | 3  |
| PR | Boa Esperança            | 3.991   | 17  | 6   | 16  | 5   | 2  | 1  |
| PR | Boa Esperança do Iguaçu  | 2.437   | 11  | 4   | 10  | 4   | 1  | 1  |
| PR | Boa Ventura de São Roque | 6.343   | 27  | 10  | 26  | 8   | 3  | 1  |
| PR | Boa Vista da Aparecida   | 7.524   | 32  | 11  | 30  | 10  | 3  | 1  |
| PR | Bocaiúva do Sul          | 13.308  | 55  | 20  | 53  | 17  | 5  | 2  |
| PR | Bom Jesus do Sul         | 3.472   | 15  | 5   | 14  | 5   | 2  | 1  |
| PR | Bom Sucesso              | 7.103   | 30  | 11  | 29  | 9   | 3  | 1  |
| PR | Bom Sucesso do Sul       | 3.244   | 14  | 5   | 13  | 5   | 2  | 1  |
| PR | Borrazópolis             | 6.290   | 26  | 9   | 25  | 8   | 3  | 1  |
| PR | Braganey                 | 5.338   | 23  | 8   | 22  | 7   | 2  | 1  |
| PR | Brasilândia do Sul       | 2.521   | 11  | 4   | 10  | 4   | 1  | 1  |

|    |                          |           |      |      |      |      |     |     |
|----|--------------------------|-----------|------|------|------|------|-----|-----|
| PR | Cafeara                  | 2.973     | 13   | 5    | 12   | 4    | 2   | 1   |
| PR | Cafelândia               | 18.783    | 78   | 27   | 75   | 24   | 7   | 3   |
| PR | Cafezal do Sul           | 3.975     | 17   | 6    | 16   | 5    | 2   | 1   |
| PR | Califórnia               | 8.641     | 36   | 13   | 35   | 11   | 4   | 2   |
| PR | Cambará                  | 25.569    | 106  | 37   | 102  | 32   | 10  | 4   |
| PR | Cambé                    | 108.126   | 447  | 155  | 429  | 135  | 40  | 15  |
| PR | Cambira                  | 7.967     | 33   | 12   | 32   | 10   | 3   | 2   |
| PR | Campina da Lagoa         | 13.888    | 58   | 20   | 56   | 18   | 6   | 2   |
| PR | Campina do Simão         | 3.831     | 16   | 6    | 16   | 5    | 2   | 1   |
| PR | Campina Grande do Sul    | 44.072    | 182  | 63   | 175  | 55   | 17  | 6   |
| PR | Campo Bonito             | 3.694     | 16   | 6    | 15   | 5    | 2   | 1   |
| PR | Campo do Tenente         | 8.118     | 34   | 12   | 33   | 11   | 3   | 2   |
| PR | Campo Largo              | 135.678   | 560  | 194  | 538  | 169  | 50  | 18  |
| PR | Campo Magro              | 30.151    | 125  | 44   | 120  | 38   | 12  | 4   |
| PR | Campo Mourão             | 96.102    | 397  | 138  | 381  | 120  | 36  | 13  |
| PR | Cândido de Abreu         | 14.606    | 61   | 21   | 58   | 19   | 6   | 2   |
| PR | Candói                   | 16.126    | 67   | 24   | 64   | 21   | 6   | 3   |
| PR | Cantagalo                | 13.340    | 56   | 20   | 53   | 17   | 5   | 2   |
| PR | Capanema                 | 19.172    | 80   | 28   | 76   | 24   | 8   | 3   |
| PR | Capitão Leônidas Marques | 15.887    | 66   | 23   | 63   | 20   | 6   | 3   |
| PR | Carambeí                 | 24.225    | 100  | 35   | 97   | 31   | 9   | 4   |
| PR | Carlópolis               | 14.391    | 60   | 21   | 58   | 18   | 6   | 2   |
| PR | Cascavel                 | 336.073   | 1387 | 480  | 1332 | 419  | 124 | 45  |
| PR | Castro                   | 72.125    | 298  | 104  | 286  | 90   | 27  | 10  |
| PR | Catanduvas               | 10.144    | 42   | 15   | 41   | 13   | 4   | 2   |
| PR | Centenário do Sul        | 10.704    | 45   | 16   | 43   | 14   | 4   | 2   |
| PR | Cerro Azul               | 17.884    | 74   | 26   | 71   | 23   | 7   | 3   |
| PR | Céu Azul                 | 11.872    | 49   | 17   | 48   | 15   | 5   | 2   |
| PR | Chopinzinho              | 19.083    | 79   | 28   | 76   | 24   | 7   | 3   |
| PR | Cianorte                 | 84.980    | 351  | 122  | 337  | 106  | 32  | 12  |
| PR | Cidade Gaúcha            | 12.939    | 54   | 19   | 52   | 17   | 5   | 2   |
| PR | Clevelândia              | 16.344    | 68   | 24   | 65   | 21   | 6   | 3   |
| PR | Colombo                  | 249.277   | 1029 | 357  | 988  | 311  | 92  | 33  |
| PR | Colorado                 | 24.271    | 101  | 35   | 97   | 31   | 9   | 4   |
| PR | Congonhinhas             | 8.896     | 37   | 13   | 36   | 12   | 4   | 2   |
| PR | Conselheiro Mairinck     | 3.891     | 17   | 6    | 16   | 5    | 2   | 1   |
| PR | Contenda                 | 19.082    | 79   | 28   | 76   | 24   | 7   | 3   |
| PR | Corbélia                 | 17.162    | 71   | 25   | 69   | 22   | 7   | 3   |
| PR | Cornélio Procopio        | 47.840    | 198  | 69   | 190  | 60   | 18  | 7   |
| PR | Coronel Domingos Soares  | 7.538     | 32   | 11   | 30   | 10   | 3   | 1   |
| PR | Coronel Vivida           | 20.430    | 85   | 30   | 81   | 26   | 8   | 3   |
| PR | Corumbataí do Sul        | 3.038     | 13   | 5    | 13   | 4    | 2   | 1   |
| PR | Cruzeiro do Iguaçu       | 4.229     | 18   | 7    | 17   | 6    | 2   | 1   |
| PR | Cruzeiro do Oeste        | 20.962    | 87   | 30   | 84   | 27   | 8   | 3   |
| PR | Cruzeiro do Sul          | 4.430     | 19   | 7    | 18   | 6    | 2   | 1   |
| PR | Cruz Machado             | 18.772    | 78   | 27   | 75   | 24   | 7   | 3   |
| PR | Cruzmaltina              | 2.892     | 12   | 5    | 12   | 4    | 2   | 1   |
| PR | Curitiba                 | 1.963.726 | 8101 | 2805 | 7783 | 2445 | 720 | 259 |
| PR | Curiúva                  | 15.289    | 64   | 22   | 61   | 20   | 6   | 3   |
| PR | Diamante do Norte        | 4.975     | 21   | 8    | 20   | 7    | 2   | 1   |
| PR | Diamante do Sul          | 3.409     | 15   | 5    | 14   | 5    | 2   | 1   |
| PR | Diamante D'Oeste         | 5.279     | 22   | 8    | 21   | 7    | 2   | 1   |
| PR | Dois Vizinhos            | 41.424    | 171  | 60   | 165  | 52   | 16  | 6   |
| PR | Douradina                | 8.988     | 38   | 13   | 36   | 12   | 4   | 2   |
| PR | Doutor Camargo           | 5.987     | 25   | 9    | 24   | 8    | 3   | 1   |
| PR | Enéas Marques            | 5.906     | 25   | 9    | 24   | 8    | 3   | 1   |
| PR | Engenheiro Beltrão       | 13.962    | 58   | 20   | 56   | 18   | 6   | 2   |
| PR | Esperança Nova           | 1.633     | 7    | 3    | 7    | 3    | 1   | 1   |
| PR | Entre Rios do Oeste      | 4.651     | 20   | 7    | 19   | 6    | 2   | 1   |
| PR | Espigão Alto do Iguaçu   | 3.980     | 17   | 6    | 16   | 5    | 2   | 1   |
| PR | Farol                    | 2.995     | 13   | 5    | 12   | 4    | 2   | 1   |
| PR | Faxinal                  | 17.379    | 72   | 25   | 69   | 22   | 7   | 3   |
| PR | Fazenda Rio Grande       | 103.750   | 428  | 149  | 412  | 130  | 39  | 14  |
| PR | Fênix                    | 4.734     | 20   | 7    | 19   | 6    | 2   | 1   |
| PR | Fernandes Pinheiro       | 5.561     | 23   | 8    | 23   | 7    | 3   | 1   |
| PR | Figueira                 | 7.625     | 32   | 11   | 31   | 10   | 3   | 2   |

|    |                      |         |      |     |      |     |    |    |
|----|----------------------|---------|------|-----|------|-----|----|----|
| PR | Floraí               | 4.883   | 21   | 7   | 20   | 7   | 2  | 1  |
| PR | Flor da Serra do Sul | 4.583   | 19   | 7   | 19   | 6   | 2  | 1  |
| PR | Floresta             | 6.926   | 29   | 10  | 28   | 9   | 3  | 1  |
| PR | Florestópolis        | 10.360  | 43   | 15  | 42   | 13  | 4  | 2  |
| PR | Flórida              | 2.709   | 12   | 4   | 11   | 4   | 1  | 1  |
| PR | Formosa do Oeste     | 6.345   | 27   | 10  | 26   | 8   | 3  | 1  |
| PR | Foz do Iguaçu        | 257.971 | 1065 | 369 | 1023 | 322 | 95 | 34 |
| PR | Francisco Alves      | 5.942   | 25   | 9   | 24   | 8   | 3  | 1  |
| PR | Francisco Beltrão    | 93.308  | 385  | 134 | 370  | 117 | 35 | 13 |
| PR | Foz do Jordão        | 4.466   | 19   | 7   | 18   | 6   | 2  | 1  |
| PR | General Carneiro     | 13.661  | 57   | 20  | 55   | 18  | 6  | 2  |
| PR | Godoy Moreira        | 2.850   | 12   | 5   | 12   | 4   | 2  | 1  |
| PR | Goioerê              | 28.734  | 119  | 42  | 114  | 36  | 11 | 4  |
| PR | Goioxim              | 6.997   | 29   | 10  | 28   | 9   | 3  | 1  |
| PR | Grandes Rios         | 5.379   | 23   | 8   | 22   | 7   | 2  | 1  |
| PR | Guaíra               | 33.497  | 139  | 48  | 133  | 42  | 13 | 5  |
| PR | Guairaçá             | 6.635   | 28   | 10  | 27   | 9   | 3  | 1  |
| PR | Guamiranga           | 8.881   | 37   | 13  | 36   | 12  | 4  | 2  |
| PR | Guapirama            | 3.767   | 16   | 6   | 15   | 5   | 2  | 1  |
| PR | Guaporema            | 2.239   | 10   | 4   | 9    | 3   | 1  | 1  |
| PR | Guaraci              | 5.557   | 23   | 8   | 23   | 7   | 3  | 1  |
| PR | Guaraniaçu           | 11.969  | 50   | 18  | 48   | 15  | 5  | 2  |
| PR | Guarapuava           | 183.755 | 759  | 263 | 729  | 229 | 68 | 25 |
| PR | Guaracueçaba         | 7.554   | 32   | 11  | 30   | 10  | 3  | 1  |
| PR | Guaratuba            | 37.974  | 157  | 55  | 151  | 48  | 14 | 5  |
| PR | Honório Serpa        | 5.030   | 21   | 8   | 20   | 7   | 2  | 1  |
| PR | Ibaiti               | 31.854  | 132  | 46  | 127  | 40  | 12 | 5  |
| PR | Ibema                | 6.387   | 27   | 10  | 26   | 8   | 3  | 1  |
| PR | Ibiporã              | 55.688  | 230  | 80  | 221  | 70  | 21 | 8  |
| PR | Icaraima             | 7.671   | 32   | 11  | 31   | 10  | 3  | 2  |
| PR | Iguaraçu             | 4.475   | 19   | 7   | 18   | 6   | 2  | 1  |
| PR | Iguatu               | 2.251   | 10   | 4   | 9    | 3   | 1  | 1  |
| PR | Imbaú                | 13.449  | 56   | 20  | 54   | 17  | 5  | 2  |
| PR | Imbituva             | 33.306  | 138  | 48  | 133  | 42  | 13 | 5  |
| PR | Inácio Martins       | 11.117  | 46   | 16  | 45   | 14  | 5  | 2  |
| PR | Inajá                | 3.122   | 13   | 5   | 13   | 4   | 2  | 1  |
| PR | Indianópolis         | 4.472   | 19   | 7   | 18   | 6   | 2  | 1  |
| PR | Ipiranga             | 15.327  | 64   | 22  | 61   | 20  | 6  | 3  |
| PR | Iporã                | 13.642  | 57   | 20  | 55   | 17  | 5  | 2  |
| PR | Iracema do Oeste     | 2.216   | 10   | 4   | 9    | 3   | 1  | 1  |
| PR | Irati                | 61.439  | 254  | 88  | 244  | 77  | 23 | 9  |
| PR | Iretama              | 10.029  | 42   | 15  | 40   | 13  | 4  | 2  |
| PR | Itaguajé             | 4.426   | 19   | 7   | 18   | 6   | 2  | 1  |
| PR | Itaipulândia         | 11.588  | 48   | 17  | 46   | 15  | 5  | 2  |
| PR | Itambaracá           | 6.516   | 27   | 10  | 26   | 9   | 3  | 1  |
| PR | Itambé               | 6.110   | 26   | 9   | 25   | 8   | 3  | 1  |
| PR | Itapejara d'Oeste    | 12.220  | 51   | 18  | 49   | 16  | 5  | 2  |
| PR | Itaperuçu            | 29.493  | 122  | 43  | 117  | 37  | 11 | 4  |
| PR | Itaúna do Sul        | 2.700   | 12   | 4   | 11   | 4   | 1  | 1  |
| PR | Ivaí                 | 14.049  | 58   | 21  | 56   | 18  | 6  | 2  |
| PR | Ivaiporã             | 31.886  | 132  | 46  | 127  | 40  | 12 | 5  |
| PR | Ivaté                | 8.294   | 35   | 12  | 33   | 11  | 4  | 2  |
| PR | Ivatuba              | 3.299   | 14   | 5   | 14   | 5   | 2  | 1  |
| PR | Jaboti               | 5.332   | 22   | 8   | 22   | 7   | 2  | 1  |
| PR | Jacarezinho          | 39.268  | 162  | 57  | 156  | 49  | 15 | 6  |
| PR | Jaguapitã            | 13.861  | 58   | 20  | 55   | 18  | 6  | 2  |
| PR | Jaguariaíva          | 35.192  | 146  | 51  | 140  | 44  | 13 | 5  |
| PR | Jandaia do Sul       | 21.281  | 88   | 31  | 85   | 27  | 8  | 3  |
| PR | Janiópolis           | 4.948   | 21   | 8   | 20   | 7   | 2  | 1  |
| PR | Japira               | 4.929   | 21   | 8   | 20   | 7   | 2  | 1  |
| PR | Japurá               | 9.573   | 40   | 14  | 38   | 12  | 4  | 2  |
| PR | Jardim Alegre        | 11.067  | 46   | 16  | 44   | 14  | 5  | 2  |
| PR | Jardim Olinda        | 1.309   | 6    | 2   | 6    | 2   | 1  | 1  |
| PR | Jataizinho           | 12.687  | 53   | 19  | 51   | 16  | 5  | 2  |
| PR | Jesuítas             | 8.251   | 35   | 12  | 33   | 11  | 4  | 2  |
| PR | Joaquim Távora       | 12.108  | 50   | 18  | 48   | 16  | 5  | 2  |

|    |                            |         |      |     |      |     |     |    |
|----|----------------------------|---------|------|-----|------|-----|-----|----|
| PR | Jundiá do Sul              | 3.248   | 14   | 5   | 13   | 5   | 2   | 1  |
| PR | Juranda                    | 7.244   | 30   | 11  | 29   | 10  | 3   | 1  |
| PR | Jussara                    | 7.069   | 30   | 11  | 29   | 9   | 3   | 1  |
| PR | Kaloré                     | 3.996   | 17   | 6   | 16   | 5   | 2   | 1  |
| PR | Lapa                       | 48.651  | 201  | 70  | 193  | 61  | 18  | 7  |
| PR | Laranjal                   | 5.719   | 24   | 9   | 23   | 8   | 3   | 1  |
| PR | Laranjeiras do Sul         | 32.167  | 133  | 46  | 128  | 41  | 12  | 5  |
| PR | Leópolis                   | 3.896   | 17   | 6   | 16   | 5   | 2   | 1  |
| PR | Lidianópolis               | 3.155   | 14   | 5   | 13   | 4   | 2   | 1  |
| PR | Lindoeste                  | 4.488   | 19   | 7   | 18   | 6   | 2   | 1  |
| PR | Loanda                     | 23.393  | 97   | 34  | 93   | 30  | 9   | 4  |
| PR | Lobato                     | 4.850   | 21   | 7   | 20   | 7   | 2   | 1  |
| PR | Londrina                   | 580.870 | 2397 | 830 | 2303 | 723 | 213 | 77 |
| PR | Luiziana                   | 7.217   | 30   | 11  | 29   | 9   | 3   | 1  |
| PR | Lunardelli                 | 4.695   | 20   | 7   | 19   | 6   | 2   | 1  |
| PR | Lupionópolis               | 4.969   | 21   | 8   | 20   | 7   | 2   | 1  |
| PR | Mallet                     | 13.697  | 57   | 20  | 55   | 18  | 6   | 2  |
| PR | Mamborê                    | 12.900  | 54   | 19  | 52   | 17  | 5   | 2  |
| PR | Mandaguaçu                 | 23.373  | 97   | 34  | 93   | 30  | 9   | 4  |
| PR | Mandaguari                 | 34.628  | 143  | 50  | 138  | 44  | 13  | 5  |
| PR | Mandirituba                | 27.750  | 115  | 40  | 110  | 35  | 11  | 4  |
| PR | Manfrinópolis              | 2.442   | 11   | 4   | 10   | 4   | 1   | 1  |
| PR | Mangueirinha               | 16.572  | 69   | 24  | 66   | 21  | 7   | 3  |
| PR | Manoel Ribas               | 13.517  | 56   | 20  | 54   | 17  | 5   | 2  |
| PR | Marechal Cândido Rondon    | 54.031  | 223  | 78  | 215  | 68  | 20  | 8  |
| PR | Maria Helena               | 5.593   | 24   | 8   | 23   | 7   | 3   | 1  |
| PR | Mariaiva                   | 36.103  | 149  | 52  | 144  | 45  | 14  | 5  |
| PR | Marilândia do Sul          | 8.793   | 37   | 13  | 35   | 11  | 4   | 2  |
| PR | Marilena                   | 7.093   | 30   | 11  | 29   | 9   | 3   | 1  |
| PR | Mariluz                    | 10.327  | 43   | 15  | 41   | 13  | 4   | 2  |
| PR | Maringá                    | 436.472 | 1801 | 624 | 1730 | 544 | 160 | 58 |
| PR | Mariópolis                 | 6.655   | 28   | 10  | 27   | 9   | 3   | 1  |
| PR | Maripá                     | 5.562   | 23   | 8   | 23   | 7   | 3   | 1  |
| PR | Marmeleiro                 | 14.407  | 60   | 21  | 58   | 18  | 6   | 2  |
| PR | Marquinho                  | 4.283   | 18   | 7   | 17   | 6   | 2   | 1  |
| PR | Marumbi                    | 4.676   | 20   | 7   | 19   | 6   | 2   | 1  |
| PR | Matelândia                 | 18.266  | 76   | 27  | 73   | 23  | 7   | 3  |
| PR | Matinhos                   | 35.705  | 148  | 51  | 142  | 45  | 14  | 5  |
| PR | Mato Rico                  | 3.142   | 13   | 5   | 13   | 4   | 2   | 1  |
| PR | Mauá da Serra              | 10.994  | 46   | 16  | 44   | 14  | 5   | 2  |
| PR | Medianeira                 | 46.940  | 194  | 68  | 187  | 59  | 18  | 7  |
| PR | Mercedes                   | 5.617   | 24   | 9   | 23   | 7   | 3   | 1  |
| PR | Mirador                    | 2.180   | 9    | 4   | 9    | 3   | 1   | 1  |
| PR | Miraselva                  | 1.786   | 8    | 3   | 8    | 3   | 1   | 1  |
| PR | Missal                     | 10.706  | 45   | 16  | 43   | 14  | 4   | 2  |
| PR | Moreira Sales              | 11.966  | 50   | 18  | 48   | 15  | 5   | 2  |
| PR | Morretes                   | 16.485  | 69   | 24  | 66   | 21  | 7   | 3  |
| PR | Munhoz de Melo             | 4.034   | 17   | 6   | 16   | 6   | 2   | 1  |
| PR | Nossa Senhora das Graças   | 4.009   | 17   | 6   | 16   | 5   | 2   | 1  |
| PR | Nova Aliança do Ivaí       | 1.560   | 7    | 3   | 7    | 2   | 1   | 1  |
| PR | Nova América da Colina     | 3.424   | 15   | 5   | 14   | 5   | 2   | 1  |
| PR | Nova Aurora                | 10.131  | 42   | 15  | 41   | 13  | 4   | 2  |
| PR | Nova Cantu                 | 4.827   | 20   | 7   | 20   | 7   | 2   | 1  |
| PR | Nova Esperança             | 28.062  | 116  | 41  | 112  | 35  | 11  | 4  |
| PR | Nova Esperança do Sudoeste | 5.014   | 21   | 8   | 20   | 7   | 2   | 1  |
| PR | Nova Fátima                | 8.120   | 34   | 12  | 33   | 11  | 3   | 2  |
| PR | Nova Laranjeiras           | 11.462  | 48   | 17  | 46   | 15  | 5   | 2  |
| PR | Nova Londrina              | 13.188  | 55   | 19  | 53   | 17  | 5   | 2  |
| PR | Nova Olímpia               | 5.846   | 25   | 9   | 24   | 8   | 3   | 1  |
| PR | Nova Santa Bárbara         | 4.304   | 18   | 7   | 18   | 6   | 2   | 1  |
| PR | Nova Santa Rosa            | 8.311   | 35   | 12  | 33   | 11  | 4   | 2  |
| PR | Nova Prata do Iguaçu       | 10.540  | 44   | 16  | 42   | 14  | 4   | 2  |
| PR | Nova Tebas                 | 5.252   | 22   | 8   | 21   | 7   | 2   | 1  |
| PR | Novo Itacolomi             | 2.836   | 12   | 5   | 12   | 4   | 2   | 1  |
| PR | Ortigueira                 | 21.783  | 90   | 32  | 87   | 28  | 8   | 3  |
| PR | Ourizona                   | 3.423   | 15   | 5   | 14   | 5   | 2   | 1  |

|    |                           |         |      |     |      |     |     |    |
|----|---------------------------|---------|------|-----|------|-----|-----|----|
| PR | Ouro Verde do Oeste       | 6.036   | 25   | 9   | 24   | 8   | 3   | 1  |
| PR | Paiçandu                  | 42.251  | 175  | 61  | 168  | 53  | 16  | 6  |
| PR | Palmas                    | 52.503  | 217  | 75  | 209  | 66  | 20  | 7  |
| PR | Palmeira                  | 34.109  | 141  | 49  | 136  | 43  | 13  | 5  |
| PR | Palmital                  | 12.755  | 53   | 19  | 51   | 16  | 5   | 2  |
| PR | Palotina                  | 32.389  | 134  | 47  | 129  | 41  | 12  | 5  |
| PR | Paraíso do Norte          | 14.211  | 59   | 21  | 57   | 18  | 6   | 2  |
| PR | Paranacity                | 11.685  | 49   | 17  | 47   | 15  | 5   | 2  |
| PR | Paranaguá                 | 157.378 | 650  | 225 | 624  | 196 | 58  | 21 |
| PR | Paranapoema               | 3.277   | 14   | 5   | 13   | 5   | 2   | 1  |
| PR | Paranavaí                 | 89.454  | 370  | 128 | 355  | 112 | 33  | 12 |
| PR | Pato Bragado              | 5.755   | 24   | 9   | 23   | 8   | 3   | 1  |
| PR | Pato Branco               | 84.779  | 350  | 122 | 337  | 106 | 32  | 12 |
| PR | Paula Freitas             | 5.942   | 25   | 9   | 24   | 8   | 3   | 1  |
| PR | Paulo Frontin             | 7.418   | 31   | 11  | 30   | 10  | 3   | 1  |
| PR | Peabiru                   | 14.017  | 58   | 21  | 56   | 18  | 6   | 2  |
| PR | Perobal                   | 6.194   | 26   | 9   | 25   | 8   | 3   | 1  |
| PR | Pérola                    | 11.406  | 48   | 17  | 46   | 15  | 5   | 2  |
| PR | Pérola d'Oeste            | 6.232   | 26   | 9   | 25   | 8   | 3   | 1  |
| PR | Piên                      | 13.015  | 54   | 19  | 52   | 17  | 5   | 2  |
| PR | Pinhais                   | 134.788 | 557  | 193 | 535  | 168 | 50  | 18 |
| PR | Pinhalão                  | 6.323   | 27   | 10  | 26   | 8   | 3   | 1  |
| PR | Pinhal de São Bento       | 2.742   | 12   | 4   | 11   | 4   | 2   | 1  |
| PR | Pinhão                    | 32.722  | 135  | 47  | 130  | 41  | 12  | 5  |
| PR | Piraí do Sul              | 25.779  | 107  | 37  | 103  | 33  | 10  | 4  |
| PR | Piraquara                 | 116.852 | 483  | 167 | 464  | 146 | 43  | 16 |
| PR | Pitanga                   | 29.686  | 123  | 43  | 118  | 37  | 11  | 4  |
| PR | Pitangueiras              | 3.298   | 14   | 5   | 14   | 5   | 2   | 1  |
| PR | Planaltina do Paraná      | 4.281   | 18   | 7   | 17   | 6   | 2   | 1  |
| PR | Planalto                  | 13.385  | 56   | 20  | 54   | 17  | 5   | 2  |
| PR | Ponta Grossa              | 358.838 | 1481 | 513 | 1423 | 447 | 132 | 48 |
| PR | Pontal do Paraná          | 28.529  | 118  | 41  | 114  | 36  | 11  | 4  |
| PR | Porecatu                  | 12.587  | 52   | 18  | 50   | 16  | 5   | 2  |
| PR | Porto Amazonas            | 4.899   | 21   | 7   | 20   | 7   | 2   | 1  |
| PR | Porto Barreiro            | 3.133   | 13   | 5   | 13   | 4   | 2   | 1  |
| PR | Porto Rico                | 2.554   | 11   | 4   | 11   | 4   | 1   | 1  |
| PR | Porto Vitória             | 4.057   | 17   | 6   | 17   | 6   | 2   | 1  |
| PR | Prado Ferreira            | 3.806   | 16   | 6   | 16   | 5   | 2   | 1  |
| PR | Pranchita                 | 5.035   | 21   | 8   | 20   | 7   | 2   | 1  |
| PR | Presidente Castelo Branco | 5.395   | 23   | 8   | 22   | 7   | 2   | 1  |
| PR | Primeiro de Maio          | 11.138  | 46   | 16  | 45   | 14  | 5   | 2  |
| PR | Prudentópolis             | 52.776  | 218  | 76  | 210  | 66  | 20  | 7  |
| PR | Quarto Centenário         | 4.420   | 19   | 7   | 18   | 6   | 2   | 1  |
| PR | Quatiguá                  | 7.504   | 31   | 11  | 30   | 10  | 3   | 1  |
| PR | Quatro Barras             | 24.253  | 101  | 35  | 97   | 31  | 9   | 4  |
| PR | Quatro Pontes             | 4.043   | 17   | 6   | 17   | 6   | 2   | 1  |
| PR | Quedas do Iguaçu          | 34.707  | 144  | 50  | 138  | 44  | 13  | 5  |
| PR | Querência do Norte        | 12.257  | 51   | 18  | 49   | 16  | 5   | 2  |
| PR | Quinta do Sol             | 4.444   | 19   | 7   | 18   | 6   | 2   | 1  |
| PR | Quitandinha               | 19.388  | 80   | 28  | 77   | 25  | 8   | 3  |
| PR | Ramilândia                | 4.500   | 19   | 7   | 18   | 6   | 2   | 1  |
| PR | Rancho Alegre             | 3.760   | 16   | 6   | 15   | 5   | 2   | 1  |
| PR | Rancho Alegre D'Oeste     | 2.602   | 11   | 4   | 11   | 4   | 1   | 1  |
| PR | Realeza                   | 16.976  | 71   | 25  | 68   | 22  | 7   | 3  |
| PR | Rebouças                  | 14.991  | 62   | 22  | 60   | 19  | 6   | 2  |
| PR | Renascença                | 6.772   | 28   | 10  | 27   | 9   | 3   | 1  |
| PR | Reserva                   | 26.933  | 112  | 39  | 107  | 34  | 10  | 4  |
| PR | Reserva do Iguaçu         | 8.127   | 34   | 12  | 33   | 11  | 3   | 2  |
| PR | Ribeirão Claro            | 10.622  | 44   | 16  | 43   | 14  | 4   | 2  |
| PR | Ribeirão do Pinhal        | 12.869  | 54   | 19  | 52   | 17  | 5   | 2  |
| PR | Rio Azul                  | 15.433  | 64   | 23  | 62   | 20  | 6   | 3  |
| PR | Rio Bom                   | 3.162   | 14   | 5   | 13   | 4   | 2   | 1  |
| PR | Rio Bonito do Iguaçu      | 13.240  | 55   | 19  | 53   | 17  | 5   | 2  |
| PR | Rio Branco do Ivaí        | 4.121   | 17   | 6   | 17   | 6   | 2   | 1  |
| PR | Rio Branco do Sul         | 32.635  | 135  | 47  | 130  | 41  | 12  | 5  |
| PR | Rio Negro                 | 34.645  | 143  | 50  | 138  | 44  | 13  | 5  |



|    |                           |         |      |     |      |     |     |    |
|----|---------------------------|---------|------|-----|------|-----|-----|----|
| PR | Rolândia                  | 68.165  | 282  | 98  | 271  | 85  | 25  | 9  |
| PR | Roncador                  | 9.447   | 39   | 14  | 38   | 12  | 4   | 2  |
| PR | Rondon                    | 9.664   | 40   | 14  | 39   | 13  | 4   | 2  |
| PR | Rosário do Ivaí           | 4.595   | 19   | 7   | 19   | 6   | 2   | 1  |
| PR | Sabáudia                  | 6.954   | 29   | 10  | 28   | 9   | 3   | 1  |
| PR | Salgado Filho             | 3.389   | 14   | 5   | 14   | 5   | 2   | 1  |
| PR | Salto do Itararé          | 4.862   | 21   | 7   | 20   | 7   | 2   | 1  |
| PR | Salto do Lontra           | 14.957  | 62   | 22  | 60   | 19  | 6   | 2  |
| PR | Santa Amélia              | 3.208   | 14   | 5   | 13   | 4   | 2   | 1  |
| PR | Santa Cecília do Pavão    | 3.253   | 14   | 5   | 13   | 5   | 2   | 1  |
| PR | Santa Cruz de Monte Caste | 7.705   | 32   | 12  | 31   | 10  | 3   | 2  |
| PR | Santa Fé                  | 12.330  | 51   | 18  | 49   | 16  | 5   | 2  |
| PR | Santa Helena              | 27.036  | 112  | 39  | 108  | 34  | 10  | 4  |
| PR | Santa Inês                | 1.568   | 7    | 3   | 7    | 2   | 1   | 1  |
| PR | Santa Isabel do Ivaí      | 8.484   | 35   | 13  | 34   | 11  | 4   | 2  |
| PR | Santa Izabel do Oeste     | 14.924  | 62   | 22  | 60   | 19  | 6   | 2  |
| PR | Santa Lúcia               | 3.795   | 16   | 6   | 16   | 5   | 2   | 1  |
| PR | Santa Maria do Oeste      | 9.210   | 38   | 14  | 37   | 12  | 4   | 2  |
| PR | Santa Mariana             | 11.523  | 48   | 17  | 46   | 15  | 5   | 2  |
| PR | Santa Mônica              | 4.052   | 17   | 6   | 17   | 6   | 2   | 1  |
| PR | Santana do Itararé        | 4.916   | 21   | 8   | 20   | 7   | 2   | 1  |
| PR | Santa Tereza do Oeste     | 10.055  | 42   | 15  | 40   | 13  | 4   | 2  |
| PR | Santa Terezinha de Itaipu | 23.927  | 99   | 35  | 95   | 30  | 9   | 4  |
| PR | Santo Antônio da Platina  | 46.503  | 192  | 67  | 185  | 58  | 18  | 7  |
| PR | Santo Antônio do Caiuá    | 2.611   | 11   | 4   | 11   | 4   | 1   | 1  |
| PR | Santo Antônio do Paraíso  | 2.032   | 9    | 3   | 9    | 3   | 1   | 1  |
| PR | Santo Antônio do Sudoeste | 20.354  | 84   | 30  | 81   | 26  | 8   | 3  |
| PR | Santo Inácio              | 5.422   | 23   | 8   | 22   | 7   | 2   | 1  |
| PR | São Carlos do Ivaí        | 6.961   | 29   | 10  | 28   | 9   | 3   | 1  |
| PR | São Jerônimo da Serra     | 11.088  | 46   | 16  | 44   | 14  | 5   | 2  |
| PR | São João                  | 10.122  | 42   | 15  | 41   | 13  | 4   | 2  |
| PR | São João do Caiuá         | 5.819   | 25   | 9   | 24   | 8   | 3   | 1  |
| PR | São João do Ivaí          | 9.897   | 41   | 15  | 40   | 13  | 4   | 2  |
| PR | São João do Triunfo       | 15.359  | 64   | 22  | 61   | 20  | 6   | 3  |
| PR | São Jorge d'Oeste         | 9.005   | 38   | 13  | 36   | 12  | 4   | 2  |
| PR | São Jorge do Ivaí         | 5.535   | 23   | 8   | 22   | 7   | 3   | 1  |
| PR | São Jorge do Patrocínio   | 5.532   | 23   | 8   | 22   | 7   | 3   | 1  |
| PR | São José da Boa Vista     | 6.115   | 26   | 9   | 25   | 8   | 3   | 1  |
| PR | São José das Palmeiras    | 3.601   | 15   | 6   | 15   | 5   | 2   | 1  |
| PR | São José dos Pinhais      | 334.620 | 1381 | 478 | 1327 | 417 | 123 | 45 |
| PR | São Manoel do Paraná      | 2.165   | 9    | 4   | 9    | 3   | 1   | 1  |
| PR | São Mateus do Sul         | 47.137  | 195  | 68  | 187  | 59  | 18  | 7  |
| PR | São Miguel do Iguaçu      | 27.696  | 115  | 40  | 110  | 35  | 11  | 4  |
| PR | São Pedro do Iguaçu       | 5.745   | 24   | 9   | 23   | 8   | 3   | 1  |
| PR | São Pedro do Ivaí         | 11.109  | 46   | 16  | 45   | 14  | 5   | 2  |
| PR | São Pedro do Paraná       | 2.265   | 10   | 4   | 9    | 3   | 1   | 1  |
| PR | São Sebastião da Amoreira | 8.865   | 37   | 13  | 36   | 12  | 4   | 2  |
| PR | São Tomé                  | 5.778   | 24   | 9   | 23   | 8   | 3   | 1  |
| PR | Sapopema                  | 6.708   | 28   | 10  | 27   | 9   | 3   | 1  |
| PR | Sarandi                   | 98.888  | 408  | 142 | 392  | 124 | 37  | 14 |
| PR | Saudade do Iguaçu         | 5.578   | 24   | 8   | 23   | 7   | 3   | 1  |
| PR | Sengés                    | 19.441  | 81   | 28  | 78   | 25  | 8   | 3  |
| PR | Serranópolis do Iguaçu    | 4.460   | 19   | 7   | 18   | 6   | 2   | 1  |
| PR | Sertaneja                 | 5.149   | 22   | 8   | 21   | 7   | 2   | 1  |
| PR | Sertanópolis              | 16.456  | 68   | 24  | 66   | 21  | 7   | 3  |
| PR | Siqueira Campos           | 21.476  | 89   | 31  | 86   | 27  | 8   | 3  |
| PR | Sulina                    | 2.880   | 12   | 5   | 12   | 4   | 2   | 1  |
| PR | Tamarana                  | 15.277  | 64   | 22  | 61   | 20  | 6   | 3  |
| PR | Tamboara                  | 5.196   | 22   | 8   | 21   | 7   | 2   | 1  |
| PR | Tapejara                  | 16.480  | 68   | 24  | 66   | 21  | 7   | 3  |
| PR | Tapira                    | 5.452   | 23   | 8   | 22   | 7   | 2   | 1  |
| PR | Teixeira Soares           | 12.761  | 53   | 19  | 51   | 16  | 5   | 2  |
| PR | Telêmaco Borba            | 80.588  | 333  | 116 | 320  | 101 | 30  | 11 |
| PR | Terra Boa                 | 17.304  | 72   | 25  | 69   | 22  | 7   | 3  |
| PR | Terra Rica                | 17.054  | 71   | 25  | 68   | 22  | 7   | 3  |
| PR | Terra Roxa                | 17.562  | 73   | 26  | 70   | 22  | 7   | 3  |

|    |                           |         |      |     |      |     |     |    |
|----|---------------------------|---------|------|-----|------|-----|-----|----|
| PR | Tibagi                    | 20.688  | 86   | 30  | 82   | 26  | 8   | 3  |
| PR | Tijucas do Sul            | 17.295  | 72   | 25  | 69   | 22  | 7   | 3  |
| PR | Toledo                    | 144.601 | 597  | 207 | 574  | 180 | 53  | 20 |
| PR | Tomazina                  | 7.699   | 32   | 11  | 31   | 10  | 3   | 2  |
| PR | Três Barras do Paraná     | 12.036  | 50   | 18  | 48   | 15  | 5   | 2  |
| PR | Tunas do Paraná           | 9.269   | 39   | 14  | 37   | 12  | 4   | 2  |
| PR | Tuneiras do Oeste         | 8.502   | 36   | 13  | 34   | 11  | 4   | 2  |
| PR | Tupãssi                   | 8.105   | 34   | 12  | 33   | 11  | 3   | 2  |
| PR | Turvo                     | 12.977  | 54   | 19  | 52   | 17  | 5   | 2  |
| PR | Ubiratã                   | 20.809  | 86   | 30  | 83   | 26  | 8   | 3  |
| PR | Umuarama                  | 113.416 | 468  | 162 | 450  | 142 | 42  | 15 |
| PR | União da Vitória          | 58.298  | 241  | 84  | 232  | 73  | 22  | 8  |
| PR | Uniflor                   | 2.623   | 11   | 4   | 11   | 4   | 1   | 1  |
| PR | Uraí                      | 11.233  | 47   | 17  | 45   | 14  | 5   | 2  |
| PR | Wenceslau Braz            | 19.358  | 80   | 28  | 77   | 25  | 8   | 3  |
| PR | Ventania                  | 12.267  | 51   | 18  | 49   | 16  | 5   | 2  |
| PR | Vera Cruz do Oeste        | 8.389   | 35   | 12  | 34   | 11  | 4   | 2  |
| PR | Verê                      | 7.094   | 30   | 11  | 29   | 9   | 3   | 1  |
| PR | Alto Paraíso              | 2.630   | 11   | 4   | 11   | 4   | 1   | 1  |
| PR | Doutor Ulysses            | 5.525   | 23   | 8   | 22   | 7   | 3   | 1  |
| PR | Virmond                   | 4.051   | 17   | 6   | 17   | 6   | 2   | 1  |
| PR | Vitorino                  | 6.879   | 29   | 10  | 28   | 9   | 3   | 1  |
| PR | Xambê                     | 5.584   | 24   | 8   | 23   | 7   | 3   | 1  |
| SC | Abdon Batista             | 2.534   | 11   | 4   | 11   | 4   | 1   | 1  |
| SC | Abelardo Luz              | 18.015  | 77   | 27  | 74   | 24  | 7   | 3  |
| SC | Agrolândia                | 11.160  | 48   | 17  | 46   | 15  | 5   | 2  |
| SC | Agronômica                | 5.570   | 24   | 9   | 23   | 8   | 3   | 1  |
| SC | Água Doce                 | 7.160   | 31   | 11  | 30   | 10  | 3   | 1  |
| SC | Águas de Chapecó          | 6.544   | 28   | 10  | 27   | 9   | 3   | 1  |
| SC | Águas Frias               | 2.341   | 10   | 4   | 10   | 3   | 1   | 1  |
| SC | Águas Mornas              | 6.646   | 29   | 10  | 28   | 9   | 3   | 1  |
| SC | Alfredo Wagner            | 10.136  | 44   | 15  | 42   | 13  | 4   | 2  |
| SC | Alto Bela Vista           | 1.915   | 9    | 3   | 8    | 3   | 1   | 1  |
| SC | Anchieta                  | 5.477   | 24   | 9   | 23   | 8   | 3   | 1  |
| SC | Angelina                  | 4.686   | 20   | 7   | 20   | 6   | 2   | 1  |
| SC | Anita Garibaldi           | 6.783   | 29   | 10  | 28   | 9   | 3   | 1  |
| SC | Anitápolis                | 3.223   | 14   | 5   | 14   | 5   | 2   | 1  |
| SC | Antônio Carlos            | 8.712   | 37   | 13  | 36   | 12  | 4   | 2  |
| SC | Apiúna                    | 10.951  | 47   | 17  | 45   | 15  | 5   | 2  |
| SC | Arabutã                   | 4.268   | 19   | 7   | 18   | 6   | 2   | 1  |
| SC | Araquari                  | 40.890  | 174  | 61  | 167  | 53  | 16  | 6  |
| SC | Araranguá                 | 69.493  | 295  | 103 | 284  | 89  | 27  | 10 |
| SC | Armazém                   | 8.843   | 38   | 13  | 37   | 12  | 4   | 2  |
| SC | Arroio Trinta             | 3.547   | 16   | 6   | 15   | 5   | 2   | 1  |
| SC | Arvoredo                  | 2.228   | 10   | 4   | 10   | 3   | 1   | 1  |
| SC | Ascurra                   | 8.021   | 35   | 12  | 33   | 11  | 4   | 2  |
| SC | Atalanta                  | 3.179   | 14   | 5   | 13   | 5   | 2   | 1  |
| SC | Aurora                    | 5.687   | 25   | 9   | 24   | 8   | 3   | 1  |
| SC | Balneário Arroio do Silva | 13.782  | 59   | 21  | 57   | 18  | 6   | 2  |
| SC | Balneário Camboriú        | 149.227 | 634  | 220 | 609  | 192 | 57  | 21 |
| SC | Balneário Barra do Sul    | 11.271  | 48   | 17  | 46   | 15  | 5   | 2  |
| SC | Balneário Gaivota         | 11.537  | 49   | 17  | 48   | 15  | 5   | 2  |
| SC | Bandeirante               | 2.618   | 12   | 4   | 11   | 4   | 1   | 1  |
| SC | Barra Bonita              | 1.625   | 7    | 3   | 7    | 3   | 1   | 1  |
| SC | Barra Velha               | 30.539  | 130  | 45  | 125  | 40  | 12  | 5  |
| SC | Bela Vista do Toldo       | 6.386   | 28   | 10  | 27   | 9   | 3   | 1  |
| SC | Belmonte                  | 2.712   | 12   | 4   | 12   | 4   | 2   | 1  |
| SC | Benedito Novo             | 11.896  | 51   | 18  | 49   | 16  | 5   | 2  |
| SC | Biguaçu                   | 70.471  | 300  | 104 | 288  | 91  | 27  | 10 |
| SC | Blumenau                  | 366.418 | 1556 | 539 | 1495 | 470 | 139 | 50 |
| SC | Bocaina do Sul            | 3.501   | 15   | 6   | 15   | 5   | 2   | 1  |
| SC | Bombinhas                 | 20.889  | 89   | 31  | 86   | 27  | 8   | 3  |
| SC | Bom Jardim da Serra       | 4.801   | 21   | 8   | 20   | 7   | 2   | 1  |
| SC | Bom Jesus                 | 3.104   | 14   | 5   | 13   | 4   | 2   | 1  |
| SC | Bom Jesus do Oeste        | 2.136   | 10   | 4   | 9    | 3   | 1   | 1  |
| SC | Bom Retiro                | 10.153  | 44   | 15  | 42   | 13  | 4   | 2  |

|    |                        |         |      |     |      |     |     |    |
|----|------------------------|---------|------|-----|------|-----|-----|----|
| SC | Botuverá               | 5.396   | 23   | 8   | 23   | 7   | 3   | 1  |
| SC | Braço do Norte         | 34.294  | 146  | 51  | 140  | 44  | 13  | 5  |
| SC | Braço do Trombudo      | 3.794   | 17   | 6   | 16   | 5   | 2   | 1  |
| SC | Brunópolis             | 2.318   | 10   | 4   | 10   | 3   | 1   | 1  |
| SC | Brusque                | 140.597 | 597  | 207 | 574  | 181 | 54  | 20 |
| SC | Caçador                | 80.017  | 340  | 118 | 327  | 103 | 31  | 11 |
| SC | Caibi                  | 6.112   | 26   | 9   | 25   | 8   | 3   | 1  |
| SC | Calmon                 | 3.325   | 15   | 5   | 14   | 5   | 2   | 1  |
| SC | Camboriú               | 87.179  | 370  | 129 | 356  | 112 | 33  | 12 |
| SC | Capão Alto             | 2.467   | 11   | 4   | 11   | 4   | 1   | 1  |
| SC | Campo Alegre           | 11.985  | 51   | 18  | 49   | 16  | 5   | 2  |
| SC | Campo Belo do Sul      | 6.889   | 30   | 11  | 29   | 9   | 3   | 1  |
| SC | Campo Eré              | 8.312   | 36   | 13  | 34   | 11  | 4   | 2  |
| SC | Campos Novos           | 36.861  | 157  | 55  | 151  | 48  | 14  | 5  |
| SC | Canelinha              | 12.553  | 54   | 19  | 52   | 17  | 5   | 2  |
| SC | Canoinhas              | 54.558  | 232  | 81  | 223  | 70  | 21  | 8  |
| SC | Capinzal               | 23.218  | 99   | 35  | 95   | 30  | 9   | 4  |
| SC | Capivari de Baixo      | 25.477  | 109  | 38  | 104  | 33  | 10  | 4  |
| SC | Catanduvas             | 11.106  | 48   | 17  | 46   | 15  | 5   | 2  |
| SC | Caxambu do Sul         | 3.462   | 15   | 6   | 15   | 5   | 2   | 1  |
| SC | Celso Ramos            | 2.709   | 12   | 4   | 12   | 4   | 2   | 1  |
| SC | Cerro Negro            | 3.013   | 13   | 5   | 13   | 4   | 2   | 1  |
| SC | Chapadão do Lageado    | 3.025   | 13   | 5   | 13   | 4   | 2   | 1  |
| SC | Chapecó                | 227.587 | 966  | 335 | 928  | 292 | 86  | 31 |
| SC | Cocal do Sul           | 16.956  | 72   | 25  | 70   | 22  | 7   | 3  |
| SC | Concórdia              | 75.683  | 322  | 112 | 309  | 97  | 29  | 11 |
| SC | Cordilheira Alta       | 4.585   | 20   | 7   | 19   | 6   | 2   | 1  |
| SC | Coronel Freitas        | 9.900   | 43   | 15  | 41   | 13  | 4   | 2  |
| SC | Coronel Martins        | 2.560   | 11   | 4   | 11   | 4   | 1   | 1  |
| SC | Corupá                 | 16.300  | 70   | 24  | 67   | 21  | 7   | 3  |
| SC | Correia Pinto          | 12.315  | 53   | 19  | 51   | 16  | 5   | 2  |
| SC | Criciúma               | 219.393 | 932  | 323 | 895  | 281 | 83  | 30 |
| SC | Cunha Porã             | 11.150  | 48   | 17  | 46   | 15  | 5   | 2  |
| SC | Cunhataí               | 1.972   | 9    | 3   | 9    | 3   | 1   | 1  |
| SC | Curitibanos            | 40.037  | 170  | 59  | 164  | 52  | 16  | 6  |
| SC | Descanso               | 8.136   | 35   | 12  | 34   | 11  | 4   | 2  |
| SC | Dionísio Cerqueira     | 15.592  | 67   | 23  | 64   | 20  | 6   | 3  |
| SC | Dona Emma              | 4.224   | 18   | 7   | 18   | 6   | 2   | 1  |
| SC | Doutor Pedrinho        | 4.164   | 18   | 7   | 17   | 6   | 2   | 1  |
| SC | Entre Rios             | 3.232   | 14   | 5   | 14   | 5   | 2   | 1  |
| SC | Ermo                   | 2.059   | 9    | 4   | 9    | 3   | 1   | 1  |
| SC | Erval Velho            | 4.423   | 19   | 7   | 19   | 6   | 2   | 1  |
| SC | Faxinal dos Guedes     | 10.630  | 46   | 16  | 44   | 14  | 5   | 2  |
| SC | Flor do Sertão         | 1.575   | 7    | 3   | 7    | 3   | 1   | 1  |
| SC | Florianópolis          | 516.524 | 2193 | 759 | 2107 | 662 | 195 | 70 |
| SC | Formosa do Sul         | 2.481   | 11   | 4   | 11   | 4   | 1   | 1  |
| SC | Forquilha              | 27.621  | 118  | 41  | 113  | 36  | 11  | 4  |
| SC | Fraiburgo              | 36.723  | 156  | 54  | 150  | 48  | 14  | 5  |
| SC | Frei Rogério           | 1.918   | 9    | 3   | 8    | 3   | 1   | 1  |
| SC | Galvão                 | 2.711   | 12   | 4   | 12   | 4   | 2   | 1  |
| SC | Garopaba               | 24.070  | 103  | 36  | 99   | 31  | 10  | 4  |
| SC | Garuva                 | 18.816  | 80   | 28  | 77   | 25  | 8   | 3  |
| SC | Gaspar                 | 71.925  | 306  | 106 | 294  | 93  | 28  | 10 |
| SC | Governador Celso Ramos | 14.739  | 63   | 22  | 61   | 19  | 6   | 2  |
| SC | Grão Pará              | 6.621   | 29   | 10  | 27   | 9   | 3   | 1  |
| SC | Gravatal               | 11.652  | 50   | 18  | 48   | 15  | 5   | 2  |
| SC | Guabiruba              | 24.922  | 106  | 37  | 102  | 32  | 10  | 4  |
| SC | Guaraciaba             | 9.964   | 43   | 15  | 41   | 13  | 4   | 2  |
| SC | Guaramirim             | 46.757  | 199  | 69  | 191  | 60  | 18  | 7  |
| SC | Guarujá do Sul         | 5.196   | 23   | 8   | 22   | 7   | 2   | 1  |
| SC | Guatambú               | 4.692   | 20   | 7   | 20   | 7   | 2   | 1  |
| SC | Herval d'Oeste         | 22.820  | 97   | 34  | 94   | 30  | 9   | 4  |
| SC | Ibiam                  | 1.952   | 9    | 3   | 8    | 3   | 1   | 1  |
| SC | Ibicaré                | 3.154   | 14   | 5   | 13   | 5   | 2   | 1  |
| SC | Ibirama                | 19.238  | 82   | 29  | 79   | 25  | 8   | 3  |
| SC | Içara                  | 58.055  | 247  | 86  | 237  | 75  | 22  | 8  |

|    |                 |         |      |     |      |     |     |    |
|----|-----------------|---------|------|-----|------|-----|-----|----|
| SC | Ilhota          | 14.531  | 62   | 22  | 60   | 19  | 6   | 2  |
| SC | Imaruí          | 9.764   | 42   | 15  | 40   | 13  | 4   | 2  |
| SC | Imbituba        | 45.711  | 194  | 68  | 187  | 59  | 18  | 7  |
| SC | Imbuia          | 6.284   | 27   | 10  | 26   | 9   | 3   | 1  |
| SC | Indaial         | 72.346  | 308  | 107 | 295  | 93  | 28  | 10 |
| SC | Iomerê          | 2.979   | 13   | 5   | 13   | 4   | 2   | 1  |
| SC | Ipira           | 4.367   | 19   | 7   | 18   | 6   | 2   | 1  |
| SC | Iporã do Oeste  | 9.093   | 39   | 14  | 38   | 12  | 4   | 2  |
| SC | Ipuaçú          | 7.643   | 33   | 12  | 32   | 10  | 3   | 2  |
| SC | Ipumirim        | 7.647   | 33   | 12  | 32   | 10  | 3   | 2  |
| SC | Iraceminha      | 3.901   | 17   | 6   | 16   | 5   | 2   | 1  |
| SC | Irani           | 10.575  | 45   | 16  | 44   | 14  | 4   | 2  |
| SC | Irati           | 1.887   | 9    | 3   | 8    | 3   | 1   | 1  |
| SC | Irineópolis     | 11.354  | 49   | 17  | 47   | 15  | 5   | 2  |
| SC | Itá             | 6.091   | 26   | 9   | 25   | 8   | 3   | 1  |
| SC | Itaíópolis      | 21.889  | 93   | 33  | 90   | 29  | 9   | 3  |
| SC | Itajaí          | 226.617 | 962  | 333 | 925  | 291 | 86  | 31 |
| SC | Itapema         | 69.323  | 295  | 102 | 283  | 89  | 27  | 10 |
| SC | Itapiranga      | 17.139  | 73   | 26  | 70   | 22  | 7   | 3  |
| SC | Itapoá          | 21.766  | 93   | 32  | 89   | 28  | 9   | 3  |
| SC | Ituporanga      | 25.619  | 109  | 38  | 105  | 33  | 10  | 4  |
| SC | Jaborá          | 3.899   | 17   | 6   | 16   | 5   | 2   | 1  |
| SC | Jacinto Machado | 10.337  | 44   | 16  | 43   | 14  | 4   | 2  |
| SC | Jaguaruna       | 20.547  | 88   | 31  | 84   | 27  | 8   | 3  |
| SC | Jaraguá do Sul  | 184.579 | 784  | 272 | 753  | 237 | 70  | 25 |
| SC | Jardinópolis    | 1.520   | 7    | 3   | 7    | 2   | 1   | 1  |
| SC | Joaçaba         | 30.684  | 131  | 46  | 126  | 40  | 12  | 5  |
| SC | Joinville       | 604.708 | 2567 | 889 | 2466 | 775 | 229 | 82 |
| SC | José Boiteux    | 5.019   | 22   | 8   | 21   | 7   | 2   | 1  |
| SC | Jupiá           | 2.083   | 9    | 4   | 9    | 3   | 1   | 1  |
| SC | Lacerdópolis    | 2.248   | 10   | 4   | 10   | 3   | 1   | 1  |
| SC | Lages           | 157.158 | 667  | 231 | 641  | 202 | 60  | 22 |
| SC | Laguna          | 46.424  | 198  | 69  | 190  | 60  | 18  | 7  |
| SC | Lajeado Grande  | 1.408   | 6    | 3   | 6    | 2   | 1   | 1  |
| SC | Laurentino      | 7.154   | 31   | 11  | 30   | 10  | 3   | 1  |
| SC | Lauro Müller    | 15.380  | 66   | 23  | 63   | 20  | 6   | 3  |
| SC | Lebon Régis     | 12.122  | 52   | 18  | 50   | 16  | 5   | 2  |
| SC | Leoberto Leal   | 2.960   | 13   | 5   | 13   | 4   | 2   | 1  |
| SC | Lindóia do Sul  | 4.530   | 20   | 7   | 19   | 6   | 2   | 1  |
| SC | Lontras         | 12.497  | 54   | 19  | 51   | 17  | 5   | 2  |
| SC | Luiz Alves      | 13.347  | 57   | 20  | 55   | 18  | 6   | 2  |
| SC | Luzerna         | 5.683   | 25   | 9   | 24   | 8   | 3   | 1  |
| SC | Macieira        | 1.757   | 8    | 3   | 8    | 3   | 1   | 1  |
| SC | Mafra           | 56.825  | 242  | 84  | 232  | 73  | 22  | 8  |
| SC | Major Gercino   | 3.465   | 15   | 6   | 15   | 5   | 2   | 1  |
| SC | Major Vieira    | 8.209   | 35   | 13  | 34   | 11  | 4   | 2  |
| SC | Maracajá        | 7.461   | 32   | 11  | 31   | 10  | 3   | 2  |
| SC | Maravilha       | 26.463  | 113  | 39  | 108  | 34  | 10  | 4  |
| SC | Marema          | 1.703   | 8    | 3   | 7    | 3   | 1   | 1  |
| SC | Massaranduba    | 17.330  | 74   | 26  | 71   | 23  | 7   | 3  |
| SC | Matos Costa     | 2.442   | 11   | 4   | 10   | 4   | 1   | 1  |
| SC | Meleiro         | 6.989   | 30   | 11  | 29   | 9   | 3   | 1  |
| SC | Mirim Doce      | 2.257   | 10   | 4   | 10   | 3   | 1   | 1  |
| SC | Modelo          | 4.227   | 18   | 7   | 18   | 6   | 2   | 1  |
| SC | Mondáí          | 12.034  | 52   | 18  | 50   | 16  | 5   | 2  |
| SC | Monte Carlo     | 9.945   | 43   | 15  | 41   | 13  | 4   | 2  |
| SC | Monte Castelo   | 8.263   | 36   | 13  | 34   | 11  | 4   | 2  |
| SC | Morro da Fumaça | 18.095  | 77   | 27  | 74   | 24  | 7   | 3  |
| SC | Morro Grande    | 2.884   | 13   | 5   | 12   | 4   | 2   | 1  |
| SC | Navegantes      | 85.734  | 364  | 126 | 350  | 110 | 33  | 12 |
| SC | Nova Erechim    | 5.163   | 22   | 8   | 22   | 7   | 2   | 1  |
| SC | Nova Itaberaba  | 4.327   | 19   | 7   | 18   | 6   | 2   | 1  |
| SC | Nova Trento     | 15.010  | 64   | 23  | 62   | 20  | 6   | 3  |
| SC | Nova Veneza     | 15.515  | 66   | 23  | 64   | 20  | 6   | 3  |
| SC | Novo Horizonte  | 2.366   | 11   | 4   | 10   | 4   | 1   | 1  |
| SC | Orleans         | 23.161  | 99   | 35  | 95   | 30  | 9   | 4  |

|    |                              |         |     |     |     |     |    |    |
|----|------------------------------|---------|-----|-----|-----|-----|----|----|
| SC | Otacílio Costa               | 19.201  | 82  | 29  | 79  | 25  | 8  | 3  |
| SC | Ouro                         | 7.251   | 31  | 11  | 30  | 10  | 3  | 1  |
| SC | Ouro Verde                   | 2.197   | 10  | 4   | 9   | 3   | 1  | 1  |
| SC | Paial                        | 1.444   | 7   | 3   | 6   | 2   | 1  | 1  |
| SC | Painel                       | 2.352   | 10  | 4   | 10  | 4   | 1  | 1  |
| SC | Palhoça                      | 178.679 | 759 | 263 | 729 | 229 | 68 | 25 |
| SC | Palma Sola                   | 7.321   | 32  | 11  | 30  | 10  | 3  | 1  |
| SC | Palmeira                     | 2.673   | 12  | 4   | 11  | 4   | 2  | 1  |
| SC | Palmitos                     | 16.144  | 69  | 24  | 66  | 21  | 7  | 3  |
| SC | Papanduva                    | 19.521  | 83  | 29  | 80  | 25  | 8  | 3  |
| SC | Paraíso                      | 3.284   | 14  | 5   | 14  | 5   | 2  | 1  |
| SC | Passo de Torres              | 9.269   | 40  | 14  | 38  | 12  | 4  | 2  |
| SC | Passos Maia                  | 4.072   | 18  | 6   | 17  | 6   | 2  | 1  |
| SC | Paulo Lopes                  | 7.642   | 33  | 12  | 32  | 10  | 3  | 2  |
| SC | Pedras Grandes               | 3.931   | 17  | 6   | 17  | 6   | 2  | 1  |
| SC | Penha                        | 34.022  | 145 | 50  | 139 | 44  | 13 | 5  |
| SC | Peritiba                     | 2.733   | 12  | 5   | 12  | 4   | 2  | 1  |
| SC | Pescaria Brava               | 10.225  | 44  | 16  | 42  | 14  | 4  | 2  |
| SC | Petrolândia                  | 5.873   | 25  | 9   | 24  | 8   | 3  | 1  |
| SC | Balneário Piçarras           | 24.385  | 104 | 36  | 100 | 32  | 10 | 4  |
| SC | Pinhalzinho                  | 21.103  | 90  | 32  | 87  | 28  | 8  | 3  |
| SC | Pinheiro Preto               | 3.635   | 16  | 6   | 15  | 5   | 2  | 1  |
| SC | Piratuba                     | 3.637   | 16  | 6   | 15  | 5   | 2  | 1  |
| SC | Planalto Alegre              | 2.907   | 13  | 5   | 12  | 4   | 2  | 1  |
| SC | Pomerode                     | 34.561  | 147 | 51  | 141 | 45  | 14 | 5  |
| SC | Ponte Alta                   | 4.619   | 20  | 7   | 19  | 6   | 2  | 1  |
| SC | Ponte Alta do Norte          | 3.426   | 15  | 6   | 14  | 5   | 2  | 1  |
| SC | Ponte Serrada                | 11.674  | 50  | 18  | 48  | 15  | 5  | 2  |
| SC | Porto Belo                   | 22.466  | 96  | 34  | 92  | 29  | 9  | 4  |
| SC | Porto União                  | 35.685  | 152 | 53  | 146 | 46  | 14 | 5  |
| SC | Pouso Redondo                | 17.965  | 77  | 27  | 74  | 24  | 7  | 3  |
| SC | Praia Grande                 | 7.305   | 32  | 11  | 30  | 10  | 3  | 1  |
| SC | Presidente Castello Branco   | 1.526   | 7   | 3   | 7   | 2   | 1  | 1  |
| SC | Presidente Getúlio           | 17.973  | 77  | 27  | 74  | 24  | 7  | 3  |
| SC | Presidente Nereu             | 2.279   | 10  | 4   | 10  | 3   | 1  | 1  |
| SC | Princesa                     | 2.950   | 13  | 5   | 13  | 4   | 2  | 1  |
| SC | Quilombo                     | 9.773   | 42  | 15  | 40  | 13  | 4  | 2  |
| SC | Rancho Queimado              | 2.897   | 13  | 5   | 12  | 4   | 2  | 1  |
| SC | Rio das Antas                | 6.199   | 27  | 10  | 26  | 8   | 3  | 1  |
| SC | Rio do Campo                 | 5.864   | 25  | 9   | 24  | 8   | 3  | 1  |
| SC | Rio do Oeste                 | 7.552   | 33  | 12  | 31  | 10  | 3  | 2  |
| SC | Rio dos Cedros               | 11.937  | 51  | 18  | 49  | 16  | 5  | 2  |
| SC | Rio do Sul                   | 72.931  | 310 | 108 | 298 | 94  | 28 | 10 |
| SC | Rio Fortuna                  | 4.630   | 20  | 7   | 19  | 6   | 2  | 1  |
| SC | Rio Negrinho                 | 42.684  | 182 | 63  | 175 | 55  | 17 | 6  |
| SC | Rio Rufino                   | 2.484   | 11  | 4   | 11  | 4   | 1  | 1  |
| SC | Riqueza                      | 4.525   | 20  | 7   | 19  | 6   | 2  | 1  |
| SC | Rodeio                       | 11.647  | 50  | 18  | 48  | 15  | 5  | 2  |
| SC | Romelândia                   | 4.584   | 20  | 7   | 19  | 6   | 2  | 1  |
| SC | Salete                       | 7.674   | 33  | 12  | 32  | 10  | 3  | 2  |
| SC | Saltinho                     | 3.727   | 16  | 6   | 16  | 5   | 2  | 1  |
| SC | Salto Veloso                 | 4.792   | 21  | 8   | 20  | 7   | 2  | 1  |
| SC | Sangão                       | 13.128  | 56  | 20  | 54  | 17  | 5  | 2  |
| SC | Santa Cecília                | 17.004  | 73  | 25  | 70  | 22  | 7  | 3  |
| SC | Santa Helena                 | 2.178   | 10  | 4   | 9   | 3   | 1  | 1  |
| SC | Santa Rosa de Lima           | 2.151   | 10  | 4   | 9   | 3   | 1  | 1  |
| SC | Santa Rosa do Sul            | 8.397   | 36  | 13  | 35  | 11  | 4  | 2  |
| SC | Santa Terezinha              | 8.760   | 38  | 13  | 36  | 12  | 4  | 2  |
| SC | Santa Terezinha do Progresso | 2.317   | 10  | 4   | 10  | 3   | 1  | 1  |
| SC | Santiago do Sul              | 1.211   | 6   | 2   | 5   | 2   | 1  | 1  |
| SC | Santo Amaro da Imperatriz    | 23.907  | 102 | 36  | 98  | 31  | 10 | 4  |
| SC | São Bernardino               | 2.239   | 10  | 4   | 10  | 3   | 1  | 1  |
| SC | São Bento do Sul             | 86.317  | 367 | 127 | 352 | 111 | 33 | 12 |
| SC | São Bonifácio                | 2.791   | 12  | 5   | 12  | 4   | 2  | 1  |
| SC | São Carlos                   | 11.456  | 49  | 17  | 47  | 15  | 5  | 2  |
| SC | São Cristóvão do Sul         | 5.646   | 24  | 9   | 24  | 8   | 3  | 1  |

|    |                            |         |      |     |      |     |    |    |
|----|----------------------------|---------|------|-----|------|-----|----|----|
| SC | São Domingos               | 9.422   | 40   | 14  | 39   | 13  | 4  | 2  |
| SC | São Francisco do Sul       | 54.751  | 233  | 81  | 224  | 71  | 21 | 8  |
| SC | São João do Oeste          | 6.423   | 28   | 10  | 27   | 9   | 3  | 1  |
| SC | São João Batista           | 39.719  | 169  | 59  | 162  | 51  | 15 | 6  |
| SC | São João do Itaperiú       | 3.784   | 17   | 6   | 16   | 5   | 2  | 1  |
| SC | São João do Sul            | 7.332   | 32   | 11  | 30   | 10  | 3  | 1  |
| SC | São Joaquim                | 27.322  | 116  | 41  | 112  | 35  | 11 | 4  |
| SC | São José                   | 253.705 | 1077 | 373 | 1035 | 325 | 96 | 35 |
| SC | São José do Cedro          | 13.811  | 59   | 21  | 57   | 18  | 6  | 2  |
| SC | São José do Cerrito        | 8.054   | 35   | 12  | 33   | 11  | 4  | 2  |
| SC | São Lourenço do Oeste      | 24.501  | 104  | 37  | 100  | 32  | 10 | 4  |
| SC | São Ludgero                | 13.886  | 59   | 21  | 57   | 18  | 6  | 2  |
| SC | São Martinho               | 3.162   | 14   | 5   | 13   | 5   | 2  | 1  |
| SC | São Miguel da Boa Vista    | 1.794   | 8    | 3   | 8    | 3   | 1  | 1  |
| SC | São Miguel do Oeste        | 41.246  | 176  | 61  | 169  | 53  | 16 | 6  |
| SC | São Pedro de Alcântara     | 6.046   | 26   | 9   | 25   | 8   | 3  | 1  |
| SC | Saudades                   | 9.874   | 42   | 15  | 41   | 13  | 4  | 2  |
| SC | Schroeder                  | 22.605  | 96   | 34  | 93   | 29  | 9  | 4  |
| SC | Seara                      | 17.610  | 75   | 26  | 72   | 23  | 7  | 3  |
| SC | Serra Alta                 | 3.249   | 14   | 5   | 14   | 5   | 2  | 1  |
| SC | Siderópolis                | 14.176  | 61   | 21  | 58   | 19  | 6  | 2  |
| SC | Sombrio                    | 31.084  | 132  | 46  | 127  | 40  | 12 | 5  |
| SC | Sul Brasil                 | 2.386   | 11   | 4   | 10   | 4   | 1  | 1  |
| SC | Taió                       | 18.576  | 79   | 28  | 76   | 24  | 8  | 3  |
| SC | Tangará                    | 8.648   | 37   | 13  | 36   | 12  | 4  | 2  |
| SC | Tigrinhos                  | 1.606   | 7    | 3   | 7    | 3   | 1  | 1  |
| SC | Tijucas                    | 39.889  | 170  | 59  | 163  | 52  | 16 | 6  |
| SC | Timbé do Sul               | 5.338   | 23   | 8   | 22   | 7   | 3  | 1  |
| SC | Timbó                      | 45.703  | 194  | 68  | 187  | 59  | 18 | 7  |
| SC | Timbó Grande               | 8.003   | 34   | 12  | 33   | 11  | 4  | 2  |
| SC | Três Barras                | 19.455  | 83   | 29  | 80   | 25  | 8  | 3  |
| SC | Treviso                    | 4.002   | 17   | 6   | 17   | 6   | 2  | 1  |
| SC | Treze de Maio              | 7.104   | 31   | 11  | 29   | 10  | 3  | 1  |
| SC | Treze Tilias               | 8.138   | 35   | 12  | 34   | 11  | 4  | 2  |
| SC | Trombudo Central           | 7.506   | 32   | 12  | 31   | 10  | 3  | 2  |
| SC | Tubarão                    | 107.143 | 455  | 158 | 437  | 138 | 41 | 15 |
| SC | Tunápolis                  | 4.507   | 20   | 7   | 19   | 6   | 2  | 1  |
| SC | Turvo                      | 13.080  | 56   | 20  | 54   | 17  | 5  | 2  |
| SC | União do Oeste             | 2.364   | 11   | 4   | 10   | 4   | 1  | 1  |
| SC | Urubici                    | 11.311  | 49   | 17  | 47   | 15  | 5  | 2  |
| SC | Urupema                    | 2.453   | 11   | 4   | 11   | 4   | 1  | 1  |
| SC | Urussanga                  | 21.419  | 91   | 32  | 88   | 28  | 9  | 3  |
| SC | Vargeão                    | 3.569   | 16   | 6   | 15   | 5   | 2  | 1  |
| SC | Vargem                     | 2.387   | 11   | 4   | 10   | 4   | 1  | 1  |
| SC | Vargem Bonita              | 4.411   | 19   | 7   | 18   | 6   | 2  | 1  |
| SC | Vidal Ramos                | 6.321   | 27   | 10  | 26   | 9   | 3  | 1  |
| SC | Videira                    | 54.145  | 230  | 80  | 221  | 70  | 21 | 8  |
| SC | Vitor Meireles             | 4.907   | 21   | 8   | 21   | 7   | 2  | 1  |
| SC | Witmarsum                  | 4.032   | 18   | 6   | 17   | 6   | 2  | 1  |
| SC | Xanxerê                    | 52.290  | 222  | 77  | 214  | 67  | 20 | 8  |
| SC | Xavantina                  | 3.873   | 17   | 6   | 16   | 5   | 2  | 1  |
| SC | Xaxim                      | 29.254  | 125  | 43  | 120  | 38  | 12 | 4  |
| SC | Zortéa                     | 3.432   | 15   | 6   | 14   | 5   | 2  | 1  |
| SC | Balneário Rincão           | 13.129  | 56   | 20  | 54   | 17  | 5  | 2  |
| RS | Aceguá                     | 4.981   | 22   | 8   | 21   | 7   | 2  | 1  |
| RS | Água Santa                 | 3.738   | 17   | 6   | 16   | 5   | 2  | 1  |
| RS | Agudo                      | 16.344  | 71   | 25  | 68   | 22  | 7  | 3  |
| RS | Ajuricaba                  | 6.951   | 30   | 11  | 29   | 10  | 3  | 1  |
| RS | Alecrim                    | 5.710   | 25   | 9   | 24   | 8   | 3  | 1  |
| RS | Alegrete                   | 72.493  | 312  | 108 | 300  | 95  | 28 | 10 |
| RS | Alegria                    | 3.287   | 15   | 5   | 14   | 5   | 2  | 1  |
| RS | Almirante Tamandaré do Sul | 1.935   | 9    | 3   | 8    | 3   | 1  | 1  |
| RS | Alpestre                   | 5.885   | 26   | 9   | 25   | 8   | 3  | 1  |
| RS | Alto Alegre                | 1.590   | 7    | 3   | 7    | 3   | 1  | 1  |
| RS | Alto Feliz                 | 3.043   | 14   | 5   | 13   | 4   | 2  | 1  |
| RS | Alvorada                   | 212.352 | 914  | 317 | 878  | 276 | 82 | 30 |

|    |                          |         |     |     |     |     |    |    |
|----|--------------------------|---------|-----|-----|-----|-----|----|----|
| RS | Amaral Ferrador          | 7.136   | 31  | 11  | 30  | 10  | 3  | 1  |
| RS | Ametista do Sul          | 7.396   | 32  | 12  | 31  | 10  | 3  | 2  |
| RS | André da Rocha           | 1.351   | 6   | 3   | 6   | 2   | 1  | 1  |
| RS | Anta Gorda               | 5.941   | 26  | 9   | 25  | 8   | 3  | 1  |
| RS | Antônio Prado            | 13.041  | 57  | 20  | 54  | 17  | 5  | 2  |
| RS | Arambaré                 | 3.544   | 16  | 6   | 15  | 5   | 2  | 1  |
| RS | Araricá                  | 5.840   | 26  | 9   | 25  | 8   | 3  | 1  |
| RS | Aratiba                  | 6.145   | 27  | 10  | 26  | 8   | 3  | 1  |
| RS | Arroio do Meio           | 21.121  | 91  | 32  | 88  | 28  | 9  | 3  |
| RS | Arroio do Sal            | 10.483  | 46  | 16  | 44  | 14  | 5  | 2  |
| RS | Arroio do Padre          | 2.966   | 13  | 5   | 13  | 4   | 2  | 1  |
| RS | Arroio dos Ratos         | 14.201  | 62  | 22  | 59  | 19  | 6  | 2  |
| RS | Arroio do Tigre          | 13.452  | 58  | 21  | 56  | 18  | 6  | 2  |
| RS | Arroio Grande            | 18.185  | 79  | 28  | 76  | 24  | 7  | 3  |
| RS | Arvorezinha              | 10.422  | 45  | 16  | 44  | 14  | 4  | 2  |
| RS | Augusto Pestana          | 6.545   | 29  | 10  | 28  | 9   | 3  | 1  |
| RS | Áurea                    | 3.517   | 16  | 6   | 15  | 5   | 2  | 1  |
| RS | Bagé                     | 121.518 | 523 | 181 | 503 | 158 | 47 | 17 |
| RS | Balneário Pinhal         | 14.645  | 63  | 22  | 61  | 20  | 6  | 3  |
| RS | Barão                    | 6.232   | 27  | 10  | 26  | 9   | 3  | 1  |
| RS | Barão de Cotegipe        | 6.616   | 29  | 10  | 28  | 9   | 3  | 1  |
| RS | Barão do Triunfo         | 7.550   | 33  | 12  | 32  | 10  | 3  | 2  |
| RS | Barracão                 | 5.237   | 23  | 8   | 22  | 7   | 3  | 1  |
| RS | Barra do Guarita         | 3.266   | 15  | 5   | 14  | 5   | 2  | 1  |
| RS | Barra do Quaraí          | 4.238   | 19  | 7   | 18  | 6   | 2  | 1  |
| RS | Barra do Ribeiro         | 13.618  | 59  | 21  | 57  | 18  | 6  | 2  |
| RS | Barra do Rio Azul        | 1.621   | 7   | 3   | 7   | 3   | 1  | 1  |
| RS | Barra Funda              | 2.563   | 12  | 4   | 11  | 4   | 1  | 1  |
| RS | Barros Cassal            | 11.167  | 49  | 17  | 47  | 15  | 5  | 2  |
| RS | Benjamin Constant do Sul | 1.924   | 9   | 3   | 8   | 3   | 1  | 1  |
| RS | Bento Gonçalves          | 123.090 | 530 | 184 | 509 | 160 | 48 | 17 |
| RS | Boa Vista das Missões    | 2.087   | 9   | 4   | 9   | 3   | 1  | 1  |
| RS | Boa Vista do Buricá      | 6.712   | 29  | 10  | 28  | 9   | 3  | 1  |
| RS | Boa Vista do Cadeado     | 2.466   | 11  | 4   | 11  | 4   | 1  | 1  |
| RS | Boa Vista do Incra       | 2.628   | 12  | 4   | 11  | 4   | 2  | 1  |
| RS | Boa Vista do Sul         | 2.773   | 12  | 5   | 12  | 4   | 2  | 1  |
| RS | Bom Jesus                | 11.270  | 49  | 17  | 47  | 15  | 5  | 2  |
| RS | Bom Princípio            | 14.446  | 63  | 22  | 60  | 19  | 6  | 2  |
| RS | Bom Progresso            | 1.858   | 8   | 3   | 8   | 3   | 1  | 1  |
| RS | Bom Retiro do Sul        | 12.448  | 54  | 19  | 52  | 17  | 5  | 2  |
| RS | Boqueirão do Leão        | 7.691   | 34  | 12  | 32  | 10  | 3  | 2  |
| RS | Bossoroca                | 6.135   | 27  | 10  | 26  | 8   | 3  | 1  |
| RS | Bozano                   | 2.099   | 10  | 4   | 9   | 3   | 1  | 1  |
| RS | Braga                    | 3.271   | 15  | 5   | 14  | 5   | 2  | 1  |
| RS | Brochier                 | 5.132   | 23  | 8   | 22  | 7   | 2  | 1  |
| RS | Butiá                    | 20.963  | 91  | 32  | 87  | 28  | 9  | 3  |
| RS | Caçapava do Sul          | 33.476  | 144 | 50  | 139 | 44  | 13 | 5  |
| RS | Cacequi                  | 12.291  | 53  | 19  | 51  | 16  | 5  | 2  |
| RS | Cachoeira do Sul         | 81.552  | 351 | 122 | 337 | 106 | 32 | 12 |
| RS | Cachoeirinha             | 132.144 | 569 | 197 | 546 | 172 | 51 | 19 |
| RS | Cacique Doble            | 5.083   | 22  | 8   | 22  | 7   | 2  | 1  |
| RS | Caibaté                  | 4.802   | 21  | 8   | 20  | 7   | 2  | 1  |
| RS | Caiçara                  | 4.659   | 21  | 7   | 20  | 7   | 2  | 1  |
| RS | Camaquã                  | 66.686  | 287 | 100 | 276 | 87  | 26 | 10 |
| RS | Camargo                  | 2.750   | 12  | 5   | 12  | 4   | 2  | 1  |
| RS | Cambará do Sul           | 6.383   | 28  | 10  | 27  | 9   | 3  | 1  |
| RS | Campestre da Serra       | 3.402   | 15  | 6   | 15  | 5   | 2  | 1  |
| RS | Campina das Missões      | 5.325   | 23  | 8   | 23  | 7   | 3  | 1  |
| RS | Campinas do Sul          | 5.422   | 24  | 9   | 23  | 8   | 3  | 1  |
| RS | Campo Bom                | 69.981  | 301 | 105 | 290 | 91  | 27 | 10 |
| RS | Campo Novo               | 4.273   | 19  | 7   | 18  | 6   | 2  | 1  |
| RS | Campos Borges            | 3.272   | 15  | 5   | 14  | 5   | 2  | 1  |
| RS | Candelária               | 31.475  | 136 | 47  | 131 | 41  | 13 | 5  |
| RS | Cândido Godói            | 6.106   | 27  | 10  | 26  | 8   | 3  | 1  |
| RS | Candiota                 | 9.707   | 42  | 15  | 41  | 13  | 4  | 2  |
| RS | Canela                   | 45.957  | 198 | 69  | 190 | 60  | 18 | 7  |

|    |                         |         |      |     |      |     |     |    |
|----|-------------------------|---------|------|-----|------|-----|-----|----|
| RS | Canguçu                 | 56.370  | 243  | 84  | 233  | 74  | 22  | 8  |
| RS | Canoas                  | 349.728 | 1504 | 521 | 1445 | 454 | 134 | 48 |
| RS | Canudos do Vale         | 1.693   | 8    | 3   | 7    | 3   | 1   | 1  |
| RS | Capão Bonito do Sul     | 1.628   | 8    | 3   | 7    | 3   | 1   | 1  |
| RS | Capão da Canoa          | 55.009  | 237  | 82  | 228  | 72  | 22  | 8  |
| RS | Capão do Cipó           | 3.745   | 17   | 6   | 16   | 5   | 2   | 1  |
| RS | Capão do Leão           | 25.462  | 110  | 38  | 106  | 34  | 10  | 4  |
| RS | Capivari do Sul         | 4.793   | 21   | 8   | 20   | 7   | 2   | 1  |
| RS | Capela de Santana       | 12.183  | 53   | 19  | 51   | 16  | 5   | 2  |
| RS | Capitão                 | 2.770   | 12   | 5   | 12   | 4   | 2   | 1  |
| RS | Carazinho               | 62.413  | 269  | 93  | 258  | 81  | 24  | 9  |
| RS | Caraá                   | 8.426   | 37   | 13  | 35   | 11  | 4   | 2  |
| RS | Carlos Barbosa          | 30.630  | 132  | 46  | 127  | 40  | 12  | 5  |
| RS | Carlos Gomes            | 1.327   | 6    | 2   | 6    | 2   | 1   | 1  |
| RS | Casca                   | 9.070   | 40   | 14  | 38   | 12  | 4   | 2  |
| RS | Caseiros                | 3.228   | 14   | 5   | 14   | 5   | 2   | 1  |
| RS | Catuípe                 | 8.631   | 38   | 13  | 36   | 12  | 4   | 2  |
| RS | Caxias do Sul           | 523.716 | 2253 | 780 | 2164 | 680 | 201 | 72 |
| RS | Centenário              | 2.865   | 13   | 5   | 12   | 4   | 2   | 1  |
| RS | Cerrito                 | 6.005   | 26   | 9   | 25   | 8   | 3   | 1  |
| RS | Cerro Branco            | 4.720   | 21   | 8   | 20   | 7   | 2   | 1  |
| RS | Cerro Grande            | 2.281   | 10   | 4   | 10   | 3   | 1   | 1  |
| RS | Cerro Grande do Sul     | 12.579  | 55   | 19  | 52   | 17  | 5   | 2  |
| RS | Cerro Largo             | 14.243  | 62   | 22  | 59   | 19  | 6   | 2  |
| RS | Chapada                 | 9.211   | 40   | 14  | 39   | 12  | 4   | 2  |
| RS | Charqueadas             | 41.705  | 180  | 63  | 173  | 55  | 16  | 6  |
| RS | Charrua                 | 3.228   | 14   | 5   | 14   | 5   | 2   | 1  |
| RS | Chiapetta               | 3.684   | 16   | 6   | 16   | 5   | 2   | 1  |
| RS | Chuí                    | 6.832   | 30   | 11  | 29   | 9   | 3   | 1  |
| RS | Chувисca                | 5.518   | 24   | 9   | 23   | 8   | 3   | 1  |
| RS | Cidreira                | 16.897  | 73   | 26  | 70   | 22  | 7   | 3  |
| RS | Ciríaco                 | 4.693   | 21   | 7   | 20   | 7   | 2   | 1  |
| RS | Colinas                 | 2.466   | 11   | 4   | 11   | 4   | 1   | 1  |
| RS | Colorado                | 3.088   | 14   | 5   | 13   | 5   | 2   | 1  |
| RS | Condor                  | 6.766   | 30   | 11  | 28   | 9   | 3   | 1  |
| RS | Constantina             | 9.903   | 43   | 15  | 41   | 13  | 4   | 2  |
| RS | Coqueiro Baixo          | 1.490   | 7    | 3   | 7    | 2   | 1   | 1  |
| RS | Coqueiros do Sul        | 2.267   | 10   | 4   | 10   | 3   | 1   | 1  |
| RS | Coronel Barros          | 2.521   | 11   | 4   | 11   | 4   | 1   | 1  |
| RS | Coronel Bicaco          | 7.213   | 32   | 11  | 30   | 10  | 3   | 1  |
| RS | Coronel Pilar           | 1.602   | 7    | 3   | 7    | 3   | 1   | 1  |
| RS | Cotiporã                | 3.824   | 17   | 6   | 16   | 5   | 2   | 1  |
| RS | Coxilha                 | 2.731   | 12   | 5   | 12   | 4   | 2   | 1  |
| RS | Crissiumal              | 13.269  | 58   | 20  | 55   | 18  | 6   | 2  |
| RS | Cristal                 | 8.121   | 35   | 13  | 34   | 11  | 4   | 2  |
| RS | Cristal do Sul          | 2.840   | 13   | 5   | 12   | 4   | 2   | 1  |
| RS | Cruz Alta               | 59.561  | 257  | 89  | 247  | 78  | 23  | 9  |
| RS | Cruzaltense             | 1.765   | 8    | 3   | 8    | 3   | 1   | 1  |
| RS | Cruzeiro do Sul         | 12.457  | 54   | 19  | 52   | 17  | 5   | 2  |
| RS | David Canabarro         | 4.732   | 21   | 8   | 20   | 7   | 2   | 1  |
| RS | Derrubadas              | 2.718   | 12   | 5   | 12   | 4   | 2   | 1  |
| RS | Dezesseis de Novembro   | 2.331   | 11   | 4   | 10   | 4   | 1   | 1  |
| RS | Dilermando de Aguiar    | 2.991   | 13   | 5   | 13   | 4   | 2   | 1  |
| RS | Dois Irmãos             | 33.547  | 145  | 50  | 139  | 44  | 13  | 5  |
| RS | Dois Irmãos das Missões | 1.992   | 9    | 3   | 9    | 3   | 1   | 1  |
| RS | Dois Lajeados           | 3.410   | 15   | 6   | 15   | 5   | 2   | 1  |
| RS | Dom Feliciano           | 15.556  | 67   | 24  | 65   | 21  | 6   | 3  |
| RS | Dom Pedro de Alcântara  | 2.520   | 11   | 4   | 11   | 4   | 1   | 1  |
| RS | Dom Pedrito             | 38.222  | 165  | 57  | 158  | 50  | 15  | 6  |
| RS | Dona Francisca          | 2.958   | 13   | 5   | 13   | 4   | 2   | 1  |
| RS | Doutor Maurício Cardoso | 4.380   | 19   | 7   | 19   | 6   | 2   | 1  |
| RS | Doutor Ricardo          | 1.967   | 9    | 3   | 9    | 3   | 1   | 1  |
| RS | Eldorado do Sul         | 42.490  | 183  | 64  | 176  | 56  | 17  | 6  |
| RS | Encantado               | 23.047  | 100  | 35  | 96   | 30  | 9   | 4  |
| RS | Encruzilhada do Sul     | 26.039  | 112  | 39  | 108  | 34  | 10  | 4  |
| RS | Engenho Velho           | 932     | 5    | 2   | 4    | 2   | 1   | 1  |



|    |                       |         |      |     |      |     |     |    |
|----|-----------------------|---------|------|-----|------|-----|-----|----|
| RS | Entre-Ijuís           | 8.350   | 36   | 13  | 35   | 11  | 4   | 2  |
| RS | Entre Rios do Sul     | 2.724   | 12   | 5   | 12   | 4   | 2   | 1  |
| RS | Erebango              | 2.978   | 13   | 5   | 13   | 4   | 2   | 1  |
| RS | Erechim               | 107.368 | 462  | 160 | 444  | 140 | 42  | 15 |
| RS | Ernestina             | 3.171   | 14   | 5   | 14   | 5   | 2   | 1  |
| RS | Herval                | 6.807   | 30   | 11  | 29   | 9   | 3   | 1  |
| RS | Erval Grande          | 4.780   | 21   | 8   | 20   | 7   | 2   | 1  |
| RS | Erval Seco            | 6.697   | 29   | 10  | 28   | 9   | 3   | 1  |
| RS | Esmeralda             | 3.291   | 15   | 5   | 14   | 5   | 2   | 1  |
| RS | Esperança do Sul      | 2.846   | 13   | 5   | 12   | 4   | 2   | 1  |
| RS | Espumoso              | 15.594  | 68   | 24  | 65   | 21  | 6   | 3  |
| RS | Estação               | 5.924   | 26   | 9   | 25   | 8   | 3   | 1  |
| RS | Estância Velha        | 51.292  | 221  | 77  | 212  | 67  | 20  | 8  |
| RS | Esteio                | 83.352  | 359  | 125 | 345  | 109 | 32  | 12 |
| RS | Estrela               | 34.669  | 150  | 52  | 144  | 45  | 14  | 5  |
| RS | Estrela Velha         | 3.646   | 16   | 6   | 16   | 5   | 2   | 1  |
| RS | Eugênio de Castro     | 2.310   | 10   | 4   | 10   | 3   | 1   | 1  |
| RS | Fagundes Varela       | 2.750   | 12   | 5   | 12   | 4   | 2   | 1  |
| RS | Farroupilha           | 73.758  | 318  | 110 | 305  | 96  | 29  | 11 |
| RS | Faxinal do Soturno    | 6.651   | 29   | 10  | 28   | 9   | 3   | 1  |
| RS | Faxinalzinho          | 2.256   | 10   | 4   | 10   | 3   | 1   | 1  |
| RS | Fazenda Vilanova      | 4.680   | 21   | 7   | 20   | 7   | 2   | 1  |
| RS | Feliz                 | 13.728  | 60   | 21  | 57   | 18  | 6   | 2  |
| RS | Flores da Cunha       | 31.352  | 135  | 47  | 130  | 41  | 12  | 5  |
| RS | Floriano Peixoto      | 1.709   | 8    | 3   | 8    | 3   | 1   | 1  |
| RS | Fontoura Xavier       | 10.181  | 44   | 16  | 43   | 14  | 4   | 2  |
| RS | Formigueiro           | 6.569   | 29   | 10  | 28   | 9   | 3   | 1  |
| RS | Forquetinha           | 2.389   | 11   | 4   | 10   | 4   | 1   | 1  |
| RS | Fortaleza dos Valos   | 4.252   | 19   | 7   | 18   | 6   | 2   | 1  |
| RS | Frederico Westphalen  | 31.675  | 137  | 48  | 131  | 42  | 13  | 5  |
| RS | Garibaldi             | 35.794  | 154  | 54  | 148  | 47  | 14  | 5  |
| RS | Garruchos             | 2.851   | 13   | 5   | 12   | 4   | 2   | 1  |
| RS | Gaurama               | 5.447   | 24   | 9   | 23   | 8   | 3   | 1  |
| RS | General Câmara        | 8.339   | 36   | 13  | 35   | 11  | 4   | 2  |
| RS | Gentil                | 1.619   | 7    | 3   | 7    | 3   | 1   | 1  |
| RS | Getúlio Vargas        | 16.158  | 70   | 25  | 67   | 21  | 7   | 3  |
| RS | Girúá                 | 15.729  | 68   | 24  | 65   | 21  | 7   | 3  |
| RS | Glorinha              | 8.304   | 36   | 13  | 35   | 11  | 4   | 2  |
| RS | Gramado               | 36.864  | 159  | 55  | 153  | 48  | 15  | 6  |
| RS | Gramado dos Loureiros | 2.036   | 9    | 4   | 9    | 3   | 1   | 1  |
| RS | Gramado Xavier        | 4.378   | 19   | 7   | 19   | 6   | 2   | 1  |
| RS | Gravataí              | 285.564 | 1229 | 426 | 1180 | 371 | 110 | 40 |
| RS | Guabiju               | 1.478   | 7    | 3   | 7    | 2   | 1   | 1  |
| RS | Guaíba                | 98.331  | 423  | 147 | 407  | 128 | 38  | 14 |
| RS | Guaporé               | 26.199  | 113  | 40  | 109  | 34  | 11  | 4  |
| RS | Guarani das Missões   | 7.393   | 32   | 12  | 31   | 10  | 3   | 2  |
| RS | Harmonia              | 4.967   | 22   | 8   | 21   | 7   | 2   | 1  |
| RS | Herveiras             | 3.019   | 13   | 5   | 13   | 4   | 2   | 1  |
| RS | Horizontina           | 19.446  | 84   | 29  | 81   | 26  | 8   | 3  |
| RS | Hulha Negra           | 6.894   | 30   | 11  | 29   | 9   | 3   | 1  |
| RS | Humaitá               | 4.712   | 21   | 8   | 20   | 7   | 2   | 1  |
| RS | Ibarama               | 4.393   | 19   | 7   | 19   | 6   | 2   | 1  |
| RS | Ibiaçá                | 4.690   | 21   | 7   | 20   | 7   | 2   | 1  |
| RS | Ibiraiaras            | 7.267   | 32   | 11  | 31   | 10  | 3   | 1  |
| RS | Ibirapuitã            | 3.988   | 18   | 6   | 17   | 6   | 2   | 1  |
| RS | Ibirubá               | 20.474  | 89   | 31  | 85   | 27  | 8   | 3  |
| RS | Igrejinha             | 37.754  | 163  | 57  | 156  | 49  | 15  | 6  |
| RS | Ijuí                  | 84.041  | 362  | 126 | 348  | 110 | 33  | 12 |
| RS | Ilópolis              | 4.054   | 18   | 7   | 17   | 6   | 2   | 1  |
| RS | Imbé                  | 23.721  | 103  | 36  | 99   | 31  | 10  | 4  |
| RS | Imigrante             | 3.103   | 14   | 5   | 13   | 5   | 2   | 1  |
| RS | Independência         | 6.054   | 27   | 10  | 26   | 8   | 3   | 1  |
| RS | Inhacorá              | 2.207   | 10   | 4   | 10   | 3   | 1   | 1  |
| RS | Ipê                   | 6.736   | 29   | 11  | 28   | 9   | 3   | 1  |
| RS | Ipiranga do Sul       | 1.871   | 9    | 3   | 8    | 3   | 1   | 1  |
| RS | Iraí                  | 7.046   | 31   | 11  | 30   | 10  | 3   | 1  |

|    |                         |        |     |     |     |     |    |    |
|----|-------------------------|--------|-----|-----|-----|-----|----|----|
| RS | Itaara                  | 5.573  | 24  | 9   | 24  | 8   | 3  | 1  |
| RS | Itacurubi               | 3.456  | 15  | 6   | 15  | 5   | 2  | 1  |
| RS | Itapuca                 | 2.037  | 9   | 4   | 9   | 3   | 1  | 1  |
| RS | Itaqui                  | 37.363 | 161 | 56  | 155 | 49  | 15 | 6  |
| RS | Itati                   | 2.377  | 11  | 4   | 10  | 4   | 1  | 1  |
| RS | Itatiba do Sul          | 3.143  | 14  | 5   | 13  | 5   | 2  | 1  |
| RS | Ivorá                   | 1.854  | 8   | 3   | 8   | 3   | 1  | 1  |
| RS | Ivoti                   | 25.068 | 108 | 38  | 104 | 33  | 10 | 4  |
| RS | Jaboticaba              | 3.738  | 17  | 6   | 16  | 5   | 2  | 1  |
| RS | Jacuizinho              | 2.718  | 12  | 5   | 12  | 4   | 2  | 1  |
| RS | Jacutinga               | 3.532  | 16  | 6   | 15  | 5   | 2  | 1  |
| RS | Jaguarão                | 26.327 | 114 | 40  | 109 | 35  | 11 | 4  |
| RS | Jaguari                 | 10.684 | 46  | 16  | 45  | 14  | 5  | 2  |
| RS | Jaquirana               | 3.611  | 16  | 6   | 15  | 5   | 2  | 1  |
| RS | Jari                    | 3.472  | 15  | 6   | 15  | 5   | 2  | 1  |
| RS | Jóia                    | 8.571  | 37  | 13  | 36  | 12  | 4  | 2  |
| RS | Júlio de Castilhos      | 19.159 | 83  | 29  | 80  | 25  | 8  | 3  |
| RS | Lagoa Bonita do Sul     | 2.939  | 13  | 5   | 13  | 4   | 2  | 1  |
| RS | Lagoão                  | 6.469  | 28  | 10  | 27  | 9   | 3  | 1  |
| RS | Lagoa dos Três Cantos   | 1.604  | 7   | 3   | 7   | 3   | 1  | 1  |
| RS | Lagoa Vermelha          | 27.751 | 120 | 42  | 115 | 37  | 11 | 4  |
| RS | Lajeado                 | 86.005 | 370 | 129 | 356 | 112 | 33 | 12 |
| RS | Lajeado do Bugre        | 2.569  | 12  | 4   | 11  | 4   | 1  | 1  |
| RS | Lavras do Sul           | 7.410  | 32  | 12  | 31  | 10  | 3  | 2  |
| RS | Liberato Salzano        | 5.087  | 22  | 8   | 22  | 7   | 2  | 1  |
| RS | Lindolfo Collor         | 6.193  | 27  | 10  | 26  | 9   | 3  | 1  |
| RS | Linha Nova              | 1.724  | 8   | 3   | 8   | 3   | 1  | 1  |
| RS | Machadinho              | 5.411  | 24  | 9   | 23  | 8   | 3  | 1  |
| RS | Maçambará               | 4.539  | 20  | 7   | 19  | 6   | 2  | 1  |
| RS | Mampituba               | 2.965  | 13  | 5   | 13  | 4   | 2  | 1  |
| RS | Manoel Viana            | 7.315  | 32  | 11  | 31  | 10  | 3  | 2  |
| RS | Maquiné                 | 6.747  | 30  | 11  | 28  | 9   | 3  | 1  |
| RS | Maratá                  | 2.713  | 12  | 5   | 12  | 4   | 2  | 1  |
| RS | Marau                   | 45.523 | 196 | 68  | 189 | 60  | 18 | 7  |
| RS | Marcelino Ramos         | 4.239  | 19  | 7   | 18  | 6   | 2  | 1  |
| RS | Mariana Pimentel        | 3.892  | 17  | 6   | 17  | 6   | 2  | 1  |
| RS | Mariano Moro            | 1.987  | 9   | 3   | 9   | 3   | 1  | 1  |
| RS | Marques de Souza        | 3.981  | 18  | 6   | 17  | 6   | 2  | 1  |
| RS | Mata                    | 4.760  | 21  | 8   | 20  | 7   | 2  | 1  |
| RS | Mato Castelhano         | 2.543  | 11  | 4   | 11  | 4   | 1  | 1  |
| RS | Mato Leitão             | 4.627  | 20  | 7   | 20  | 7   | 2  | 1  |
| RS | Mato Queimado           | 1.611  | 7   | 3   | 7   | 3   | 1  | 1  |
| RS | Maximiliano de Almeida  | 4.254  | 19  | 7   | 18  | 6   | 2  | 1  |
| RS | Minas do Leão           | 8.130  | 35  | 13  | 34  | 11  | 4  | 2  |
| RS | Miraguaí                | 4.899  | 22  | 8   | 21  | 7   | 2  | 1  |
| RS | Montauri                | 1.430  | 7   | 3   | 6   | 2   | 1  | 1  |
| RS | Monte Alegre dos Campos | 3.237  | 14  | 5   | 14  | 5   | 2  | 1  |
| RS | Monte Belo do Sul       | 2.514  | 11  | 4   | 11  | 4   | 1  | 1  |
| RS | Montenegro              | 66.157 | 285 | 99  | 274 | 86  | 26 | 10 |
| RS | Mormaço                 | 3.139  | 14  | 5   | 13  | 5   | 2  | 1  |
| RS | Morrinhos do Sul        | 2.891  | 13  | 5   | 12  | 4   | 2  | 1  |
| RS | Morro Redondo           | 6.609  | 29  | 10  | 28  | 9   | 3  | 1  |
| RS | Morro Reuter            | 6.570  | 29  | 10  | 28  | 9   | 3  | 1  |
| RS | Mostardas               | 12.888 | 56  | 20  | 54  | 17  | 5  | 2  |
| RS | Muçum                   | 4.967  | 22  | 8   | 21  | 7   | 2  | 1  |
| RS | Muitos Capões           | 3.184  | 14  | 5   | 14  | 5   | 2  | 1  |
| RS | Muliterno               | 1.901  | 9   | 3   | 8   | 3   | 1  | 1  |
| RS | Não-Me-Toque            | 17.886 | 77  | 27  | 74  | 24  | 7  | 3  |
| RS | Nicolau Vergueiro       | 1.667  | 8   | 3   | 7   | 3   | 1  | 1  |
| RS | Nonoai                  | 11.574 | 50  | 18  | 48  | 16  | 5  | 2  |
| RS | Nova Alvorada           | 3.698  | 16  | 6   | 16  | 5   | 2  | 1  |
| RS | Nova Araçá              | 4.890  | 22  | 8   | 21  | 7   | 2  | 1  |
| RS | Nova Bassano            | 10.089 | 44  | 16  | 42  | 14  | 4  | 2  |
| RS | Nova Boa Vista          | 1.731  | 8   | 3   | 8   | 3   | 1  | 1  |
| RS | Nova Bréscea            | 3.345  | 15  | 5   | 14  | 5   | 2  | 1  |
| RS | Nova Candelária         | 2.677  | 12  | 4   | 12  | 4   | 2  | 1  |

|    |                       |           |      |      |      |      |     |     |
|----|-----------------------|-----------|------|------|------|------|-----|-----|
| RS | Nova Esperança do Sul | 5.465     | 24   | 9    | 23   | 8    | 3   | 1   |
| RS | Nova Hartz            | 22.147    | 96   | 33   | 92   | 29   | 9   | 4   |
| RS | Nova Pádua            | 2.563     | 12   | 4    | 11   | 4    | 1   | 1   |
| RS | Nova Palma            | 6.519     | 29   | 10   | 27   | 9    | 3   | 1   |
| RS | Nova Petrópolis       | 21.717    | 94   | 33   | 90   | 29   | 9   | 3   |
| RS | Nova Prata            | 28.021    | 121  | 42   | 116  | 37   | 11  | 4   |
| RS | Nova Ramada           | 2.195     | 10   | 4    | 10   | 3    | 1   | 1   |
| RS | Nova Roma do Sul      | 3.743     | 17   | 6    | 16   | 5    | 2   | 1   |
| RS | Nova Santa Rita       | 30.482    | 132  | 46   | 126  | 40   | 12  | 5   |
| RS | Novo Cabrais          | 4.246     | 19   | 7    | 18   | 6    | 2   | 1   |
| RS | Novo Hamburgo         | 247.303   | 1064 | 369  | 1022 | 321  | 95  | 34  |
| RS | Novo Machado          | 3.191     | 14   | 5    | 14   | 5    | 2   | 1   |
| RS | Novo Tiradentes       | 2.189     | 10   | 4    | 10   | 3    | 1   | 1   |
| RS | Novo Xingu            | 1.705     | 8    | 3    | 8    | 3    | 1   | 1   |
| RS | Novo Barreiro         | 4.185     | 18   | 7    | 18   | 6    | 2   | 1   |
| RS | Osório                | 46.815    | 202  | 70   | 194  | 61   | 18  | 7   |
| RS | Paim Filho            | 3.731     | 17   | 6    | 16   | 5    | 2   | 1   |
| RS | Palmares do Sul       | 11.342    | 49   | 17   | 47   | 15   | 5   | 2   |
| RS | Palmeira das Missões  | 32.967    | 142  | 50   | 137  | 43   | 13  | 5   |
| RS | Palmitinho            | 7.056     | 31   | 11   | 30   | 10   | 3   | 1   |
| RS | Panambi               | 44.583    | 192  | 67   | 185  | 58   | 18  | 7   |
| RS | Pantano Grande        | 8.995     | 39   | 14   | 38   | 12   | 4   | 2   |
| RS | Paráí                 | 7.793     | 34   | 12   | 33   | 11   | 3   | 2   |
| RS | Paraíso do Sul        | 7.635     | 33   | 12   | 32   | 10   | 3   | 2   |
| RS | Pareci Novo           | 3.885     | 17   | 6    | 17   | 6    | 2   | 1   |
| RS | Parobé                | 59.419    | 256  | 89   | 246  | 78   | 23  | 9   |
| RS | Passa Sete            | 5.790     | 25   | 9    | 24   | 8    | 3   | 1   |
| RS | Passo do Sobrado      | 6.612     | 29   | 10   | 28   | 9    | 3   | 1   |
| RS | Passo Fundo           | 206.103   | 887  | 307  | 852  | 268  | 79  | 29  |
| RS | Paulo Bento           | 2.303     | 10   | 4    | 10   | 3    | 1   | 1   |
| RS | Paverama              | 8.541     | 37   | 13   | 36   | 12   | 4   | 2   |
| RS | Pedras Altas          | 1.928     | 9    | 3    | 8    | 3    | 1   | 1   |
| RS | Pedro Osório          | 7.683     | 34   | 12   | 32   | 10   | 3   | 2   |
| RS | Pejuçara              | 3.840     | 17   | 6    | 16   | 5    | 2   | 1   |
| RS | Pelotas               | 343.826   | 1479 | 512  | 1421 | 447  | 132 | 48  |
| RS | Picada Café           | 5.780     | 25   | 9    | 24   | 8    | 3   | 1   |
| RS | Pinhal                | 2.581     | 12   | 4    | 11   | 4    | 1   | 1   |
| RS | Pinhal da Serra       | 1.896     | 9    | 3    | 8    | 3    | 1   | 1   |
| RS | Pinhal Grande         | 4.309     | 19   | 7    | 18   | 6    | 2   | 1   |
| RS | Pinheirinho do Vale   | 4.926     | 22   | 8    | 21   | 7    | 2   | 1   |
| RS | Pinheiro Machado      | 12.122    | 53   | 19   | 51   | 16   | 5   | 2   |
| RS | Pinto Bandeira        | 3.068     | 14   | 5    | 13   | 4    | 2   | 1   |
| RS | Pirapó                | 2.205     | 10   | 4    | 10   | 3    | 1   | 1   |
| RS | Piratini              | 20.743    | 90   | 31   | 86   | 27   | 8   | 3   |
| RS | Planalto              | 9.957     | 43   | 15   | 42   | 13   | 4   | 2   |
| RS | Poço das Antas        | 2.105     | 10   | 4    | 9    | 3    | 1   | 1   |
| RS | Pontão                | 3.898     | 17   | 6    | 17   | 6    | 2   | 1   |
| RS | Ponte Preta           | 1.501     | 7    | 3    | 7    | 2    | 1   | 1   |
| RS | Portão                | 38.081    | 164  | 57   | 158  | 50   | 15  | 6   |
| RS | Porto Alegre          | 1.492.530 | 6419 | 2223 | 6167 | 1937 | 571 | 205 |
| RS | Porto Lucena          | 4.514     | 20   | 7    | 19   | 6    | 2   | 1   |
| RS | Porto Mauá            | 2.332     | 11   | 4    | 10   | 4    | 1   | 1   |
| RS | Porto Vera Cruz       | 1.258     | 6    | 2    | 6    | 2    | 1   | 1   |
| RS | Porto Xavier          | 10.144    | 44   | 16   | 42   | 14   | 4   | 2   |
| RS | Pouso Novo            | 1.586     | 7    | 3    | 7    | 3    | 1   | 1   |
| RS | Presidente Lucena     | 2.972     | 13   | 5    | 13   | 4    | 2   | 1   |
| RS | Progresso             | 6.235     | 27   | 10   | 26   | 9    | 3   | 1   |
| RS | Protásio Alves        | 1.929     | 9    | 3    | 8    | 3    | 1   | 1   |
| RS | Putinga               | 3.861     | 17   | 6    | 16   | 6    | 2   | 1   |
| RS | Quaraí                | 22.531    | 97   | 34   | 94   | 30   | 9   | 4   |
| RS | Quatro Irmãos         | 1.860     | 8    | 3    | 8    | 3    | 1   | 1   |
| RS | Quevedos              | 2.793     | 13   | 5    | 12   | 4    | 2   | 1   |
| RS | Quinze de Novembro    | 3.810     | 17   | 6    | 16   | 5    | 2   | 1   |
| RS | Redentora             | 11.782    | 51   | 18   | 49   | 16   | 5   | 2   |
| RS | Relvado               | 2.068     | 9    | 4    | 9    | 3    | 1   | 1   |
| RS | Restinga Sêca         | 15.702    | 68   | 24   | 65   | 21   | 6   | 3   |

|    |                           |         |      |     |      |     |     |    |
|----|---------------------------|---------|------|-----|------|-----|-----|----|
| RS | Rio dos Índios            | 2.571   | 12   | 4   | 11   | 4   | 1   | 1  |
| RS | Rio Grande                | 212.881 | 916  | 317 | 880  | 277 | 82  | 30 |
| RS | Rio Pardo                 | 38.257  | 165  | 57  | 159  | 50  | 15  | 6  |
| RS | Riozinho                  | 4.698   | 21   | 7   | 20   | 7   | 2   | 1  |
| RS | Roca Sales                | 11.556  | 50   | 18  | 48   | 15  | 5   | 2  |
| RS | Rodeio Bonito             | 5.868   | 26   | 9   | 25   | 8   | 3   | 1  |
| RS | Rolador                   | 2.270   | 10   | 4   | 10   | 3   | 1   | 1  |
| RS | Rolante                   | 21.591  | 93   | 33  | 90   | 29  | 9   | 3  |
| RS | Ronda Alta                | 10.633  | 46   | 16  | 44   | 14  | 5   | 2  |
| RS | Rondinha                  | 5.033   | 22   | 8   | 21   | 7   | 2   | 1  |
| RS | Roque Gonzales            | 6.750   | 30   | 11  | 28   | 9   | 3   | 1  |
| RS | Rosário do Sul            | 39.210  | 169  | 59  | 163  | 51  | 15  | 6  |
| RS | Sagrada Família           | 2.601   | 12   | 4   | 11   | 4   | 1   | 1  |
| RS | Saldanha Marinho          | 2.596   | 12   | 4   | 11   | 4   | 1   | 1  |
| RS | Salto do Jacuí            | 12.512  | 54   | 19  | 52   | 17  | 5   | 2  |
| RS | Salvador das Missões      | 2.734   | 12   | 5   | 12   | 4   | 2   | 1  |
| RS | Salvador do Sul           | 7.975   | 35   | 12  | 33   | 11  | 4   | 2  |
| RS | Sananduva                 | 16.382  | 71   | 25  | 68   | 22  | 7   | 3  |
| RS | Santa Bárbara do Sul      | 7.813   | 34   | 12  | 33   | 11  | 3   | 2  |
| RS | Santa Cecília do Sul      | 1.630   | 8    | 3   | 7    | 3   | 1   | 1  |
| RS | Santa Clara do Sul        | 6.755   | 30   | 11  | 28   | 9   | 3   | 1  |
| RS | Santa Cruz do Sul         | 132.271 | 569  | 197 | 547  | 172 | 51  | 19 |
| RS | Santa Maria               | 285.159 | 1227 | 425 | 1179 | 370 | 109 | 40 |
| RS | Santa Maria do Herval     | 6.382   | 28   | 10  | 27   | 9   | 3   | 1  |
| RS | Santa Margarida do Sul    | 2.593   | 12   | 4   | 11   | 4   | 1   | 1  |
| RS | Santana da Boa Vista      | 8.037   | 35   | 12  | 34   | 11  | 4   | 2  |
| RS | Sant'Ana do Livramento    | 75.647  | 326  | 113 | 313  | 99  | 29  | 11 |
| RS | Santa Rosa                | 73.882  | 318  | 111 | 306  | 96  | 29  | 11 |
| RS | Santa Tereza              | 1.722   | 8    | 3   | 8    | 3   | 1   | 1  |
| RS | Santa Vitória do Palmar   | 29.298  | 126  | 44  | 122  | 39  | 12  | 5  |
| RS | Santiago                  | 49.298  | 213  | 74  | 204  | 64  | 19  | 7  |
| RS | Santo Ângelo              | 77.544  | 334  | 116 | 321  | 101 | 30  | 11 |
| RS | Santo Antônio do Palma    | 2.118   | 10   | 4   | 9    | 3   | 1   | 1  |
| RS | Santo Antônio da Patrulha | 43.397  | 187  | 65  | 180  | 57  | 17  | 6  |
| RS | Santo Antônio das Missões | 9.930   | 43   | 15  | 42   | 13  | 4   | 2  |
| RS | Santo Antônio do Planalto | 2.018   | 9    | 4   | 9    | 3   | 1   | 1  |
| RS | Santo Augusto             | 13.813  | 60   | 21  | 58   | 18  | 6   | 2  |
| RS | Santo Cristo              | 14.177  | 61   | 22  | 59   | 19  | 6   | 2  |
| RS | Santo Expedito do Sul     | 2.287   | 10   | 4   | 10   | 3   | 1   | 1  |
| RS | São Borja                 | 59.768  | 258  | 89  | 247  | 78  | 23  | 9  |
| RS | São Domingos do Sul       | 3.091   | 14   | 5   | 13   | 5   | 2   | 1  |
| RS | São Francisco de Assis    | 18.081  | 78   | 27  | 75   | 24  | 7   | 3  |
| RS | São Francisco de Paula    | 21.871  | 95   | 33  | 91   | 29  | 9   | 3  |
| RS | São Gabriel               | 62.187  | 268  | 93  | 257  | 81  | 24  | 9  |
| RS | São Jerônimo              | 24.569  | 106  | 37  | 102  | 32  | 10  | 4  |
| RS | São João da Urtiga        | 4.625   | 20   | 7   | 20   | 7   | 2   | 1  |
| RS | São João do Polêsine      | 2.535   | 11   | 4   | 11   | 4   | 1   | 1  |
| RS | São Jorge                 | 2.808   | 13   | 5   | 12   | 4   | 2   | 1  |
| RS | São José das Missões      | 2.491   | 11   | 4   | 11   | 4   | 1   | 1  |
| RS | São José do Herval        | 1.917   | 9    | 3   | 8    | 3   | 1   | 1  |
| RS | São José do Hortêncio     | 4.924   | 22   | 8   | 21   | 7   | 2   | 1  |
| RS | São José do Inhacorá      | 2.040   | 9    | 4   | 9    | 3   | 1   | 1  |
| RS | São José do Norte         | 27.866  | 120  | 42  | 116  | 37  | 11  | 4  |
| RS | São José do Ouro          | 6.911   | 30   | 11  | 29   | 9   | 3   | 1  |
| RS | São José do Sul           | 2.464   | 11   | 4   | 11   | 4   | 1   | 1  |
| RS | São José dos Ausentes     | 3.559   | 16   | 6   | 15   | 5   | 2   | 1  |
| RS | São Leopoldo              | 240.378 | 1034 | 358 | 994  | 312 | 92  | 33 |
| RS | São Lourenço do Sul       | 43.501  | 188  | 65  | 180  | 57  | 17  | 6  |
| RS | São Luiz Gonzaga          | 33.124  | 143  | 50  | 137  | 43  | 13  | 5  |
| RS | São Marcos                | 21.756  | 94   | 33  | 90   | 29  | 9   | 3  |
| RS | São Martinho              | 5.336   | 23   | 8   | 23   | 7   | 3   | 1  |
| RS | São Martinho da Serra     | 3.228   | 14   | 5   | 14   | 5   | 2   | 1  |
| RS | São Miguel das Missões    | 7.692   | 34   | 12  | 32   | 10  | 3   | 2  |
| RS | São Nicolau               | 5.153   | 23   | 8   | 22   | 7   | 2   | 1  |
| RS | São Paulo das Missões     | 5.654   | 25   | 9   | 24   | 8   | 3   | 1  |
| RS | São Pedro da Serra        | 3.881   | 17   | 6   | 17   | 6   | 2   | 1  |

|    |                       |         |     |     |     |     |    |    |
|----|-----------------------|---------|-----|-----|-----|-----|----|----|
| RS | São Pedro das Missões | 2.025   | 9   | 4   | 9   | 3   | 1  | 1  |
| RS | São Pedro do Butiá    | 2.950   | 13  | 5   | 13  | 4   | 2  | 1  |
| RS | São Pedro do Sul      | 16.100  | 70  | 24  | 67  | 21  | 7  | 3  |
| RS | São Sebastião do Cai  | 26.161  | 113 | 39  | 109 | 34  | 10 | 4  |
| RS | São Sepé              | 23.492  | 102 | 35  | 98  | 31  | 9  | 4  |
| RS | São Valentim          | 3.220   | 14  | 5   | 14  | 5   | 2  | 1  |
| RS | São Valentim do Sul   | 2.248   | 10  | 4   | 10  | 3   | 1  | 1  |
| RS | São Valério do Sul    | 2.732   | 12  | 5   | 12  | 4   | 2  | 1  |
| RS | São Vendelino         | 2.288   | 10  | 4   | 10  | 3   | 1  | 1  |
| RS | São Vicente do Sul    | 8.742   | 38  | 14  | 37  | 12  | 4  | 2  |
| RS | Sapiranga             | 80.514  | 347 | 120 | 333 | 105 | 31 | 12 |
| RS | Sapucaia do Sul       | 142.508 | 613 | 213 | 589 | 185 | 55 | 20 |
| RS | Sarandi               | 25.024  | 108 | 38  | 104 | 33  | 10 | 4  |
| RS | Seberí                | 10.678  | 46  | 16  | 45  | 14  | 5  | 2  |
| RS | Sede Nova             | 2.875   | 13  | 5   | 12  | 4   | 2  | 1  |
| RS | Segredo               | 7.465   | 33  | 12  | 31  | 10  | 3  | 2  |
| RS | Selbach               | 5.114   | 22  | 8   | 22  | 7   | 2  | 1  |
| RS | Senador Salgado Filho | 2.761   | 12  | 5   | 12  | 4   | 2  | 1  |
| RS | Sentinela do Sul      | 5.635   | 25  | 9   | 24  | 8   | 3  | 1  |
| RS | Serafina Corrêa       | 18.074  | 78  | 27  | 75  | 24  | 7  | 3  |
| RS | Sério                 | 1.889   | 9   | 3   | 8   | 3   | 1  | 1  |
| RS | Sertão                | 5.220   | 23  | 8   | 22  | 7   | 2  | 1  |
| RS | Sertão Santana        | 6.586   | 29  | 10  | 28  | 9   | 3  | 1  |
| RS | Sete de Setembro      | 1.931   | 9   | 3   | 8   | 3   | 1  | 1  |
| RS | Severiano de Almeida  | 3.607   | 16  | 6   | 15  | 5   | 2  | 1  |
| RS | Silveira Martins      | 2.365   | 11  | 4   | 10  | 4   | 1  | 1  |
| RS | Sinimbu               | 10.152  | 44  | 16  | 42  | 14  | 4  | 2  |
| RS | Sobradinho            | 15.041  | 65  | 23  | 63  | 20  | 6  | 3  |
| RS | Soledade              | 31.067  | 134 | 47  | 129 | 41  | 12 | 5  |
| RS | Tabaí                 | 4.816   | 21  | 8   | 20  | 7   | 2  | 1  |
| RS | Tapejara              | 24.973  | 108 | 38  | 104 | 33  | 10 | 4  |
| RS | Tapera                | 10.569  | 46  | 16  | 44  | 14  | 5  | 2  |
| RS | Tapes                 | 17.363  | 75  | 26  | 72  | 23  | 7  | 3  |
| RS | Taquara               | 57.740  | 249 | 86  | 239 | 75  | 23 | 8  |
| RS | Taquari               | 26.907  | 116 | 41  | 112 | 35  | 11 | 4  |
| RS | Taquaruçu do Sul      | 3.081   | 14  | 5   | 13  | 4   | 2  | 1  |
| RS | Tavares               | 5.484   | 24  | 9   | 23  | 8   | 3  | 1  |
| RS | Tenente Portela       | 13.385  | 58  | 20  | 56  | 18  | 6  | 2  |
| RS | Terra de Areia        | 11.323  | 49  | 17  | 47  | 15  | 5  | 2  |
| RS | Teutônia              | 34.275  | 148 | 52  | 142 | 45  | 14 | 5  |
| RS | Tio Hugo              | 3.078   | 14  | 5   | 13  | 4   | 2  | 1  |
| RS | Tiradentes do Sul     | 5.532   | 24  | 9   | 23  | 8   | 3  | 1  |
| RS | Toropi                | 2.753   | 12  | 5   | 12  | 4   | 2  | 1  |
| RS | Torres                | 39.381  | 170 | 59  | 163 | 52  | 16 | 6  |
| RS | Tramandaí             | 53.507  | 231 | 80  | 222 | 70  | 21 | 8  |
| RS | Travesseiro           | 2.331   | 11  | 4   | 10  | 4   | 1  | 1  |
| RS | Três Arroios          | 2.620   | 12  | 4   | 11  | 4   | 2  | 1  |
| RS | Três Cachoeiras       | 11.174  | 49  | 17  | 47  | 15  | 5  | 2  |
| RS | Três Coroas           | 28.948  | 125 | 44  | 120 | 38  | 12 | 4  |
| RS | Três de Maio          | 23.846  | 103 | 36  | 99  | 31  | 10 | 4  |
| RS | Três Forquilhas       | 2.643   | 12  | 4   | 11  | 4   | 2  | 1  |
| RS | Três Palmeiras        | 4.232   | 19  | 7   | 18  | 6   | 2  | 1  |
| RS | Três Passos           | 23.799  | 103 | 36  | 99  | 31  | 10 | 4  |
| RS | Trindade do Sul       | 5.781   | 25  | 9   | 24  | 8   | 3  | 1  |
| RS | Triunfo               | 30.159  | 130 | 45  | 125 | 40  | 12 | 5  |
| RS | Tucunduva             | 5.612   | 25  | 9   | 24  | 8   | 3  | 1  |
| RS | Tunas                 | 4.585   | 20  | 7   | 19  | 6   | 2  | 1  |
| RS | Tupanci do Sul        | 1.447   | 7   | 3   | 6   | 2   | 1  | 1  |
| RS | Tupanciretã           | 24.182  | 104 | 37  | 100 | 32  | 10 | 4  |
| RS | Tupandi               | 5.019   | 22  | 8   | 21  | 7   | 2  | 1  |
| RS | Tuparendi             | 7.730   | 34  | 12  | 32  | 11  | 3  | 2  |
| RS | Turuçu                | 3.408   | 15  | 6   | 15  | 5   | 2  | 1  |
| RS | Ubiretama             | 1.952   | 9   | 3   | 9   | 3   | 1  | 1  |
| RS | União da Serra        | 1.084   | 5   | 2   | 5   | 2   | 1  | 1  |
| RS | Unistalda             | 2.306   | 10  | 4   | 10  | 3   | 1  | 1  |
| RS | Uruguaiana            | 126.766 | 546 | 189 | 524 | 165 | 49 | 18 |

|    |                       |         |      |      |      |      |     |     |
|----|-----------------------|---------|------|------|------|------|-----|-----|
| RS | Vacaria               | 66.916  | 288  | 100  | 277  | 87   | 26  | 10  |
| RS | Vale Verde            | 3.531   | 16   | 6    | 15   | 5    | 2   | 1   |
| RS | Vale do Sol           | 11.873  | 52   | 18   | 50   | 16   | 5   | 2   |
| RS | Vale Real             | 6.046   | 27   | 10   | 25   | 8    | 3   | 1   |
| RS | Vanini                | 2.130   | 10   | 4    | 9    | 3    | 1   | 1   |
| RS | Venâncio Aires        | 72.373  | 312  | 108  | 300  | 94   | 28  | 10  |
| RS | Vera Cruz             | 27.325  | 118  | 41   | 113  | 36   | 11  | 4   |
| RS | Veranópolis           | 26.813  | 116  | 40   | 111  | 35   | 11  | 4   |
| RS | Vespasiano Corrêa     | 1.776   | 8    | 3    | 8    | 3    | 1   | 1   |
| RS | Viadutos              | 4.628   | 20   | 7    | 20   | 7    | 2   | 1   |
| RS | Viamão                | 257.330 | 1107 | 384  | 1064 | 334  | 99  | 36  |
| RS | Vicente Dutra         | 4.530   | 20   | 7    | 19   | 6    | 2   | 1   |
| RS | Victor Graeff         | 2.840   | 13   | 5    | 12   | 4    | 2   | 1   |
| RS | Vila Flores           | 3.407   | 15   | 6    | 15   | 5    | 2   | 1   |
| RS | Vila Lângaro          | 2.070   | 9    | 4    | 9    | 3    | 1   | 1   |
| RS | Vila Maria            | 4.368   | 19   | 7    | 19   | 6    | 2   | 1   |
| RS | Vila Nova do Sul      | 4.274   | 19   | 7    | 18   | 6    | 2   | 1   |
| RS | Vista Alegre          | 2.726   | 12   | 5    | 12   | 4    | 2   | 1   |
| RS | Vista Alegre do Prata | 1.553   | 7    | 3    | 7    | 3    | 1   | 1   |
| RS | Vista Gaúcha          | 2.858   | 13   | 5    | 12   | 4    | 2   | 1   |
| RS | Vitória das Missões   | 3.052   | 14   | 5    | 13   | 4    | 2   | 1   |
| RS | Westfália             | 3.046   | 14   | 5    | 13   | 4    | 2   | 1   |
| RS | Xangri-lá             | 17.126  | 74   | 26   | 71   | 23   | 7   | 3   |
| MS | Água Clara            | 16.025  | 65   | 23   | 63   | 20   | 6   | 3   |
| MS | Alcinópolis           | 5.489   | 23   | 8    | 22   | 7    | 2   | 1   |
| MS | Amambai               | 40.247  | 163  | 57   | 157  | 50   | 15  | 6   |
| MS | Anastácio             | 25.336  | 103  | 36   | 99   | 31   | 10  | 4   |
| MS | Anaurilândia          | 9.116   | 37   | 13   | 36   | 12   | 4   | 2   |
| MS | Angélica              | 11.081  | 45   | 16   | 44   | 14   | 4   | 2   |
| MS | Antônio João          | 9.082   | 37   | 13   | 36   | 12   | 4   | 2   |
| MS | Aparecida do Taboado  | 26.386  | 107  | 37   | 103  | 33   | 10  | 4   |
| MS | Aquidauana            | 48.184  | 196  | 68   | 188  | 59   | 18  | 7   |
| MS | Aral Moreira          | 12.511  | 51   | 18   | 49   | 16   | 5   | 2   |
| MS | Bandeirantes          | 7.281   | 30   | 11   | 29   | 9    | 3   | 1   |
| MS | Bataguassu            | 23.620  | 96   | 34   | 92   | 29   | 9   | 4   |
| MS | Batayporã             | 11.368  | 47   | 16   | 45   | 14   | 5   | 2   |
| MS | Bela Vista            | 24.842  | 101  | 35   | 97   | 31   | 9   | 4   |
| MS | Bodoquena             | 7.802   | 32   | 11   | 31   | 10   | 3   | 2   |
| MS | Bonito                | 22.401  | 91   | 32   | 88   | 28   | 9   | 3   |
| MS | Brasilândia           | 11.835  | 48   | 17   | 47   | 15   | 5   | 2   |
| MS | Caarapó               | 31.005  | 126  | 44   | 121  | 38   | 12  | 4   |
| MS | Camapuã               | 13.675  | 56   | 20   | 54   | 17   | 5   | 2   |
| MS | Campo Grande          | 916.001 | 3708 | 1284 | 3563 | 1119 | 330 | 119 |
| MS | Caracol               | 6.247   | 26   | 9    | 25   | 8    | 3   | 1   |
| MS | Cassilândia           | 22.063  | 90   | 31   | 86   | 27   | 8   | 3   |
| MS | Chapadão do Sul       | 26.499  | 108  | 38   | 104  | 33   | 10  | 4   |
| MS | Corguinho             | 6.158   | 25   | 9    | 24   | 8    | 3   | 1   |
| MS | Coronel Sapucaia      | 15.449  | 63   | 22   | 61   | 19   | 6   | 2   |
| MS | Corumbá               | 112.669 | 457  | 158  | 439  | 138  | 41  | 15  |
| MS | Costa Rica            | 21.456  | 87   | 31   | 84   | 27   | 8   | 3   |
| MS | Coxim                 | 33.547  | 136  | 48   | 131  | 41   | 13  | 5   |
| MS | Deodápolis            | 13.043  | 53   | 19   | 51   | 16   | 5   | 2   |
| MS | Dois Irmãos do Buriti | 11.547  | 47   | 17   | 45   | 15   | 5   | 2   |
| MS | Douradina             | 6.025   | 25   | 9    | 24   | 8    | 3   | 1   |
| MS | Dourados              | 227.990 | 923  | 320  | 887  | 279  | 82  | 30  |
| MS | Eldorado              | 12.447  | 51   | 18   | 49   | 16   | 5   | 2   |
| MS | Fátima do Sul         | 19.152  | 78   | 27   | 75   | 24   | 7   | 3   |
| MS | Figueirão             | 3.066   | 13   | 5    | 12   | 4    | 2   | 1   |
| MS | Glória de Dourados    | 9.934   | 41   | 14   | 39   | 13   | 4   | 2   |
| MS | Guia Lopes da Laguna  | 9.754   | 40   | 14   | 38   | 12   | 4   | 2   |
| MS | Iguatemi              | 16.273  | 66   | 23   | 64   | 20   | 6   | 3   |
| MS | Inocência             | 7.566   | 31   | 11   | 30   | 10   | 3   | 1   |
| MS | Itaporã               | 25.478  | 104  | 36   | 100  | 32   | 10  | 4   |
| MS | Itaquiraí             | 21.604  | 88   | 31   | 85   | 27   | 8   | 3   |
| MS | Ivinhema              | 23.277  | 95   | 33   | 91   | 29   | 9   | 4   |
| MS | Japorã                | 9.372   | 38   | 14   | 37   | 12   | 4   | 2   |

|    |                          |         |     |     |     |     |    |    |
|----|--------------------------|---------|-----|-----|-----|-----|----|----|
| MS | Jaraguari                | 7.342   | 30  | 11  | 29  | 9   | 3  | 1  |
| MS | Jardim                   | 26.375  | 107 | 37  | 103 | 33  | 10 | 4  |
| MS | Jateí                    | 4.015   | 17  | 6   | 16  | 5   | 2  | 1  |
| MS | Juti                     | 6.861   | 28  | 10  | 27  | 9   | 3  | 1  |
| MS | Ladário                  | 24.040  | 98  | 34  | 94  | 30  | 9  | 4  |
| MS | Laguna Carapã            | 7.496   | 31  | 11  | 30  | 10  | 3  | 1  |
| MS | Maracaju                 | 48.944  | 199 | 69  | 191 | 60  | 18 | 7  |
| MS | Miranda                  | 28.423  | 116 | 40  | 111 | 35  | 11 | 4  |
| MS | Mundo Novo               | 18.578  | 76  | 27  | 73  | 23  | 7  | 3  |
| MS | Naviraí                  | 56.484  | 229 | 80  | 220 | 69  | 21 | 8  |
| MS | Nioaque                  | 13.794  | 56  | 20  | 54  | 17  | 5  | 2  |
| MS | Nova Alvorada do Sul     | 22.967  | 93  | 33  | 90  | 29  | 9  | 3  |
| MS | Nova Andradina           | 56.057  | 227 | 79  | 218 | 69  | 21 | 8  |
| MS | Novo Horizonte do Sul    | 3.556   | 15  | 5   | 14  | 5   | 2  | 1  |
| MS | Paraíso das Águas        | 5.751   | 24  | 9   | 23  | 8   | 3  | 1  |
| MS | Paranaíba                | 42.401  | 172 | 60  | 165 | 52  | 16 | 6  |
| MS | Paranhos                 | 14.576  | 59  | 21  | 57  | 18  | 6  | 2  |
| MS | Pedro Gomes              | 7.568   | 31  | 11  | 30  | 10  | 3  | 1  |
| MS | Ponta Porã               | 95.320  | 386 | 134 | 371 | 117 | 35 | 13 |
| MS | Porto Murtinho           | 17.460  | 71  | 25  | 68  | 22  | 7  | 3  |
| MS | Ribas do Rio Pardo       | 25.310  | 103 | 36  | 99  | 31  | 10 | 4  |
| MS | Rio Brilhante            | 38.844  | 158 | 55  | 152 | 48  | 14 | 6  |
| MS | Rio Negro                | 4.758   | 20  | 7   | 19  | 6   | 2  | 1  |
| MS | Rio Verde de Mato Grosso | 20.025  | 82  | 29  | 78  | 25  | 8  | 3  |
| MS | Rochedo                  | 5.120   | 21  | 8   | 20  | 7   | 2  | 1  |
| MS | Santa Rita do Pardo      | 7.948   | 33  | 12  | 31  | 10  | 3  | 2  |
| MS | São Gabriel do Oeste     | 27.660  | 112 | 39  | 108 | 34  | 10 | 4  |
| MS | Sete Quedas              | 10.751  | 44  | 16  | 42  | 14  | 4  | 2  |
| MS | Selvíria                 | 6.555   | 27  | 10  | 26  | 9   | 3  | 1  |
| MS | Sidrolândia              | 60.792  | 247 | 86  | 237 | 75  | 22 | 8  |
| MS | Sonora                   | 20.158  | 82  | 29  | 79  | 25  | 8  | 3  |
| MS | Tacuru                   | 11.795  | 48  | 17  | 46  | 15  | 5  | 2  |
| MS | Taquarussu               | 3.588   | 15  | 6   | 14  | 5   | 2  | 1  |
| MS | Terenos                  | 22.721  | 92  | 32  | 89  | 28  | 9  | 3  |
| MS | Três Lagoas              | 125.137 | 507 | 176 | 487 | 153 | 46 | 17 |
| MS | Vicentina                | 6.115   | 25  | 9   | 24  | 8   | 3  | 1  |
| MT | Acorizal                 | 5.309   | 21  | 8   | 21  | 7   | 2  | 1  |
| MT | Água Boa                 | 26.679  | 106 | 37  | 102 | 32  | 10 | 4  |
| MT | Alta Floresta            | 52.105  | 206 | 72  | 198 | 63  | 19 | 7  |
| MT | Alto Araguaia            | 19.714  | 78  | 27  | 75  | 24  | 7  | 3  |
| MT | Alto Boa Vista           | 7.092   | 29  | 10  | 27  | 9   | 3  | 1  |
| MT | Alto Garças              | 12.323  | 49  | 17  | 47  | 15  | 5  | 2  |
| MT | Alto Paraguai            | 11.587  | 46  | 16  | 45  | 14  | 5  | 2  |
| MT | Alto Taquari             | 11.413  | 46  | 16  | 44  | 14  | 5  | 2  |
| MT | Apiacás                  | 10.431  | 42  | 15  | 40  | 13  | 4  | 2  |
| MT | Araguaiana               | 3.064   | 13  | 5   | 12  | 4   | 2  | 1  |
| MT | Araguaína                | 909     | 4   | 2   | 4   | 2   | 1  | 1  |
| MT | Araputanga               | 17.078  | 68  | 24  | 65  | 21  | 6  | 3  |
| MT | Arenápolis               | 9.399   | 38  | 13  | 36  | 12  | 4  | 2  |
| MT | Aripuanã                 | 23.067  | 92  | 32  | 88  | 28  | 9  | 3  |
| MT | Barão de Melgaço         | 8.165   | 33  | 12  | 32  | 10  | 3  | 2  |
| MT | Barra do Bugres          | 35.642  | 141 | 49  | 136 | 43  | 13 | 5  |
| MT | Barra do Garças          | 61.702  | 244 | 85  | 235 | 74  | 22 | 8  |
| MT | Bom Jesus do Araguaia    | 6.830   | 28  | 10  | 26  | 9   | 3  | 1  |
| MT | Brasnorte                | 20.571  | 82  | 29  | 79  | 25  | 8  | 3  |
| MT | Cáceres                  | 95.339  | 377 | 131 | 363 | 114 | 34 | 13 |
| MT | Campinápolis             | 16.223  | 65  | 23  | 62  | 20  | 6  | 3  |
| MT | Campo Novo do Parecis    | 36.917  | 146 | 51  | 141 | 45  | 13 | 5  |
| MT | Campo Verde              | 44.033  | 175 | 61  | 168 | 53  | 16 | 6  |
| MT | Campos de Júlio          | 7.245   | 29  | 10  | 28  | 9   | 3  | 1  |
| MT | Canabrava do Norte       | 4.711   | 19  | 7   | 18  | 6   | 2  | 1  |
| MT | Canarana                 | 22.101  | 88  | 31  | 84  | 27  | 8  | 3  |
| MT | Carlinda                 | 10.094  | 40  | 14  | 39  | 13  | 4  | 2  |
| MT | Castanheira              | 8.782   | 35  | 13  | 34  | 11  | 4  | 2  |
| MT | Chapada dos Guimarães    | 22.521  | 90  | 31  | 86  | 27  | 8  | 3  |
| MT | Cláudia                  | 12.338  | 49  | 17  | 47  | 15  | 5  | 2  |

|    |                              |         |      |     |      |     |     |    |
|----|------------------------------|---------|------|-----|------|-----|-----|----|
| MT | Cocalinho                    | 5.716   | 23   | 8   | 22   | 7   | 3   | 1  |
| MT | Colíder                      | 33.855  | 134  | 47  | 129  | 41  | 12  | 5  |
| MT | Colniza                      | 41.117  | 163  | 57  | 157  | 50  | 15  | 6  |
| MT | Comodoro                     | 21.249  | 85   | 30  | 81   | 26  | 8   | 3  |
| MT | Confresa                     | 32.076  | 127  | 44  | 122  | 39  | 12  | 5  |
| MT | Conquista D'Oeste            | 4.163   | 17   | 6   | 16   | 5   | 2   | 1  |
| MT | Cotriguaçu                   | 20.717  | 82   | 29  | 79   | 25  | 8   | 3  |
| MT | Cuiabá                       | 623.614 | 2466 | 854 | 2369 | 744 | 219 | 79 |
| MT | Curvelândia                  | 5.267   | 21   | 8   | 21   | 7   | 2   | 1  |
| MT | Denise                       | 9.626   | 39   | 14  | 37   | 12  | 4   | 2  |
| MT | Diamantino                   | 22.311  | 89   | 31  | 85   | 27  | 8   | 3  |
| MT | Dom Aquino                   | 8.087   | 32   | 12  | 31   | 10  | 3   | 2  |
| MT | Feliz Natal                  | 14.847  | 59   | 21  | 57   | 18  | 6   | 2  |
| MT | Figueirópolis D'Oeste        | 3.411   | 14   | 5   | 13   | 5   | 2   | 1  |
| MT | Gaúcha do Norte              | 7.913   | 32   | 11  | 31   | 10  | 3   | 1  |
| MT | General Carneiro             | 5.726   | 23   | 8   | 22   | 7   | 3   | 1  |
| MT | Glória D'Oeste               | 2.990   | 12   | 5   | 12   | 4   | 2   | 1  |
| MT | Guarantã do Norte            | 36.439  | 145  | 50  | 139  | 44  | 13  | 5  |
| MT | Guiratinga                   | 15.740  | 63   | 22  | 60   | 19  | 6   | 2  |
| MT | Indiavaí                     | 2.806   | 12   | 4   | 11   | 4   | 1   | 1  |
| MT | Ipiranga do Norte            | 8.182   | 33   | 12  | 32   | 10  | 3   | 2  |
| MT | Itanhangá                    | 7.030   | 28   | 10  | 27   | 9   | 3   | 1  |
| MT | Itaúba                       | 3.609   | 15   | 5   | 14   | 5   | 2   | 1  |
| MT | Itiquira                     | 13.727  | 55   | 19  | 53   | 17  | 5   | 2  |
| MT | Jaciara                      | 27.696  | 110  | 38  | 106  | 34  | 10  | 4  |
| MT | Jangada                      | 8.420   | 34   | 12  | 32   | 11  | 3   | 2  |
| MT | Jauru                        | 8.377   | 34   | 12  | 32   | 10  | 3   | 2  |
| MT | Juara                        | 35.275  | 140  | 49  | 134  | 43  | 13  | 5  |
| MT | Juína                        | 41.190  | 163  | 57  | 157  | 50  | 15  | 6  |
| MT | Juruena                      | 16.811  | 67   | 24  | 64   | 21  | 6   | 3  |
| MT | Juscimeira                   | 11.124  | 44   | 16  | 43   | 14  | 4   | 2  |
| MT | Lambari D'Oeste              | 6.246   | 25   | 9   | 24   | 8   | 3   | 1  |
| MT | Lucas do Rio Verde           | 69.671  | 276  | 96  | 265  | 84  | 25  | 9  |
| MT | Luciara                      | 2.036   | 9    | 3   | 8    | 3   | 1   | 1  |
| MT | Vila Bela da Santíssima Trín | 16.412  | 65   | 23  | 63   | 20  | 6   | 3  |
| MT | Marcelândia                  | 10.107  | 40   | 14  | 39   | 13  | 4   | 2  |
| MT | Matupá                       | 17.017  | 68   | 24  | 65   | 21  | 6   | 3  |
| MT | Mirassol d'Oeste             | 28.135  | 112  | 39  | 107  | 34  | 10  | 4  |
| MT | Nobres                       | 15.332  | 61   | 21  | 59   | 19  | 6   | 2  |
| MT | Nortelândia                  | 5.858   | 24   | 9   | 23   | 7   | 3   | 1  |
| MT | Nossa Senhora do Livramen    | 13.093  | 52   | 18  | 50   | 16  | 5   | 2  |
| MT | Nova Bandeirantes            | 16.052  | 64   | 22  | 61   | 20  | 6   | 3  |
| MT | Nova Nazaré                  | 4.013   | 16   | 6   | 16   | 5   | 2   | 1  |
| MT | Nova Lacerda                 | 6.861   | 28   | 10  | 27   | 9   | 3   | 1  |
| MT | Nova Santa Helena            | 3.755   | 15   | 6   | 15   | 5   | 2   | 1  |
| MT | Nova Brasilândia             | 3.656   | 15   | 6   | 14   | 5   | 2   | 1  |
| MT | Nova Canaã do Norte          | 12.876  | 51   | 18  | 49   | 16  | 5   | 2  |
| MT | Nova Mutum                   | 48.222  | 191  | 66  | 184  | 58  | 17  | 7  |
| MT | Nova Olímpia                 | 20.820  | 83   | 29  | 80   | 25  | 8   | 3  |
| MT | Nova Ubiratã                 | 12.492  | 50   | 18  | 48   | 15  | 5   | 2  |
| MT | Nova Xavantina               | 21.695  | 86   | 30  | 83   | 26  | 8   | 3  |
| MT | Novo Mundo                   | 9.545   | 38   | 14  | 37   | 12  | 4   | 2  |
| MT | Novo Horizonte do Norte      | 4.069   | 17   | 6   | 16   | 5   | 2   | 1  |
| MT | Novo São Joaquim             | 4.837   | 20   | 7   | 19   | 6   | 2   | 1  |
| MT | Paranaíta                    | 11.291  | 45   | 16  | 43   | 14  | 4   | 2  |
| MT | Paranatinga                  | 23.250  | 92   | 32  | 89   | 28  | 9   | 3  |
| MT | Novo Santo Antônio           | 2.769   | 11   | 4   | 11   | 4   | 1   | 1  |
| MT | Pedra Preta                  | 17.547  | 70   | 25  | 67   | 21  | 7   | 3  |
| MT | Peixoto de Azevedo           | 35.695  | 142  | 49  | 136  | 43  | 13  | 5  |
| MT | Planalto da Serra            | 2.637   | 11   | 4   | 11   | 4   | 1   | 1  |
| MT | Poconé                       | 33.386  | 132  | 46  | 127  | 40  | 12  | 5  |
| MT | Pontal do Araguaia           | 6.972   | 28   | 10  | 27   | 9   | 3   | 1  |
| MT | Ponte Branca                 | 1.525   | 7    | 3   | 6    | 2   | 1   | 1  |
| MT | Pontes e Lacerda             | 46.105  | 183  | 64  | 176  | 55  | 17  | 6  |
| MT | Porto Alegre do Norte        | 12.849  | 51   | 18  | 49   | 16  | 5   | 2  |
| MT | Porto dos Gaúchos            | 5.344   | 22   | 8   | 21   | 7   | 2   | 1  |



|    |                            |         |      |     |      |     |     |    |
|----|----------------------------|---------|------|-----|------|-----|-----|----|
| MT | Porto Esperidião           | 12.176  | 49   | 17  | 47   | 15  | 5   | 2  |
| MT | Porto Estrela              | 2.794   | 12   | 4   | 11   | 4   | 1   | 1  |
| MT | Poxoréu                    | 15.936  | 63   | 22  | 61   | 20  | 6   | 3  |
| MT | Primavera do Leste         | 63.876  | 253  | 88  | 243  | 77  | 23  | 9  |
| MT | Querência                  | 18.386  | 73   | 26  | 70   | 22  | 7   | 3  |
| MT | São José dos Quatro Marcos | 18.788  | 75   | 26  | 72   | 23  | 7   | 3  |
| MT | Reserva do Cabaçal         | 2.754   | 11   | 4   | 11   | 4   | 1   | 1  |
| MT | Ribeirão Cascalheira       | 10.450  | 42   | 15  | 40   | 13  | 4   | 2  |
| MT | Ribeirãozinho              | 2.439   | 10   | 4   | 10   | 3   | 1   | 1  |
| MT | Rio Branco                 | 5.147   | 21   | 8   | 20   | 7   | 2   | 1  |
| MT | Santa Carmem               | 4.600   | 19   | 7   | 18   | 6   | 2   | 1  |
| MT | Santo Afonso               | 3.164   | 13   | 5   | 13   | 4   | 2   | 1  |
| MT | São José do Povo           | 4.102   | 17   | 6   | 16   | 5   | 2   | 1  |
| MT | São José do Rio Claro      | 21.351  | 85   | 30  | 82   | 26  | 8   | 3  |
| MT | São José do Xingu          | 5.646   | 23   | 8   | 22   | 7   | 2   | 1  |
| MT | São Pedro da Cipa          | 4.823   | 20   | 7   | 19   | 6   | 2   | 1  |
| MT | Rondolândia                | 4.069   | 17   | 6   | 16   | 5   | 2   | 1  |
| MT | Rondonópolis               | 239.613 | 948  | 328 | 911  | 286 | 85  | 31 |
| MT | Rosário Oeste              | 16.999  | 68   | 24  | 65   | 21  | 6   | 3  |
| MT | Santa Cruz do Xingu        | 2.700   | 11   | 4   | 11   | 4   | 1   | 1  |
| MT | Salto do Céu               | 3.226   | 13   | 5   | 13   | 4   | 2   | 1  |
| MT | Santa Rita do Trivelato    | 3.602   | 15   | 5   | 14   | 5   | 2   | 1  |
| MT | Santa Terezinha            | 8.547   | 34   | 12  | 33   | 11  | 3   | 2  |
| MT | Santo Antônio do Leste     | 5.459   | 22   | 8   | 21   | 7   | 2   | 1  |
| MT | Santo Antônio do Leverger  | 17.188  | 68   | 24  | 66   | 21  | 7   | 3  |
| MT | São Félix do Araguaia      | 11.934  | 48   | 17  | 46   | 15  | 5   | 2  |
| MT | Sapezal                    | 27.485  | 109  | 38  | 105  | 33  | 10  | 4  |
| MT | Serra Nova Dourada         | 1.705   | 7    | 3   | 7    | 3   | 1   | 1  |
| MT | Sinop                      | 148.960 | 589  | 204 | 566  | 178 | 53  | 19 |
| MT | Sorriso                    | 94.941  | 376  | 130 | 361  | 114 | 34  | 12 |
| MT | Tabaporã                   | 9.357   | 37   | 13  | 36   | 12  | 4   | 2  |
| MT | Tangará da Serra           | 107.631 | 426  | 148 | 409  | 129 | 38  | 14 |
| MT | Tapurah                    | 14.380  | 57   | 20  | 55   | 18  | 6   | 2  |
| MT | Terra Nova do Norte        | 9.284   | 37   | 13  | 36   | 12  | 4   | 2  |
| MT | Tesouro                    | 3.761   | 15   | 6   | 15   | 5   | 2   | 1  |
| MT | Torixoréu                  | 3.487   | 14   | 5   | 14   | 5   | 2   | 1  |
| MT | União do Sul               | 3.455   | 14   | 5   | 14   | 5   | 2   | 1  |
| MT | Vale de São Domingos       | 3.124   | 13   | 5   | 12   | 4   | 2   | 1  |
| MT | Várzea Grande              | 290.383 | 1148 | 398 | 1103 | 347 | 102 | 37 |
| MT | Vera                       | 11.731  | 47   | 17  | 45   | 14  | 5   | 2  |
| MT | Vila Rica                  | 26.946  | 107  | 37  | 103  | 33  | 10  | 4  |
| MT | Nova Guarita               | 4.407   | 18   | 7   | 17   | 6   | 2   | 1  |
| MT | Nova Marilândia            | 3.332   | 14   | 5   | 13   | 4   | 2   | 1  |
| MT | Nova Maringá               | 9.056   | 36   | 13  | 35   | 11  | 4   | 2  |
| MT | Nova Monte Verde           | 9.375   | 38   | 13  | 36   | 12  | 4   | 2  |
| GO | Abadia de Goiás            | 9.158   | 38   | 13  | 36   | 12  | 4   | 2  |
| GO | Abadiânia                  | 20.873  | 85   | 30  | 82   | 26  | 8   | 3  |
| GO | Acreúna                    | 22.710  | 93   | 33  | 89   | 28  | 9   | 3  |
| GO | Adelândia                  | 2.515   | 11   | 4   | 10   | 4   | 1   | 1  |
| GO | Água Fria de Goiás         | 5.843   | 24   | 9   | 23   | 8   | 3   | 1  |
| GO | Água Limpa                 | 1.809   | 8    | 3   | 8    | 3   | 1   | 1  |
| GO | Águas Lindas de Goiás      | 222.850 | 908  | 315 | 872  | 274 | 81  | 29 |
| GO | Alexânia                   | 28.360  | 116  | 40  | 111  | 35  | 11  | 4  |
| GO | Aloândia                   | 1.976   | 9    | 3   | 8    | 3   | 1   | 1  |
| GO | Alto Horizonte             | 6.796   | 28   | 10  | 27   | 9   | 3   | 1  |
| GO | Alto Paraíso de Goiás      | 7.751   | 32   | 11  | 31   | 10  | 3   | 2  |
| GO | Alvorada do Norte          | 8.749   | 36   | 13  | 35   | 11  | 4   | 2  |
| GO | Amaralina                  | 3.875   | 16   | 6   | 16   | 5   | 2   | 1  |
| GO | Americano do Brasil        | 6.220   | 26   | 9   | 25   | 8   | 3   | 1  |
| GO | Amorinópolis               | 3.011   | 13   | 5   | 12   | 4   | 2   | 1  |
| GO | Anápolis                   | 396.526 | 1615 | 560 | 1552 | 488 | 144 | 52 |
| GO | Anhanguera                 | 1.171   | 5    | 2   | 5    | 2   | 1   | 1  |
| GO | Anicuns                    | 22.113  | 91   | 32  | 87   | 28  | 8   | 3  |
| GO | Aparecida de Goiânia       | 601.844 | 2451 | 849 | 2355 | 740 | 218 | 79 |
| GO | Aparecida do Rio Doce      | 2.474   | 11   | 4   | 10   | 4   | 1   | 1  |
| GO | Aporé                      | 4.266   | 18   | 7   | 17   | 6   | 2   | 1  |

|    |                       |         |     |     |     |     |    |    |
|----|-----------------------|---------|-----|-----|-----|-----|----|----|
| GO | Araçu                 | 3.450   | 15  | 5   | 14  | 5   | 2  | 1  |
| GO | Aragarças             | 20.410  | 84  | 29  | 80  | 26  | 8  | 3  |
| GO | Aragoiânia            | 10.680  | 44  | 16  | 42  | 14  | 4  | 2  |
| GO | Araguapaz             | 7.795   | 32  | 11  | 31  | 10  | 3  | 2  |
| GO | Arenópolis            | 2.462   | 11  | 4   | 10  | 4   | 1  | 1  |
| GO | Aruanã                | 10.340  | 43  | 15  | 41  | 13  | 4  | 2  |
| GO | Aurilândia            | 3.000   | 13  | 5   | 12  | 4   | 2  | 1  |
| GO | Avelinópolis          | 2.401   | 10  | 4   | 10  | 3   | 1  | 1  |
| GO | Baliza                | 5.418   | 23  | 8   | 22  | 7   | 2  | 1  |
| GO | Barro Alto            | 11.643  | 48  | 17  | 46  | 15  | 5  | 2  |
| GO | Bela Vista de Goiás   | 31.004  | 127 | 44  | 122 | 39  | 12 | 5  |
| GO | Bom Jardim de Goiás   | 8.912   | 37  | 13  | 35  | 11  | 4  | 2  |
| GO | Bom Jesus de Goiás    | 26.069  | 107 | 37  | 102 | 33  | 10 | 4  |
| GO | Bonfinópolis          | 10.120  | 42  | 15  | 40  | 13  | 4  | 2  |
| GO | Bonópolis             | 4.579   | 19  | 7   | 18  | 6   | 2  | 1  |
| GO | Brazabrantes          | 3.812   | 16  | 6   | 15  | 5   | 2  | 1  |
| GO | Britânia              | 5.815   | 24  | 9   | 23  | 8   | 3  | 1  |
| GO | Buriti Alegre         | 9.515   | 39  | 14  | 38  | 12  | 4  | 2  |
| GO | Buriti de Goiás       | 2.464   | 11  | 4   | 10  | 4   | 1  | 1  |
| GO | Buritinópolis         | 3.272   | 14  | 5   | 13  | 5   | 2  | 1  |
| GO | Cabeceiras            | 8.098   | 33  | 12  | 32  | 10  | 3  | 2  |
| GO | Cachoeira Alta        | 12.843  | 53  | 19  | 51  | 16  | 5  | 2  |
| GO | Cachoeira de Goiás    | 1.336   | 6   | 2   | 6   | 2   | 1  | 1  |
| GO | Cachoeira Dourada     | 7.997   | 33  | 12  | 32  | 10  | 3  | 2  |
| GO | Caçu                  | 16.525  | 68  | 24  | 65  | 21  | 6  | 3  |
| GO | Caiapônia             | 19.304  | 79  | 28  | 76  | 24  | 7  | 3  |
| GO | Caldas Novas          | 95.183  | 388 | 135 | 373 | 117 | 35 | 13 |
| GO | Caldazinha            | 3.900   | 16  | 6   | 16  | 5   | 2  | 1  |
| GO | Campestre de Goiás    | 3.662   | 15  | 6   | 15  | 5   | 2  | 1  |
| GO | Campinaçu             | 3.628   | 15  | 6   | 15  | 5   | 2  | 1  |
| GO | Campinorte            | 12.880  | 53  | 19  | 51  | 16  | 5  | 2  |
| GO | Campo Alegre de Goiás | 7.884   | 33  | 12  | 31  | 10  | 3  | 2  |
| GO | Campo Limpo de Goiás  | 8.087   | 33  | 12  | 32  | 10  | 3  | 2  |
| GO | Campos Belos          | 20.124  | 82  | 29  | 79  | 25  | 8  | 3  |
| GO | Campos Verdes         | 1.526   | 7   | 3   | 6   | 2   | 1  | 1  |
| GO | Carmo do Rio Verde    | 10.299  | 42  | 15  | 41  | 13  | 4  | 2  |
| GO | Castelândia           | 3.380   | 14  | 5   | 14  | 5   | 2  | 1  |
| GO | Catalão               | 113.091 | 461 | 160 | 443 | 139 | 41 | 15 |
| GO | Caturai               | 5.132   | 21  | 8   | 21  | 7   | 2  | 1  |
| GO | Cavalcante            | 9.740   | 40  | 14  | 39  | 12  | 4  | 2  |
| GO | Ceres                 | 22.407  | 92  | 32  | 88  | 28  | 9  | 3  |
| GO | Cezarina              | 8.794   | 36  | 13  | 35  | 11  | 4  | 2  |
| GO | Chapadão do Céu       | 10.797  | 44  | 16  | 43  | 14  | 4  | 2  |
| GO | Cidade Ocidental      | 74.370  | 303 | 105 | 291 | 92  | 27 | 10 |
| GO | Cocalzinho de Goiás   | 20.771  | 85  | 30  | 82  | 26  | 8  | 3  |
| GO | Colinas do Sul        | 3.339   | 14  | 5   | 14  | 5   | 2  | 1  |
| GO | Córrego do Ouro       | 2.254   | 10  | 4   | 9   | 3   | 1  | 1  |
| GO | Corumbá de Goiás      | 11.223  | 46  | 16  | 44  | 14  | 5  | 2  |
| GO | Corumbáiba            | 10.012  | 41  | 15  | 40  | 13  | 4  | 2  |
| GO | Cristalina            | 61.385  | 250 | 87  | 241 | 76  | 23 | 8  |
| GO | Cristianópolis        | 2.962   | 13  | 5   | 12  | 4   | 2  | 1  |
| GO | Crixás                | 17.136  | 70  | 25  | 68  | 22  | 7  | 3  |
| GO | Cromínia              | 3.458   | 15  | 5   | 14  | 5   | 2  | 1  |
| GO | Cumari                | 2.820   | 12  | 4   | 12  | 4   | 2  | 1  |
| GO | Damianópolis          | 3.302   | 14  | 5   | 13  | 5   | 2  | 1  |
| GO | Damolândia            | 2.944   | 12  | 5   | 12  | 4   | 2  | 1  |
| GO | Davinópolis           | 2.094   | 9   | 3   | 9   | 3   | 1  | 1  |
| GO | Diorama               | 2.477   | 11  | 4   | 10  | 4   | 1  | 1  |
| GO | Doverlândia           | 7.174   | 30  | 11  | 29  | 9   | 3  | 1  |
| GO | Edealina              | 3.678   | 15  | 6   | 15  | 5   | 2  | 1  |
| GO | Edéia                 | 12.559  | 52  | 18  | 50  | 16  | 5  | 2  |
| GO | Estrela do Norte      | 3.253   | 14  | 5   | 13  | 4   | 2  | 1  |
| GO | Faina                 | 6.527   | 27  | 10  | 26  | 9   | 3  | 1  |
| GO | Fazenda Nova          | 5.471   | 23  | 8   | 22  | 7   | 2  | 1  |
| GO | Firminópolis          | 13.604  | 56  | 20  | 54  | 17  | 5  | 2  |
| GO | Flores de Goiás       | 17.415  | 71  | 25  | 69  | 22  | 7  | 3  |

|    |                        |           |      |      |      |      |     |     |
|----|------------------------|-----------|------|------|------|------|-----|-----|
| GO | Formosa                | 125.705   | 512  | 178  | 492  | 155  | 46  | 17  |
| GO | Formoso                | 4.098     | 17   | 6    | 17   | 6    | 2   | 1   |
| GO | Gameleira de Goiás     | 3.923     | 16   | 6    | 16   | 5    | 2   | 1   |
| GO | Divinópolis de Goiás   | 4.701     | 20   | 7    | 19   | 6    | 2   | 1   |
| GO | Goianópolis            | 11.217    | 46   | 16   | 44   | 14   | 5   | 2   |
| GO | Goianira               | 5.650     | 24   | 8    | 23   | 7    | 3   | 1   |
| GO | Goianésia              | 72.045    | 294  | 102  | 282  | 89   | 27  | 10  |
| GO | Goiânia                | 1.555.626 | 6335 | 2194 | 6087 | 1912 | 563 | 203 |
| GO | Goianira               | 46.278    | 189  | 66   | 182  | 57   | 17  | 7   |
| GO | Goiás                  | 22.122    | 91   | 32   | 87   | 28   | 9   | 3   |
| GO | Goiatuba               | 34.307    | 140  | 49   | 135  | 43   | 13  | 5   |
| GO | Gouvelândia            | 6.076     | 25   | 9    | 24   | 8    | 3   | 1   |
| GO | Guapó                  | 14.206    | 58   | 21   | 56   | 18   | 6   | 2   |
| GO | Guaraíta               | 1.905     | 8    | 3    | 8    | 3    | 1   | 1   |
| GO | Guarani de Goiás       | 3.801     | 16   | 6    | 15   | 5    | 2   | 1   |
| GO | Guarinos               | 1.681     | 7    | 3    | 7    | 3    | 1   | 1   |
| GO | Heitorai               | 3.742     | 16   | 6    | 15   | 5    | 2   | 1   |
| GO | Hidrolândia            | 22.533    | 92   | 32   | 89   | 28   | 9   | 3   |
| GO | Hidrolina              | 3.450     | 15   | 5    | 14   | 5    | 2   | 1   |
| GO | Iaciara                | 14.215    | 58   | 21   | 56   | 18   | 6   | 2   |
| GO | Inaciolândia           | 6.275     | 26   | 9    | 25   | 8    | 3   | 1   |
| GO | Indiara                | 15.962    | 66   | 23   | 63   | 20   | 6   | 3   |
| GO | Inhumas                | 53.655    | 219  | 76   | 210  | 66   | 20  | 7   |
| GO | Ipameri                | 27.365    | 112  | 39   | 108  | 34   | 10  | 4   |
| GO | Ipiranga de Goiás      | 2.892     | 12   | 5    | 12   | 4    | 2   | 1   |
| GO | Iporá                  | 31.471    | 129  | 45   | 124  | 39   | 12  | 5   |
| GO | Israelândia            | 2.772     | 12   | 4    | 11   | 4    | 2   | 1   |
| GO | Itaberai               | 44.329    | 181  | 63   | 174  | 55   | 17  | 6   |
| GO | Itaguari               | 4.684     | 20   | 7    | 19   | 6    | 2   | 1   |
| GO | Itaguaru               | 5.184     | 22   | 8    | 21   | 7    | 2   | 1   |
| GO | Itajá                  | 4.412     | 18   | 7    | 18   | 6    | 2   | 1   |
| GO | Itapaci                | 23.850    | 98   | 34   | 94   | 30   | 9   | 4   |
| GO | Itapirapuã             | 4.380     | 18   | 7    | 18   | 6    | 2   | 1   |
| GO | Itapuranga             | 25.597    | 105  | 37   | 101  | 32   | 10  | 4   |
| GO | Itarumã                | 7.337     | 30   | 11   | 29   | 10   | 3   | 1   |
| GO | Itauçu                 | 8.968     | 37   | 13   | 36   | 12   | 4   | 2   |
| GO | Itumbiara              | 106.845   | 436  | 151  | 419  | 132  | 39  | 14  |
| GO | Ivolândia              | 2.295     | 10   | 4    | 9    | 3    | 1   | 1   |
| GO | Jandaia                | 6.001     | 25   | 9    | 24   | 8    | 3   | 1   |
| GO | Jaraguá                | 52.160    | 213  | 74   | 205  | 65   | 19  | 7   |
| GO | Jataí                  | 103.221   | 421  | 146  | 404  | 127  | 38  | 14  |
| GO | Jaupaci                | 2.843     | 12   | 5    | 12   | 4    | 2   | 1   |
| GO | Jesópolis              | 2.497     | 11   | 4    | 10   | 4    | 1   | 1   |
| GO | Joviânia               | 7.417     | 31   | 11   | 30   | 10   | 3   | 1   |
| GO | Jussara                | 18.266    | 75   | 26   | 72   | 23   | 7   | 3   |
| GO | Lagoa Santa            | 1.652     | 7    | 3    | 7    | 3    | 1   | 1   |
| GO | Leopoldo de Bulhões    | 7.663     | 32   | 11   | 30   | 10   | 3   | 1   |
| GO | Luziânia               | 214.645   | 875  | 303  | 840  | 264  | 78  | 28  |
| GO | Mairipotaba            | 2.358     | 10   | 4    | 10   | 3    | 1   | 1   |
| GO | Mambaí                 | 9.277     | 38   | 14   | 37   | 12   | 4   | 2   |
| GO | Mara Rosa              | 9.234     | 38   | 14   | 37   | 12   | 4   | 2   |
| GO | Marzagão               | 2.263     | 10   | 4    | 9    | 3    | 1   | 1   |
| GO | Matrinchã              | 4.321     | 18   | 7    | 17   | 6    | 2   | 1   |
| GO | Maurilândia            | 14.568    | 60   | 21   | 57   | 18   | 6   | 2   |
| GO | Mimoso de Goiás        | 2.575     | 11   | 4    | 11   | 4    | 1   | 1   |
| GO | Minaçu                 | 28.518    | 117  | 41   | 112  | 36   | 11  | 4   |
| GO | Mineiros               | 69.477    | 283  | 98   | 272  | 86   | 26  | 10  |
| GO | Moiporá                | 1.471     | 6    | 3    | 6    | 2    | 1   | 1   |
| GO | Monte Alegre de Goiás  | 8.759     | 36   | 13   | 35   | 11   | 4   | 2   |
| GO | Montes Claros de Goiás | 8.037     | 33   | 12   | 32   | 10   | 3   | 2   |
| GO | Montividiu             | 13.935    | 57   | 20   | 55   | 18   | 6   | 2   |
| GO | Montividiu do Norte    | 4.538     | 19   | 7    | 18   | 6    | 2   | 1   |
| GO | Morrinhos              | 46.955    | 192  | 67   | 184  | 58   | 17  | 7   |
| GO | Morro Agudo de Goiás   | 2.217     | 10   | 4    | 9    | 3    | 1   | 1   |
| GO | Mossâmedes             | 4.120     | 17   | 6    | 17   | 6    | 2   | 1   |
| GO | Mozarlândia            | 16.077    | 66   | 23   | 63   | 20   | 6   | 3   |

|    |                             |         |      |     |     |     |    |    |
|----|-----------------------------|---------|------|-----|-----|-----|----|----|
| GO | Mundo Novo                  | 4.540   | 19   | 7   | 18  | 6   | 2  | 1  |
| GO | Mutunópolis                 | 3.749   | 16   | 6   | 15  | 5   | 2  | 1  |
| GO | Nazário                     | 9.375   | 39   | 14  | 37  | 12  | 4  | 2  |
| GO | Nerópolis                   | 30.931  | 126  | 44  | 122 | 39  | 12 | 5  |
| GO | Niquelândia                 | 47.064  | 192  | 67  | 185 | 58  | 18 | 7  |
| GO | Nova América                | 2.362   | 10   | 4   | 10  | 3   | 1  | 1  |
| GO | Nova Aurora                 | 2.236   | 10   | 4   | 9   | 3   | 1  | 1  |
| GO | Nova Crixás                 | 13.020  | 54   | 19  | 51  | 16  | 5  | 2  |
| GO | Nova Glória                 | 8.063   | 33   | 12  | 32  | 10  | 3  | 2  |
| GO | Nova Iguaçu de Goiás        | 2.939   | 12   | 5   | 12  | 4   | 2  | 1  |
| GO | Nova Roma                   | 3.208   | 14   | 5   | 13  | 4   | 2  | 1  |
| GO | Nova Veneza                 | 10.193  | 42   | 15  | 40  | 13  | 4  | 2  |
| GO | Novo Brasil                 | 2.775   | 12   | 4   | 11  | 4   | 2  | 1  |
| GO | Novo Gama                   | 119.649 | 488  | 169 | 469 | 148 | 44 | 16 |
| GO | Novo Planalto               | 4.592   | 19   | 7   | 18  | 6   | 2  | 1  |
| GO | Orizona                     | 15.834  | 65   | 23  | 62  | 20  | 6  | 3  |
| GO | Ouro Verde de Goiás         | 3.679   | 15   | 6   | 15  | 5   | 2  | 1  |
| GO | Ouvidor                     | 6.895   | 29   | 10  | 27  | 9   | 3  | 1  |
| GO | Padre Bernardo              | 35.011  | 143  | 50  | 137 | 44  | 13 | 5  |
| GO | Palestina de Goiás          | 3.470   | 15   | 5   | 14  | 5   | 2  | 1  |
| GO | Palmeiras de Goiás          | 29.915  | 122  | 43  | 118 | 37  | 11 | 4  |
| GO | Palmelo                     | 2.382   | 10   | 4   | 10  | 3   | 1  | 1  |
| GO | Palminópolis                | 3.578   | 15   | 6   | 14  | 5   | 2  | 1  |
| GO | Panamá                      | 2.590   | 11   | 4   | 11  | 4   | 1  | 1  |
| GO | Paranaiguara                | 10.221  | 42   | 15  | 40  | 13  | 4  | 2  |
| GO | Paraúna                     | 10.988  | 45   | 16  | 43  | 14  | 4  | 2  |
| GO | Perolândia                  | 3.156   | 13   | 5   | 13  | 4   | 2  | 1  |
| GO | Petrolina de Goiás          | 10.240  | 42   | 15  | 41  | 13  | 4  | 2  |
| GO | Pilar de Goiás              | 2.135   | 9    | 4   | 9   | 3   | 1  | 1  |
| GO | Piracanjuba                 | 24.543  | 100  | 35  | 97  | 31  | 9  | 4  |
| GO | Piranhas                    | 10.161  | 42   | 15  | 40  | 13  | 4  | 2  |
| GO | Pirenópolis                 | 25.218  | 103  | 36  | 99  | 31  | 10 | 4  |
| GO | Pires do Rio                | 31.909  | 130  | 45  | 125 | 40  | 12 | 5  |
| GO | Planaltina                  | 91.345  | 372  | 129 | 358 | 113 | 34 | 12 |
| GO | Pontalina                   | 17.899  | 73   | 26  | 71  | 22  | 7  | 3  |
| GO | Porangatu                   | 45.866  | 187  | 65  | 180 | 57  | 17 | 6  |
| GO | Porteirão                   | 3.979   | 17   | 6   | 16  | 5   | 2  | 1  |
| GO | Portelândia                 | 4.032   | 17   | 6   | 16  | 5   | 2  | 1  |
| GO | Posse                       | 37.924  | 155  | 54  | 149 | 47  | 14 | 5  |
| GO | Professor Jamil             | 3.211   | 14   | 5   | 13  | 4   | 2  | 1  |
| GO | Quirinópolis                | 51.323  | 209  | 73  | 201 | 64  | 19 | 7  |
| GO | Rialma                      | 10.961  | 45   | 16  | 43  | 14  | 4  | 2  |
| GO | Rianópolis                  | 4.832   | 20   | 7   | 19  | 6   | 2  | 1  |
| GO | Rio Quente                  | 4.728   | 20   | 7   | 19  | 6   | 2  | 1  |
| GO | Rio Verde                   | 247.259 | 1007 | 349 | 968 | 304 | 90 | 33 |
| GO | Rubiataba                   | 20.012  | 82   | 29  | 79  | 25  | 8  | 3  |
| GO | Sanclerlândia               | 7.630   | 32   | 11  | 30  | 10  | 3  | 1  |
| GO | Santa Bárbara de Goiás      | 6.701   | 28   | 10  | 27  | 9   | 3  | 1  |
| GO | Santa Cruz de Goiás         | 2.782   | 12   | 4   | 11  | 4   | 2  | 1  |
| GO | Santa Fé de Goiás           | 5.585   | 23   | 8   | 22  | 7   | 3  | 1  |
| GO | Santa Helena de Goiás       | 38.962  | 159  | 55  | 153 | 48  | 15 | 6  |
| GO | Santa Isabel                | 3.821   | 16   | 6   | 15  | 5   | 2  | 1  |
| GO | Santa Rita do Araguaia      | 9.110   | 38   | 13  | 36  | 12  | 4  | 2  |
| GO | Santa Rita do Novo Destino  | 3.367   | 14   | 5   | 14  | 5   | 2  | 1  |
| GO | Santa Rosa de Goiás         | 2.200   | 9    | 4   | 9   | 3   | 1  | 1  |
| GO | Santa Tereza de Goiás       | 3.207   | 14   | 5   | 13  | 4   | 2  | 1  |
| GO | Santa Terezinha de Goiás    | 8.386   | 35   | 12  | 33  | 11  | 4  | 2  |
| GO | Santo Antônio da Barra      | 4.886   | 20   | 7   | 20  | 7   | 2  | 1  |
| GO | Santo Antônio de Goiás      | 6.593   | 27   | 10  | 26  | 9   | 3  | 1  |
| GO | Santo Antônio do Descoberto | 76.871  | 314  | 109 | 301 | 95  | 28 | 10 |
| GO | São Domingos                | 13.305  | 55   | 19  | 53  | 17  | 5  | 2  |
| GO | São Francisco de Goiás      | 6.265   | 26   | 9   | 25  | 8   | 3  | 1  |
| GO | São João d'Aliança          | 14.423  | 59   | 21  | 57  | 18  | 6  | 2  |
| GO | São João da Paraúna         | 1.312   | 6    | 2   | 6   | 2   | 1  | 1  |
| GO | São Luís de Montes Belos    | 34.488  | 141  | 49  | 135 | 43  | 13 | 5  |
| GO | São Luiz do Norte           | 5.263   | 22   | 8   | 21  | 7   | 2  | 1  |

|    |                           |         |     |     |     |     |    |    |
|----|---------------------------|---------|-----|-----|-----|-----|----|----|
| GO | São Miguel do Araguaia    | 21.849  | 89  | 31  | 86  | 27  | 8  | 3  |
| GO | São Miguel do Passa Quatr | 4.105   | 17  | 6   | 17  | 6   | 2  | 1  |
| GO | São Patrício              | 2.040   | 9   | 3   | 8   | 3   | 1  | 1  |
| GO | São Simão                 | 21.318  | 87  | 31  | 84  | 27  | 8  | 3  |
| GO | Senador Canedo            | 121.447 | 495 | 172 | 476 | 150 | 44 | 16 |
| GO | Serranópolis              | 8.737   | 36  | 13  | 35  | 11  | 4  | 2  |
| GO | Silvânia                  | 20.938  | 86  | 30  | 82  | 26  | 8  | 3  |
| GO | Simolândia                | 6.895   | 29  | 10  | 27  | 9   | 3  | 1  |
| GO | Sítio d'Abadia            | 3.040   | 13  | 5   | 12  | 4   | 2  | 1  |
| GO | Taquaral de Goiás         | 3.506   | 15  | 5   | 14  | 5   | 2  | 1  |
| GO | Teresina de Goiás         | 3.538   | 15  | 5   | 14  | 5   | 2  | 1  |
| GO | Terezópolis de Goiás      | 8.326   | 34  | 12  | 33  | 11  | 4  | 2  |
| GO | Três Ranchos              | 2.830   | 12  | 4   | 12  | 4   | 2  | 1  |
| GO | Trindade                  | 132.006 | 538 | 187 | 517 | 163 | 48 | 18 |
| GO | Trombas                   | 3.497   | 15  | 5   | 14  | 5   | 2  | 1  |
| GO | Turvânia                  | 4.526   | 19  | 7   | 18  | 6   | 2  | 1  |
| GO | Turvelândia               | 5.447   | 23  | 8   | 22  | 7   | 2  | 1  |
| GO | Uirapuru                  | 2.829   | 12  | 4   | 12  | 4   | 2  | 1  |
| GO | Uruaçu                    | 41.150  | 168 | 59  | 162 | 51  | 15 | 6  |
| GO | Uruana                    | 13.795  | 57  | 20  | 54  | 17  | 5  | 2  |
| GO | Urutaí                    | 3.056   | 13  | 5   | 12  | 4   | 2  | 1  |
| GO | Valparaíso de Goiás       | 175.720 | 716 | 248 | 688 | 216 | 64 | 23 |
| GO | Varjão                    | 3.848   | 16  | 6   | 16  | 5   | 2  | 1  |
| GO | Vianópolis                | 14.088  | 58  | 20  | 56  | 18  | 6  | 2  |
| GO | Vicentinópolis            | 9.002   | 37  | 13  | 36  | 12  | 4  | 2  |
| GO | Vila Boa                  | 6.451   | 27  | 10  | 26  | 8   | 3  | 1  |
| GO | Vila Propício             | 5.941   | 25  | 9   | 24  | 8   | 3  | 1  |
